# Supplementary material for: Increasing aerosol optical depth spatial and temporal availability by merging datasets from geostationary and sun-synchronous satellites
Source: Copernicus journal article supplement (doi:10.5194/amt-17-5455-2024), 2024-09-16

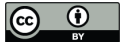

*Supplement of*

## **Increasing aerosol optical depth spatial and temporal availability by merging datasets from geostationary and sun-synchronous satellites**

**Pawan Gupta et al.**

*Correspondence to:* Pawan Gupta ([pawan.gupta@nasa.gov](mailto:pawan.gupta@nasa.gov))

The copyright of individual parts of the supplement might differ from the article licence.

Adelaide\_Site\_7-AMJ

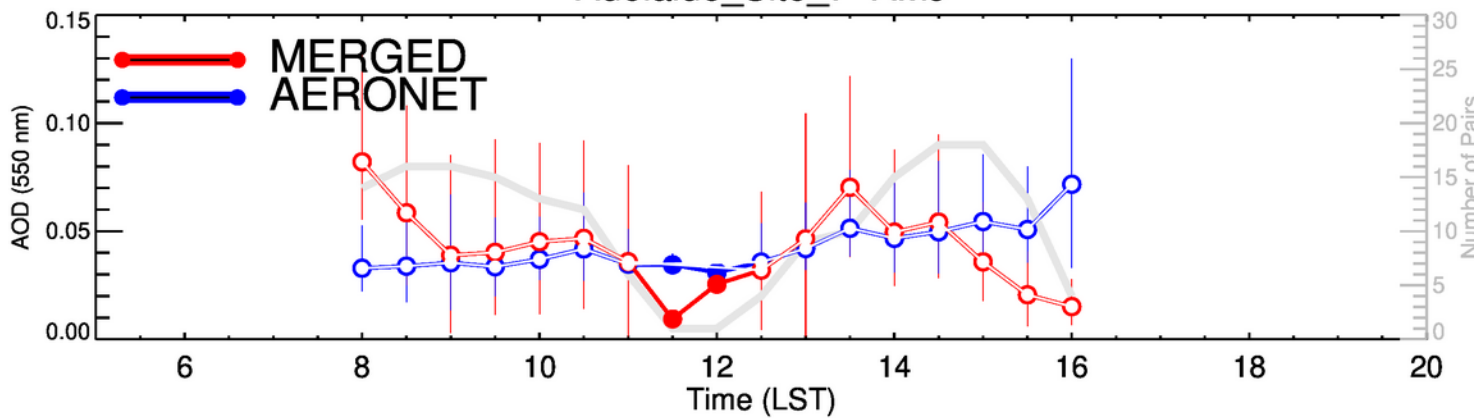

Adelaide\_Site\_7-JAS

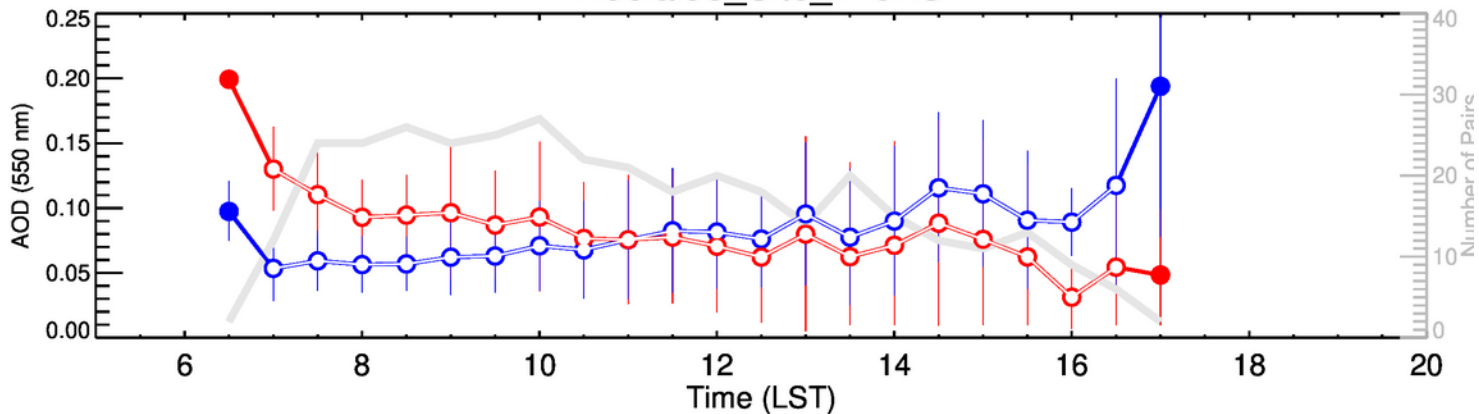

Adelaide\_Site\_7-OND

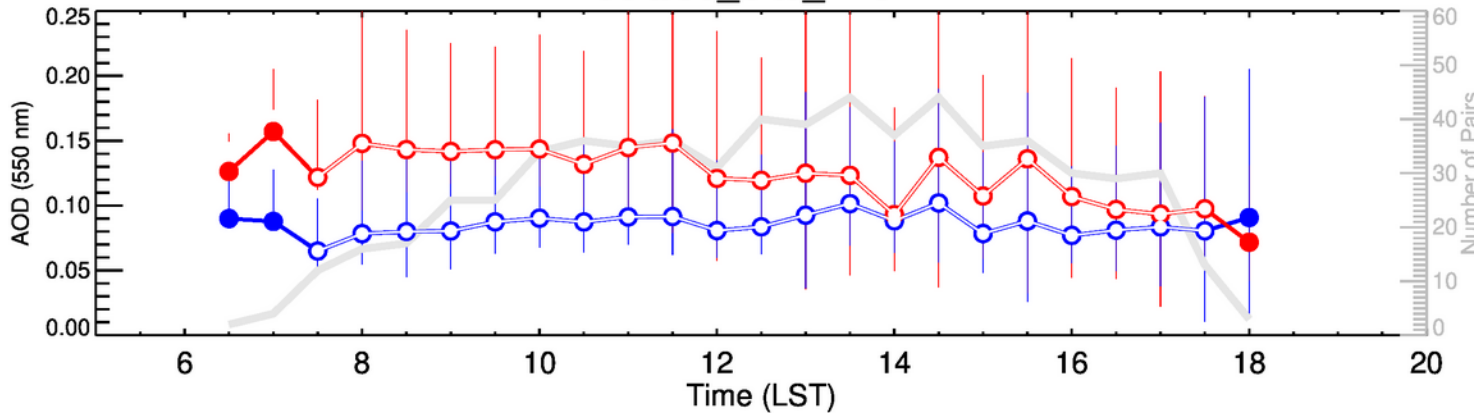

Adelaide\_Site\_7-JFM

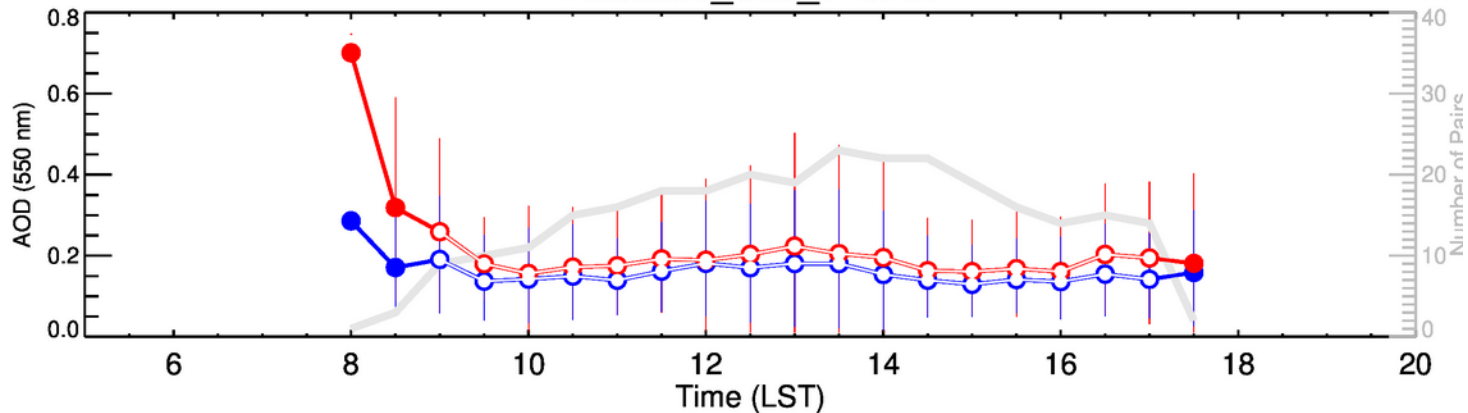

AgiaMarina\_Xyliatou-AMJ

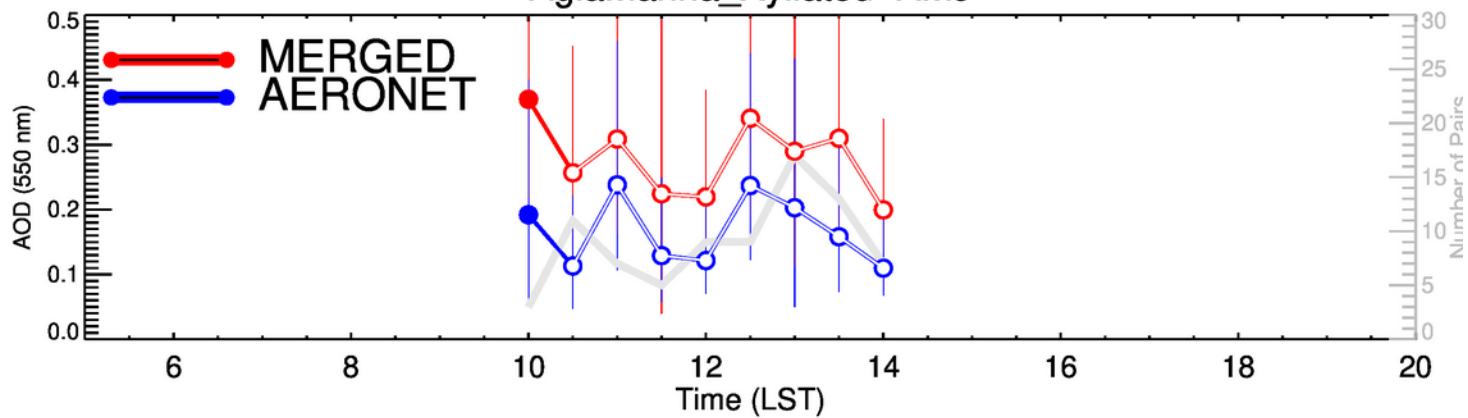

AgiaMarina\_Xyliatou-JAS

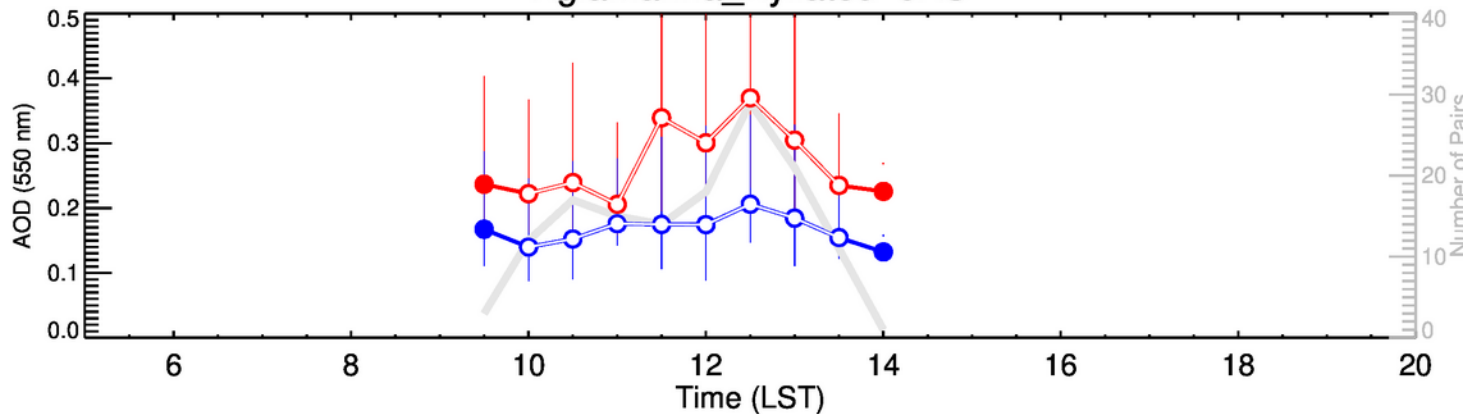

AgiaMarina\_Xyliatou-OND

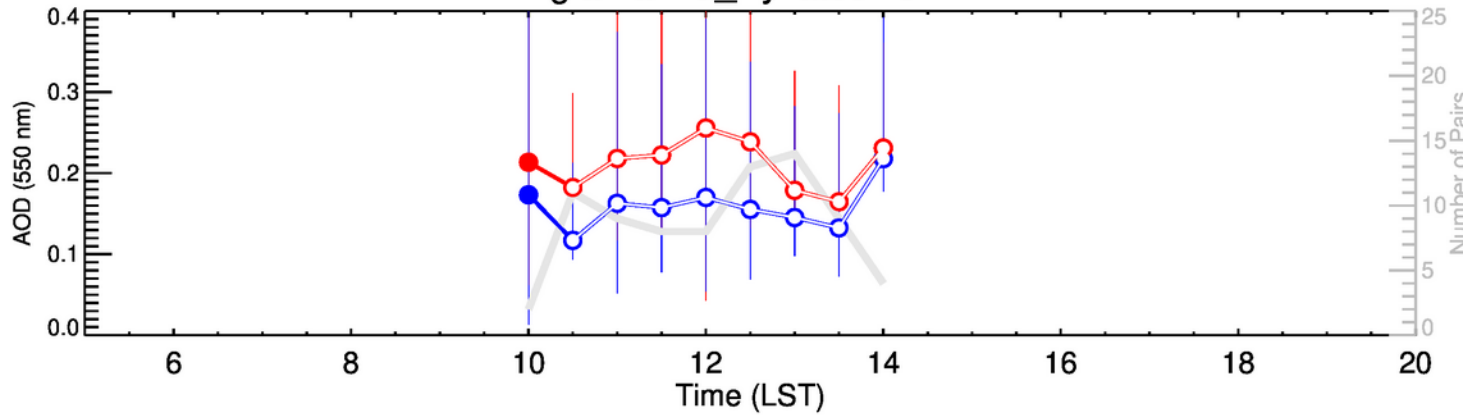

AgiaMarina\_Xyliatou-JFM

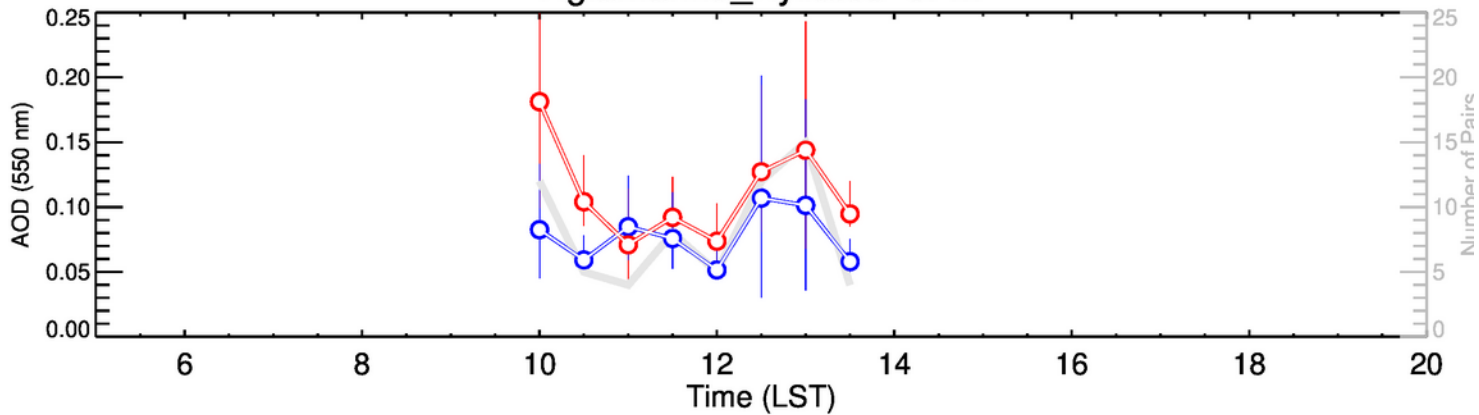

### Alta\_Floresta-AMJ

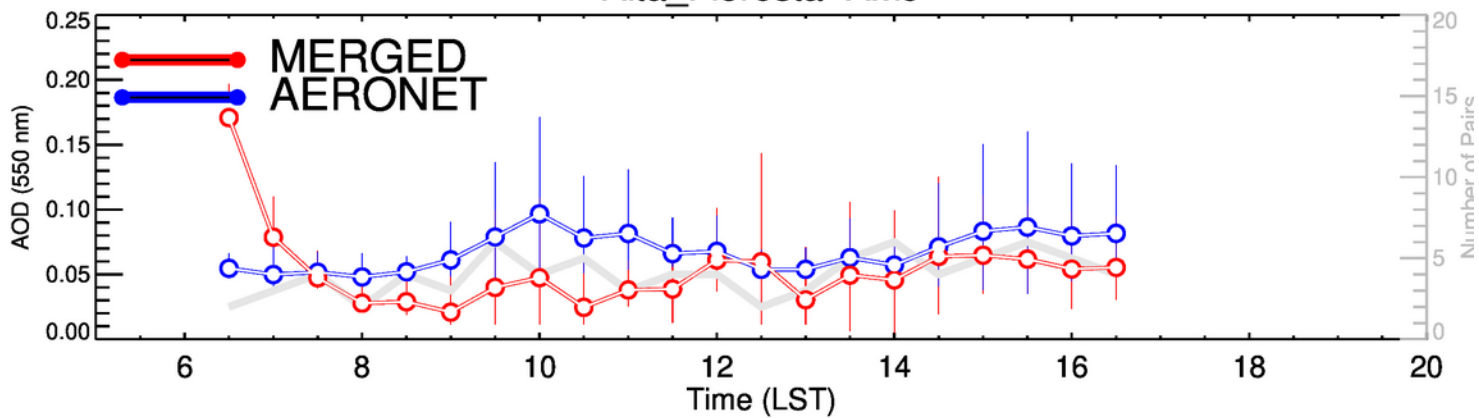

### Alta\_Floresta-JAS

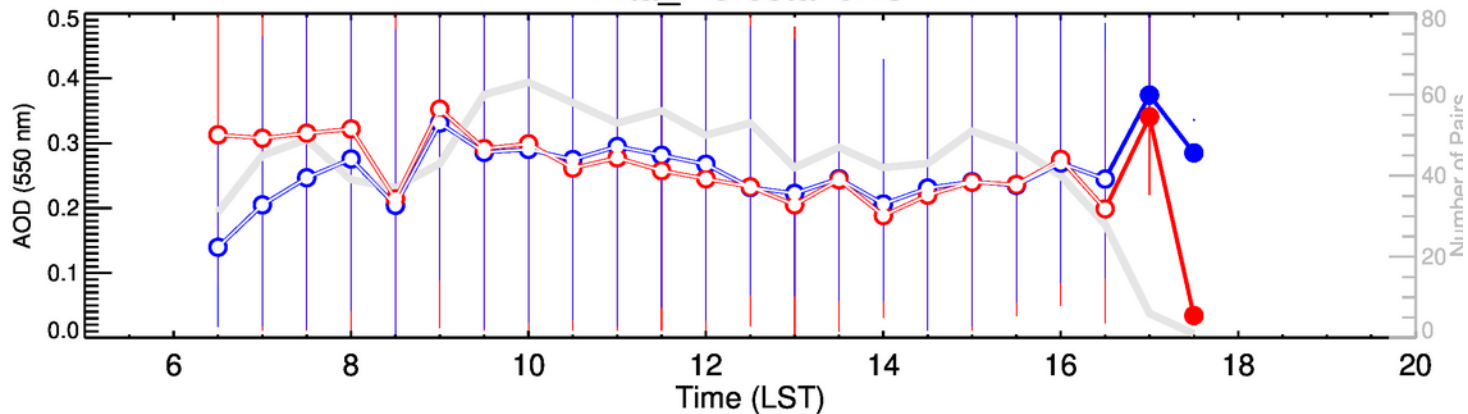

### Alta\_Floresta-OND

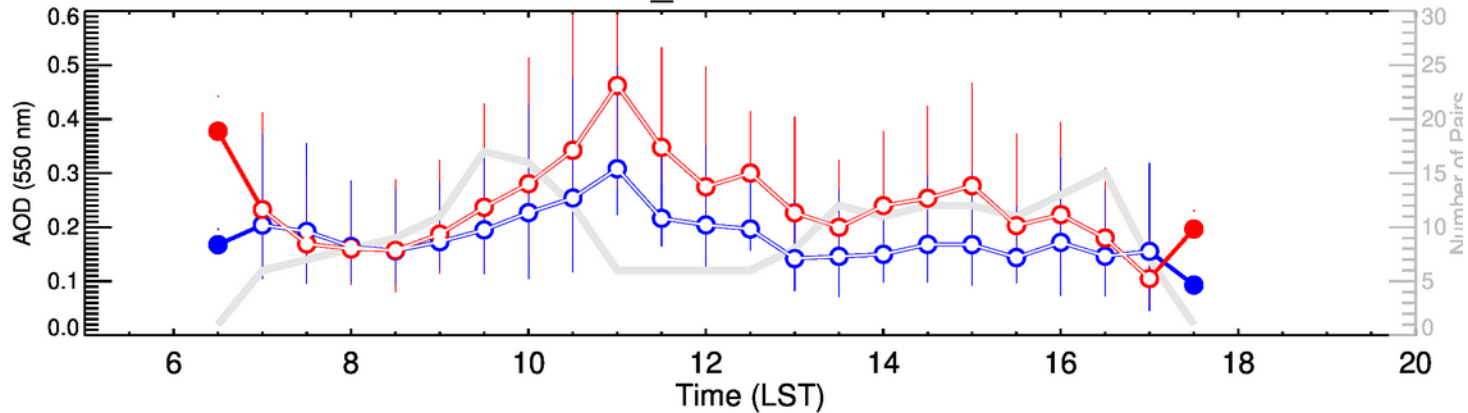

### Alta\_Floresta-JFM

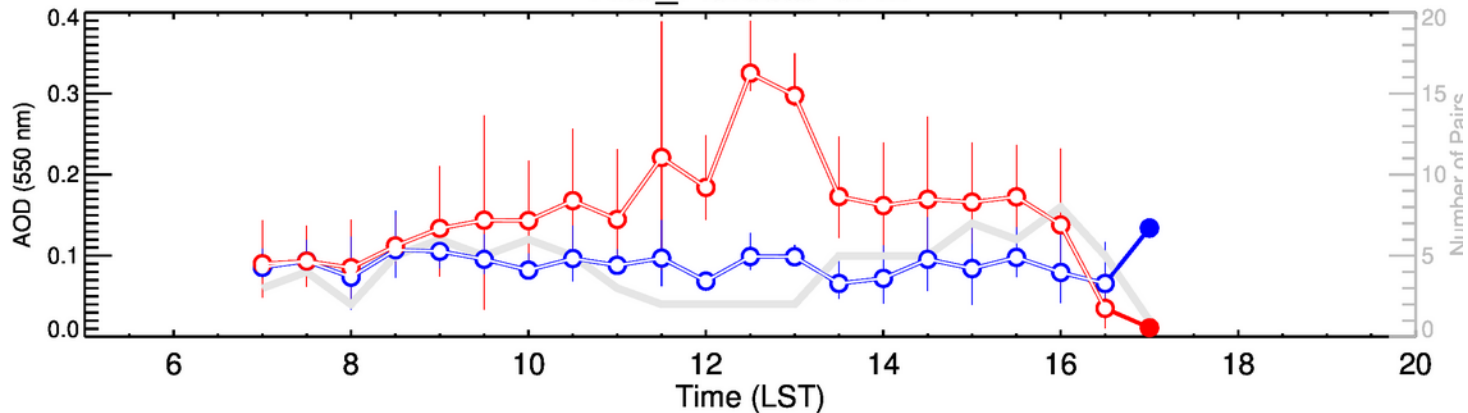

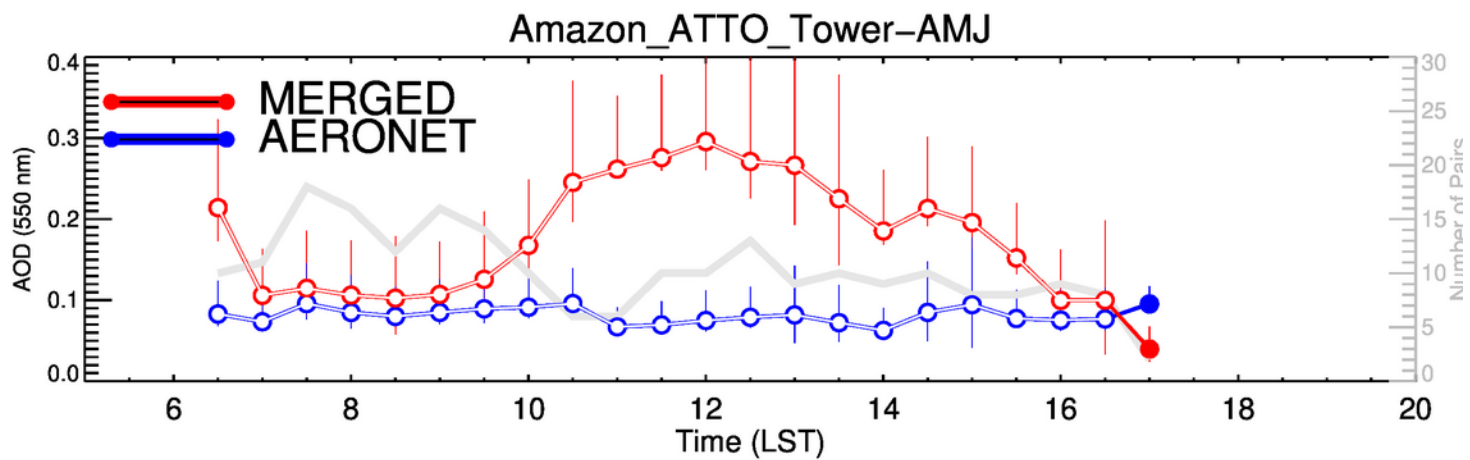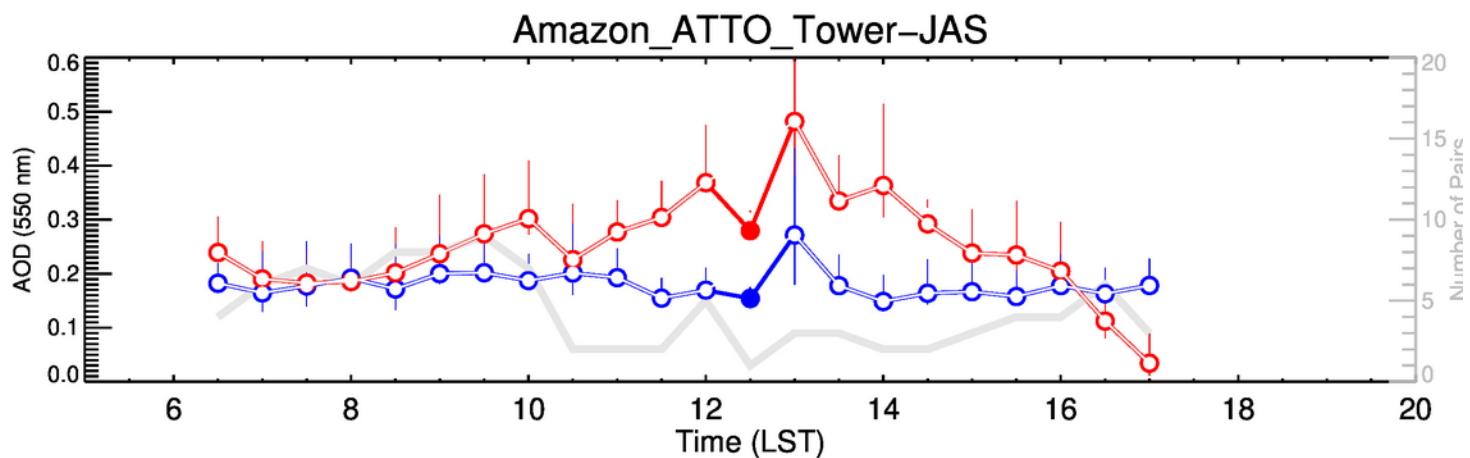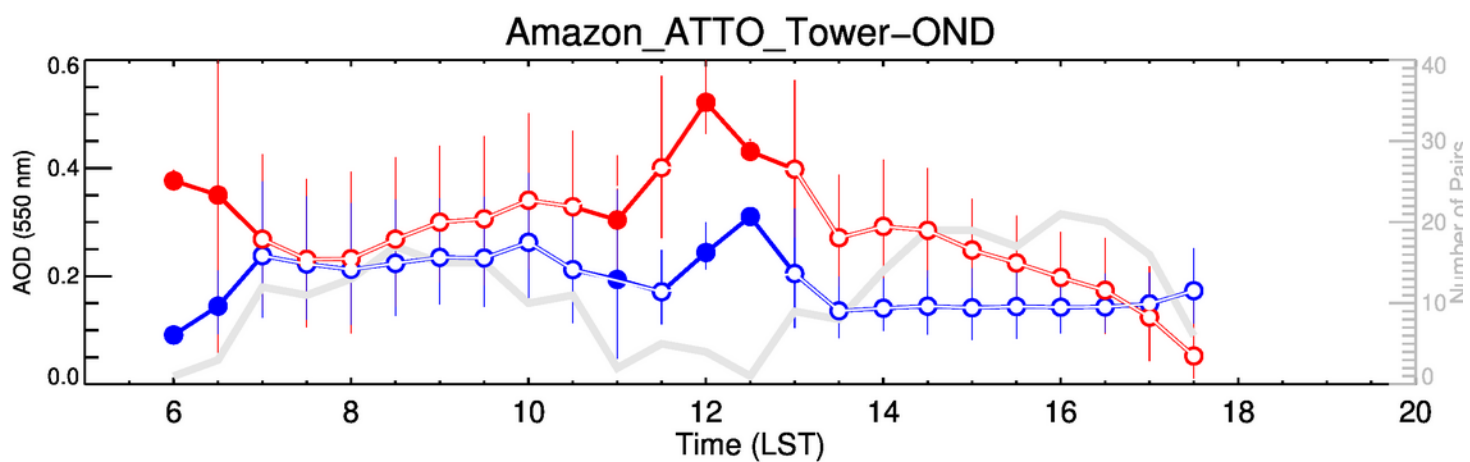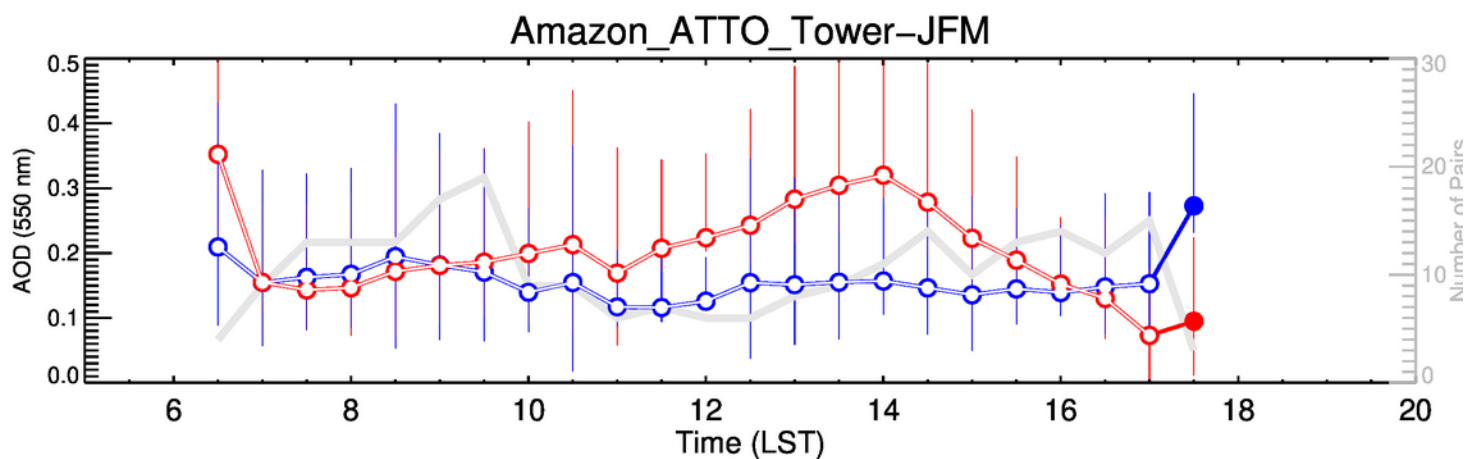

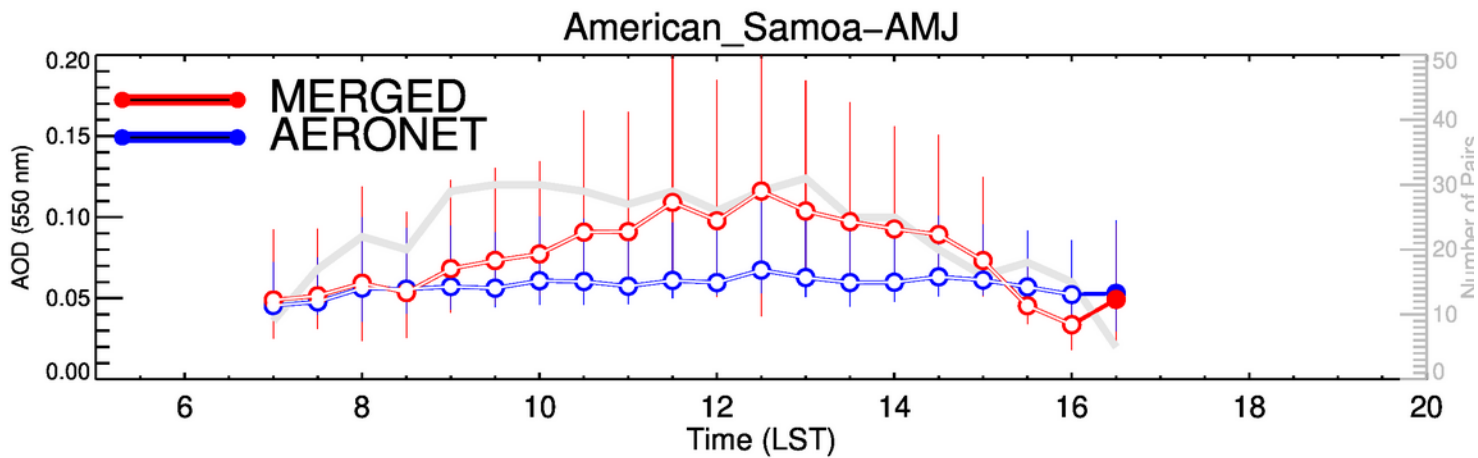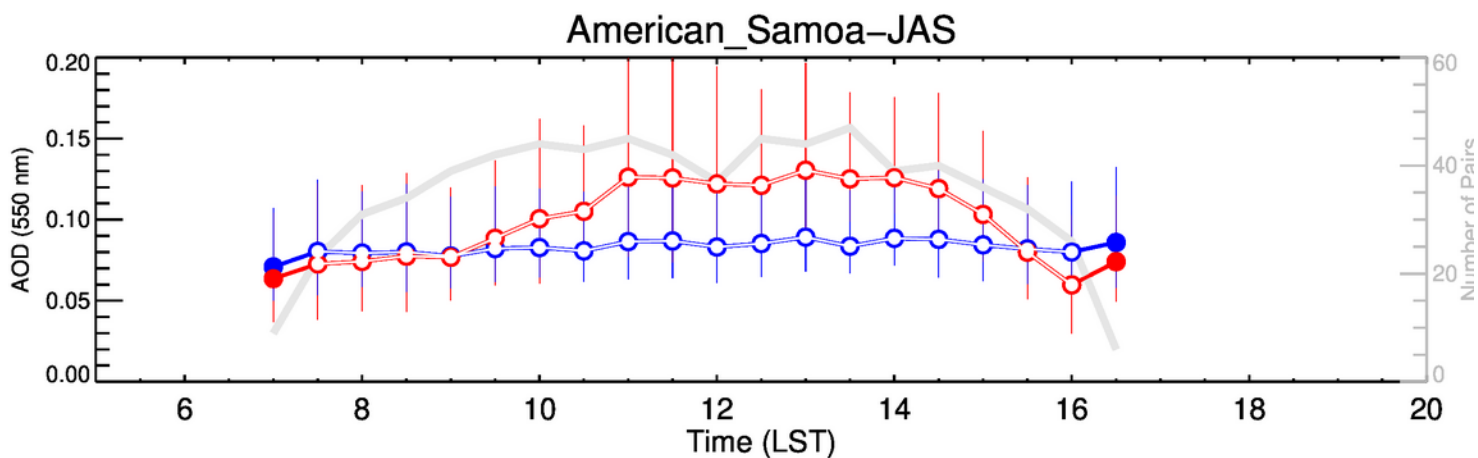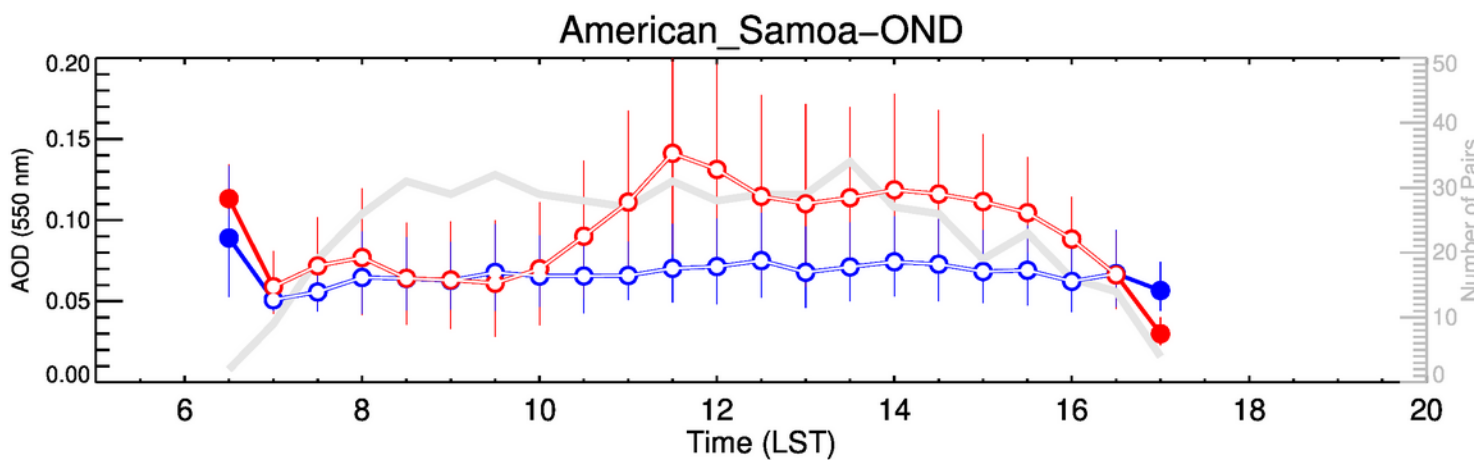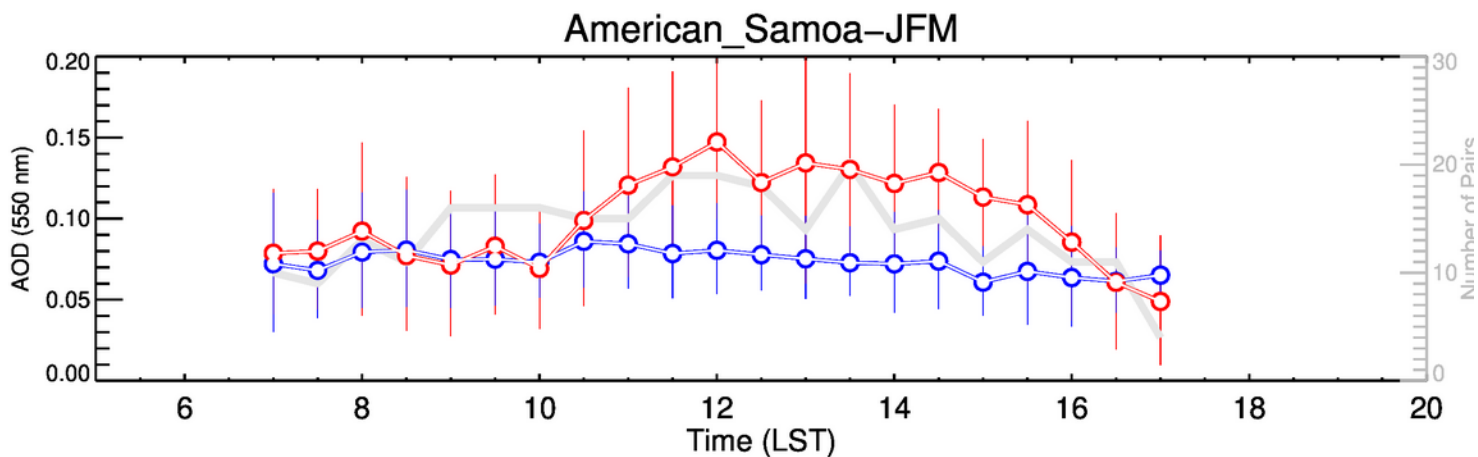

### Ames-JAS

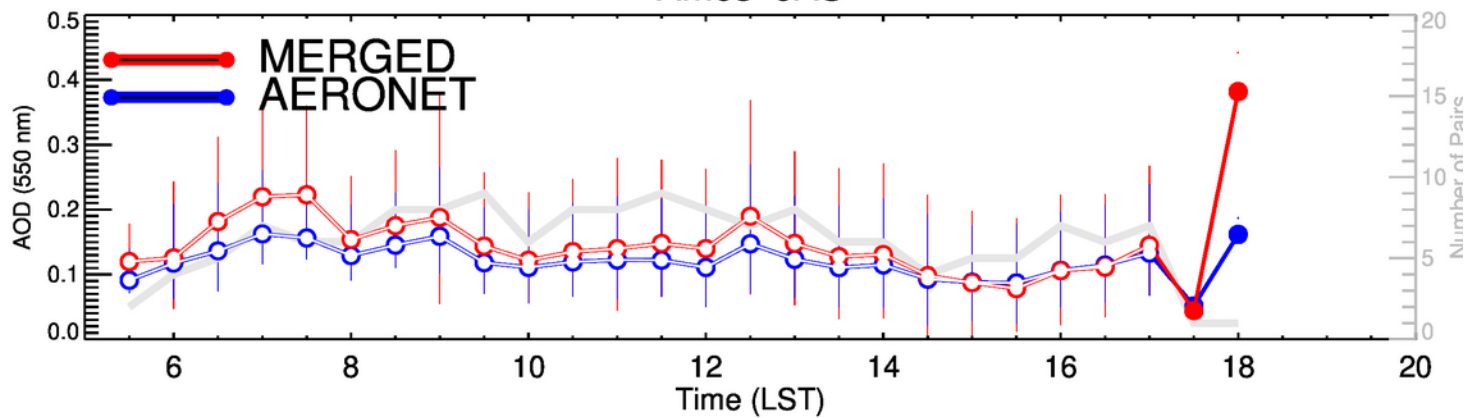

### Ames-OND

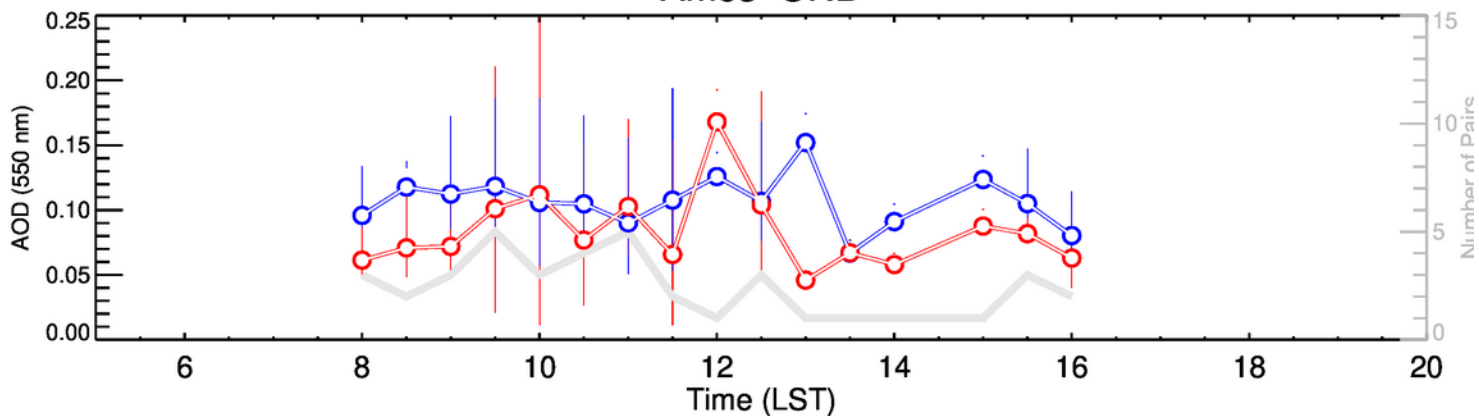

### Ames-JFM

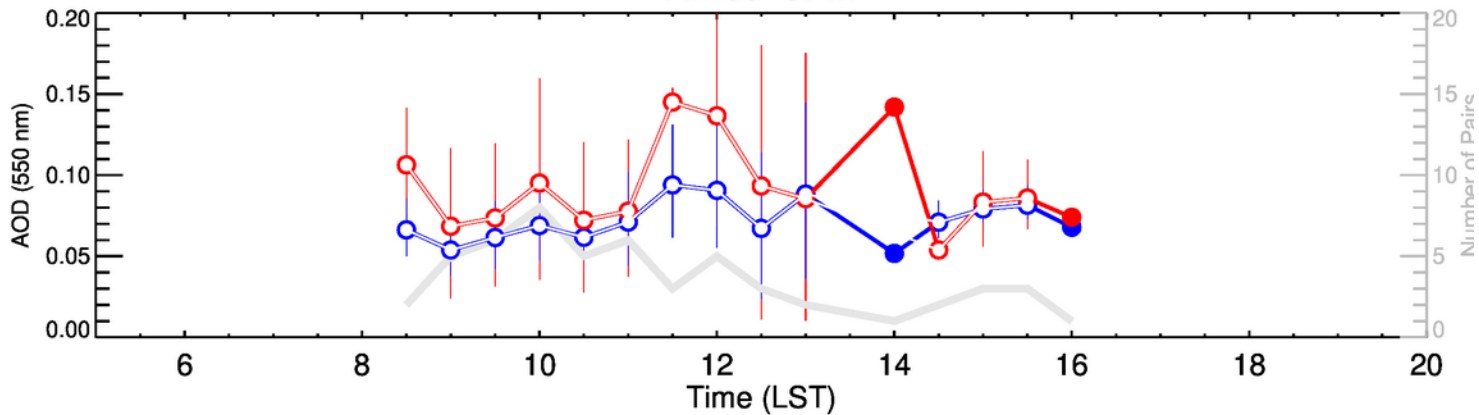

Amity\_ Univ\_ Gurgaon-OND

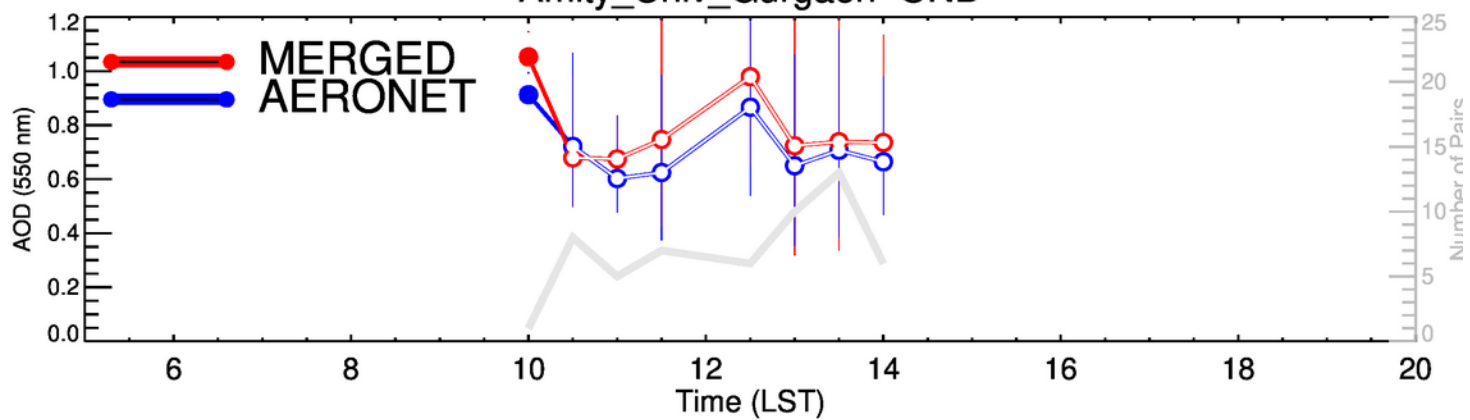

Amity\_ Univ\_ Gurgaon-JFM

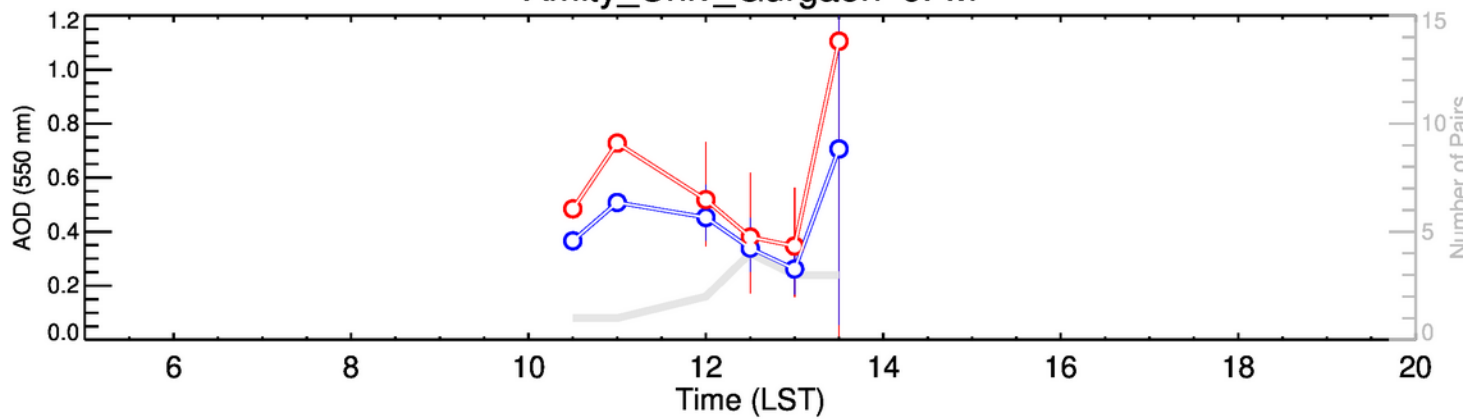



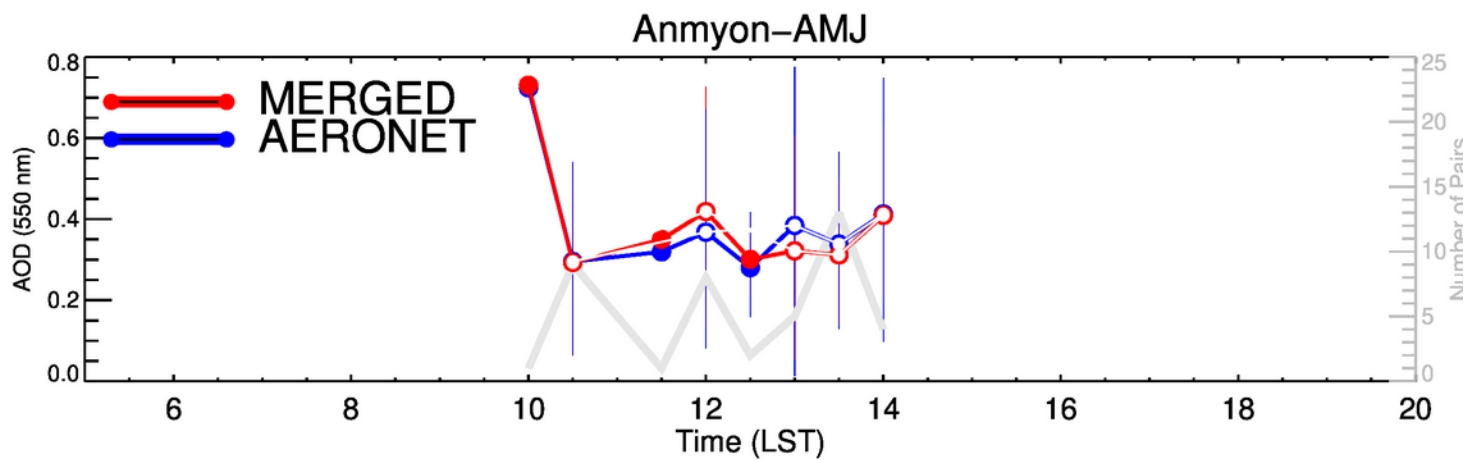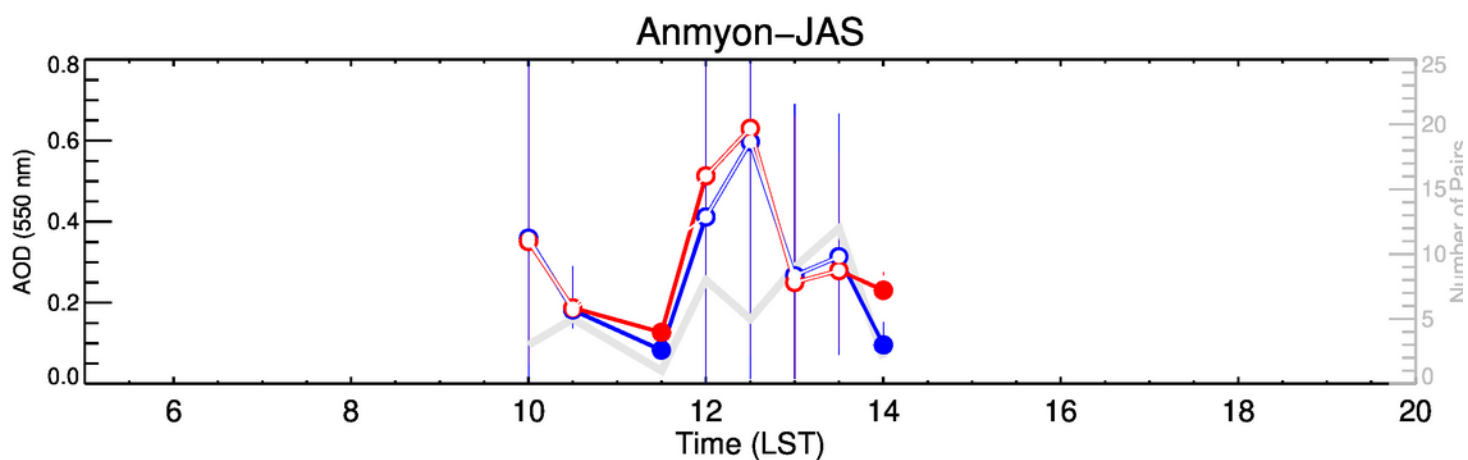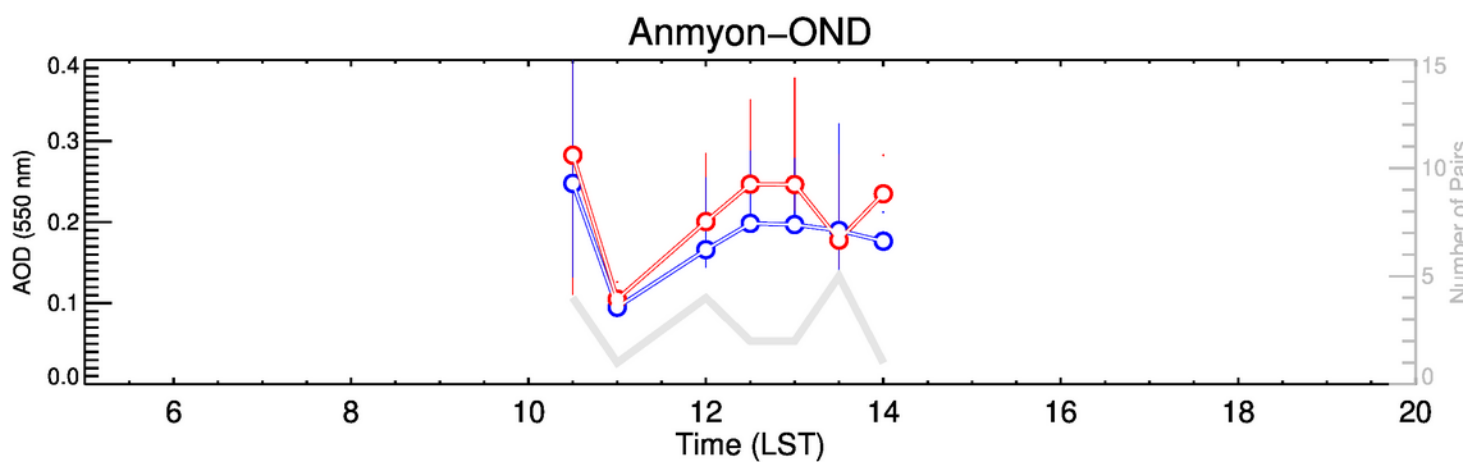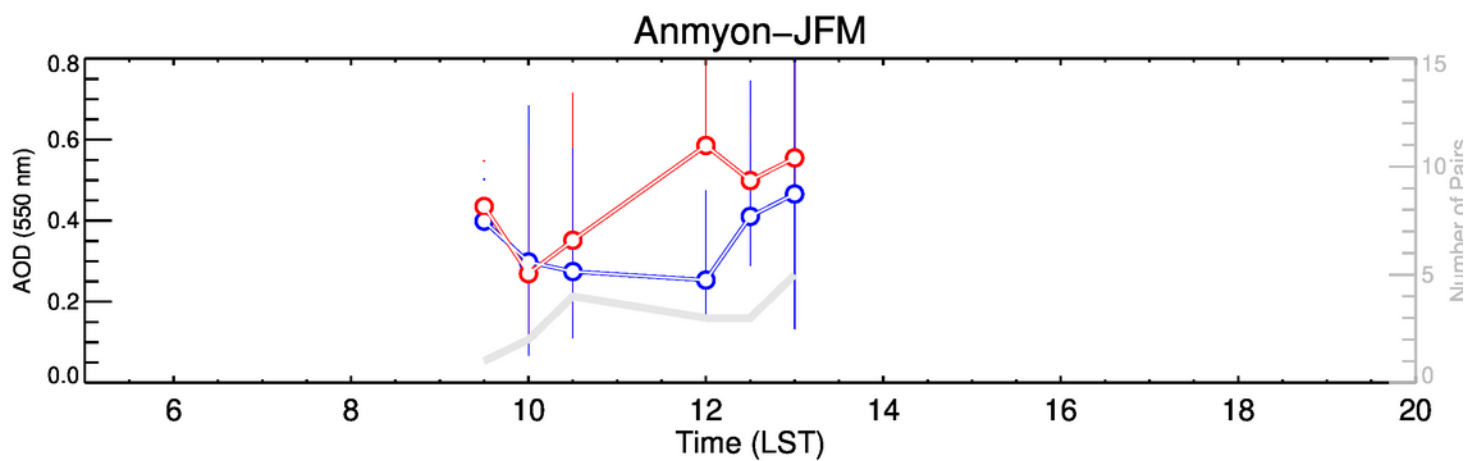

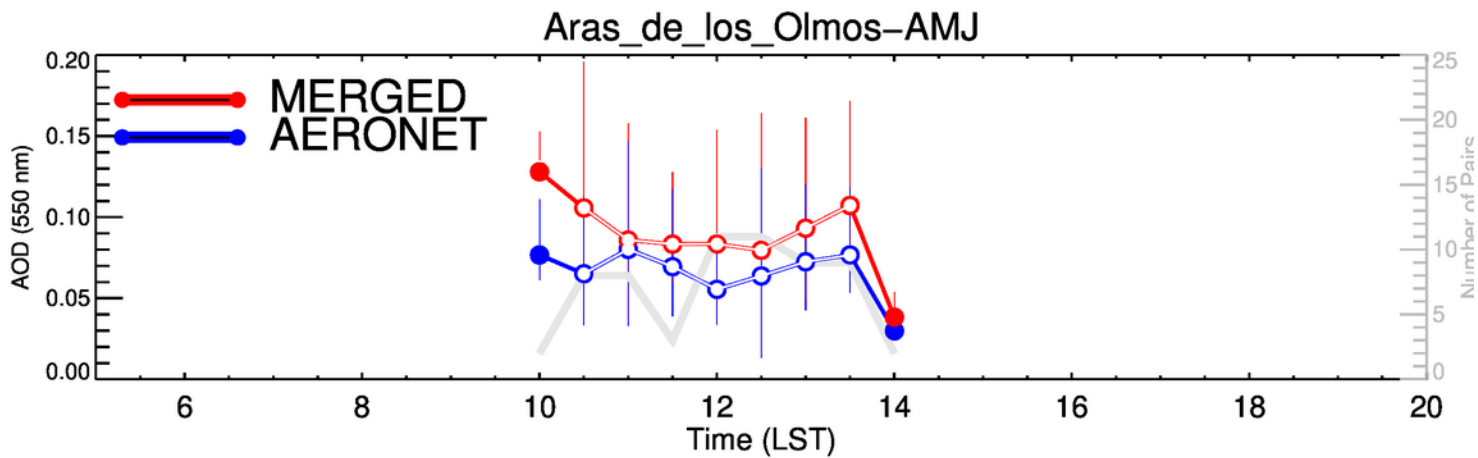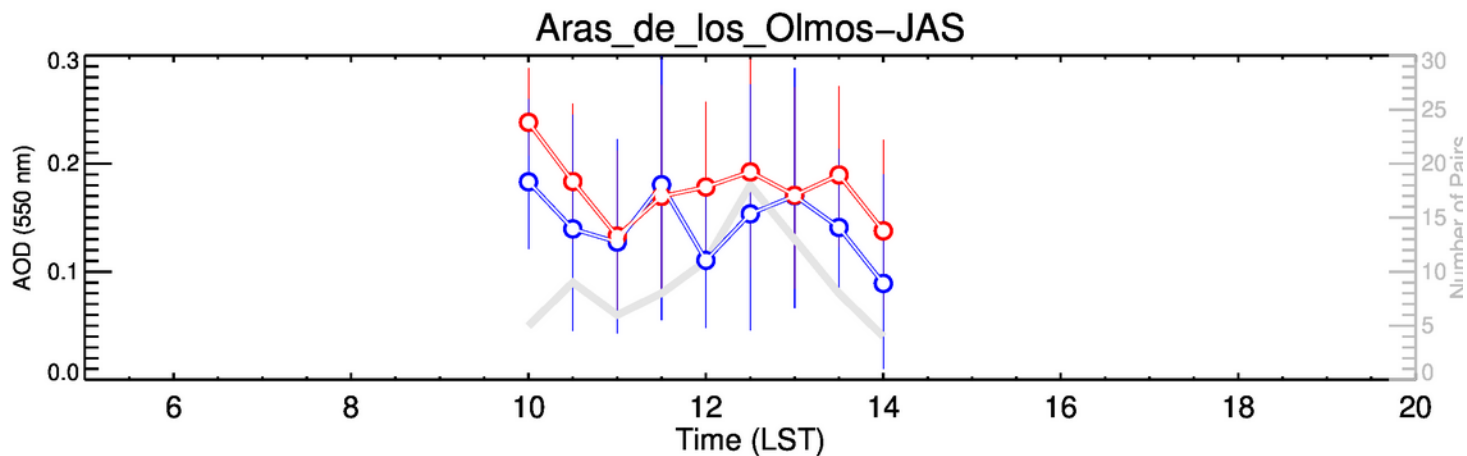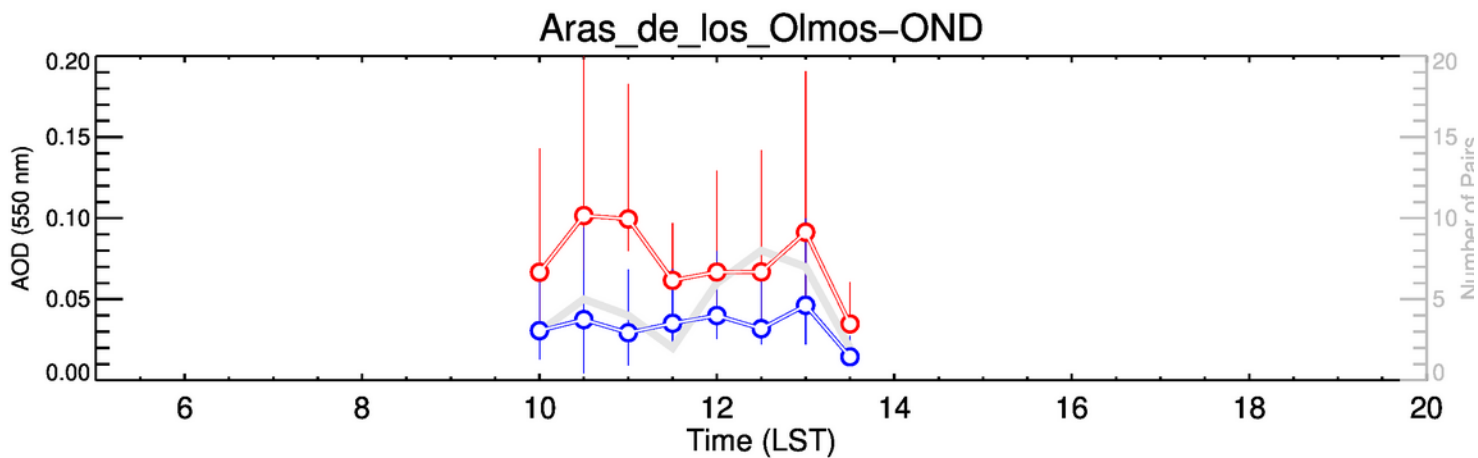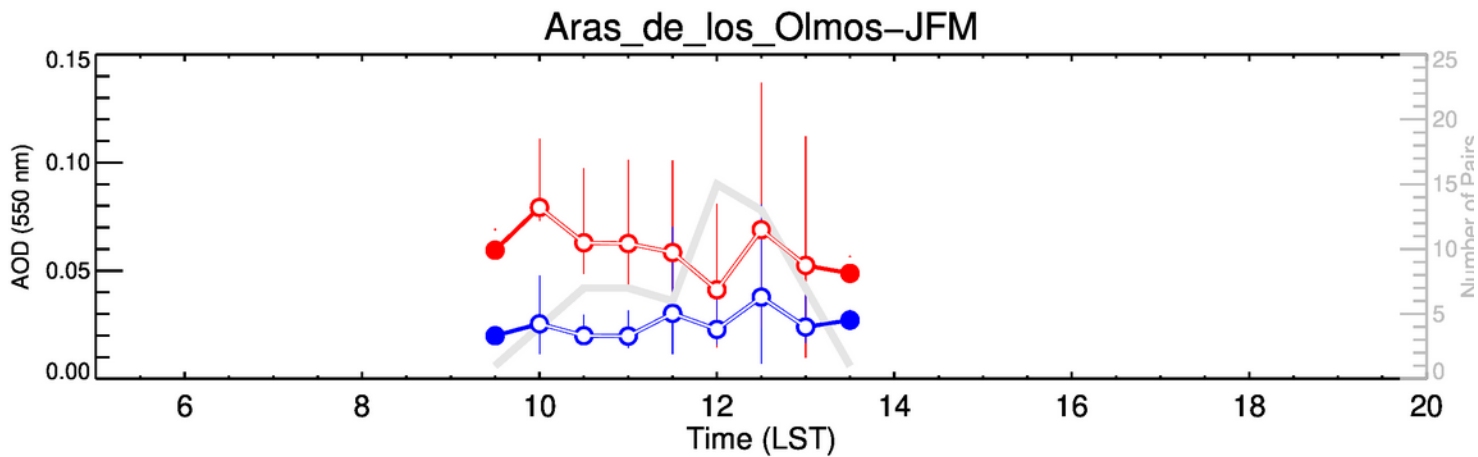

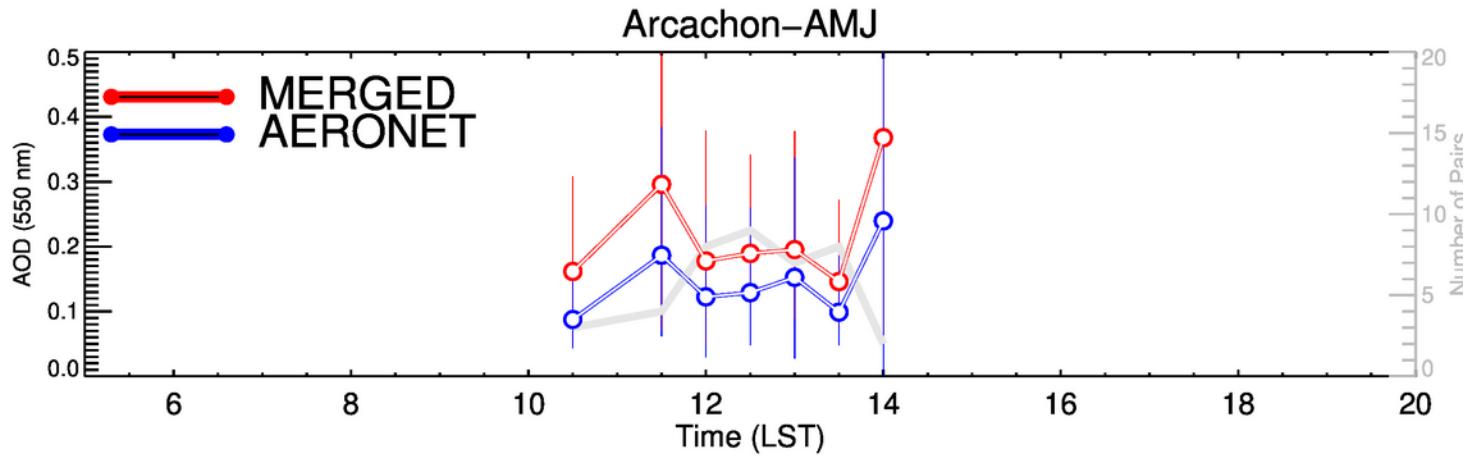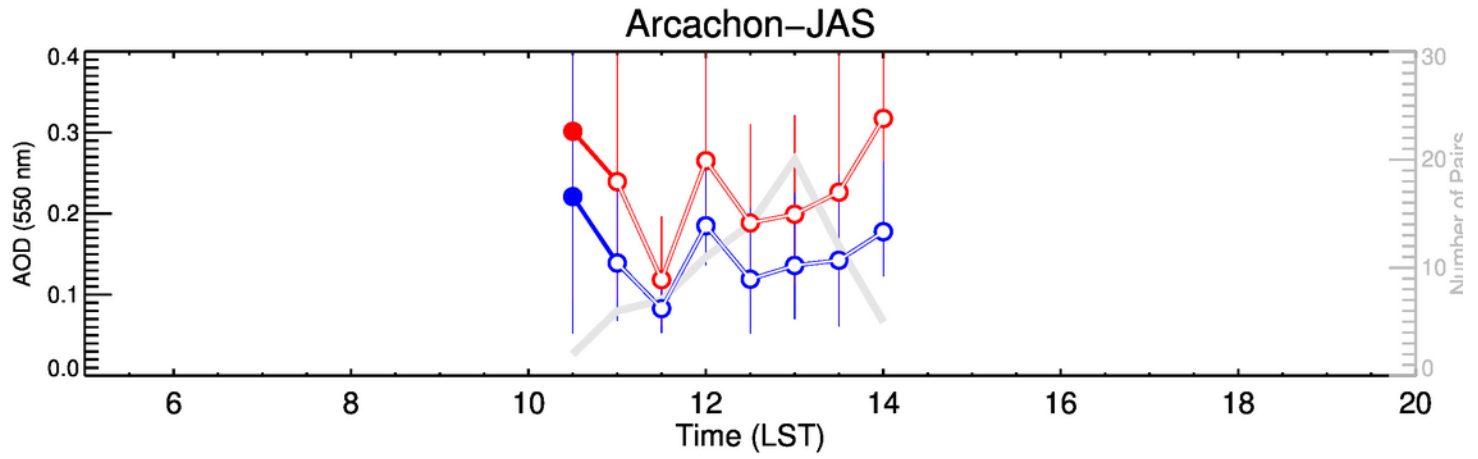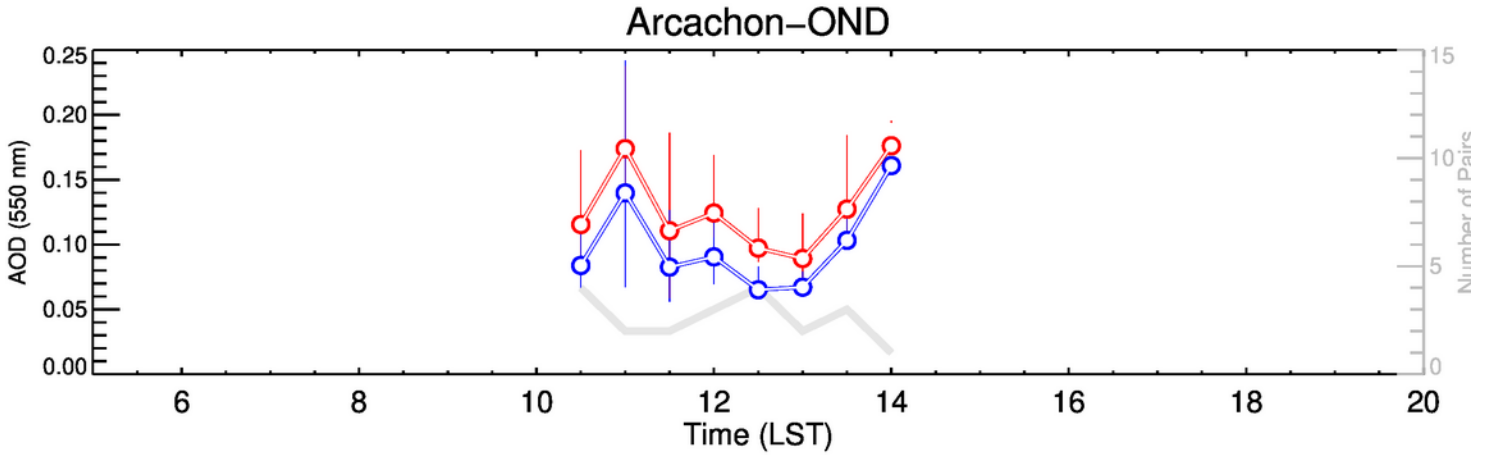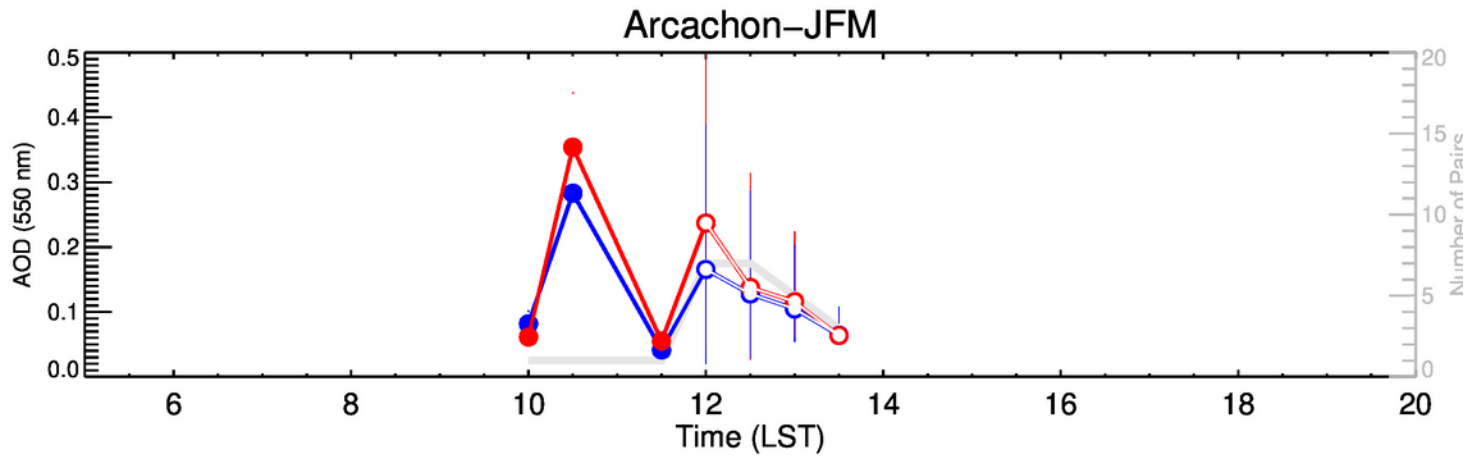

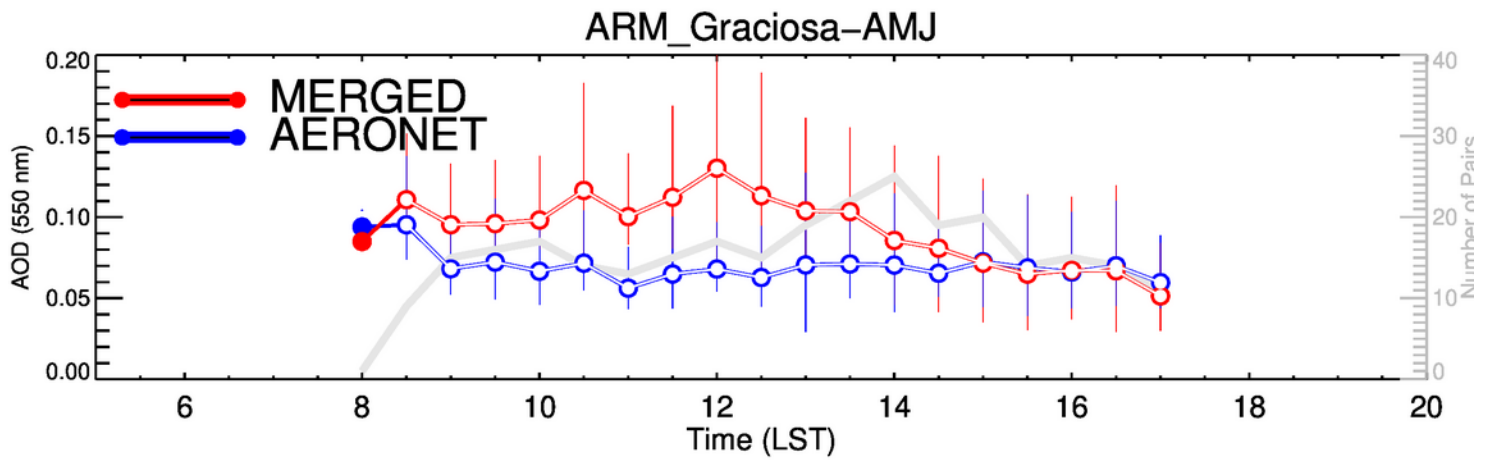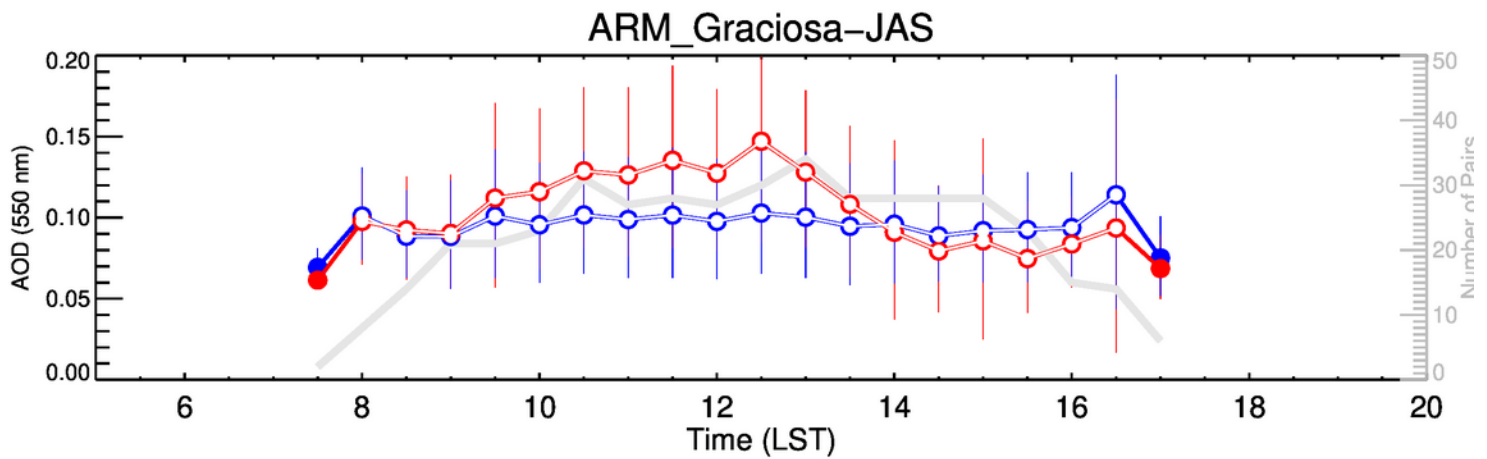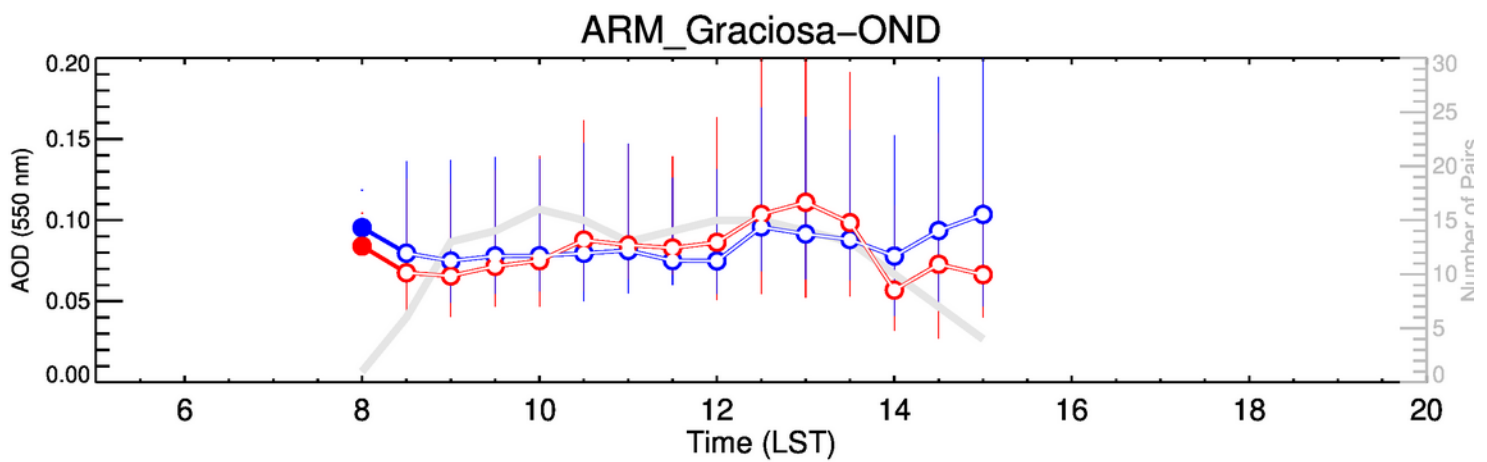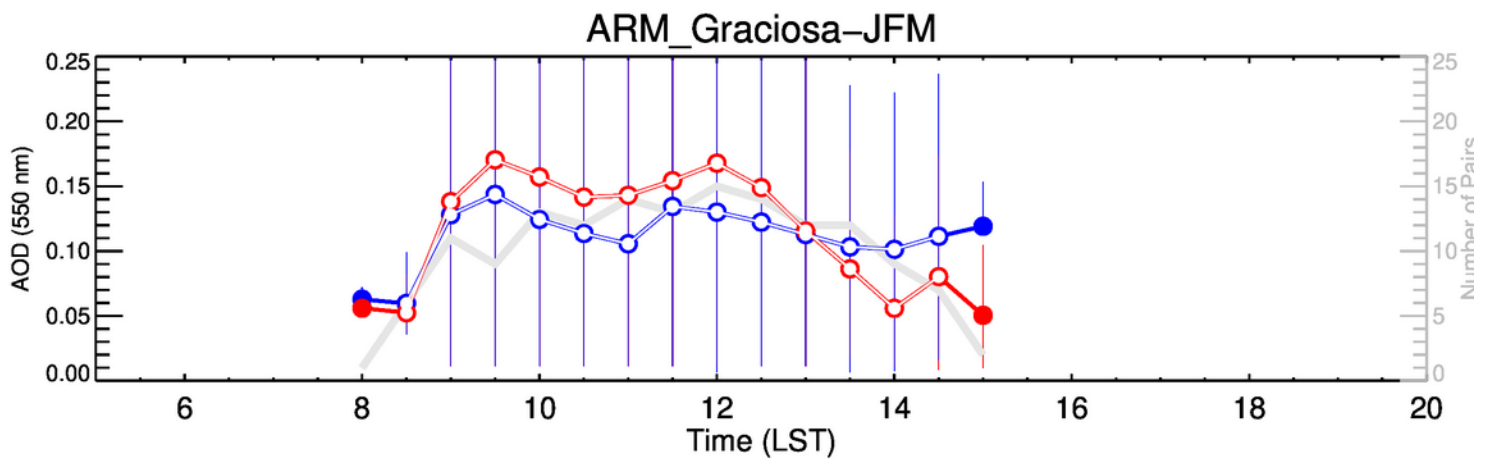

### ARM\_SGP-AMJ

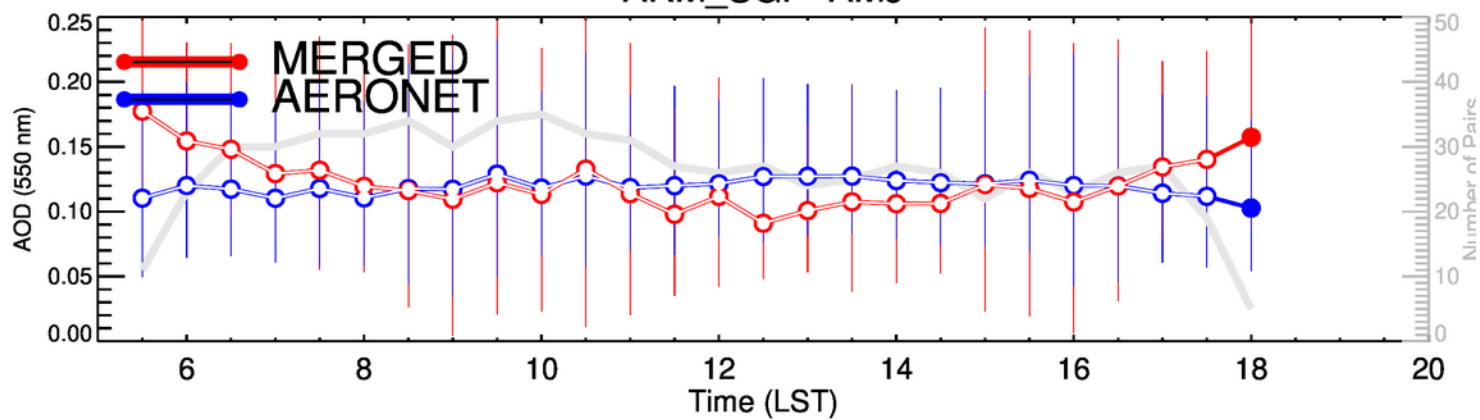

### ARM\_SGP-JAS

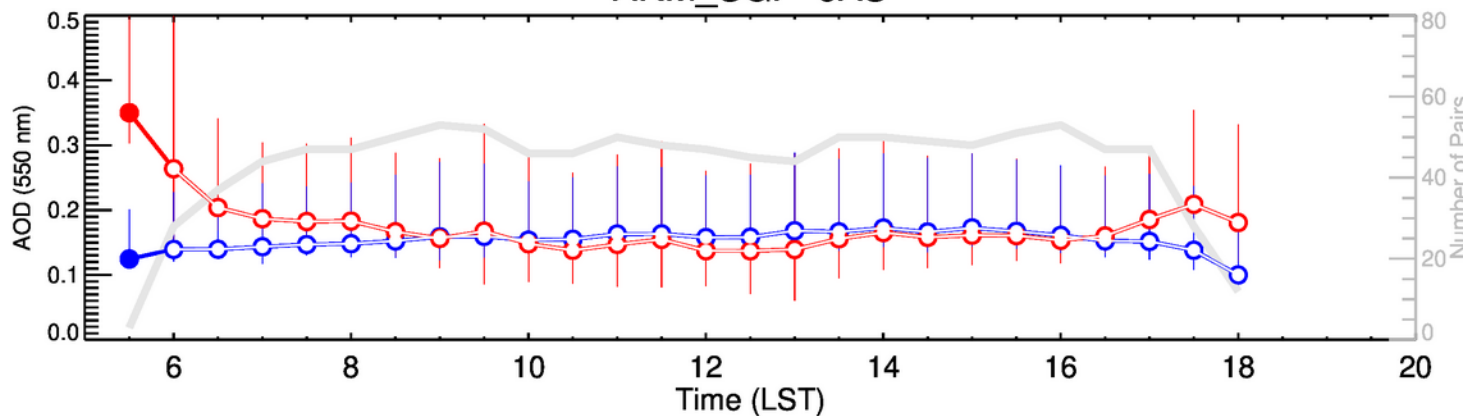

### ARM\_SGP-OND

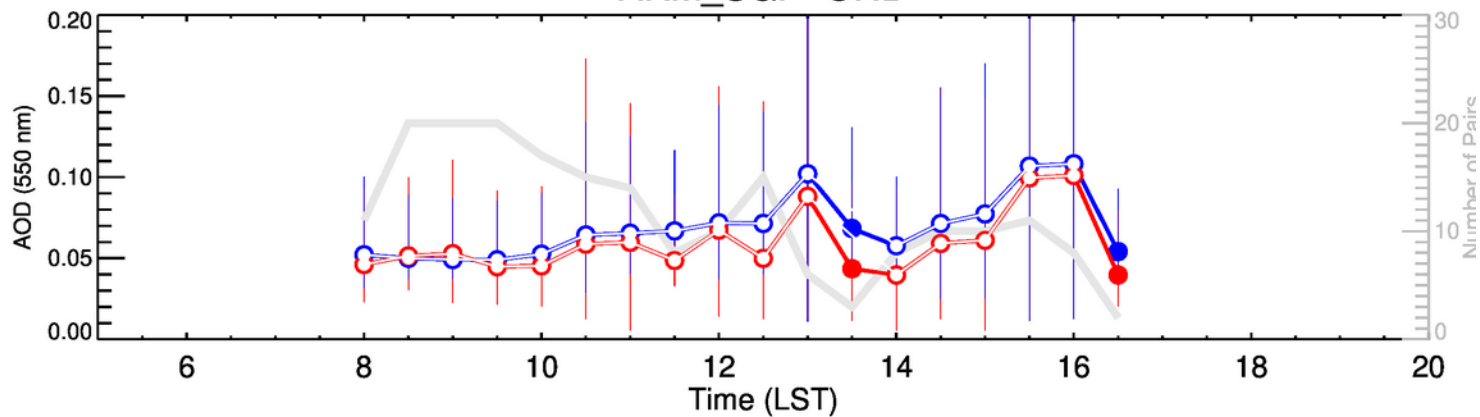

### ARM\_SGP-JFM

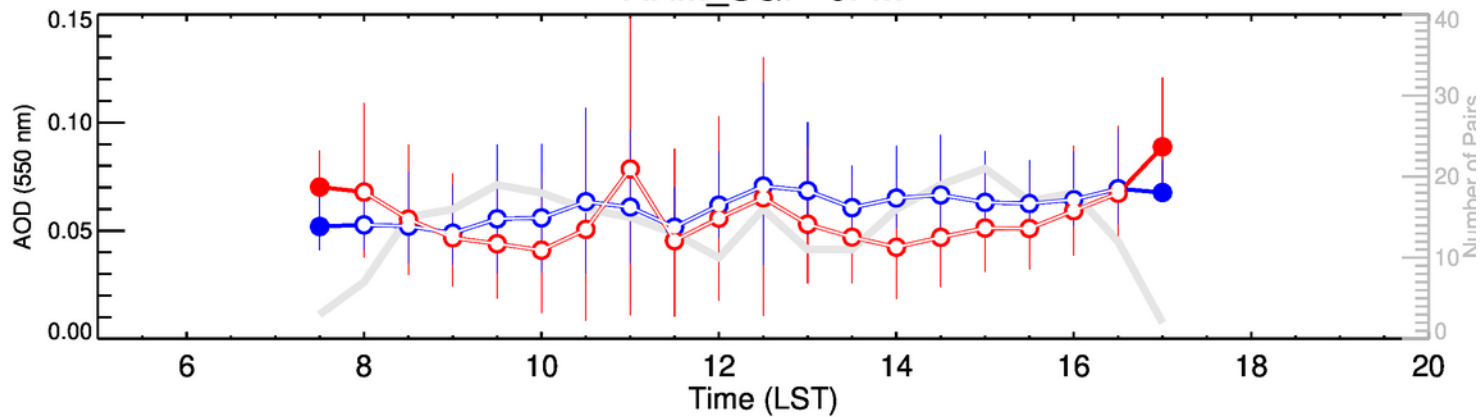

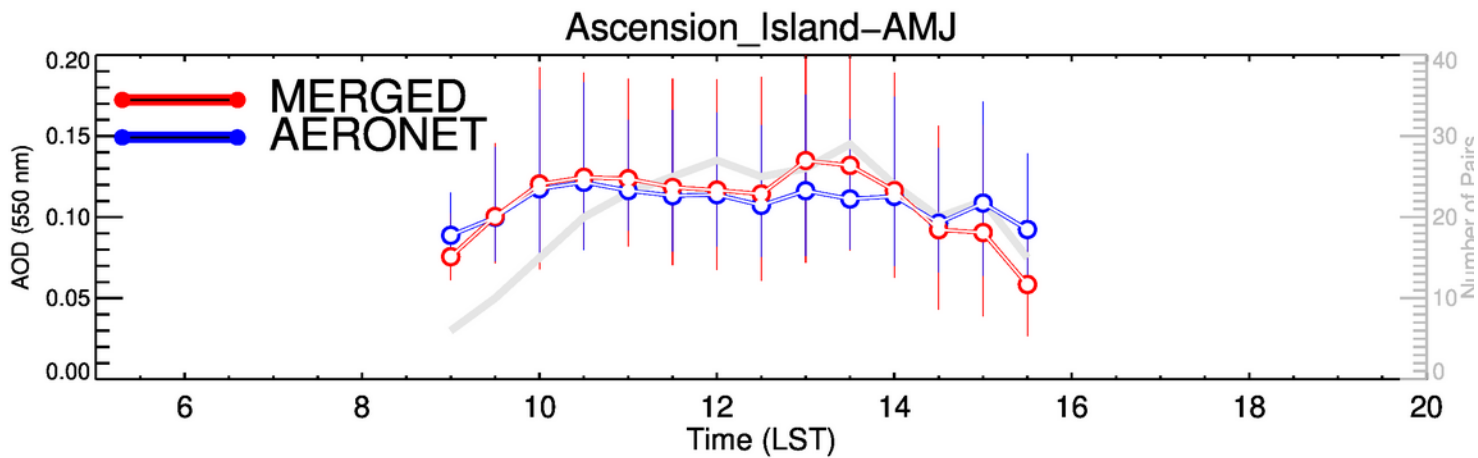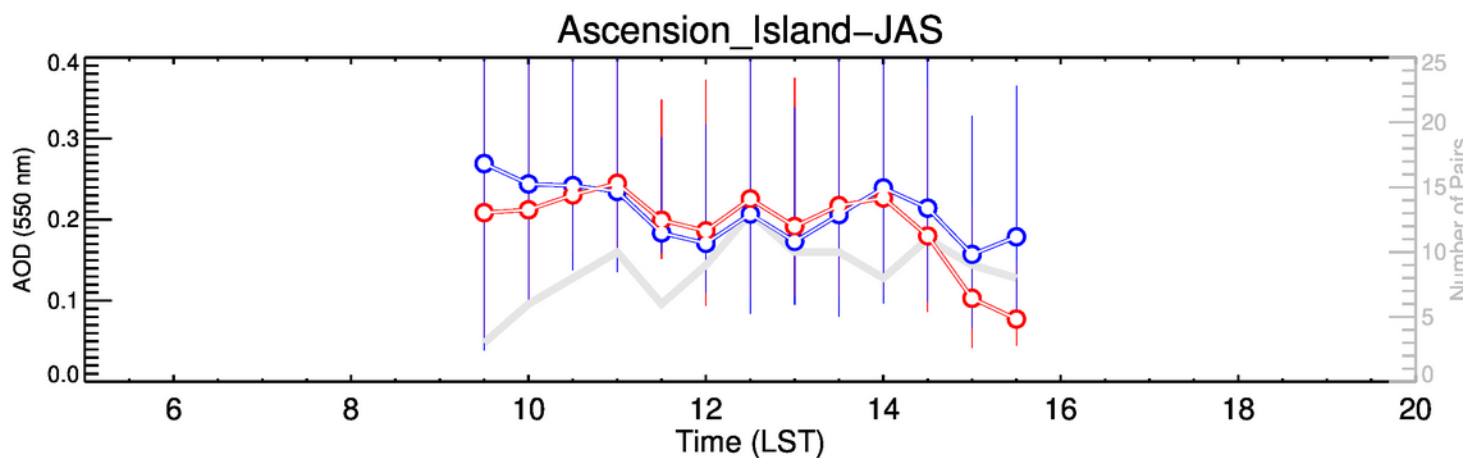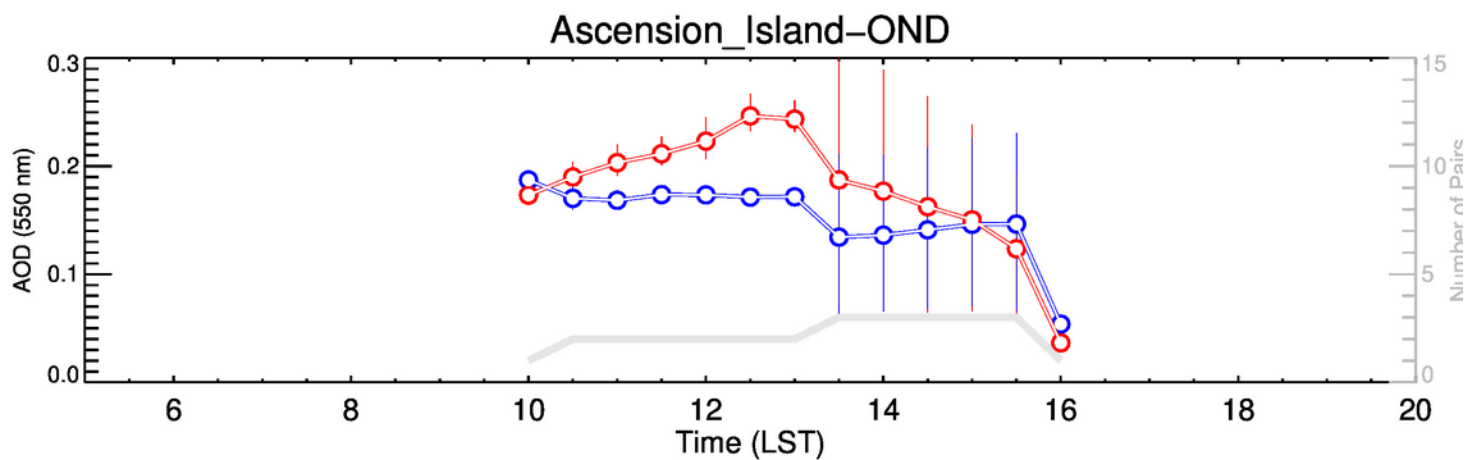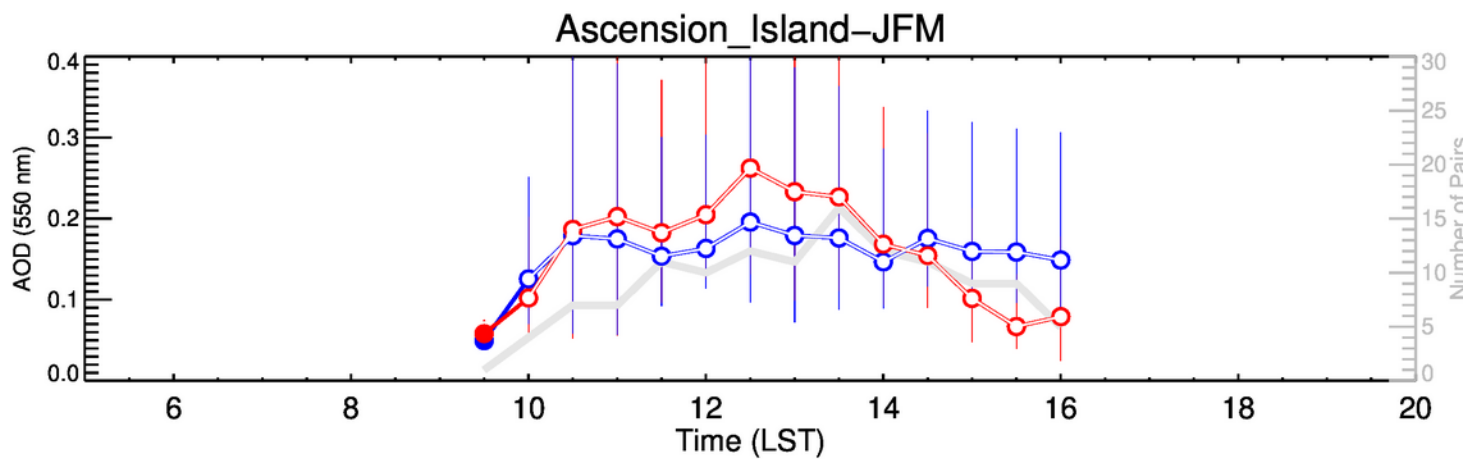

### Bakersfield-AMJ

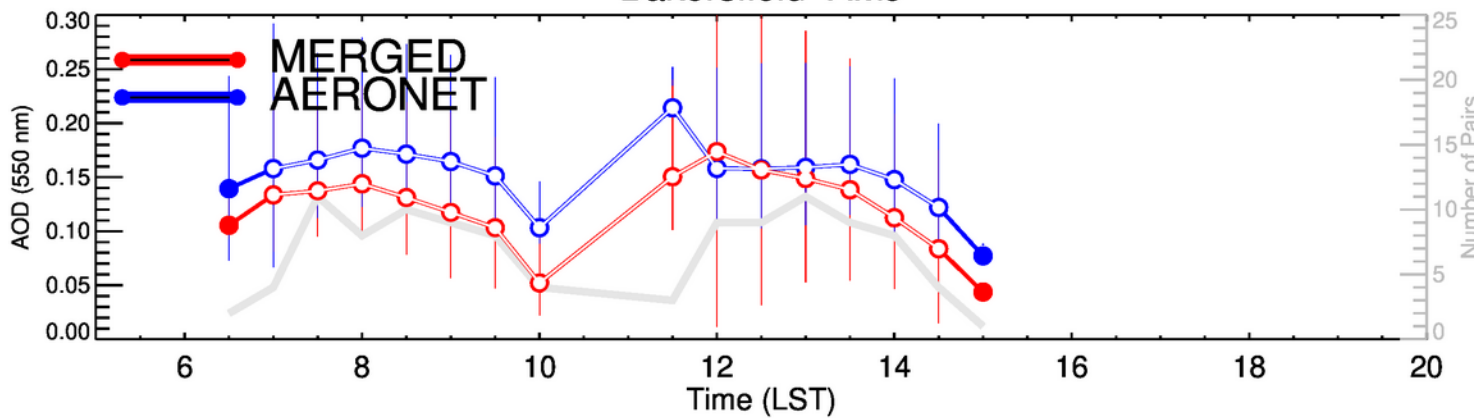

### Bakersfield-JAS

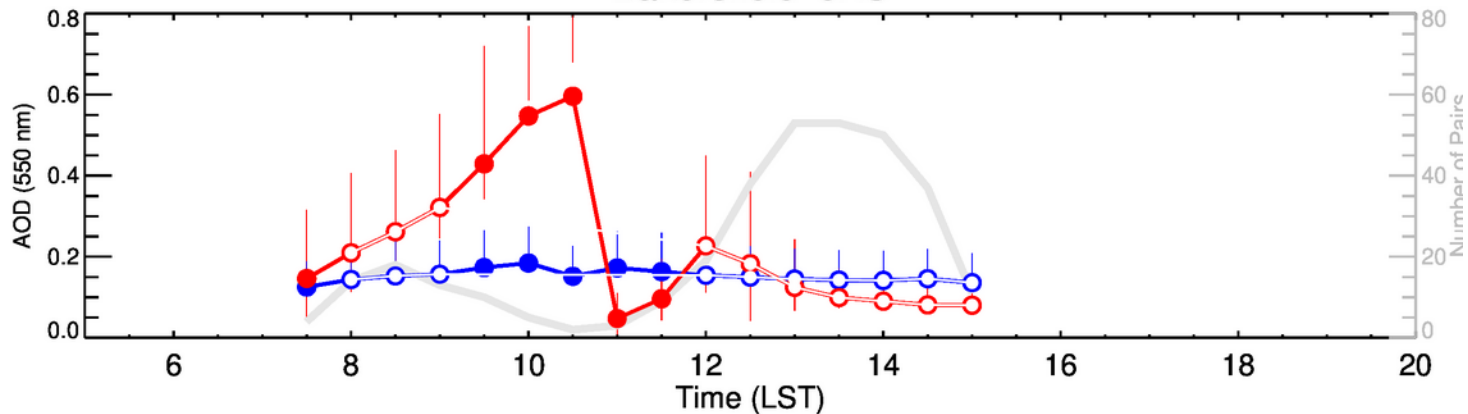

### Bakersfield-OND

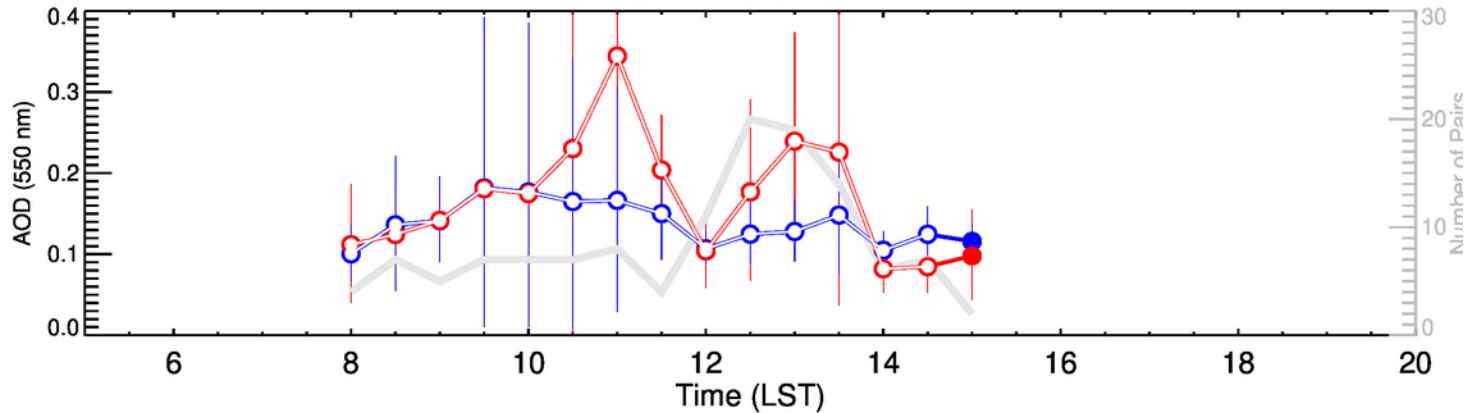

### Bakersfield-JFM

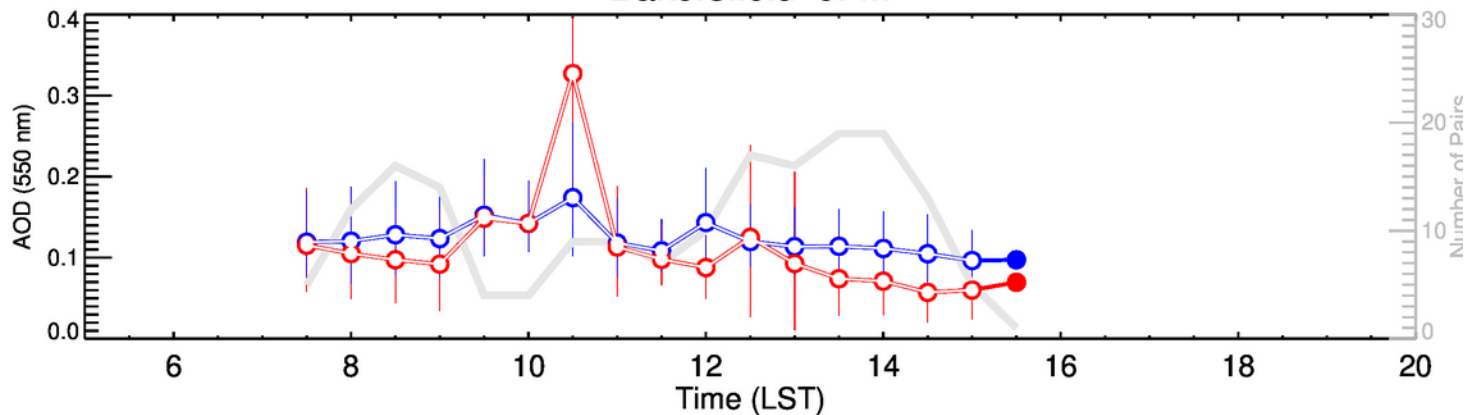

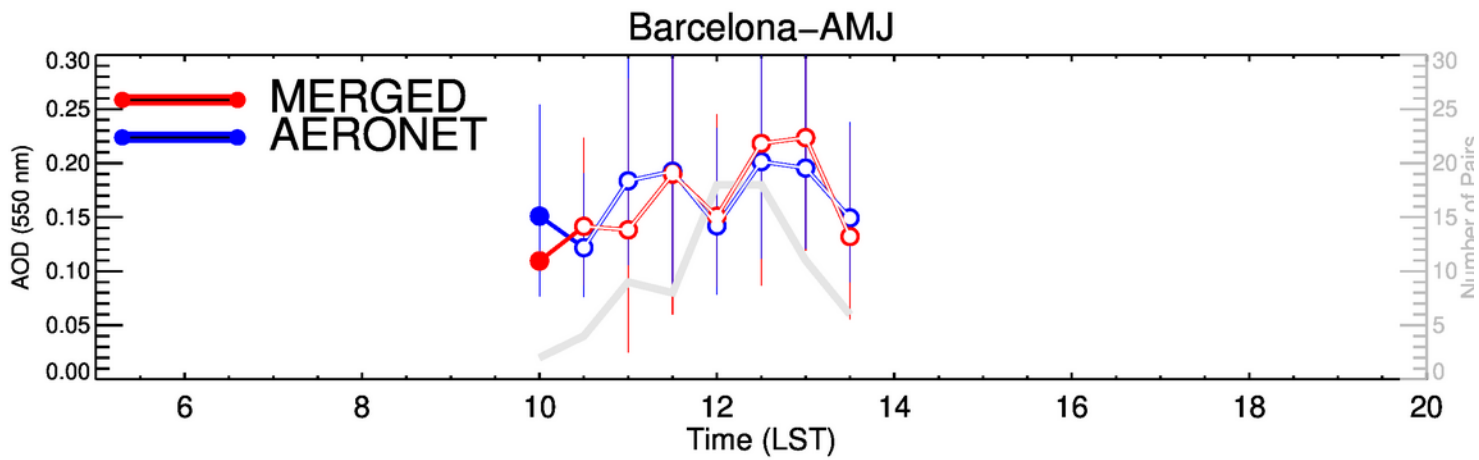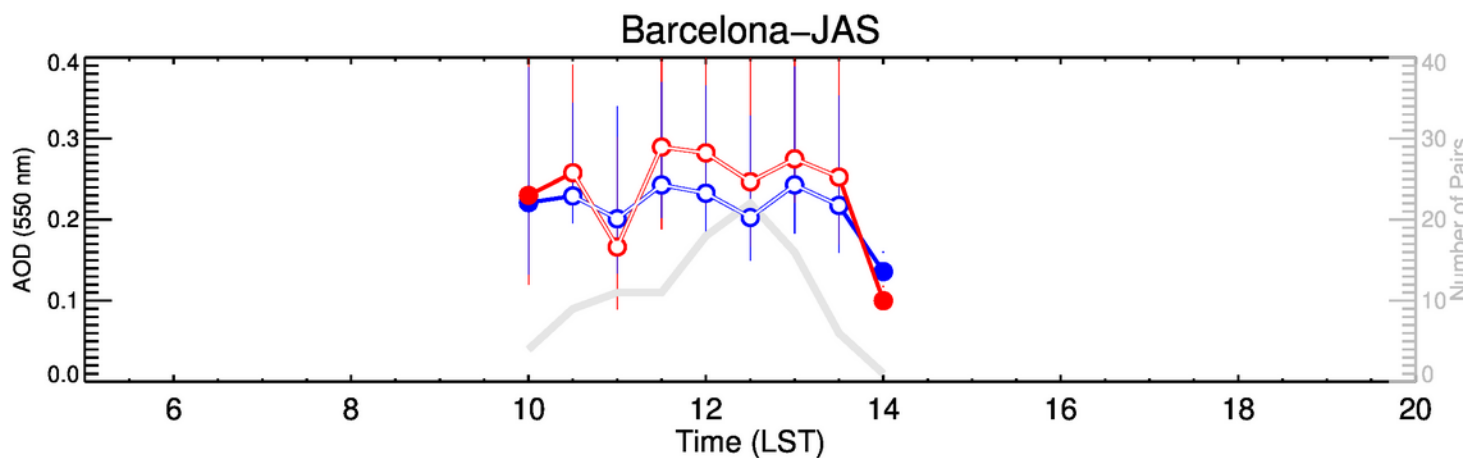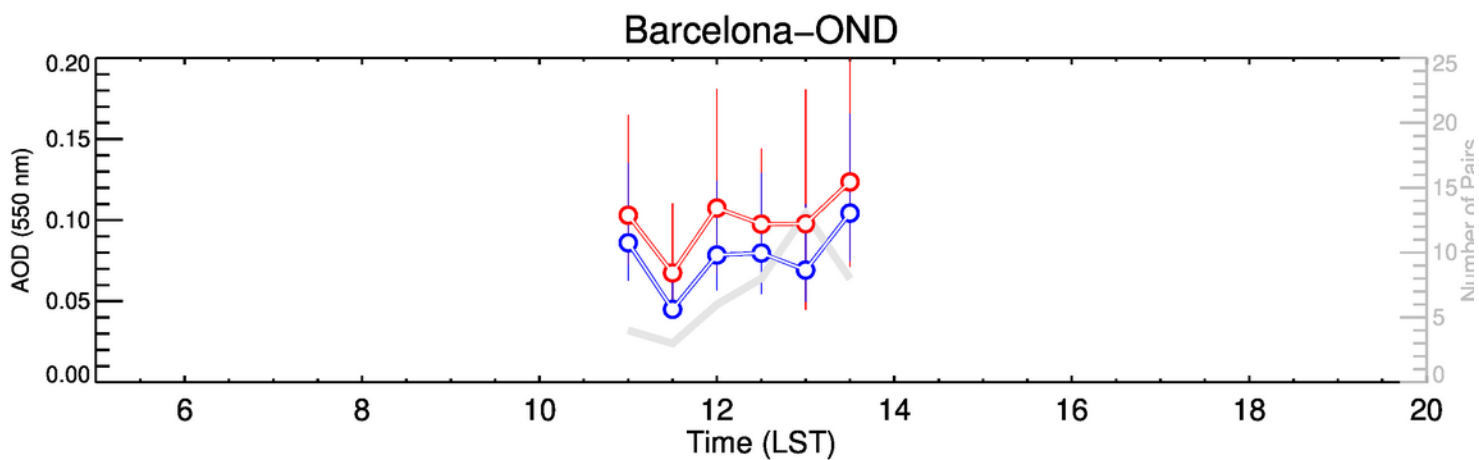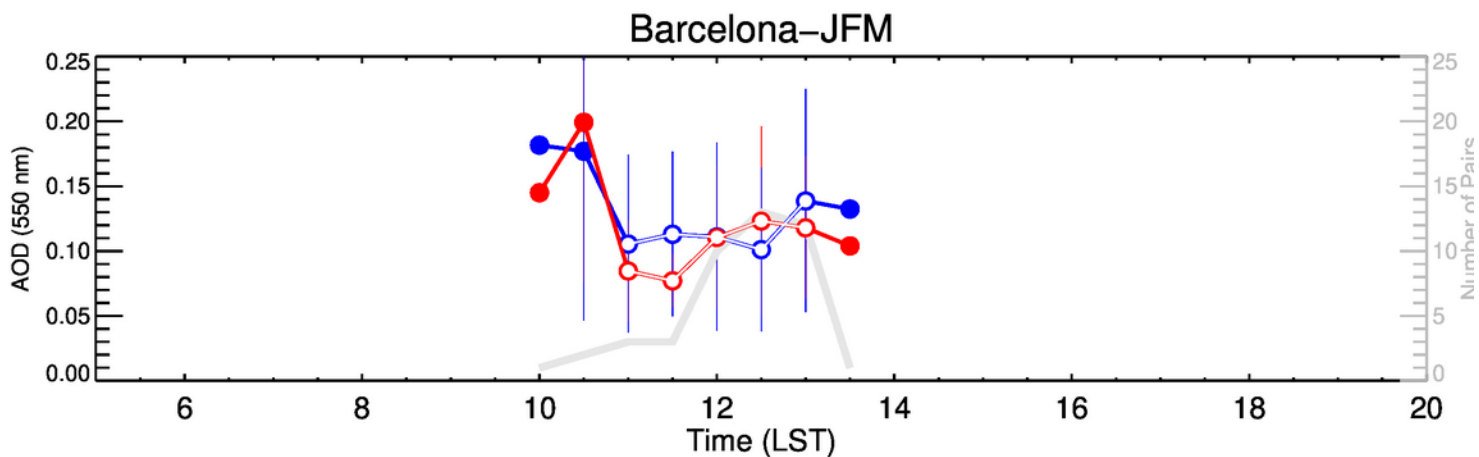



### Beijing-CAMS-AMJ

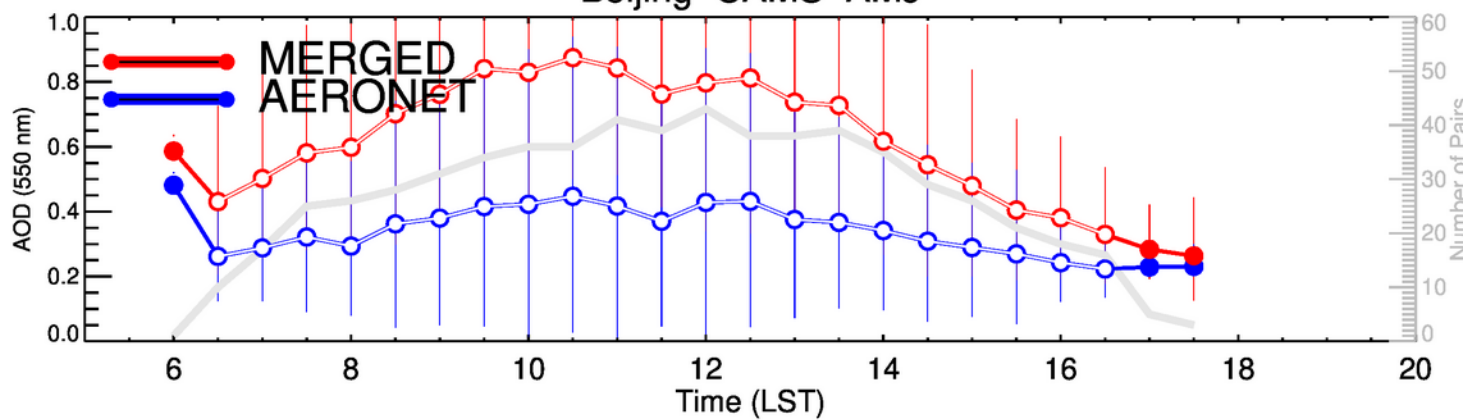

### Beijing-CAMS-JAS

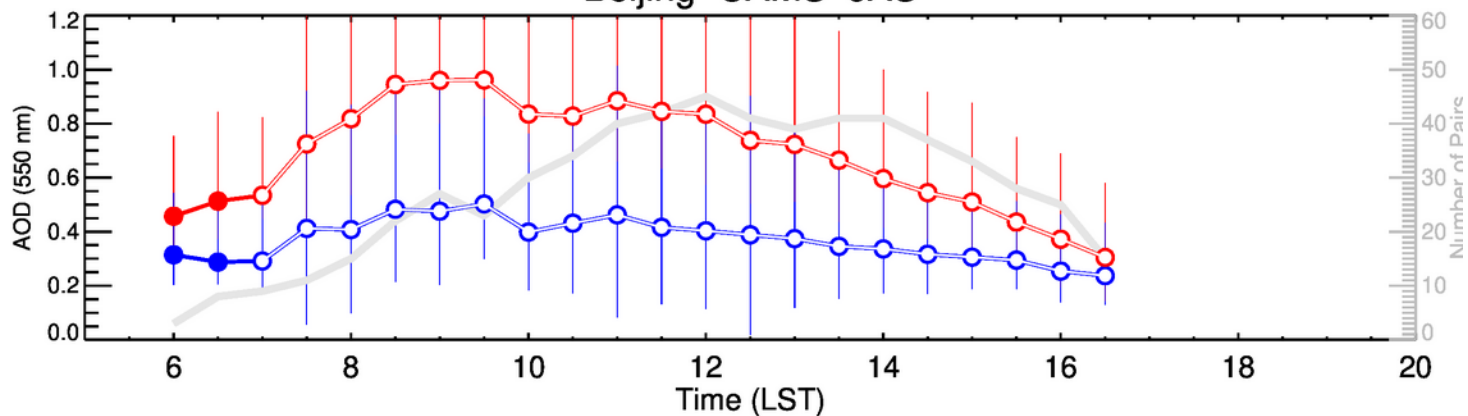

### Beijing-CAMS-OND

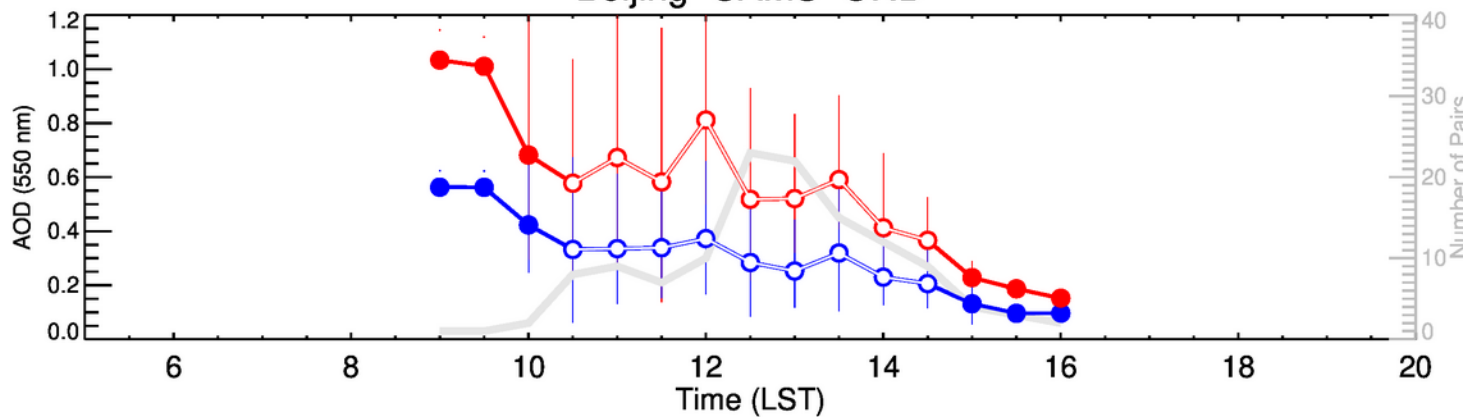

### Beijing-CAMS-JFM

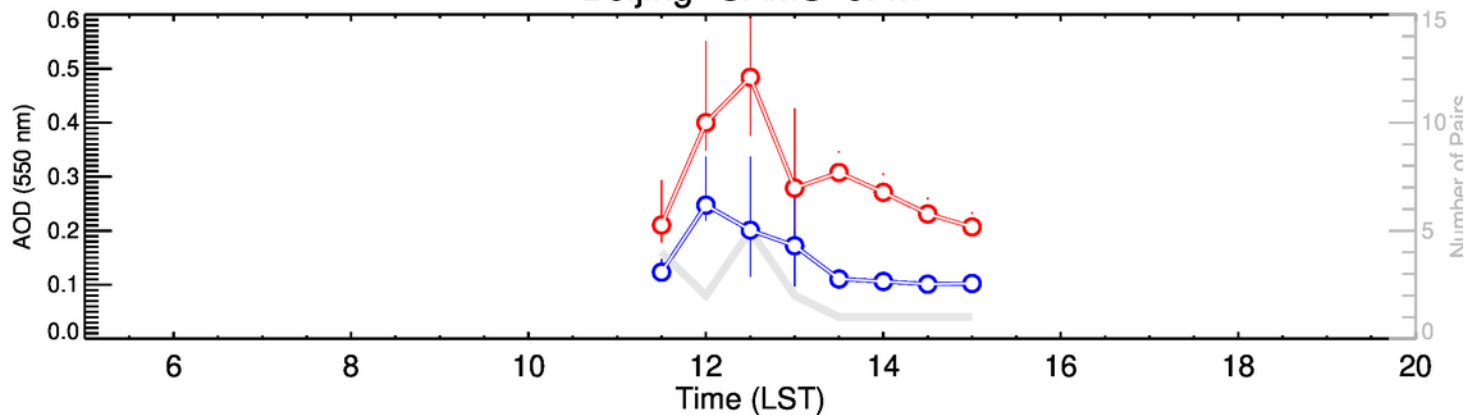

### BONDVILLE-AMJ

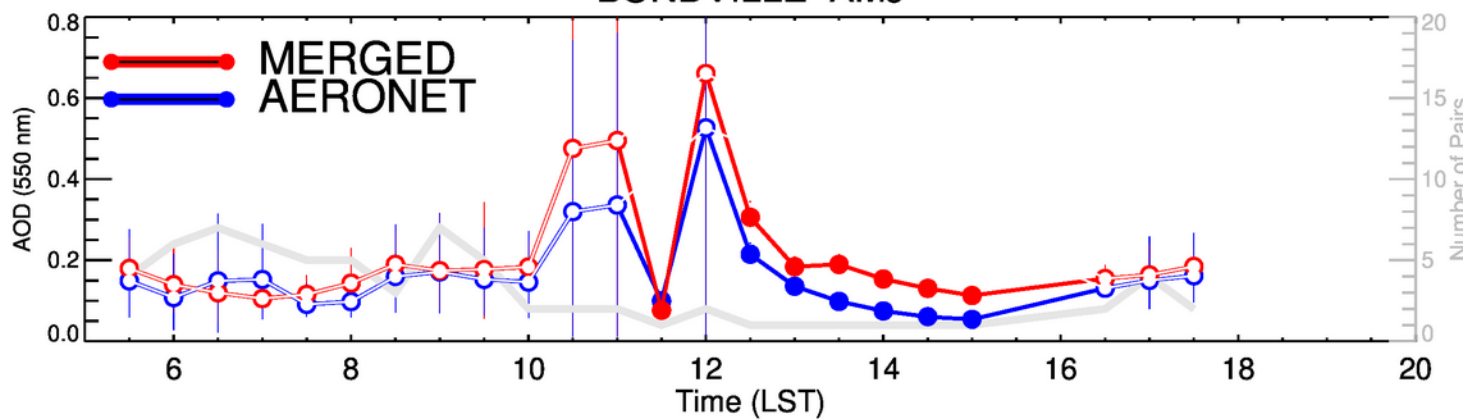

### BONDVILLE-OND

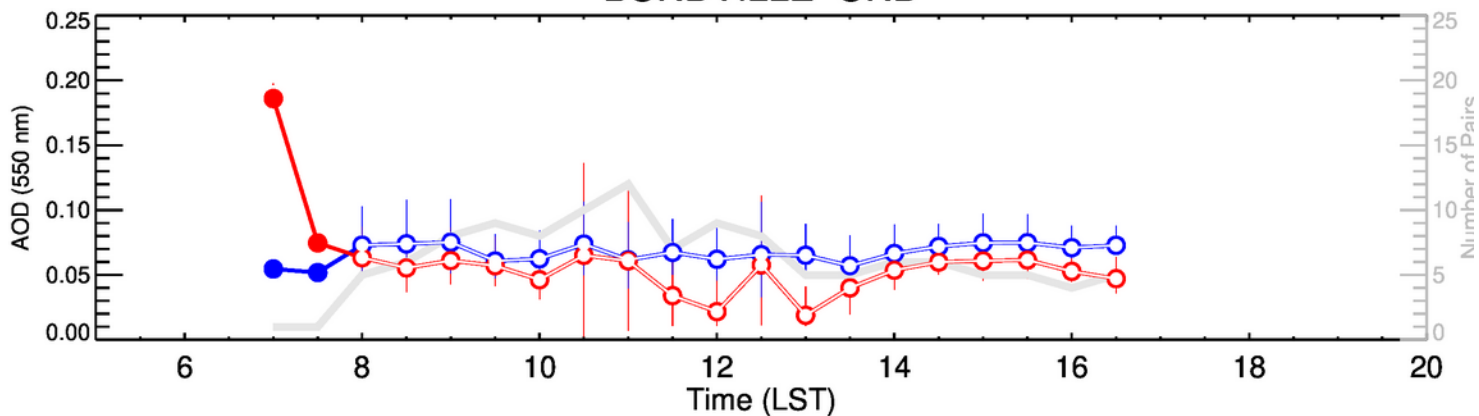

### BONDVILLE-JFM

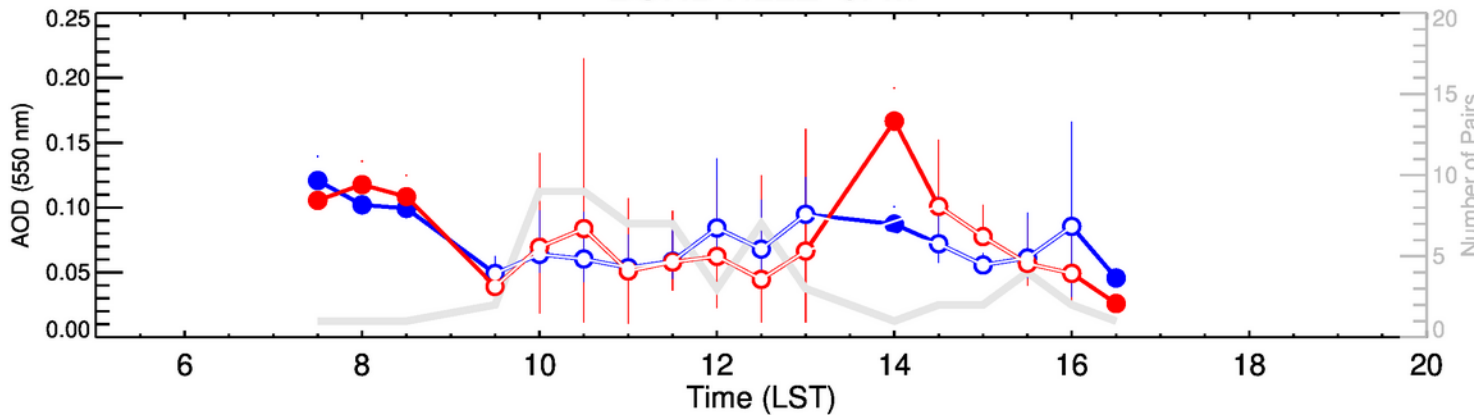

### Brookhaven-AMJ

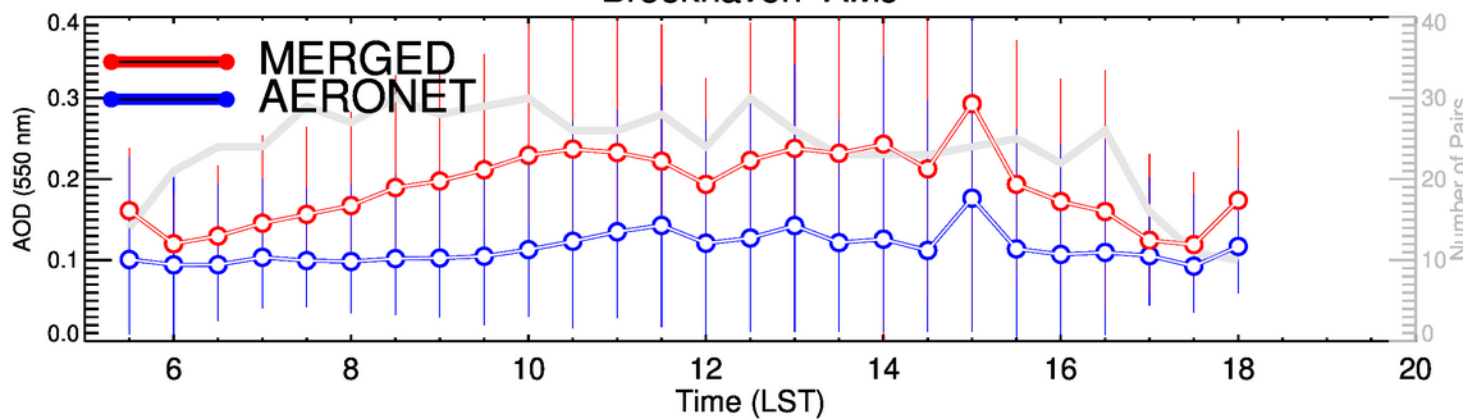

### Brookhaven-JAS

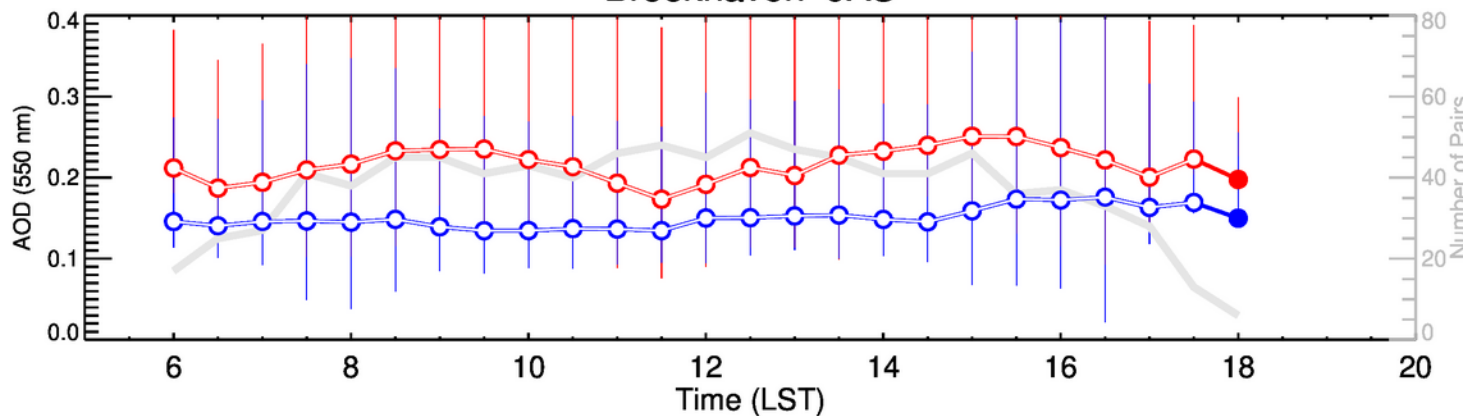

### Brookhaven-OND

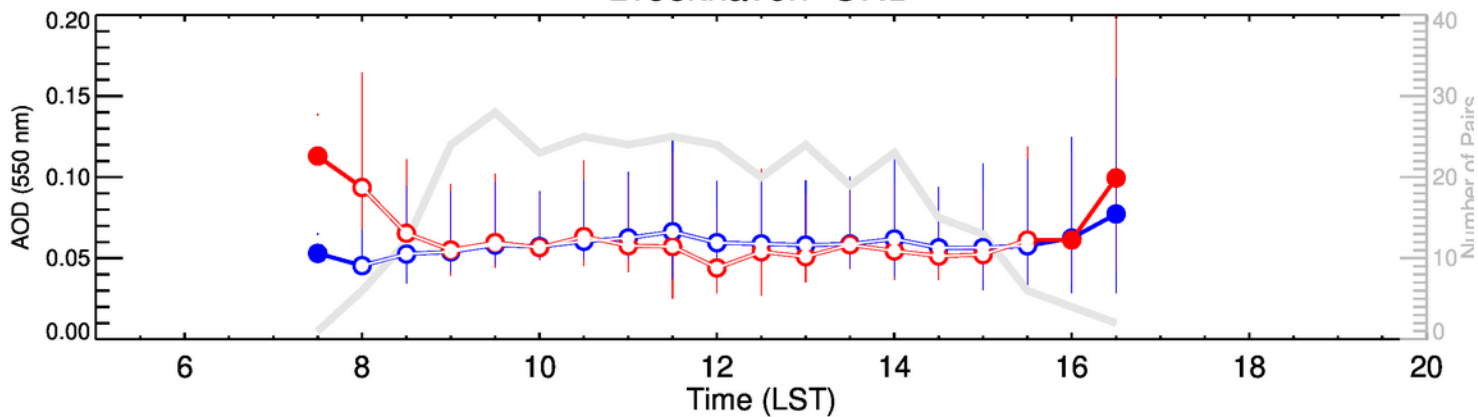

### Brookhaven-JFM

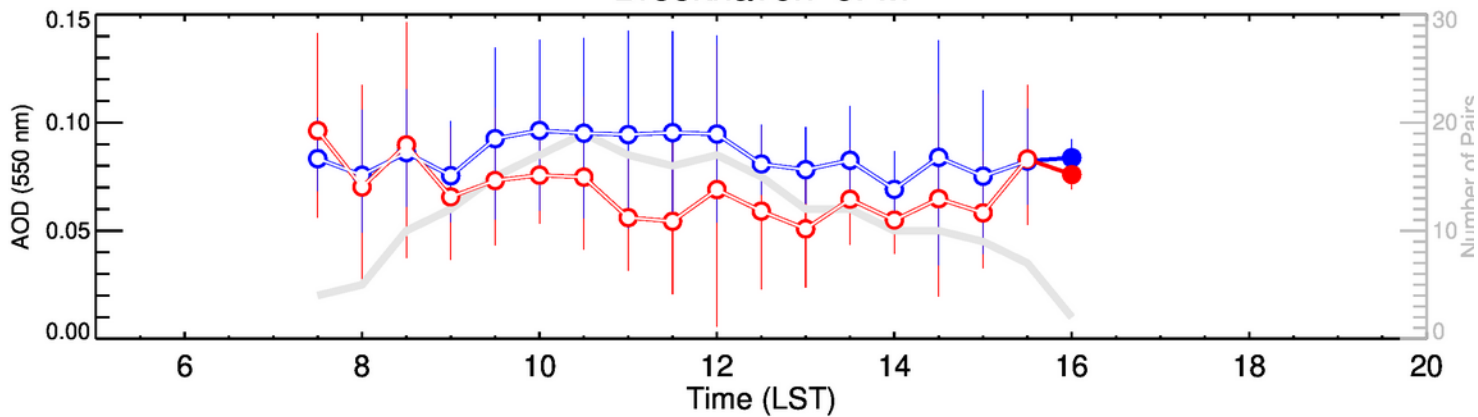

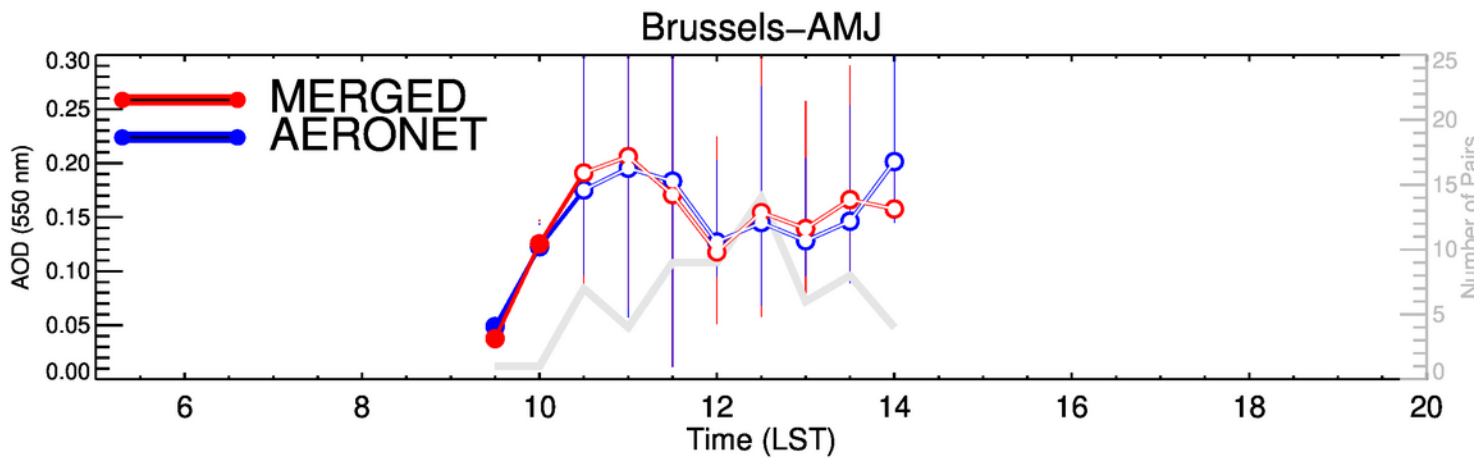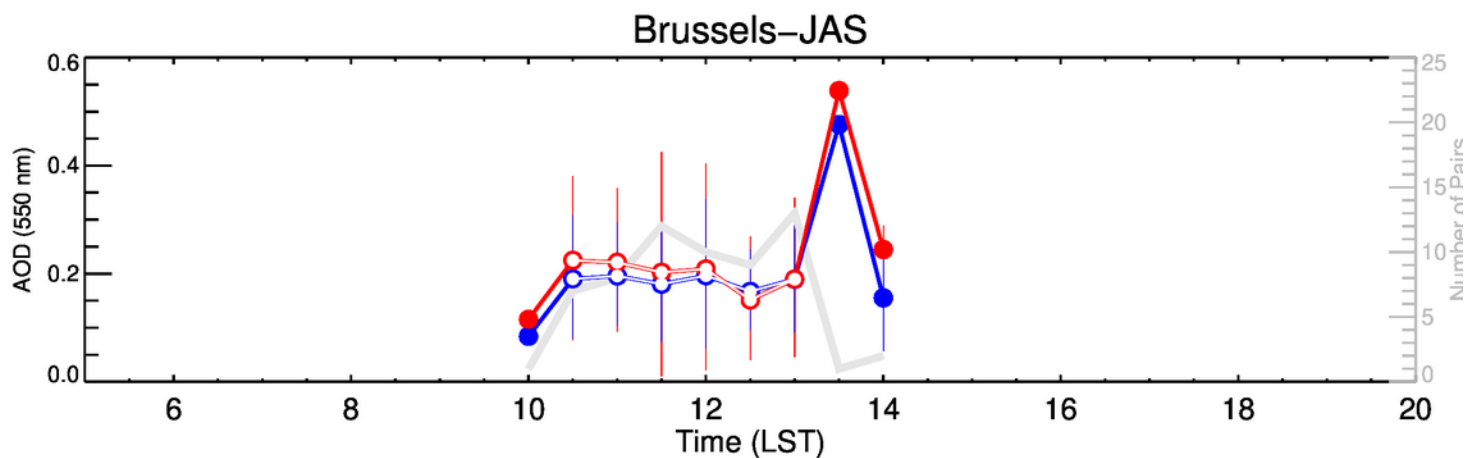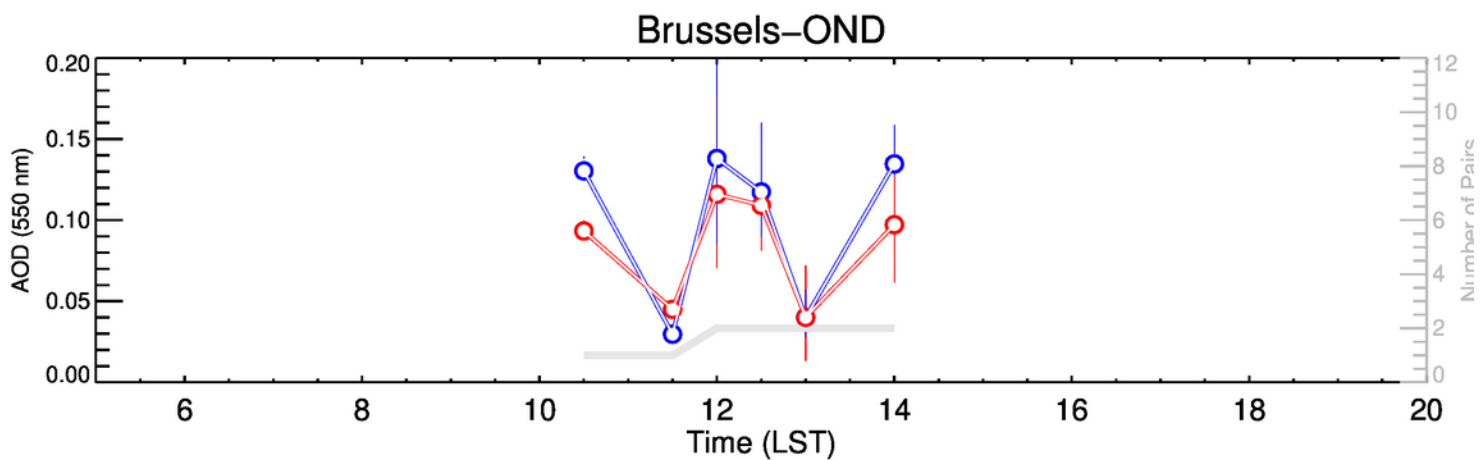

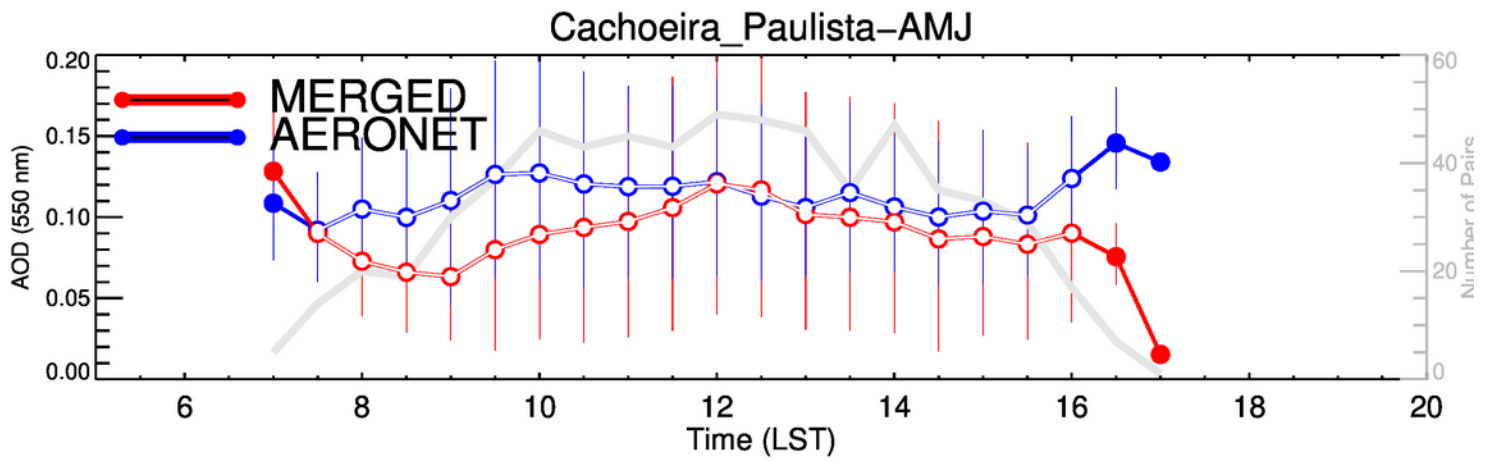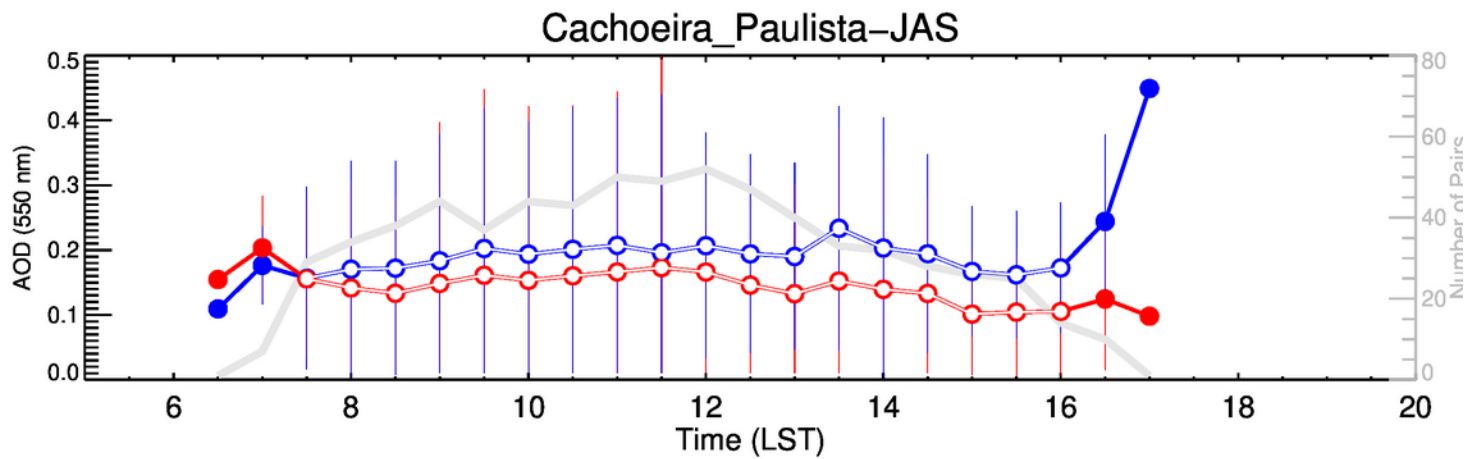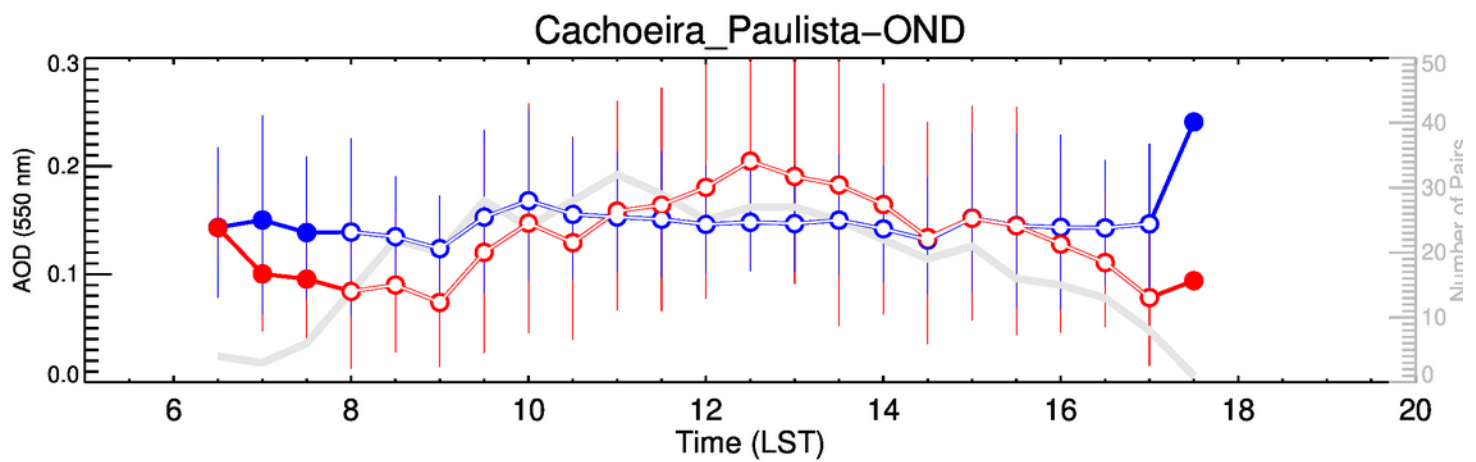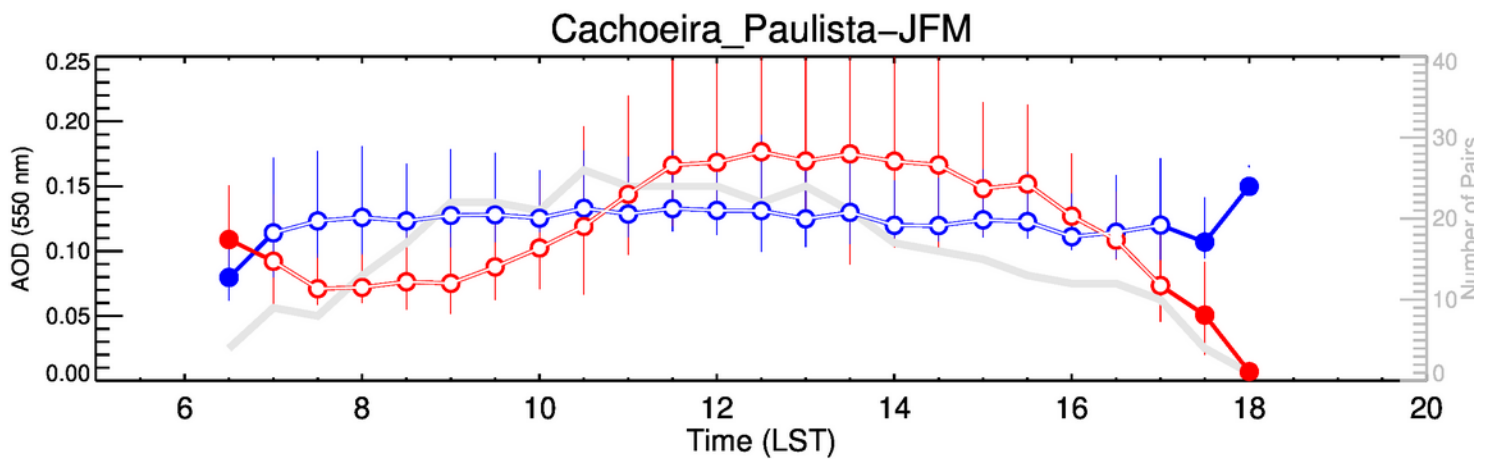

### CalTech-AMJ

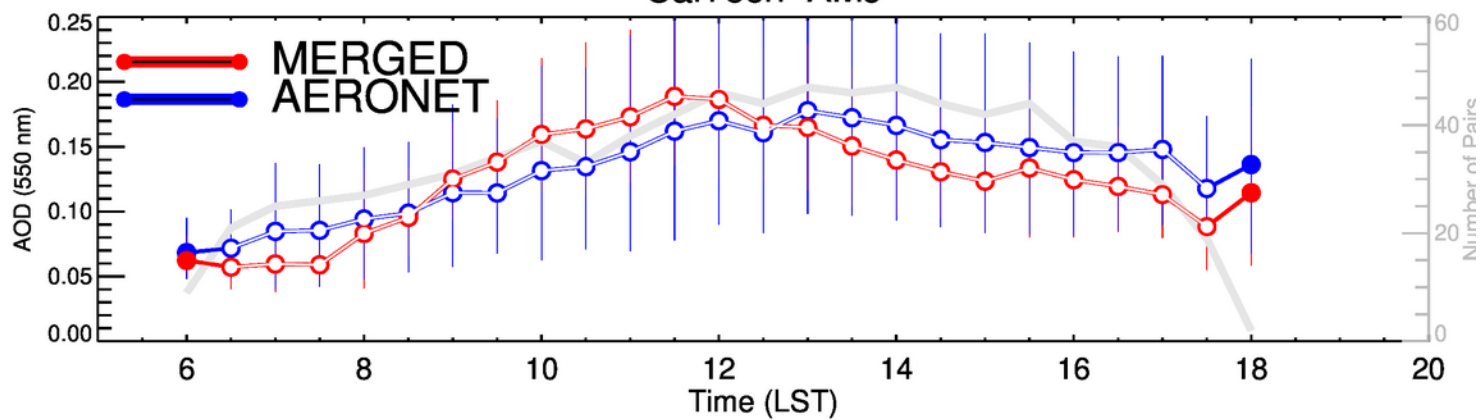

### CalTech-JAS

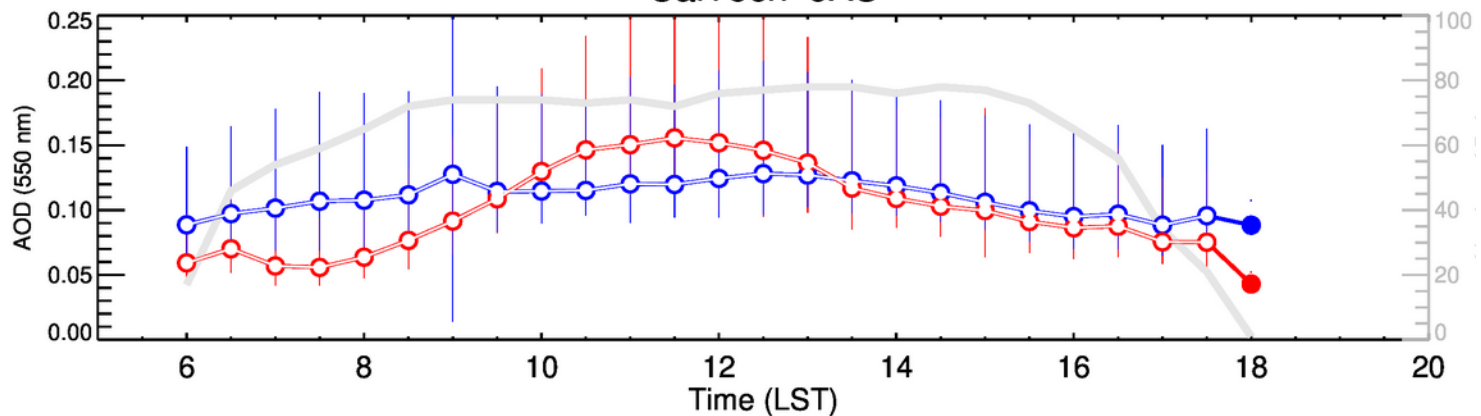

### CalTech-OND

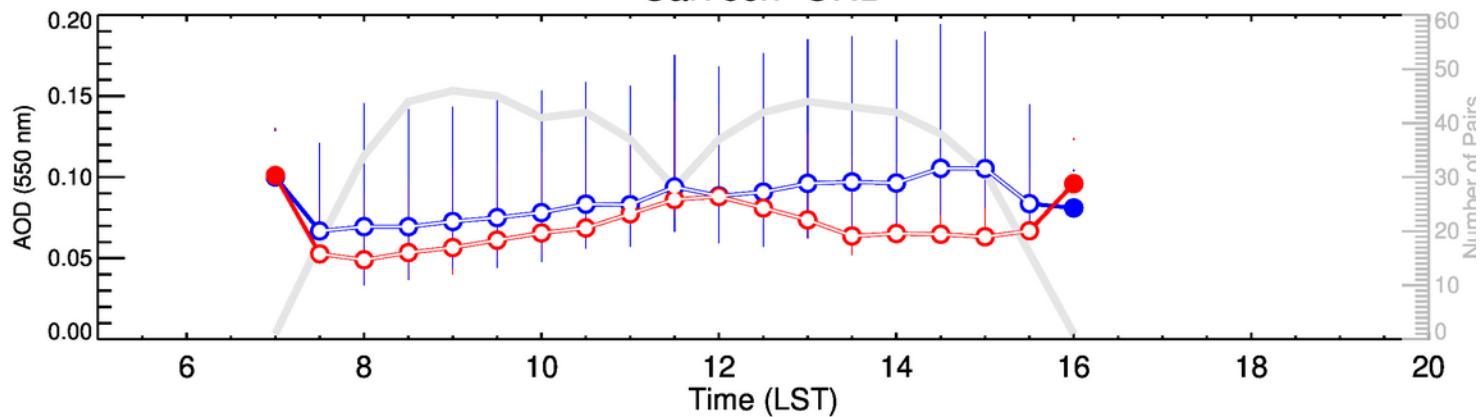

### CalTech-JFM

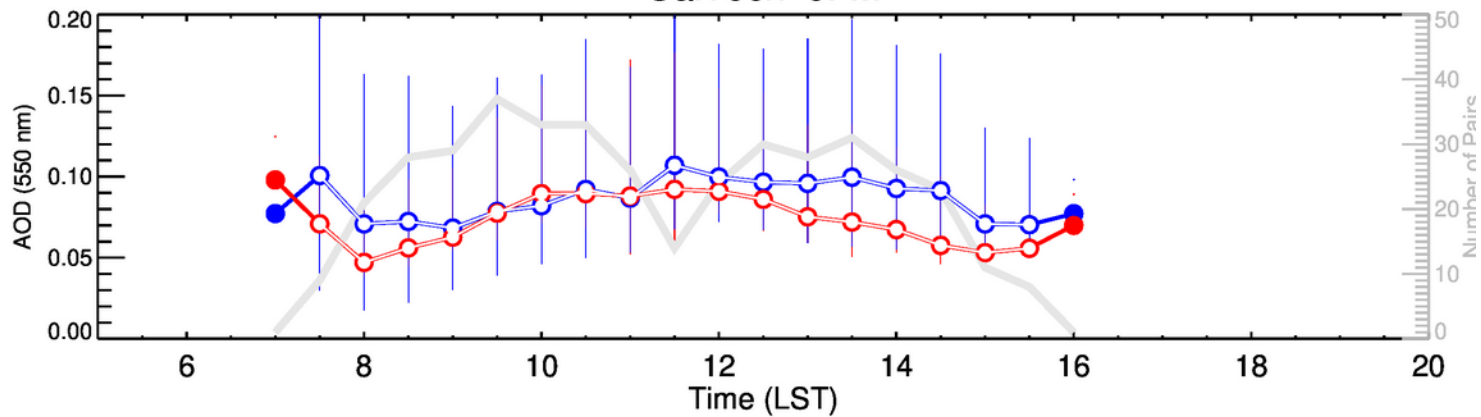

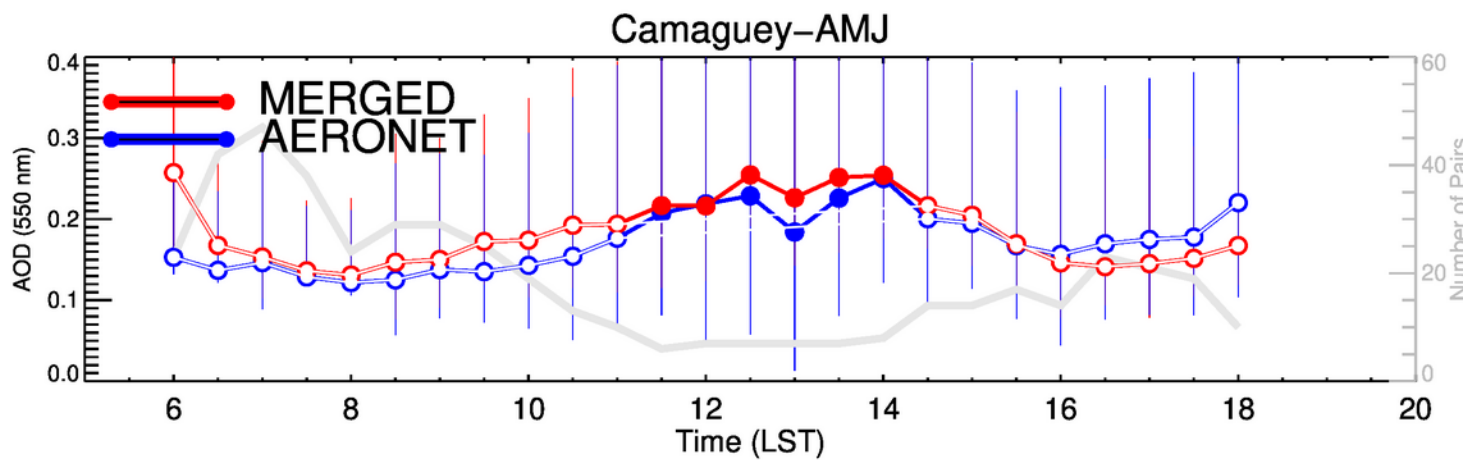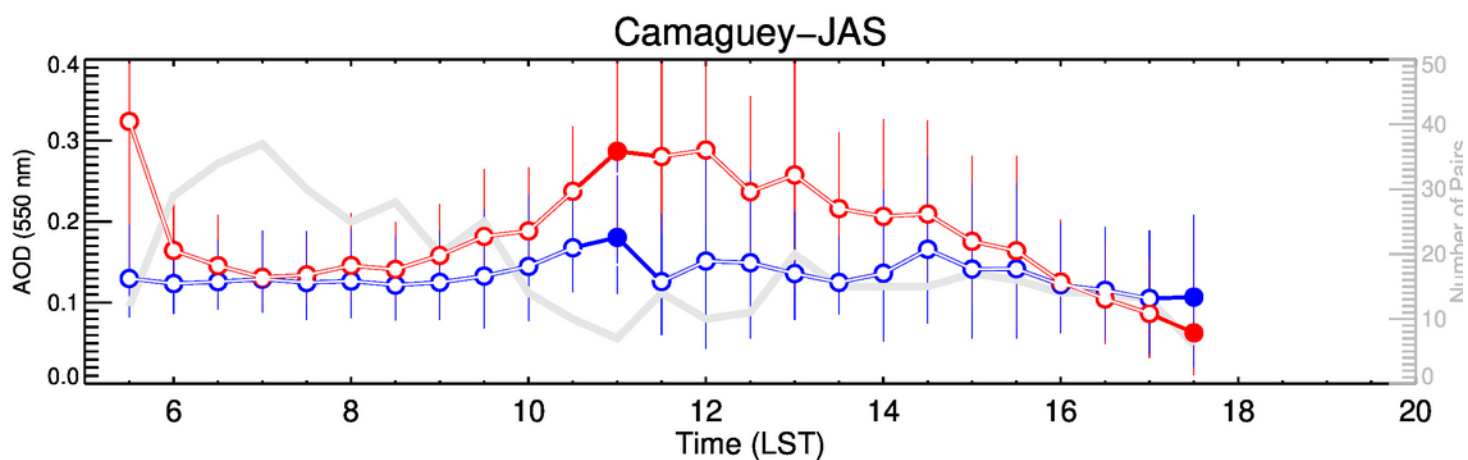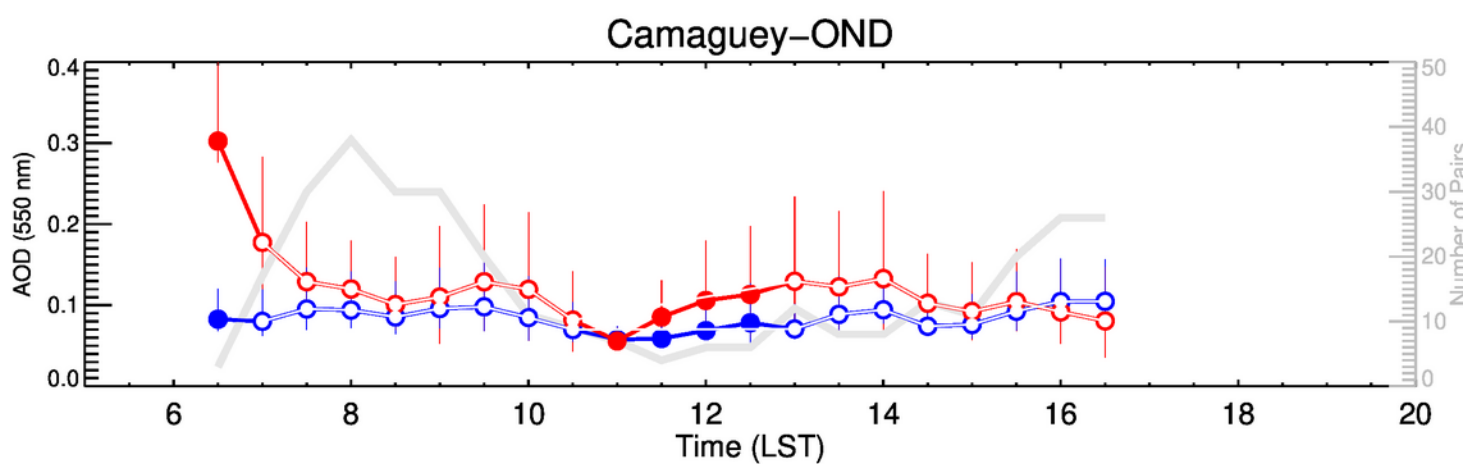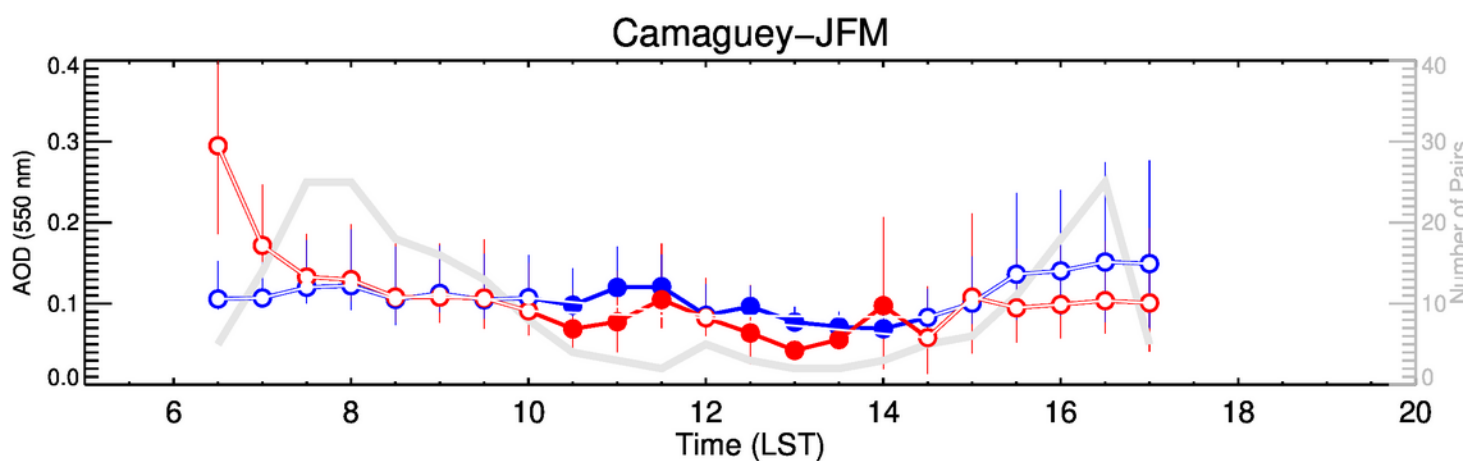

### Cape\_San\_Juan-AMJ

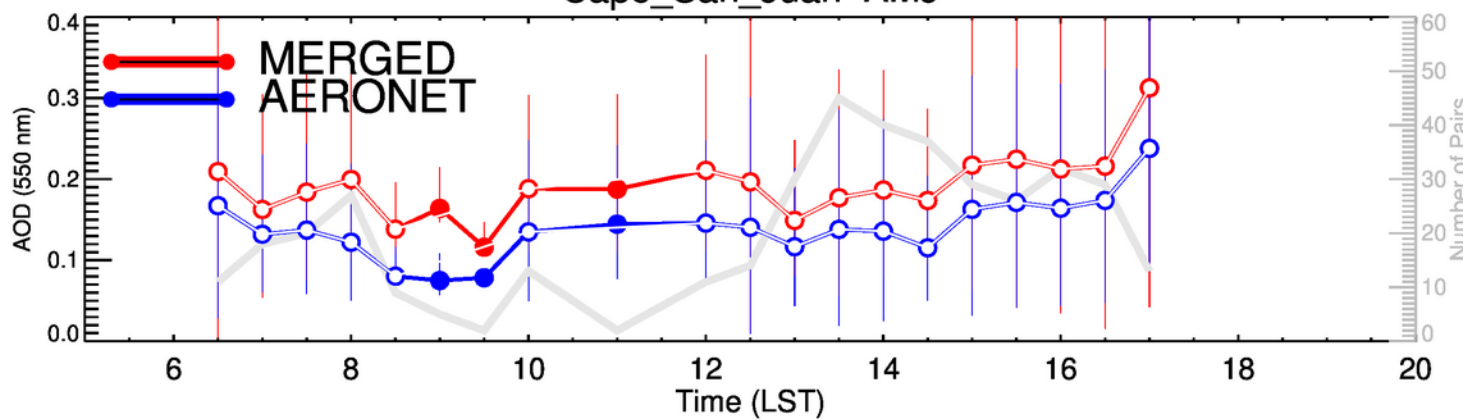

### Cape\_San\_Juan-JAS

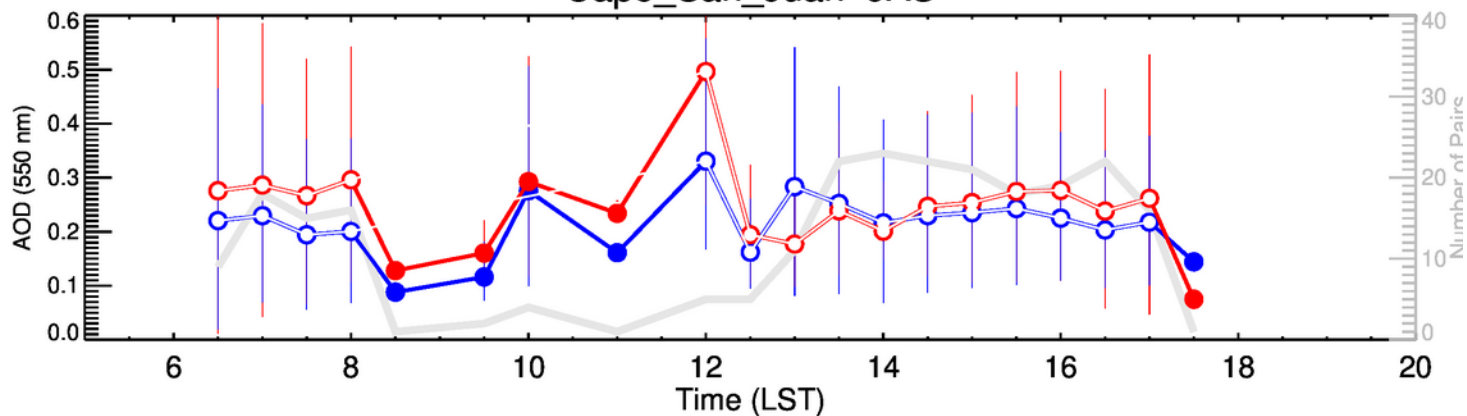

### Cape\_San\_Juan-OND

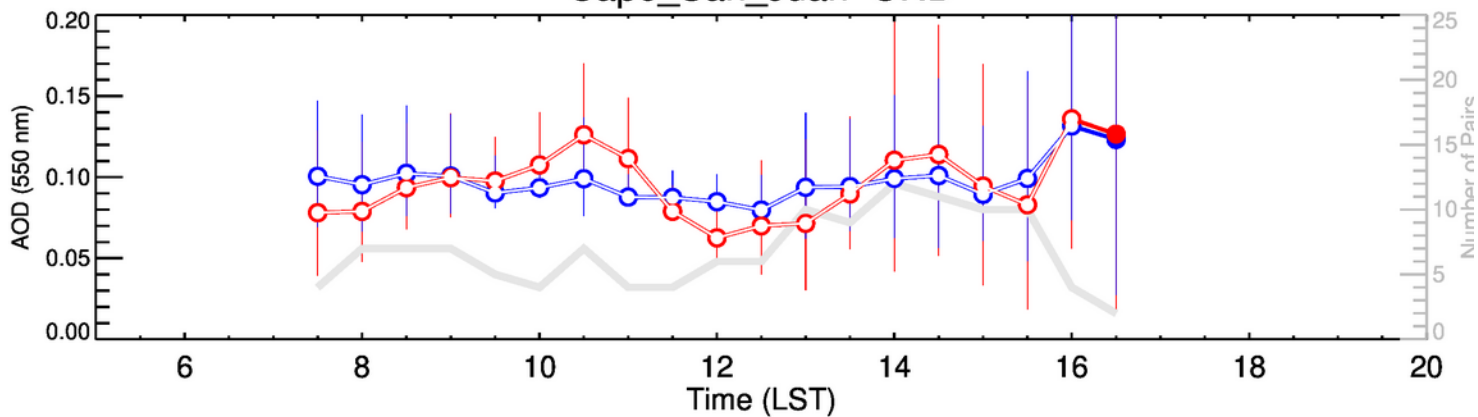

### Cape\_San\_Juan-JFM

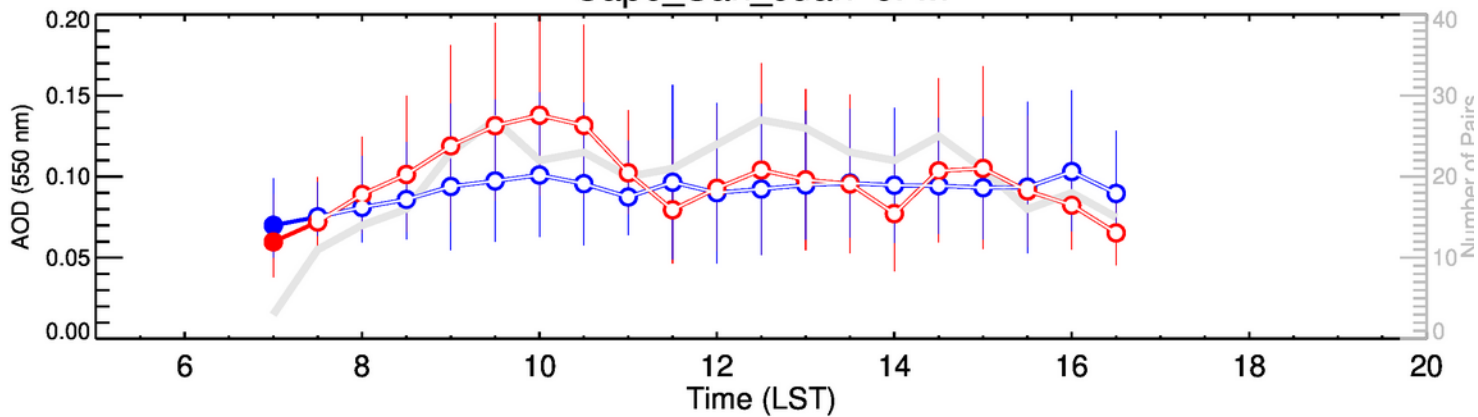



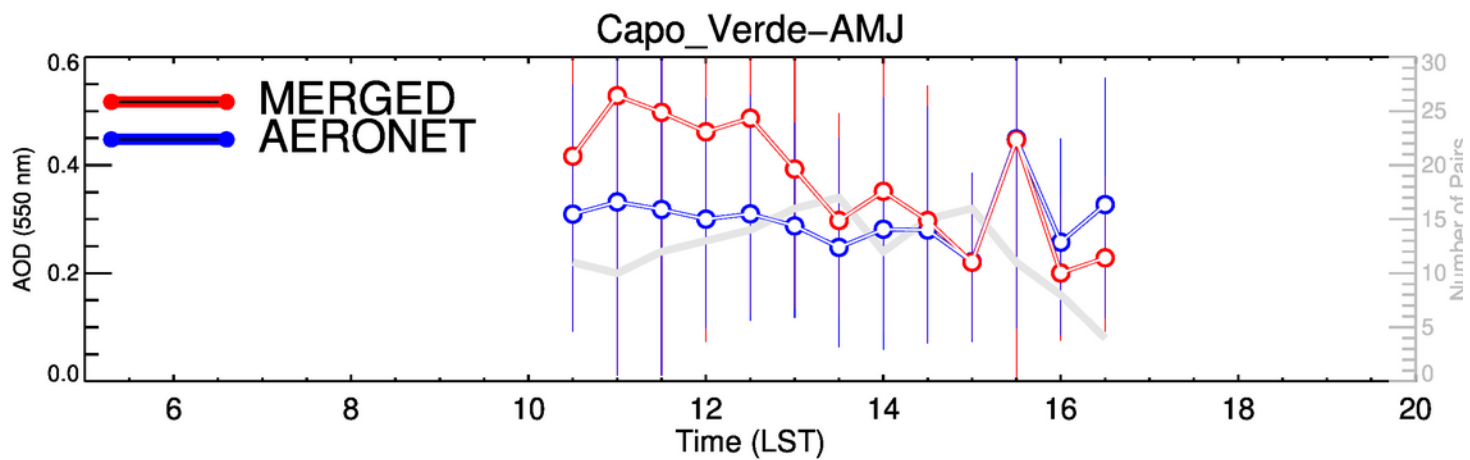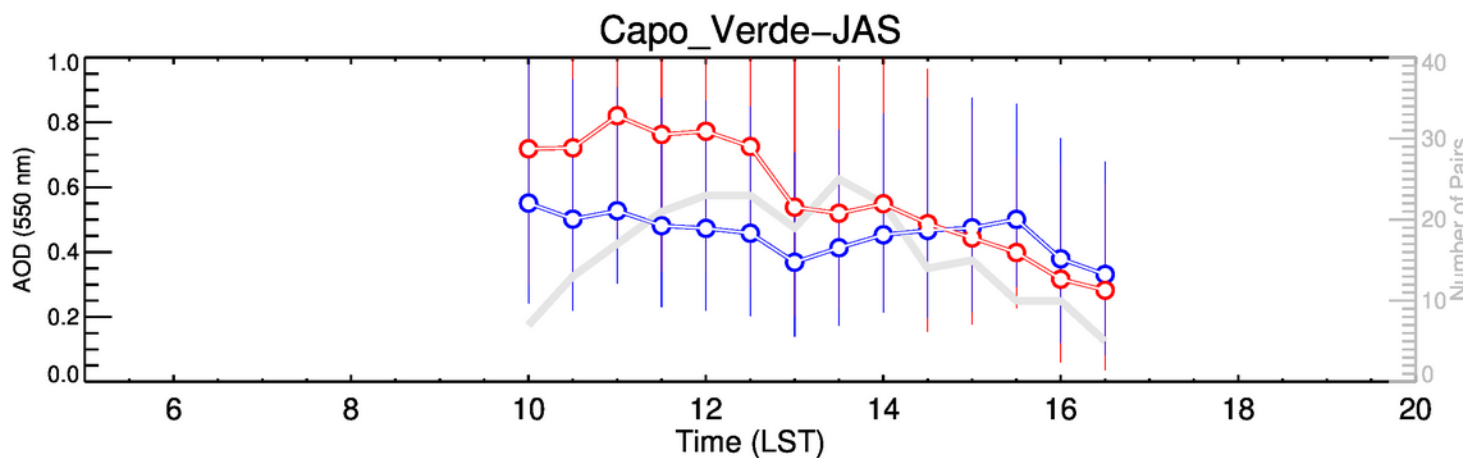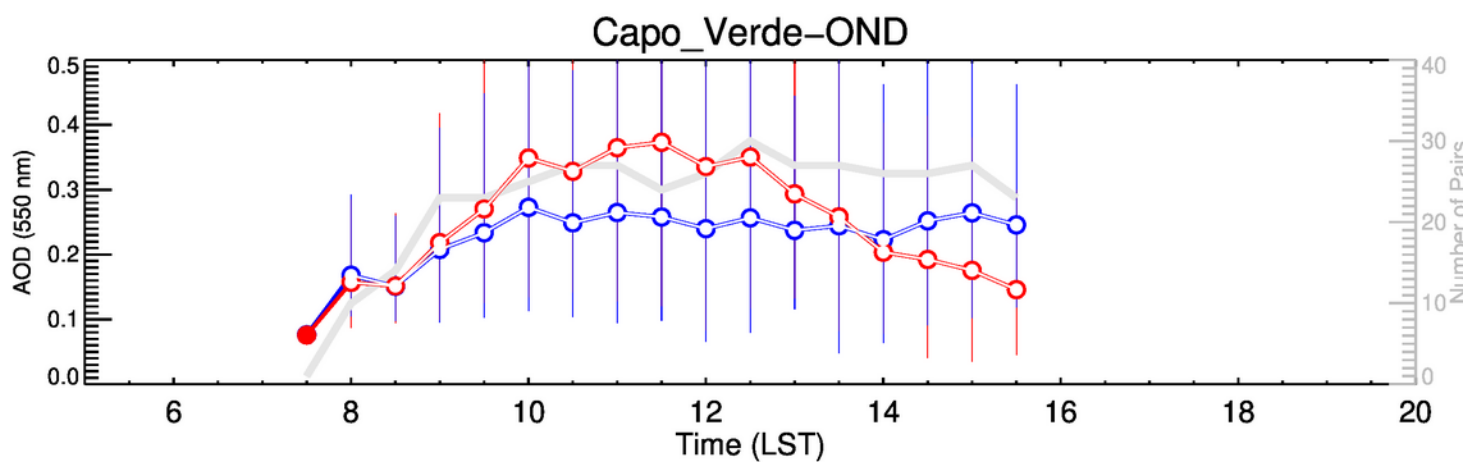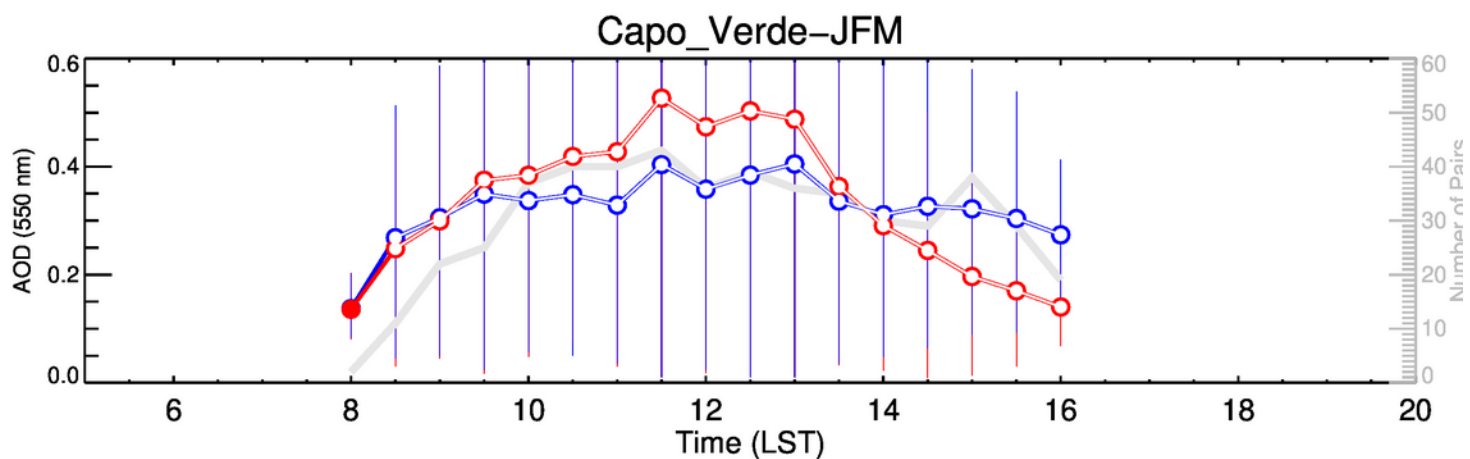

### CEILAP-BA-AMJ

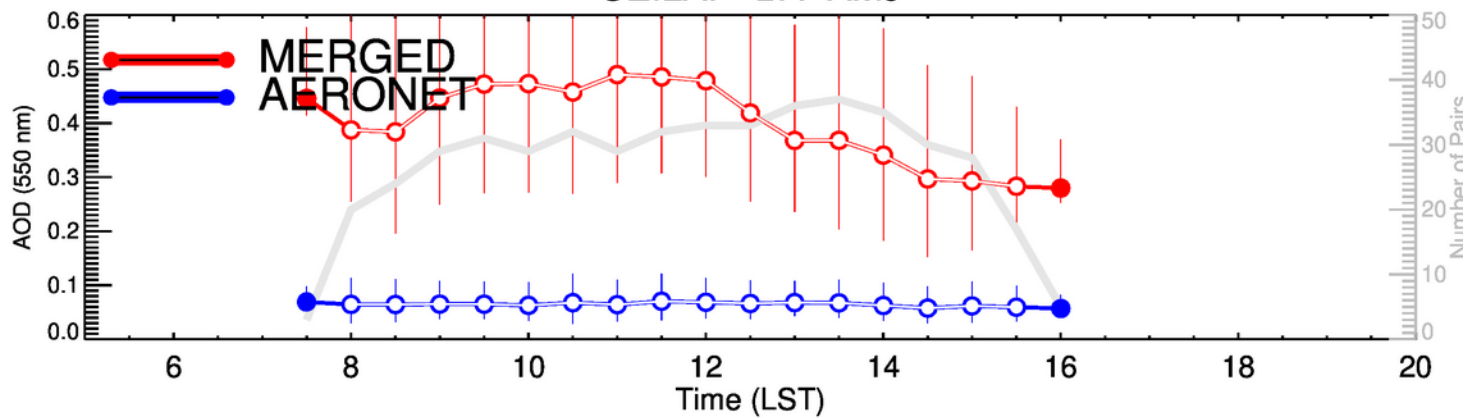

### CEILAP-BA-JAS

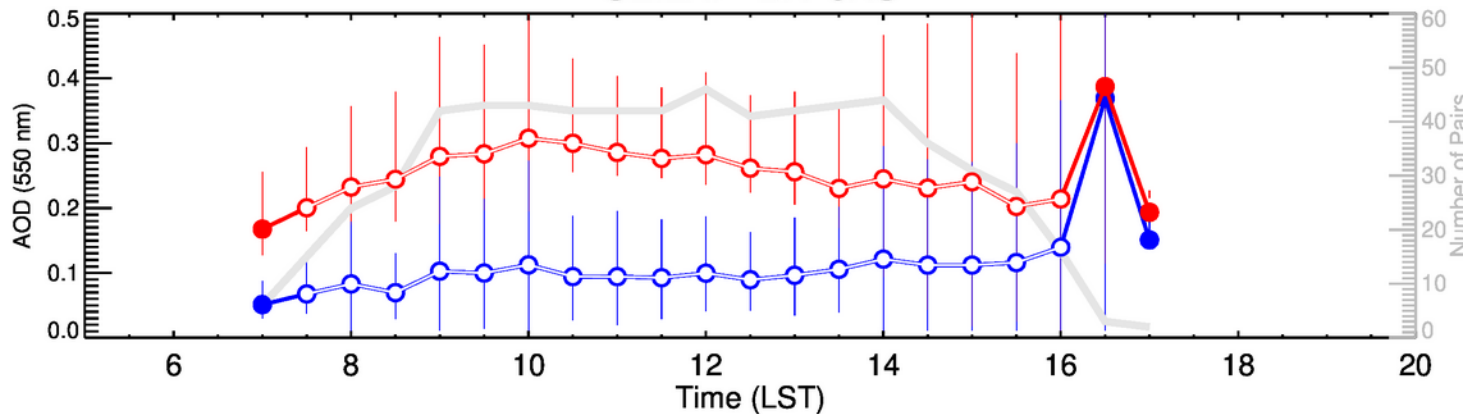

### CEILAP-BA-OND

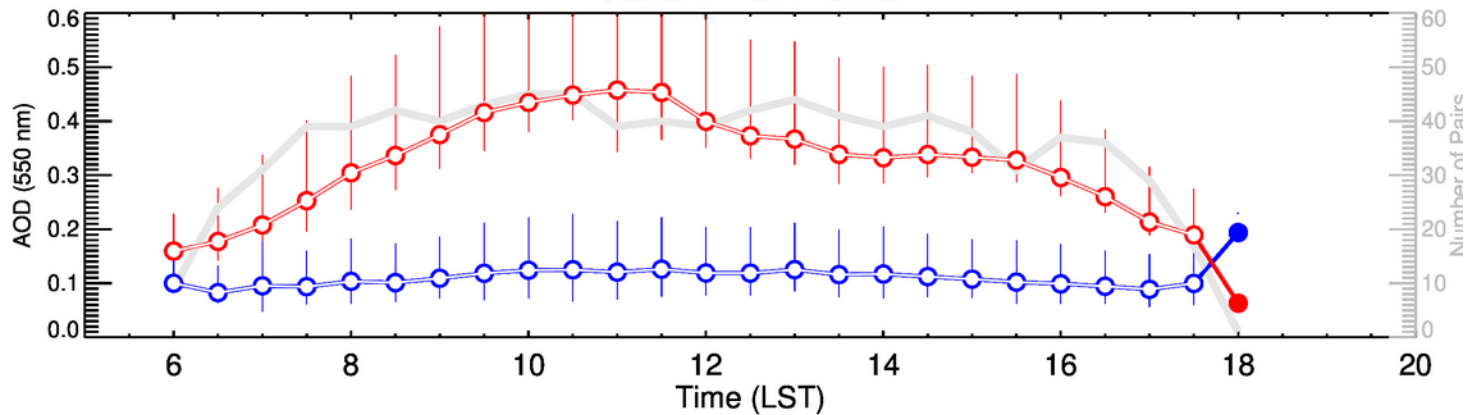

### CEILAP-BA-JFM

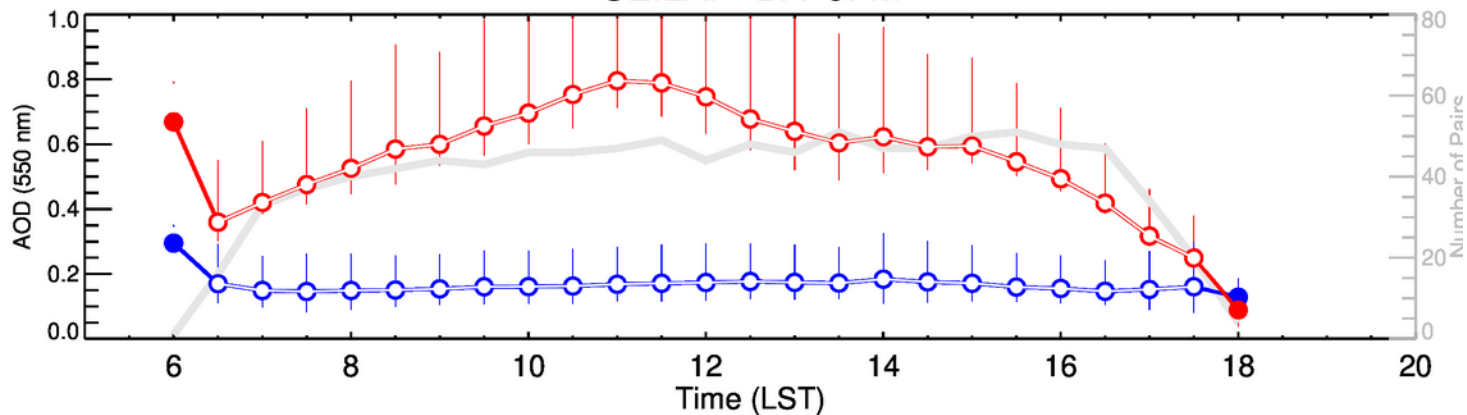

### Chiang\_Mai\_Met\_Sta-AMJ

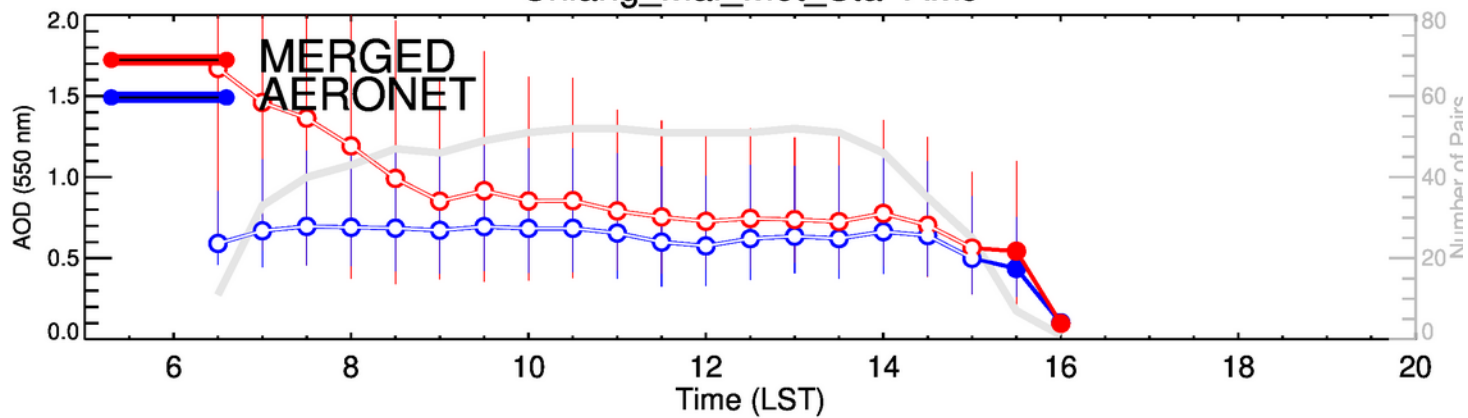

### Chiang\_Mai\_Met\_Sta-JAS

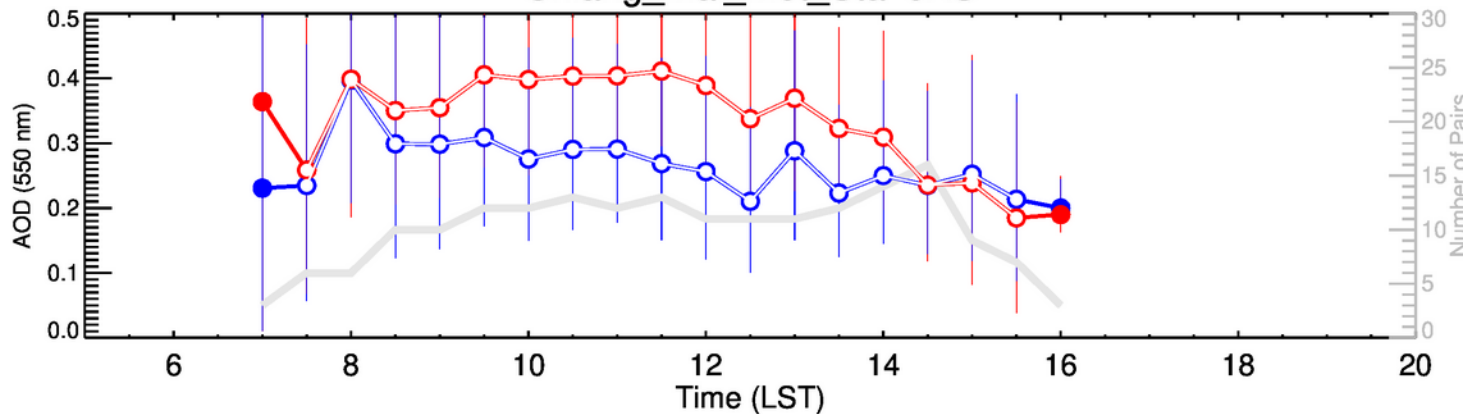

### Chiang\_Mai\_Met\_Sta-OND

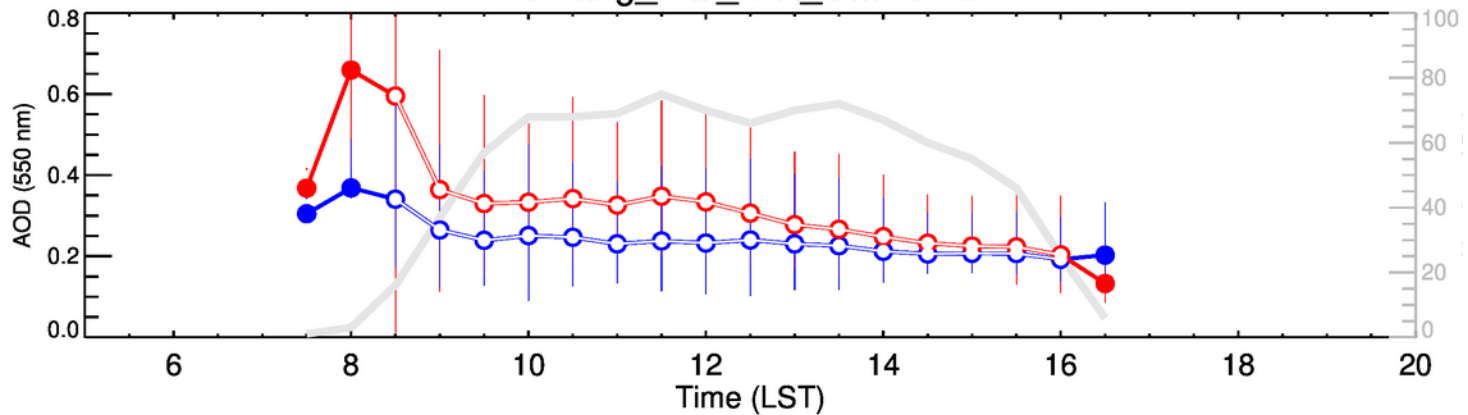

### Chiang\_Mai\_Met\_Sta-JFM

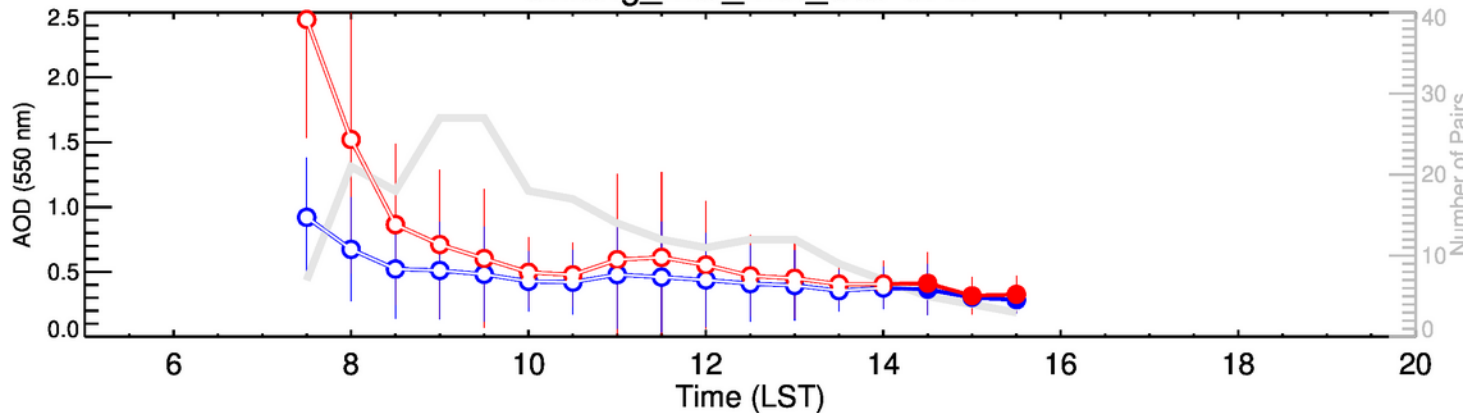

### Chiba\_University-AMJ

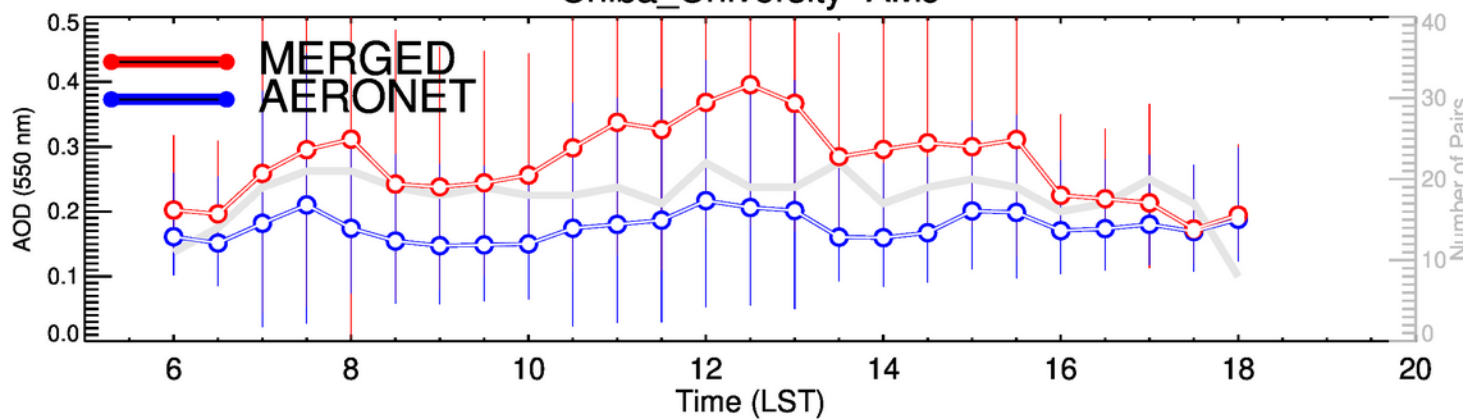

### Chiba\_University-JAS

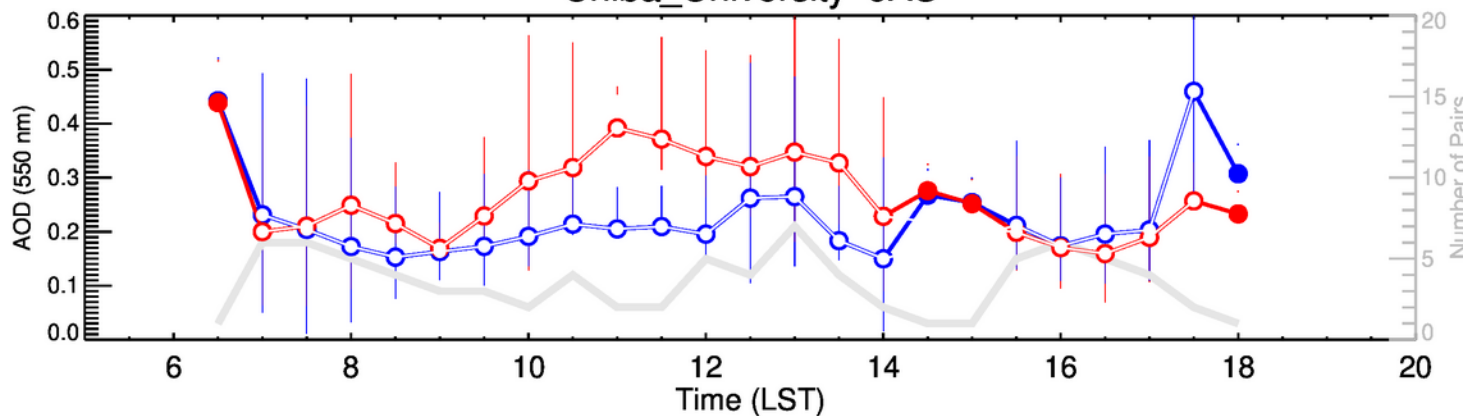

### Chiba\_University-OND

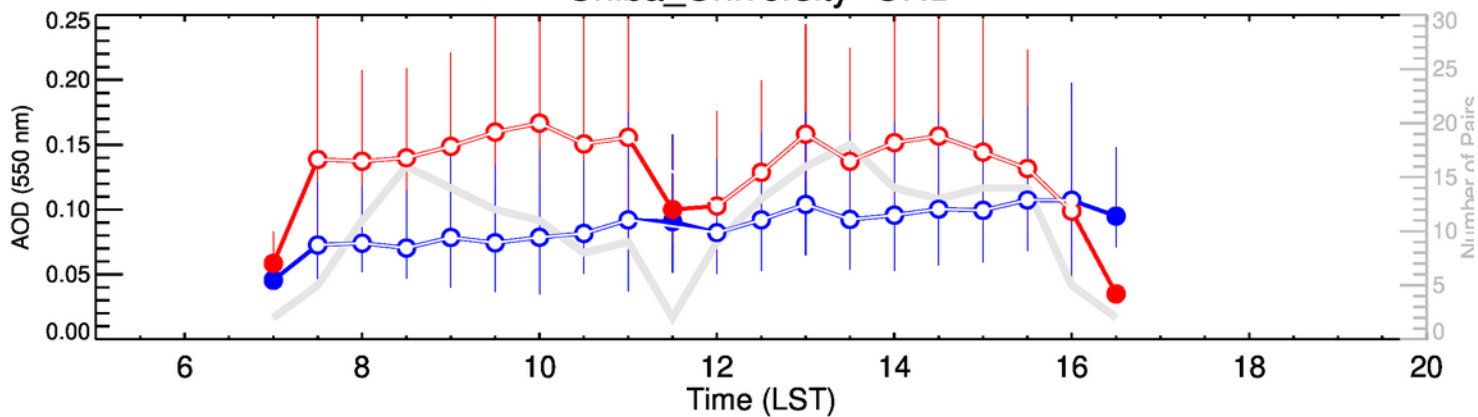

### Chiba\_University-JFM

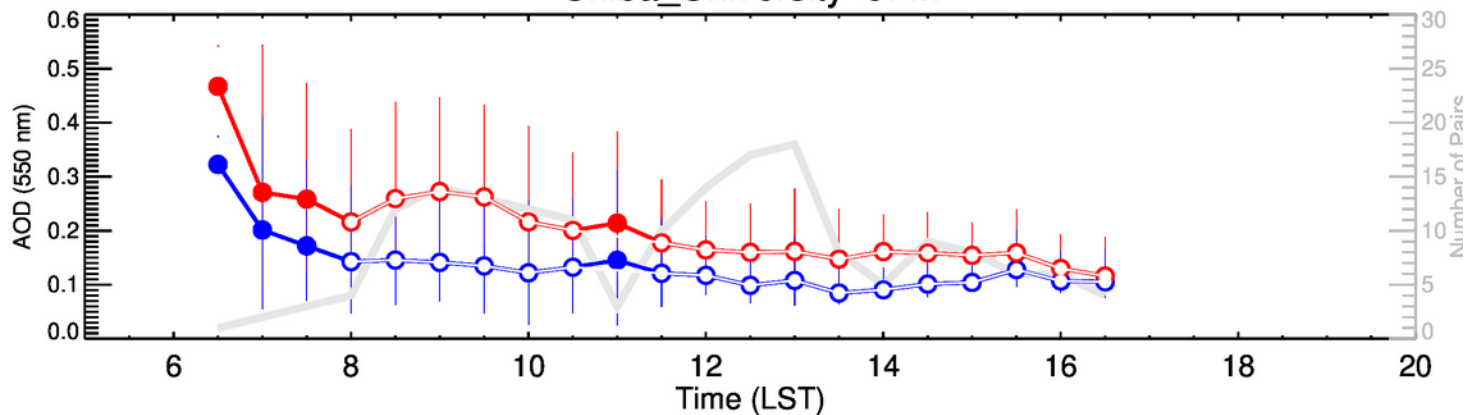

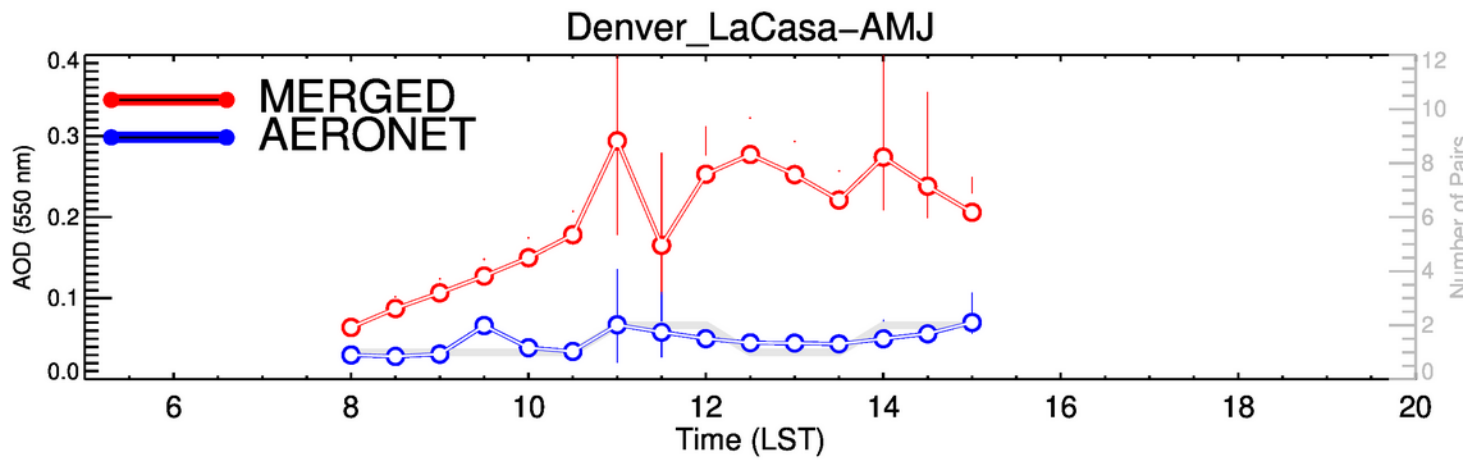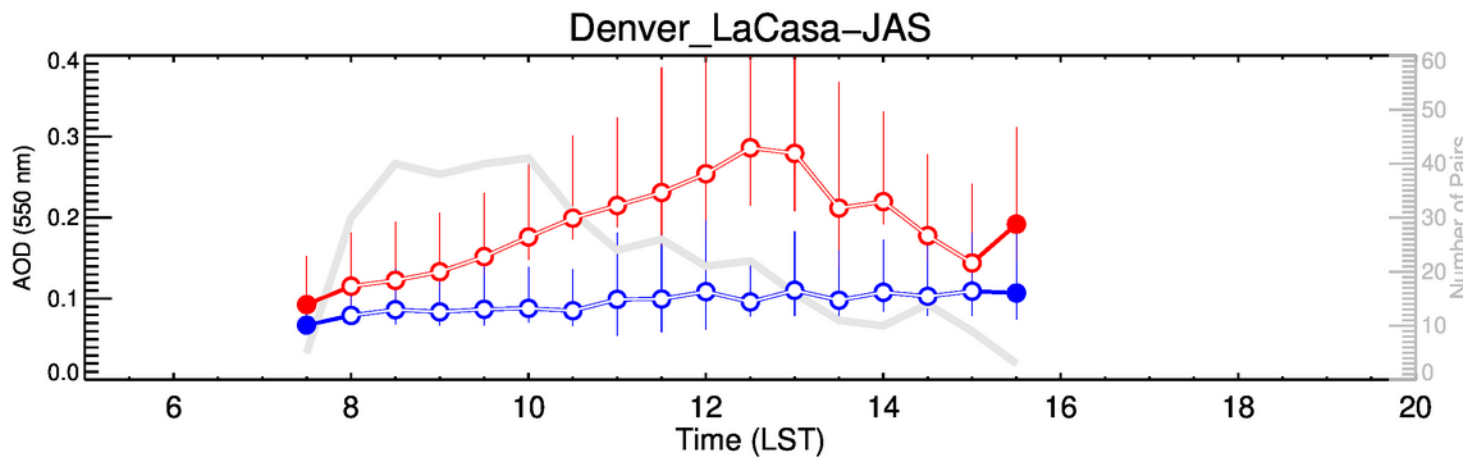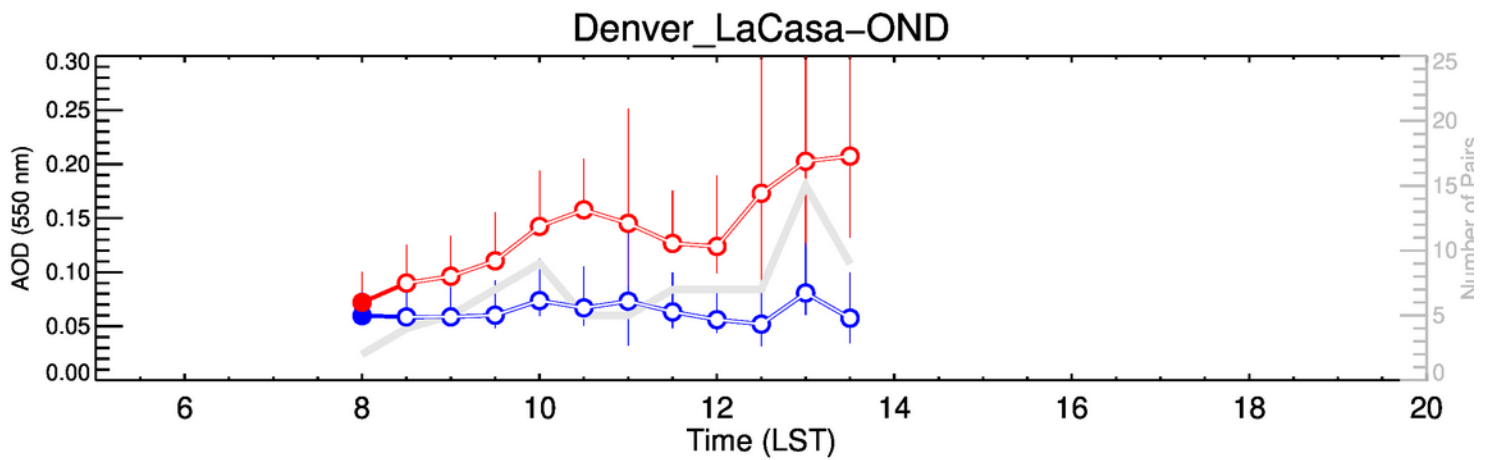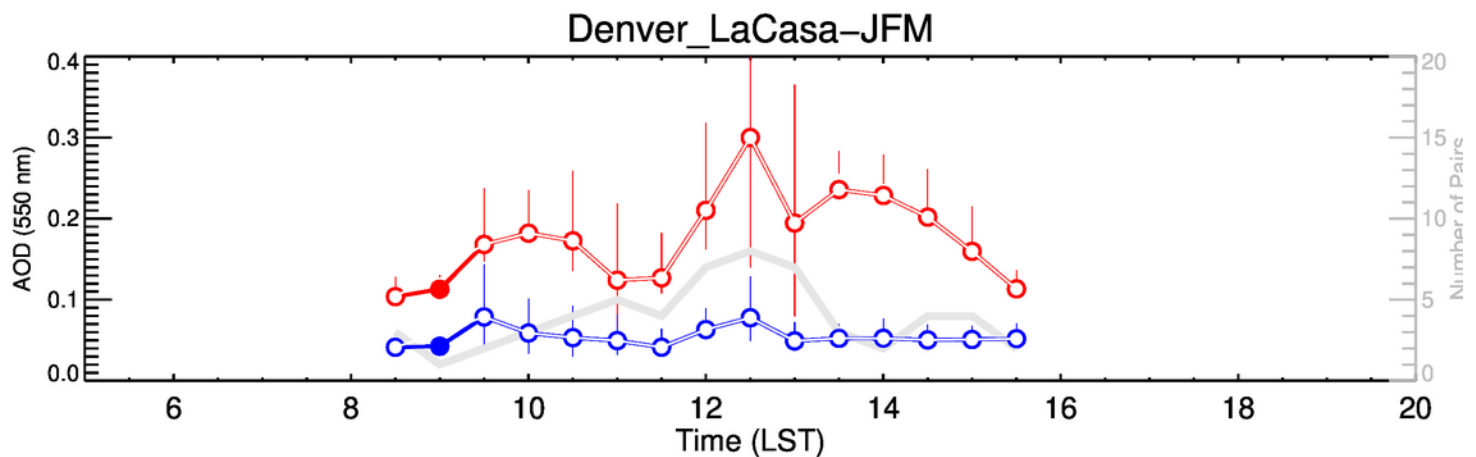

### Dibrugarh\_ Univ-AMJ

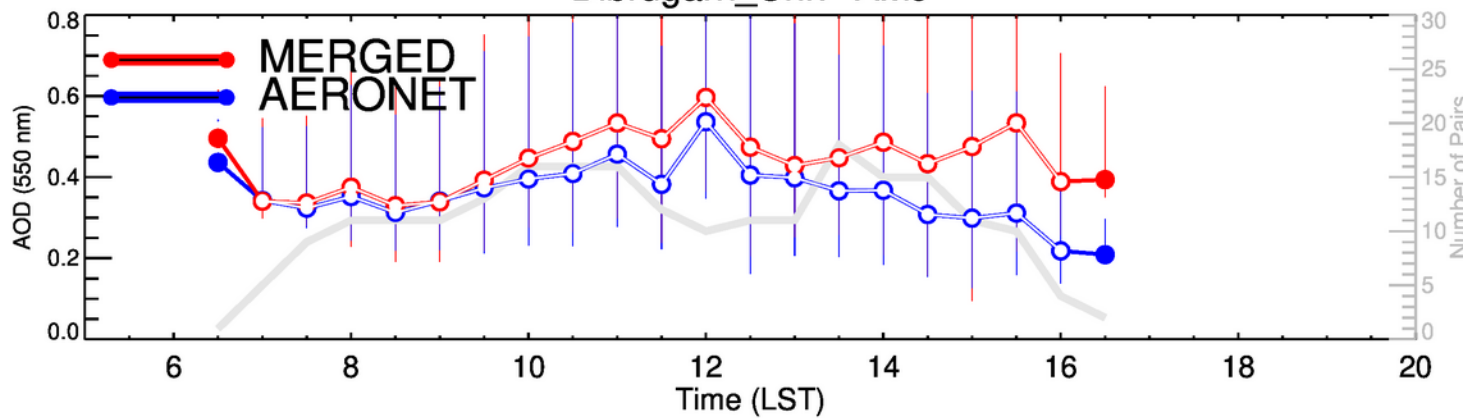

### Dibrugarh\_ Univ-OND

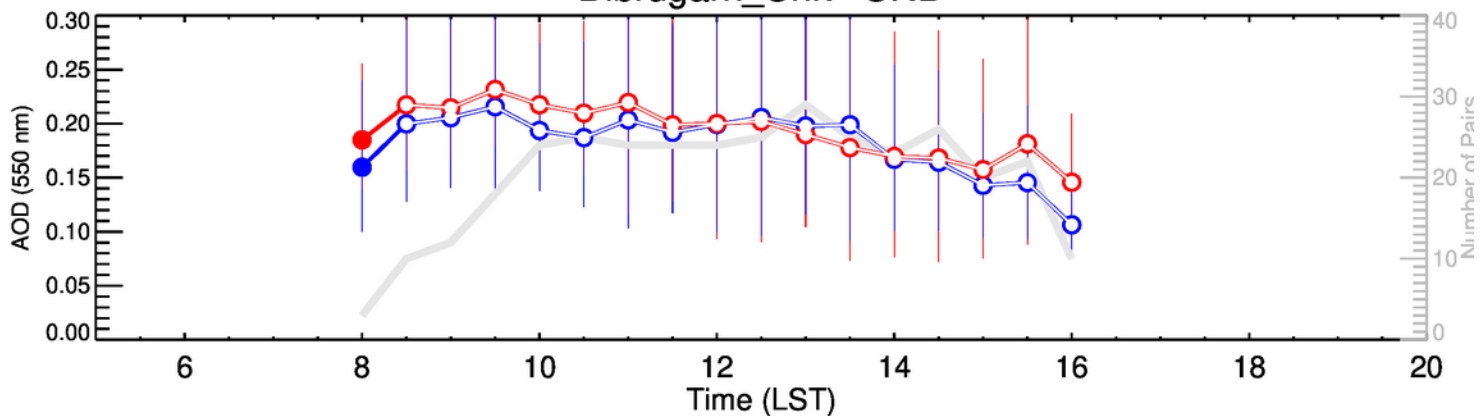

### Dibrugarh\_ Univ-JFM

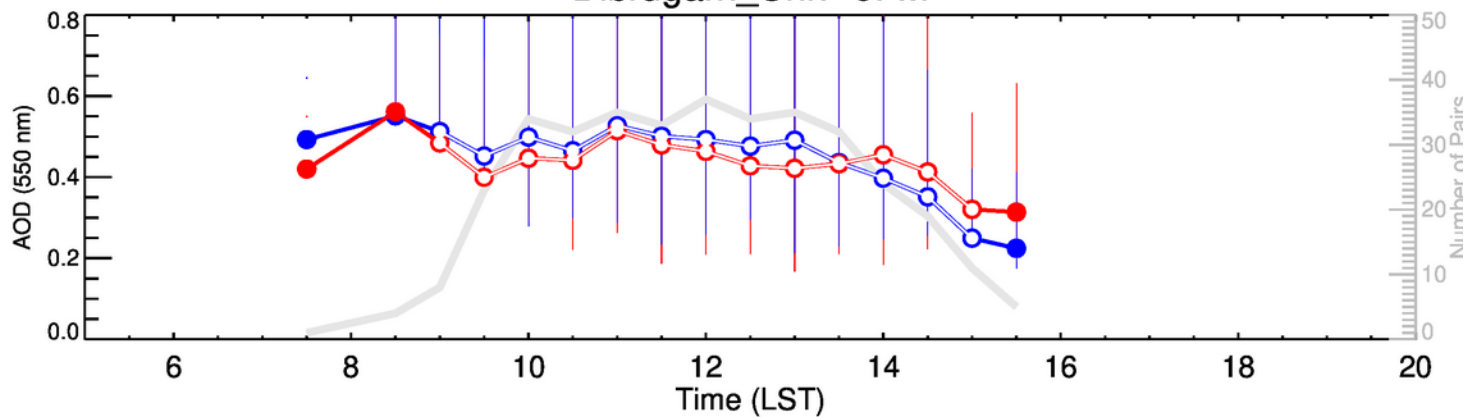

### Dongsha\_Island-AMJ

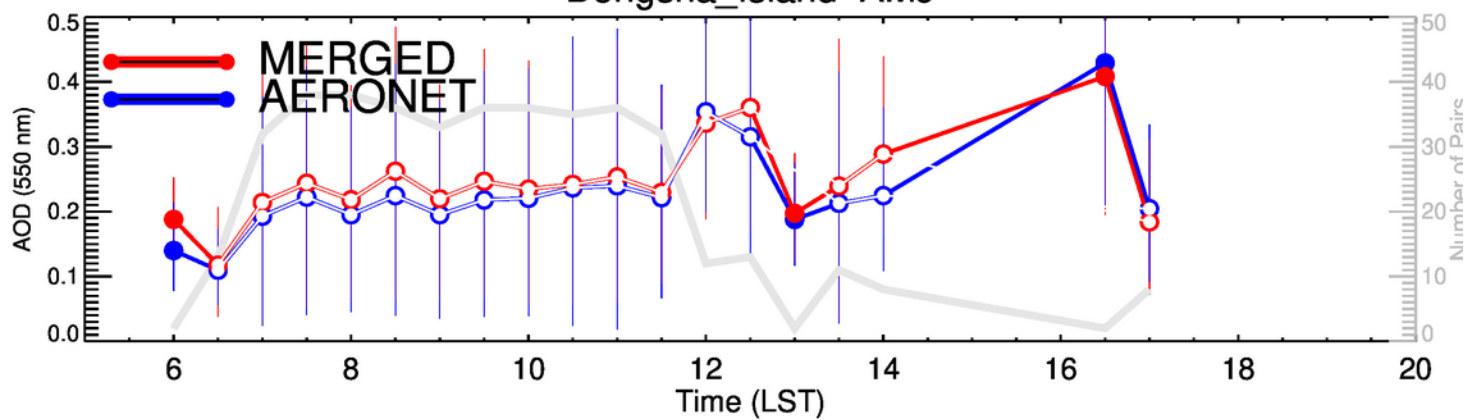

### Dongsha\_Island-JAS

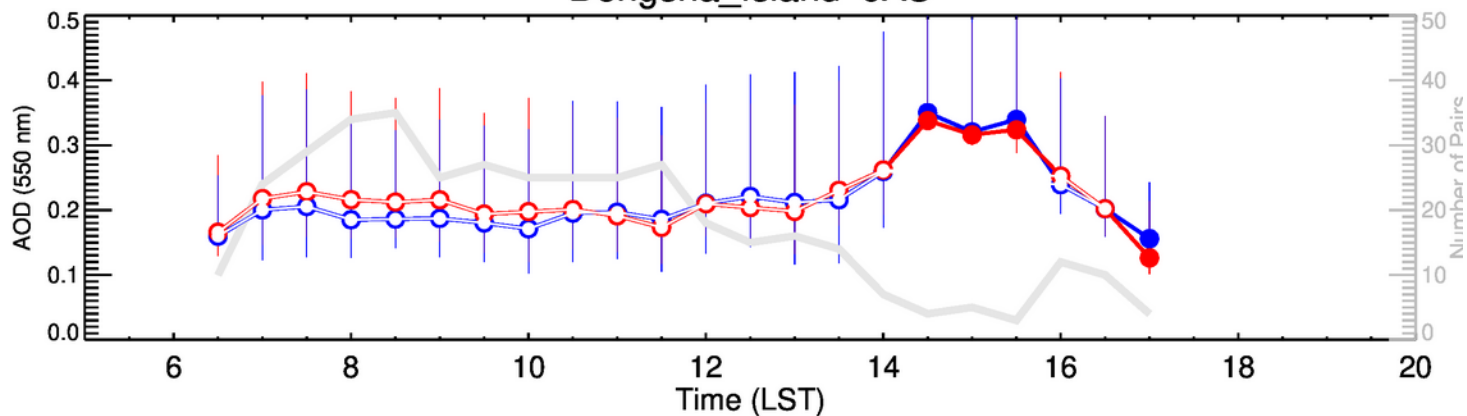

### Dongsha\_Island-OND

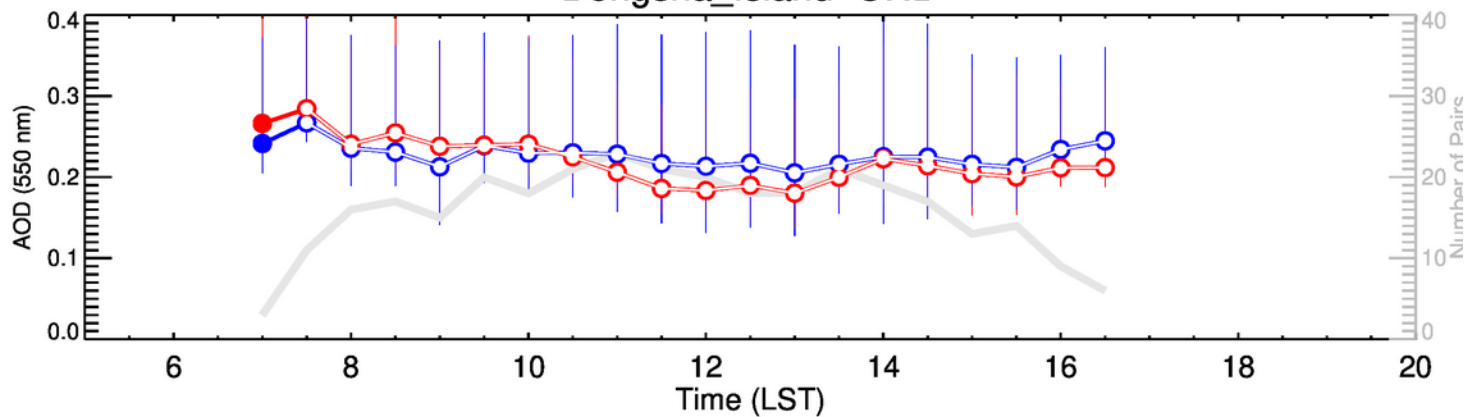

### Dongsha\_Island-JFM

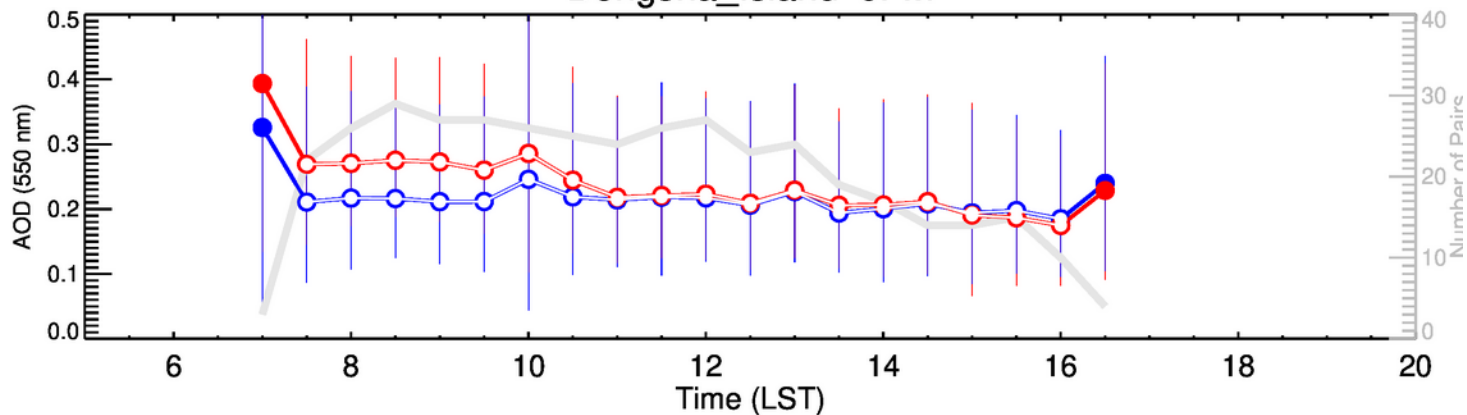

### Easton-MDE-AMJ

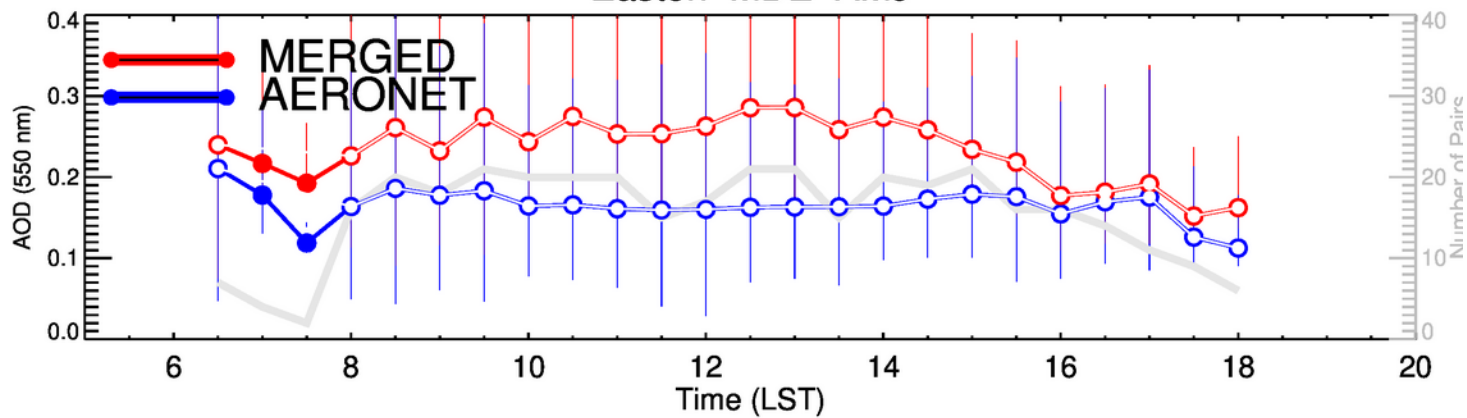

### Easton-MDE-JAS

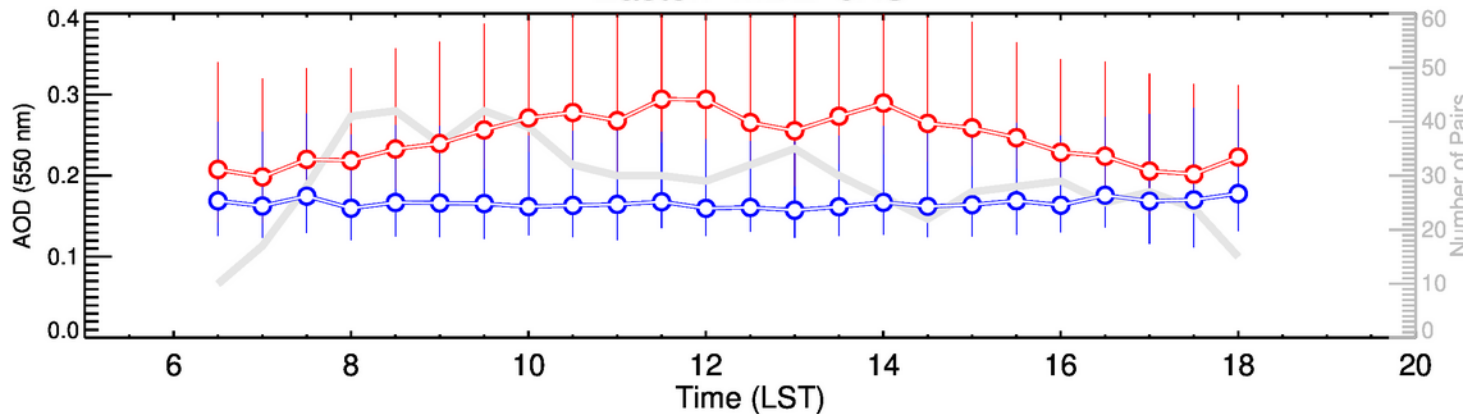

### Easton-MDE-OND

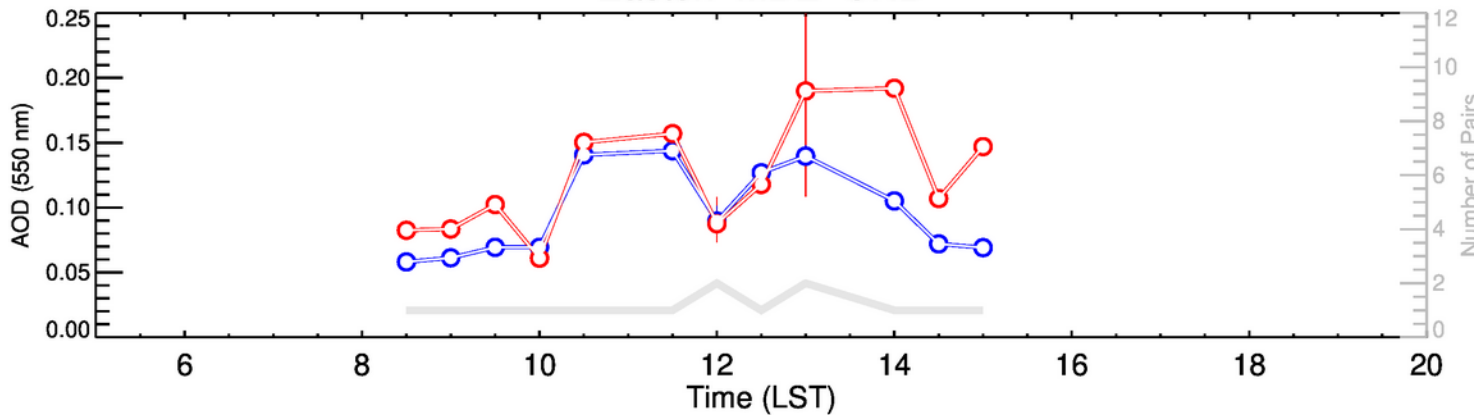

### Easton-MDE-JFM

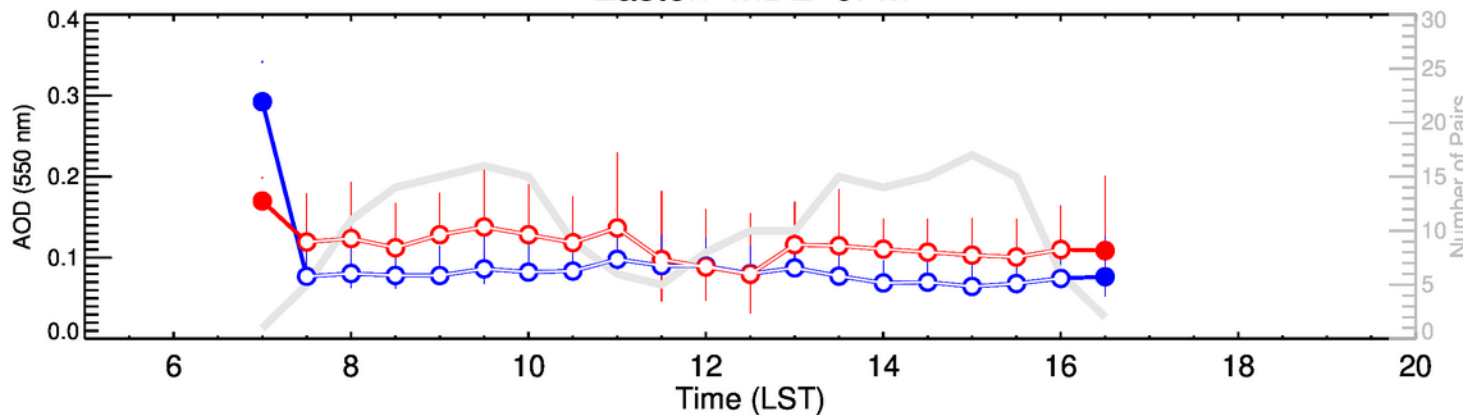



### Egbert-AMJ

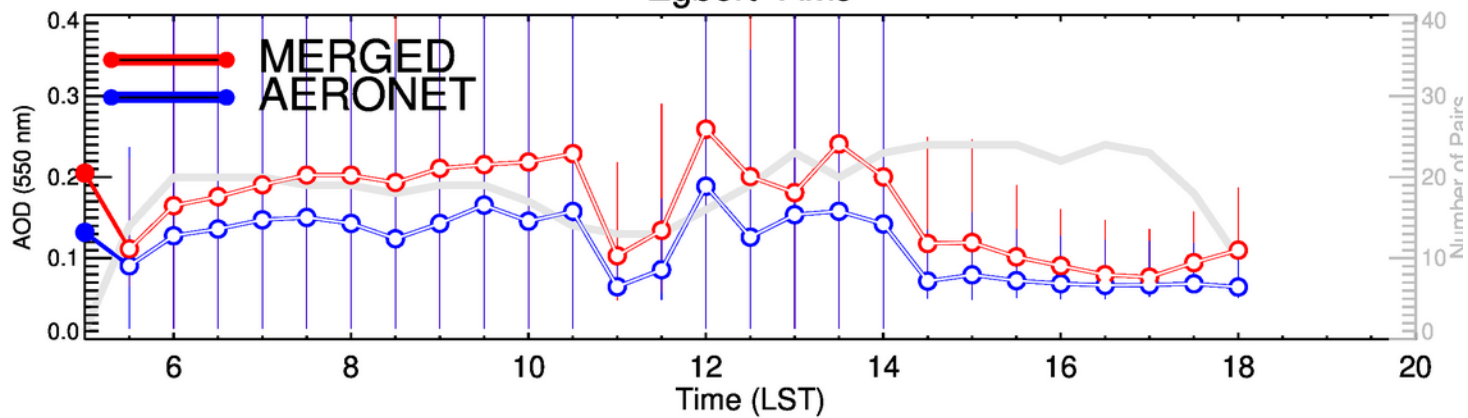

### Egbert-JAS

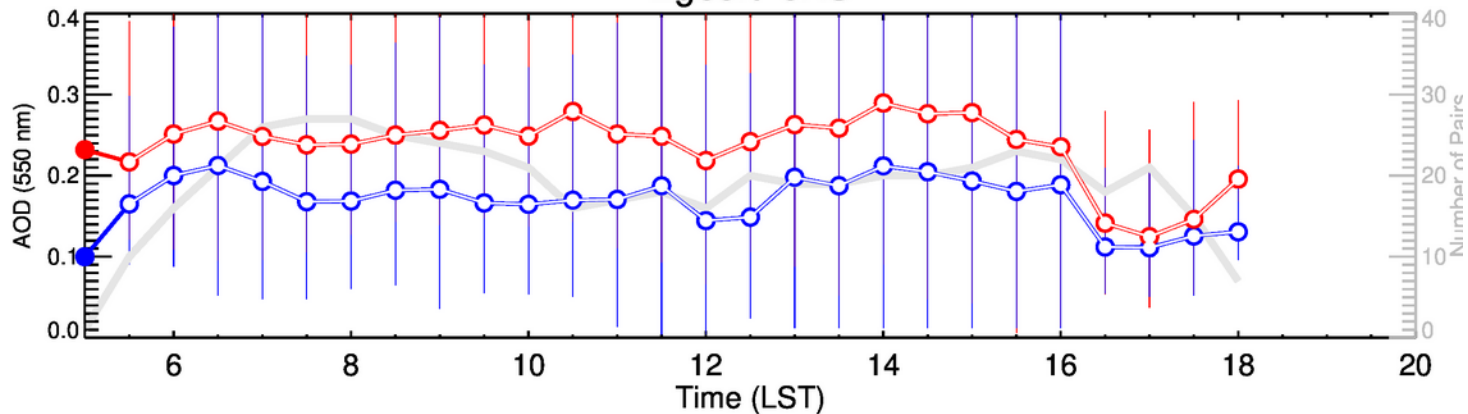

### Egbert-OND

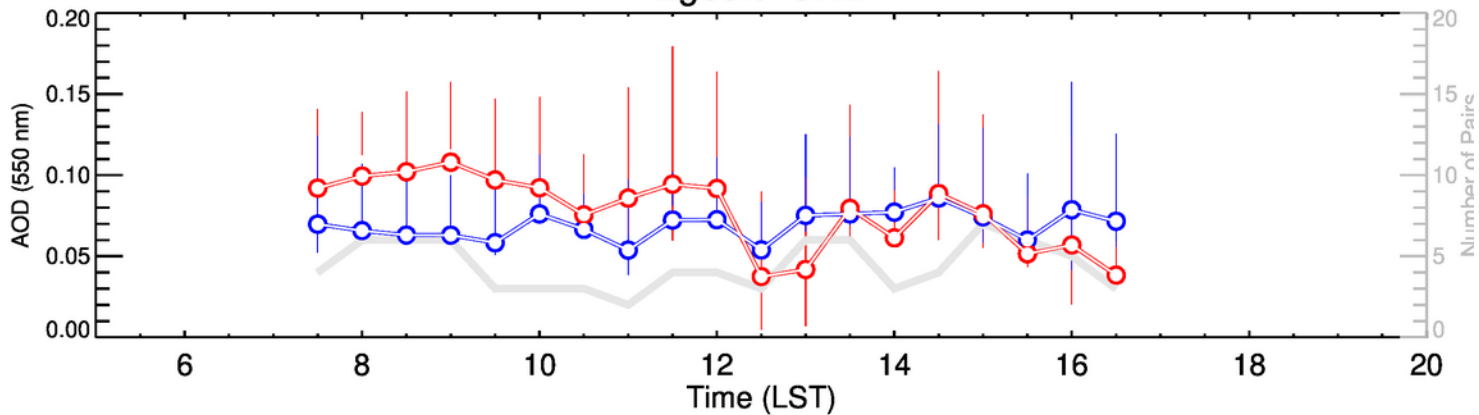

### Egbert-JFM

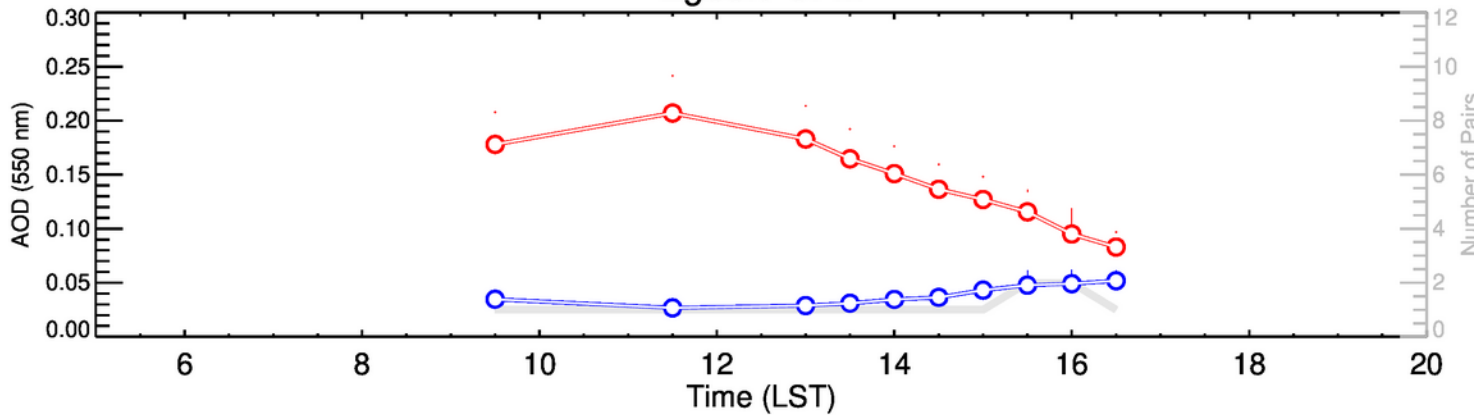

### EI\_Arenosillo-AMJ

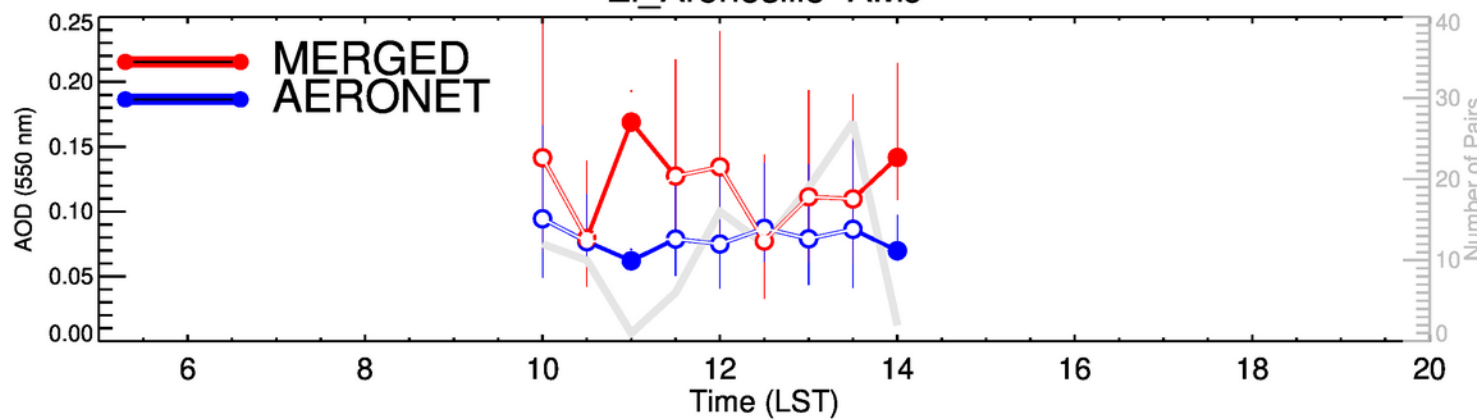

### EI\_Arenosillo-JAS

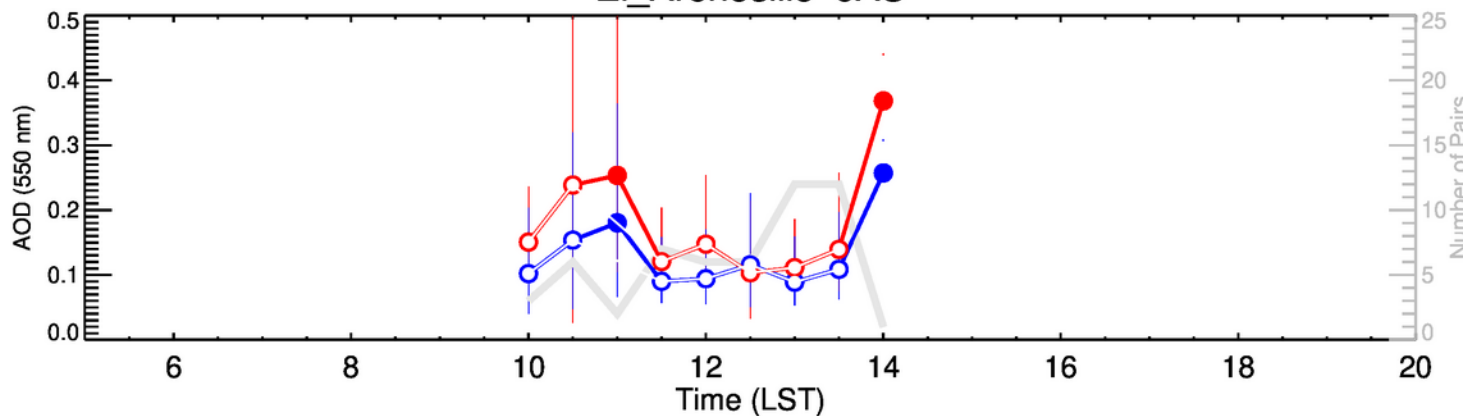

### EI\_Arenosillo-OND

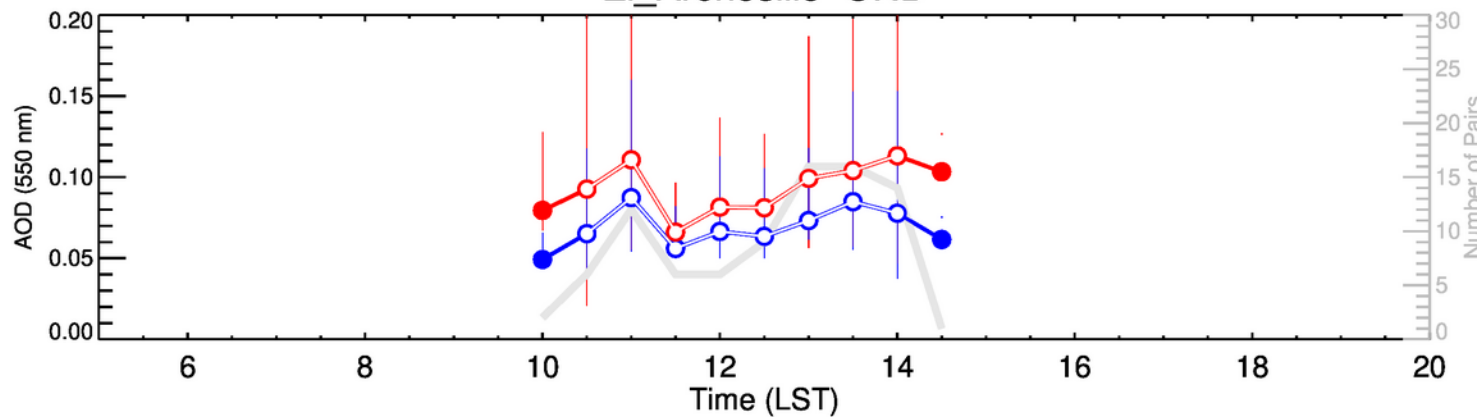

### EI\_Arenosillo-JFM

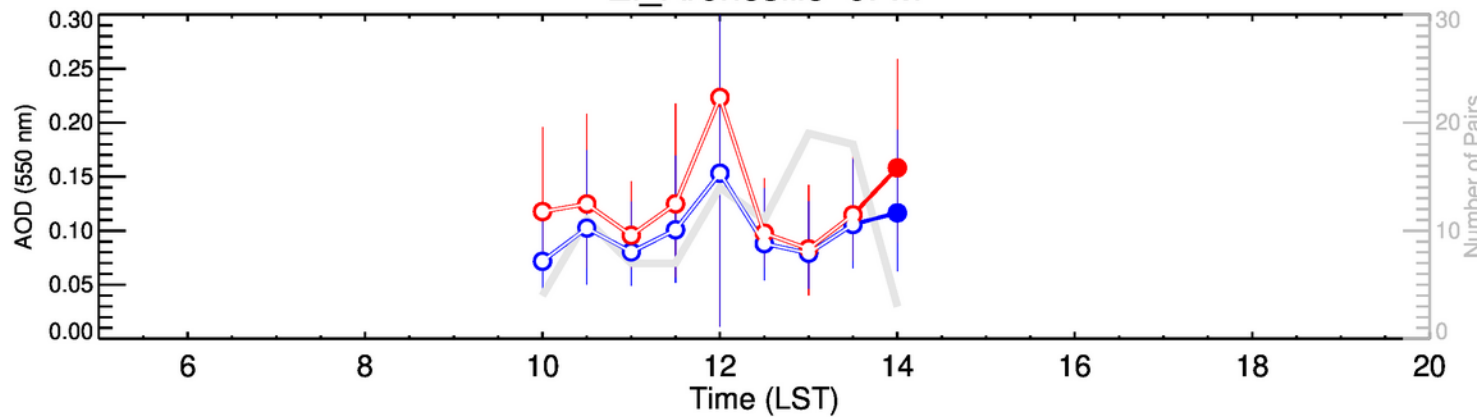

### EPA-NCU-AMJ

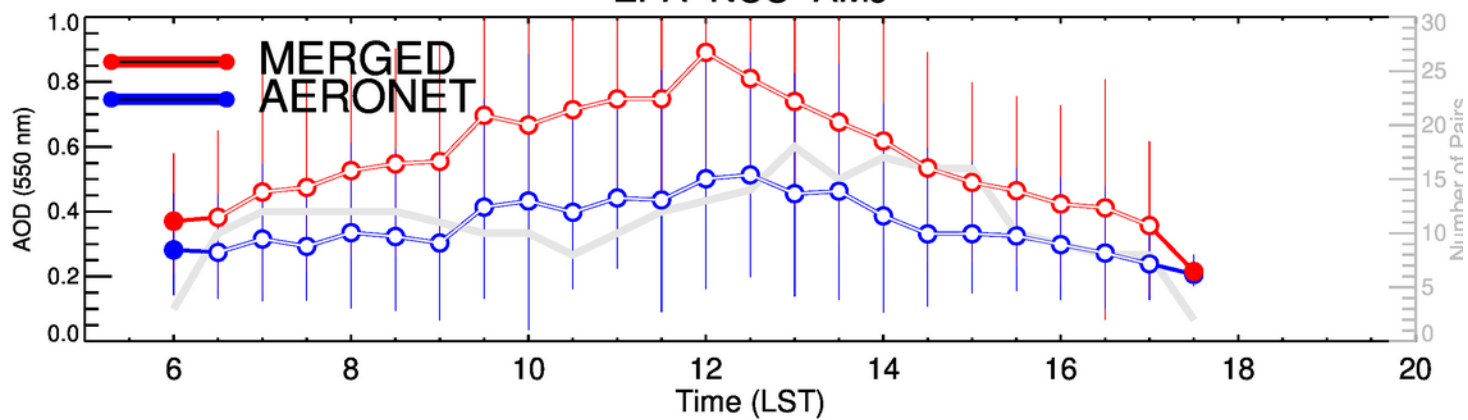

### EPA-NCU-JAS

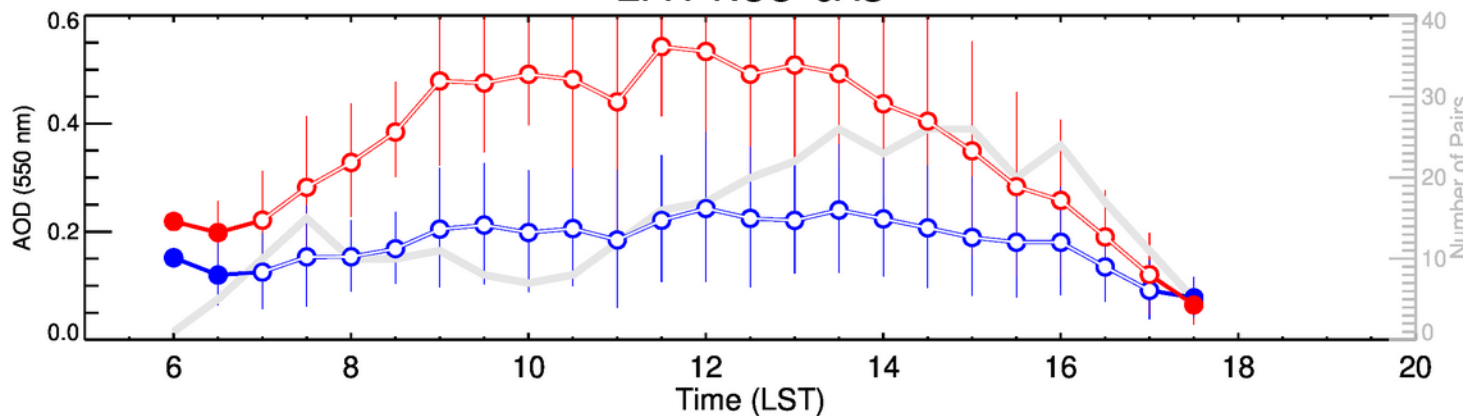

### EPA-NCU-OND

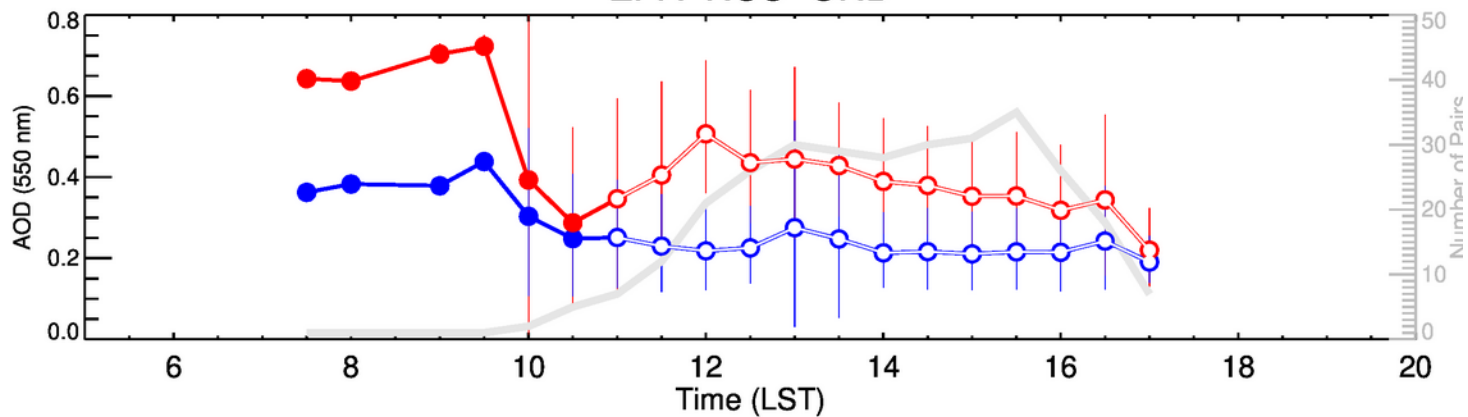

### EPA-NCU-JFM

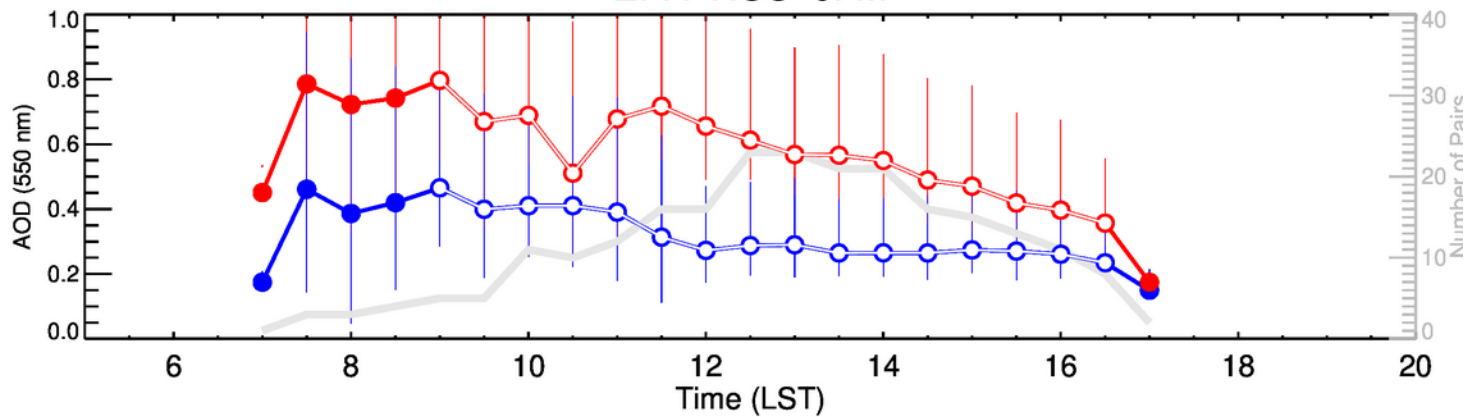

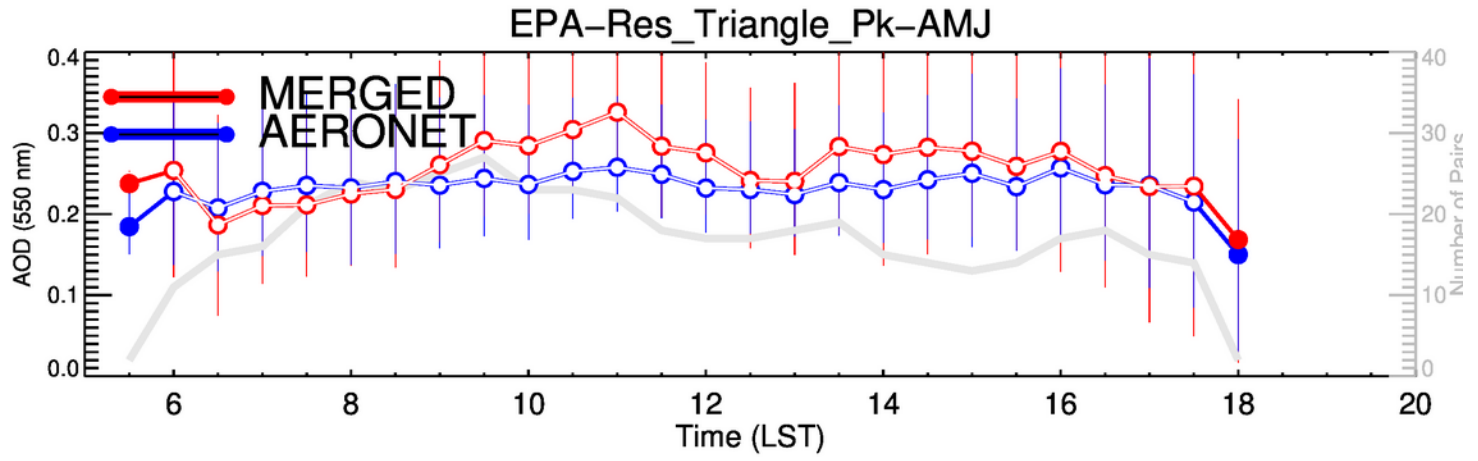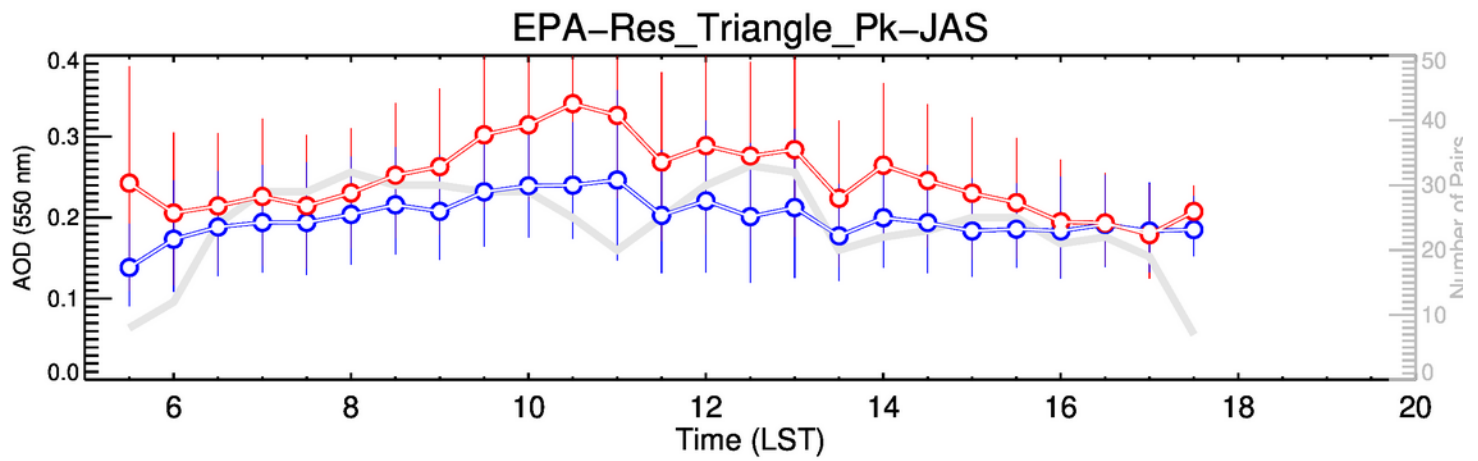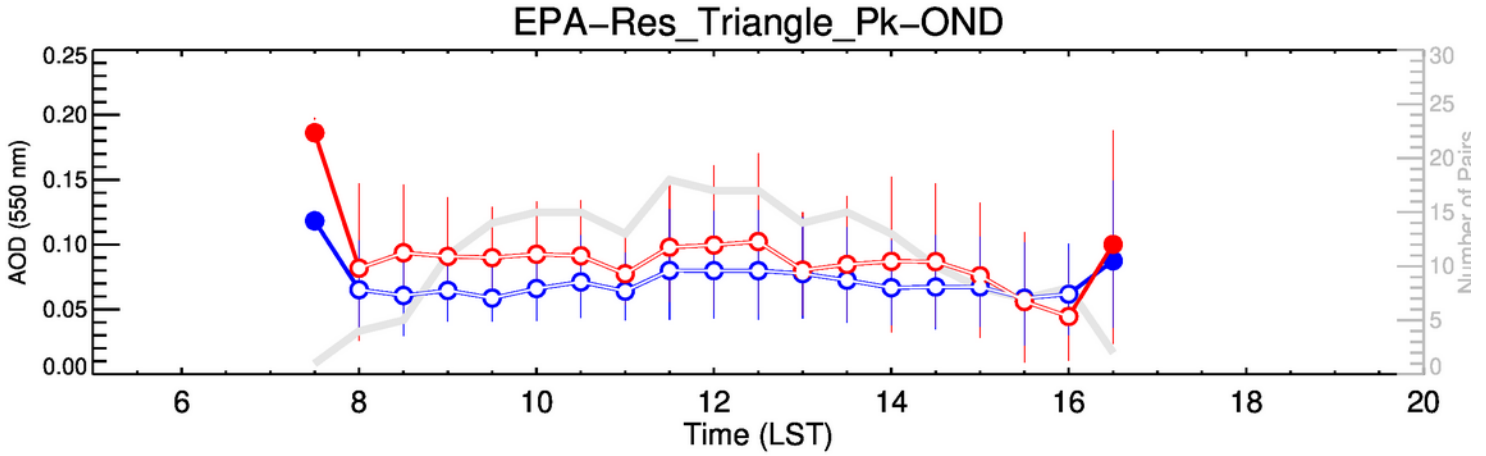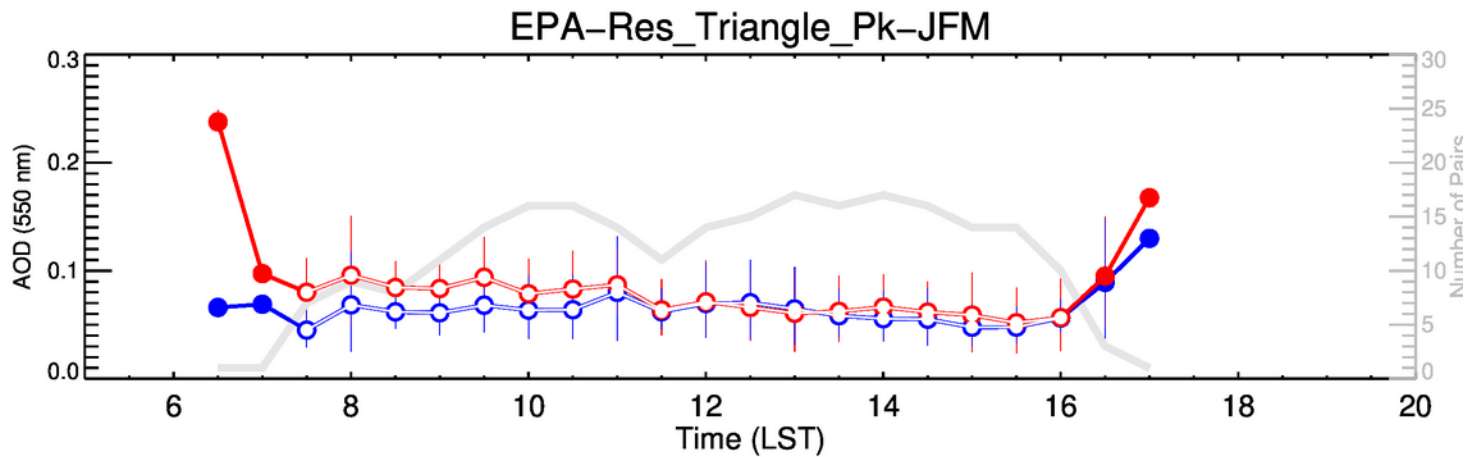

### Fukue-AMJ

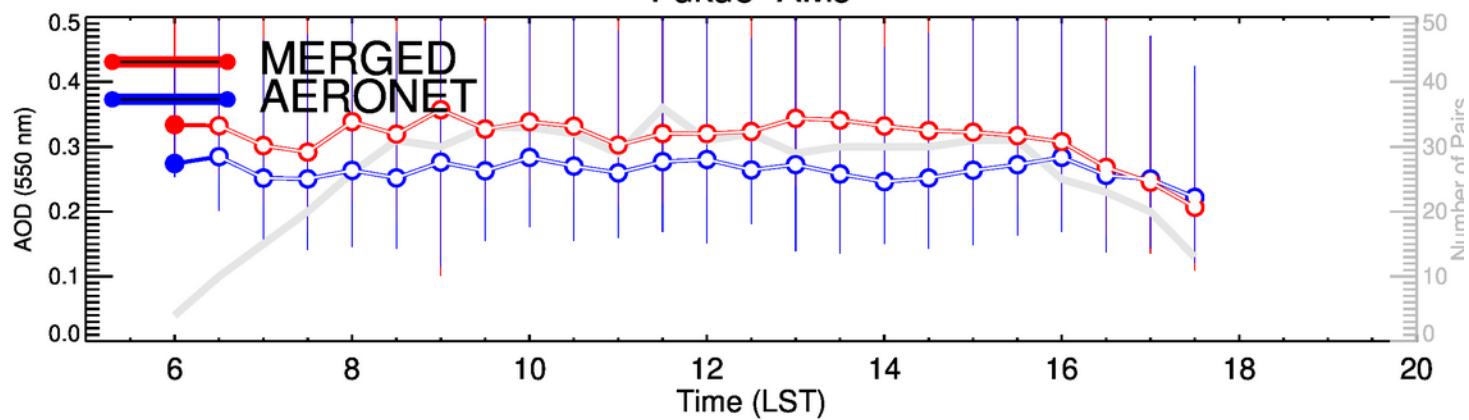

### Fukue-JAS

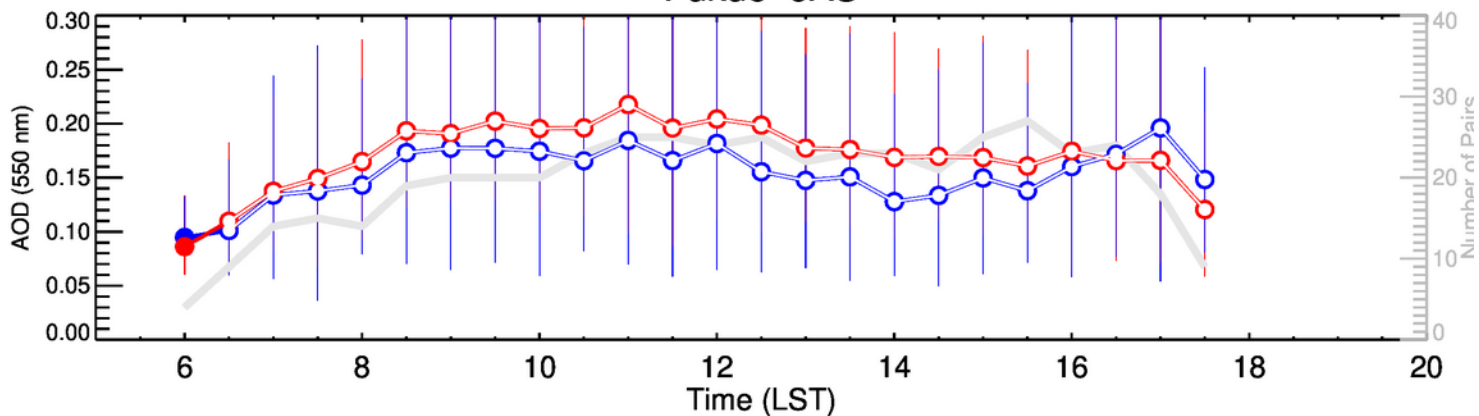

### Fukue-OND

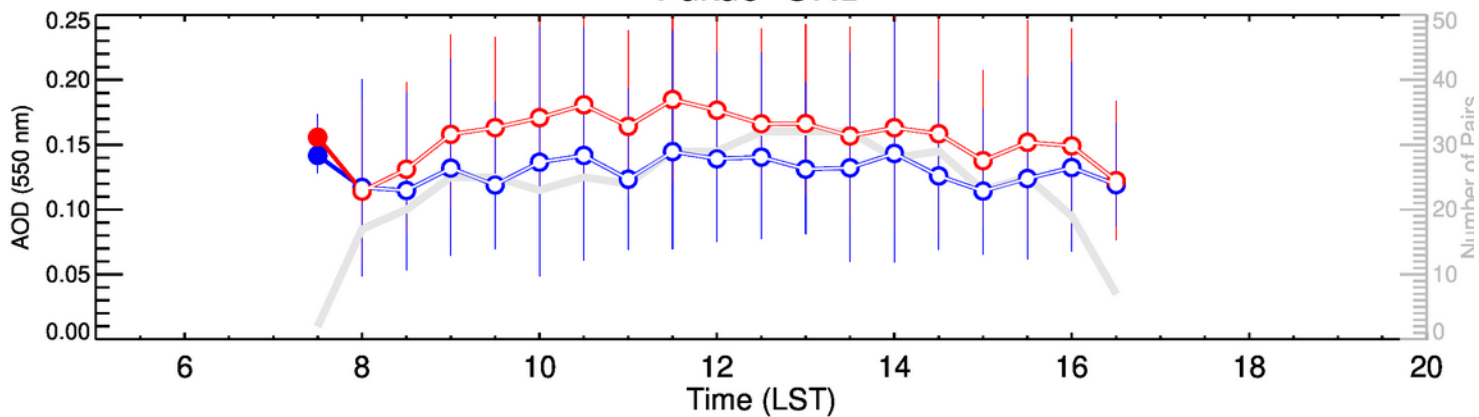

### Fukue-JFM

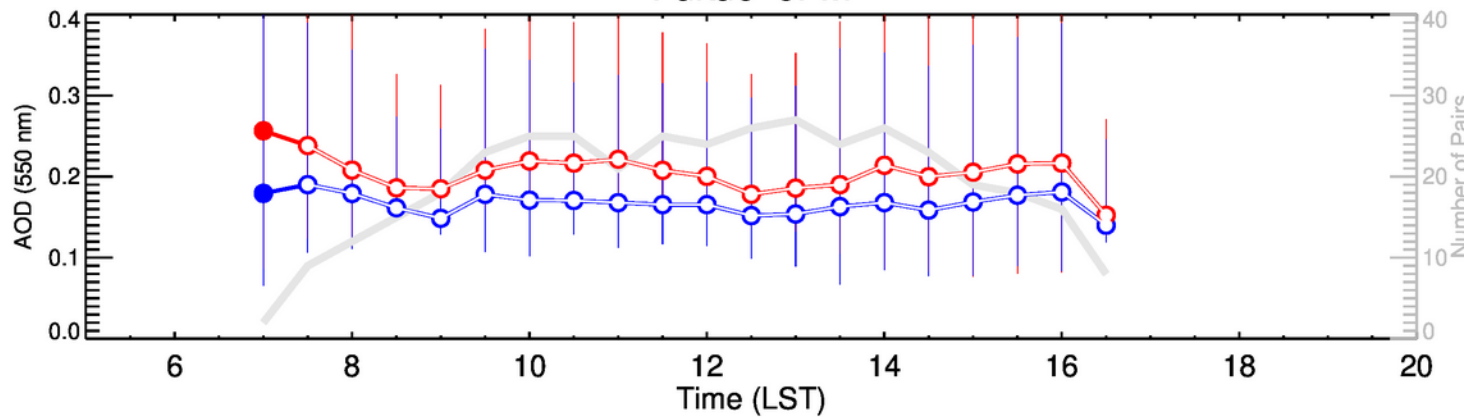

Fukuoka-AMJ

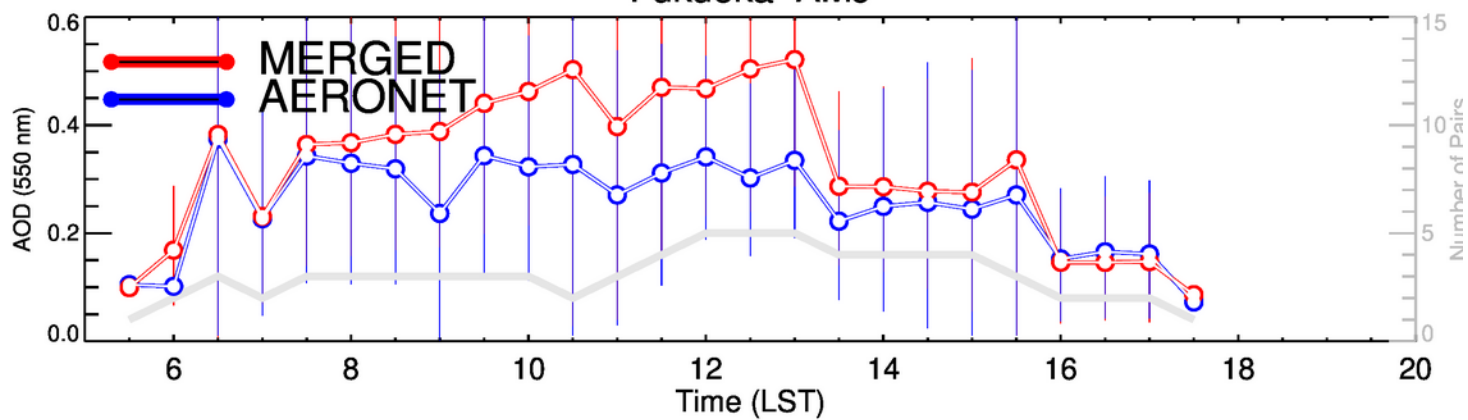

Fukuoka-JAS

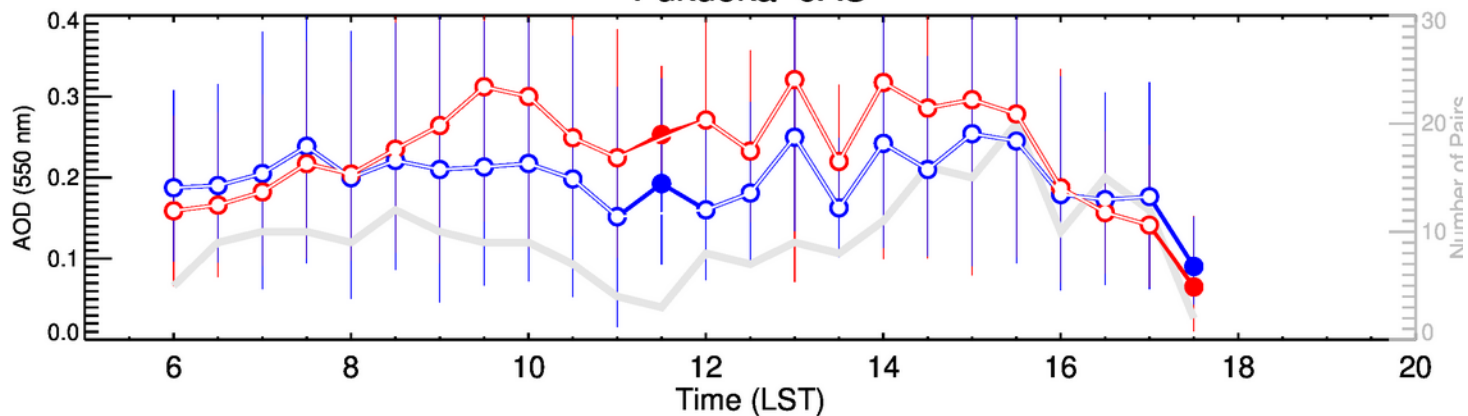

Fukuoka-OND

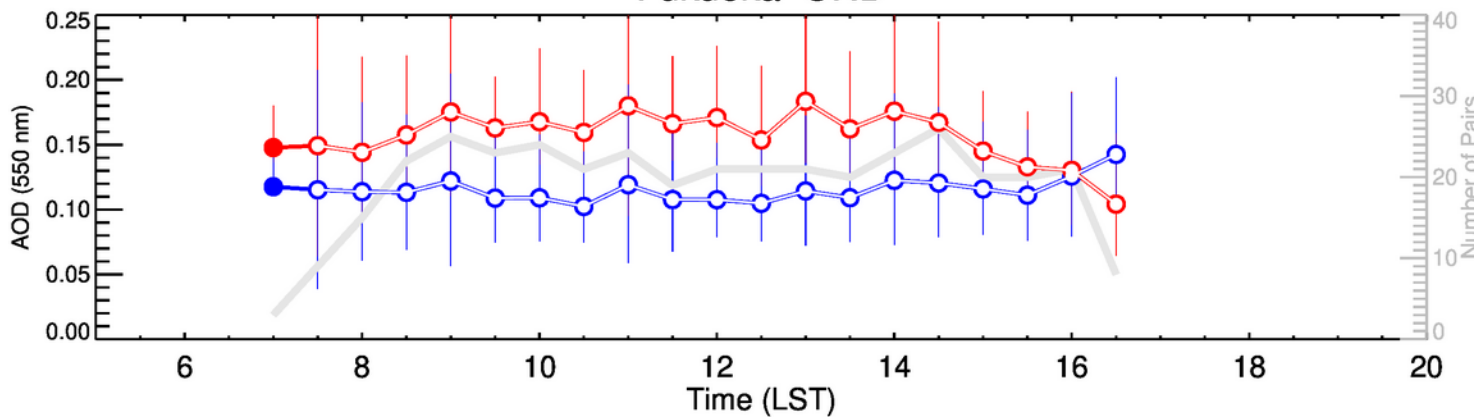

Fukuoka-JFM

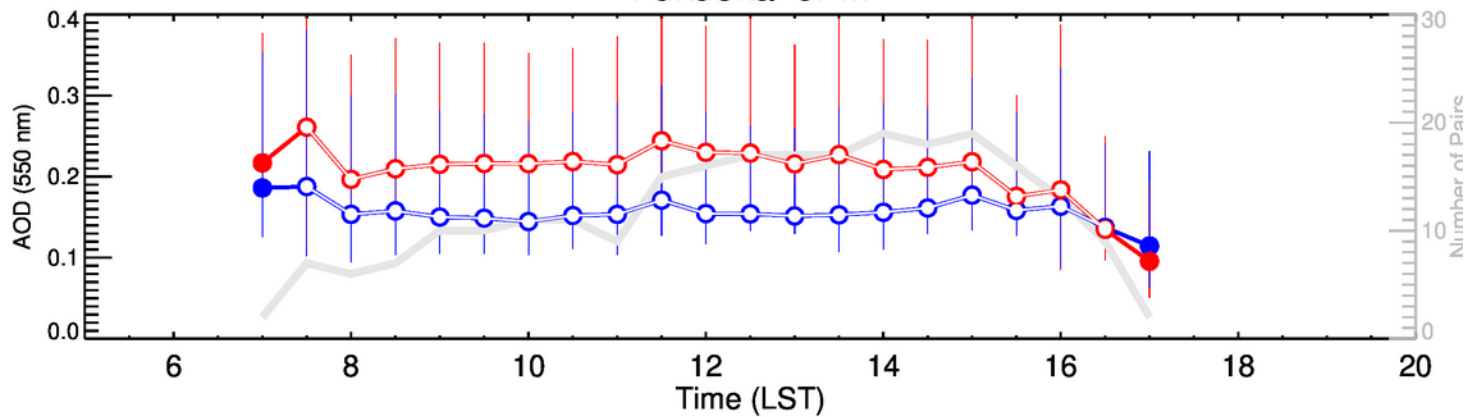

### Georgia\_Tech-AMJ

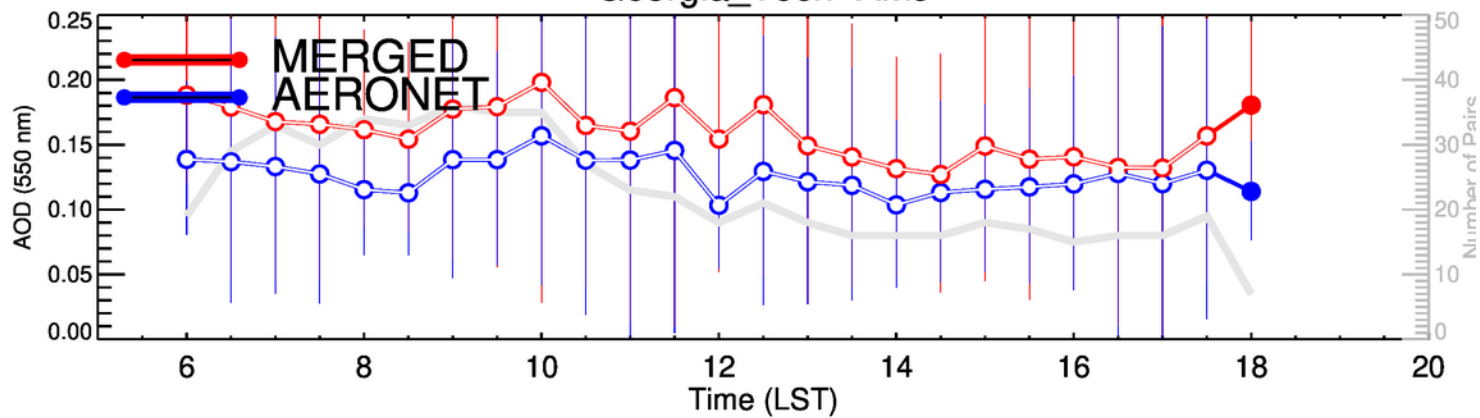

### Georgia\_Tech-JAS

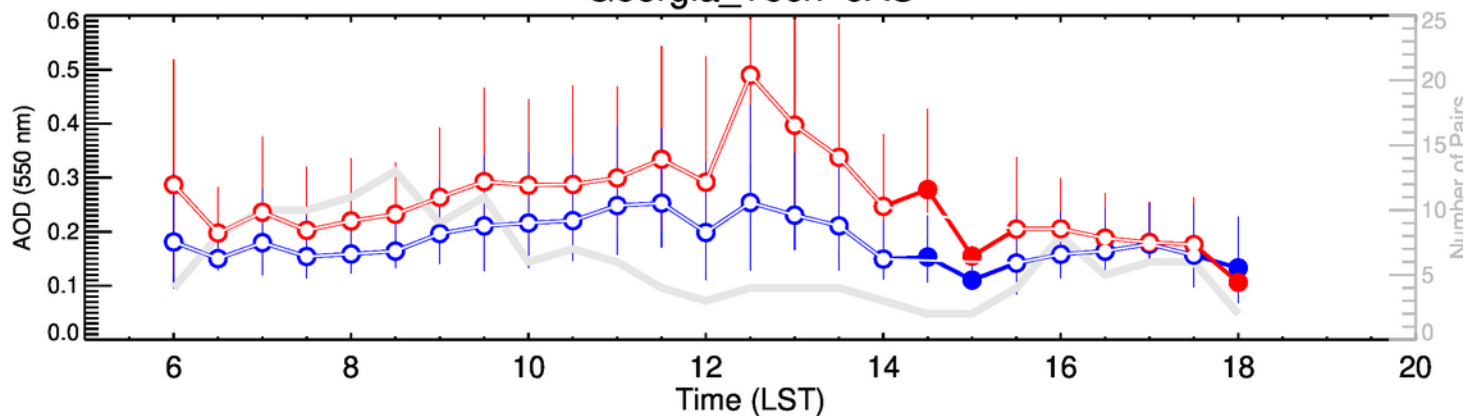

### Georgia\_Tech-OND

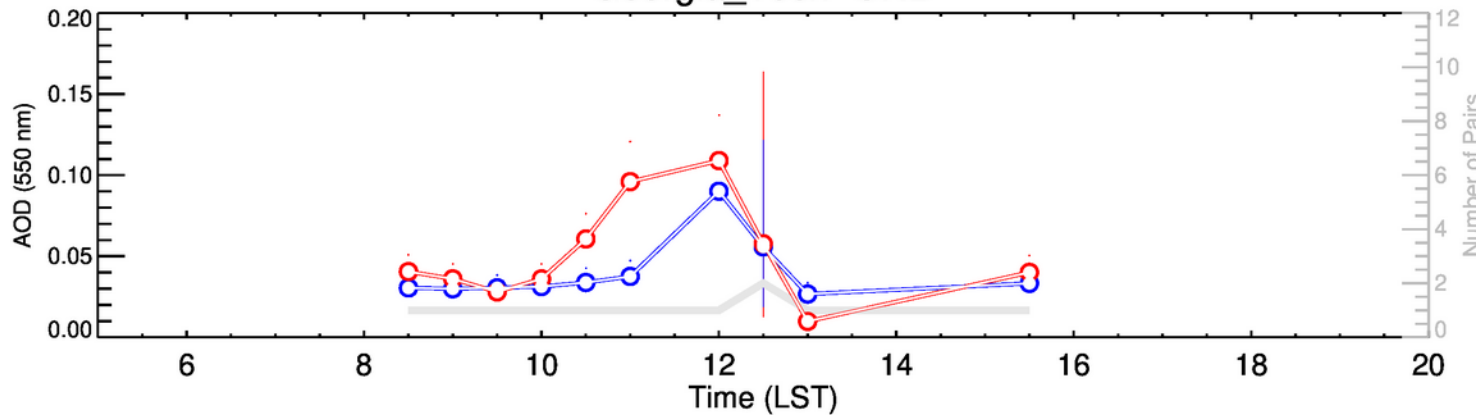

### Georgia\_Tech-JFM

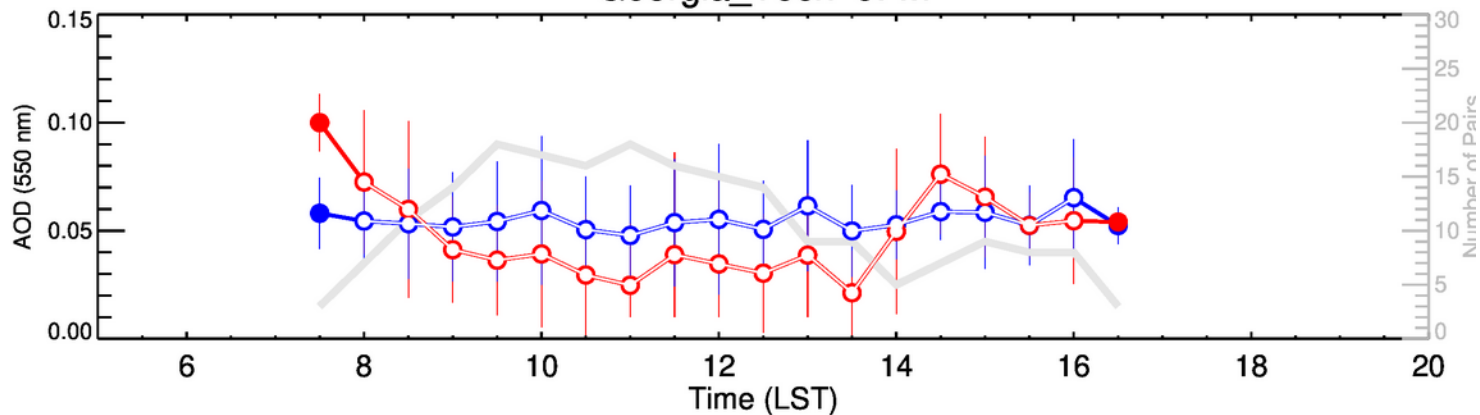

### Hampton\_University-AMJ

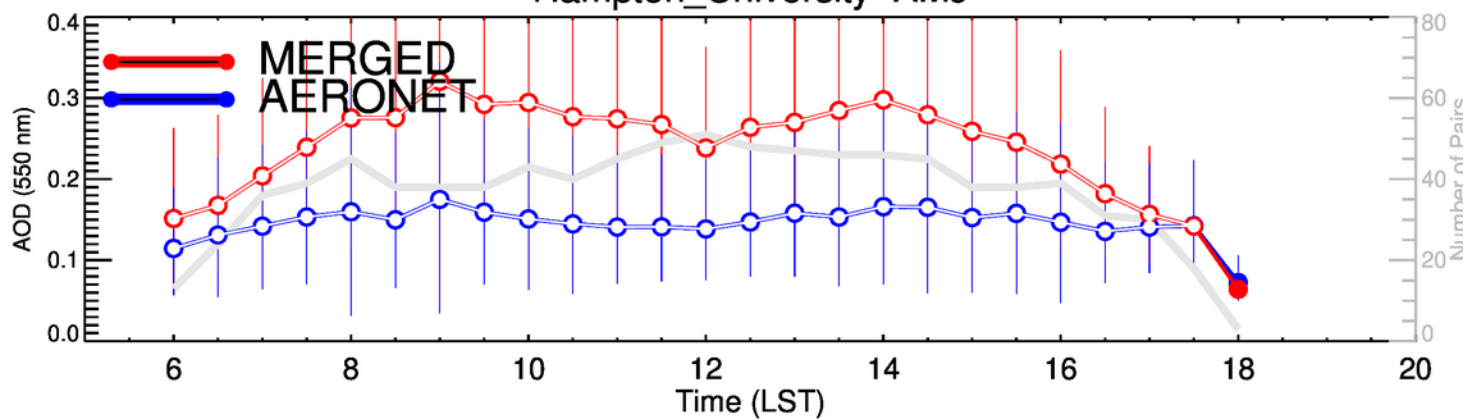

### Hampton\_University-JAS

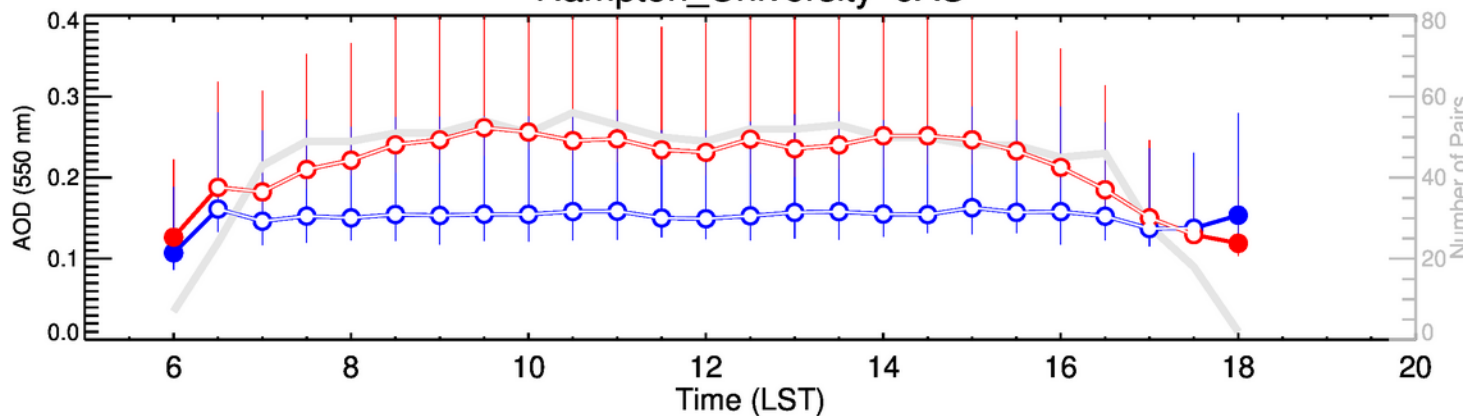

### Hampton\_University-OND

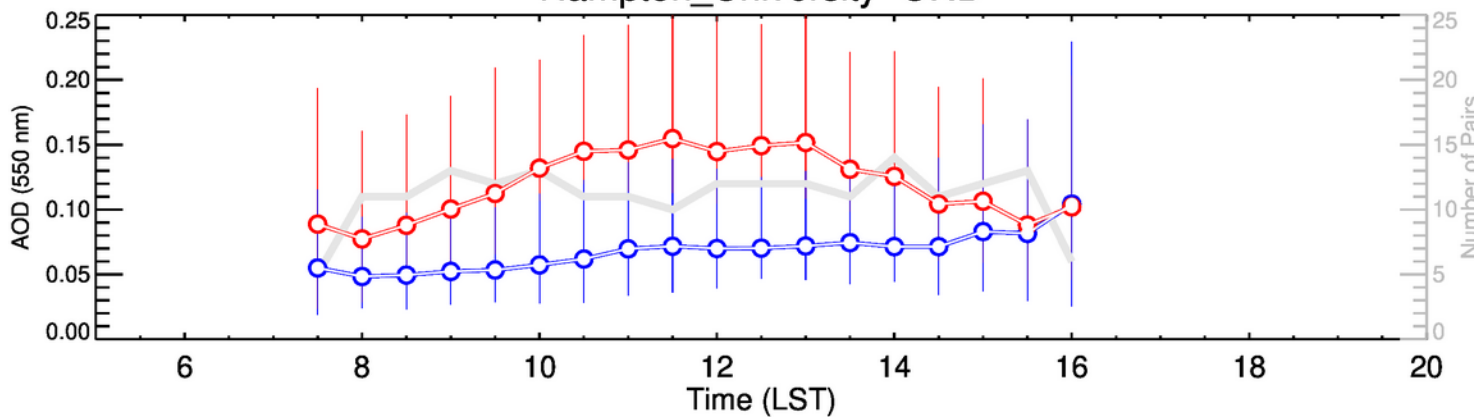

### Hampton\_University-JFM

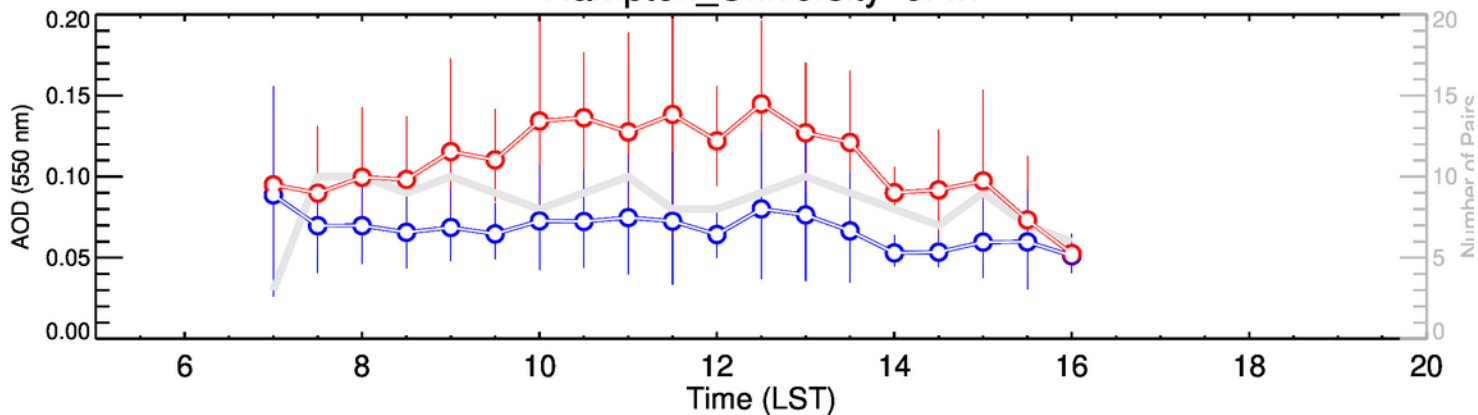



### Hankuk\_UFS-AMJ

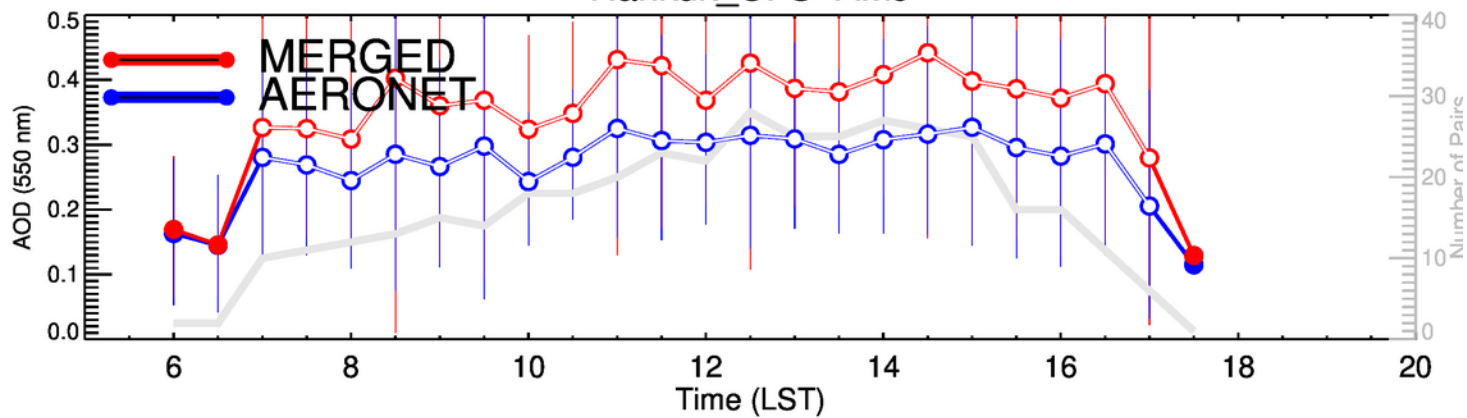

### Hankuk\_UFS-JAS

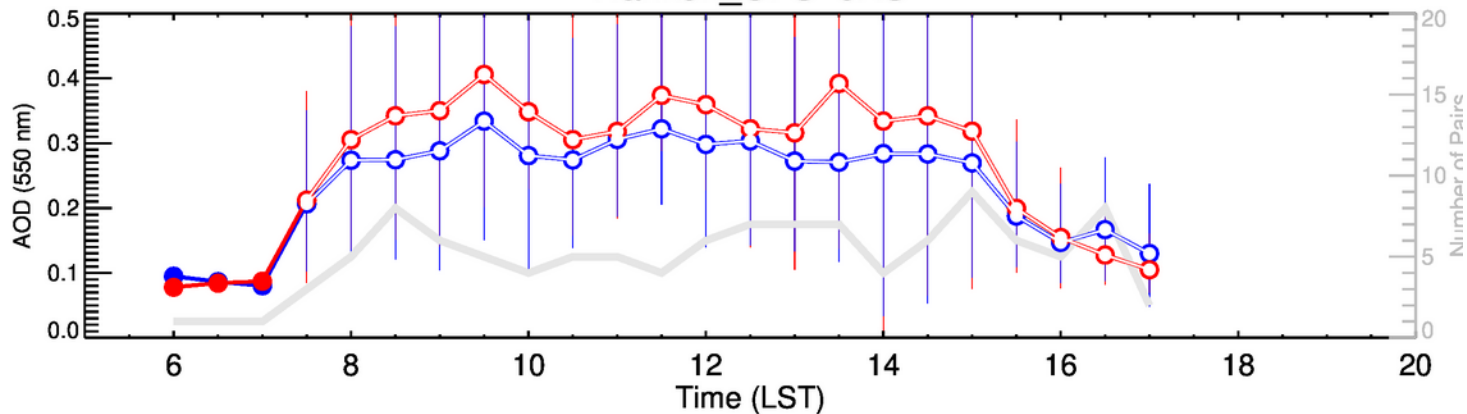

### Hankuk\_UFS-OND

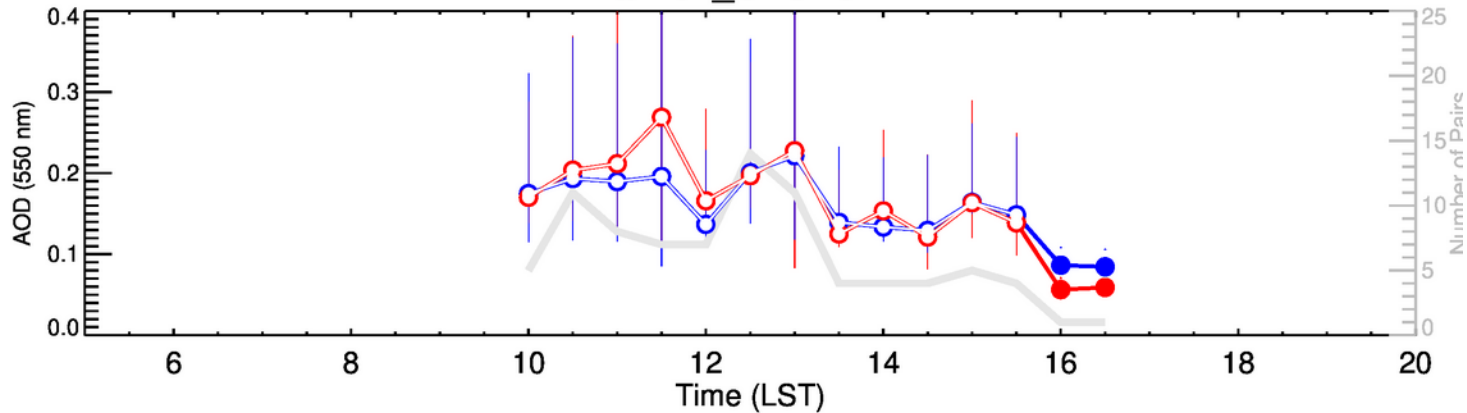

### Hankuk\_UFS-JFM

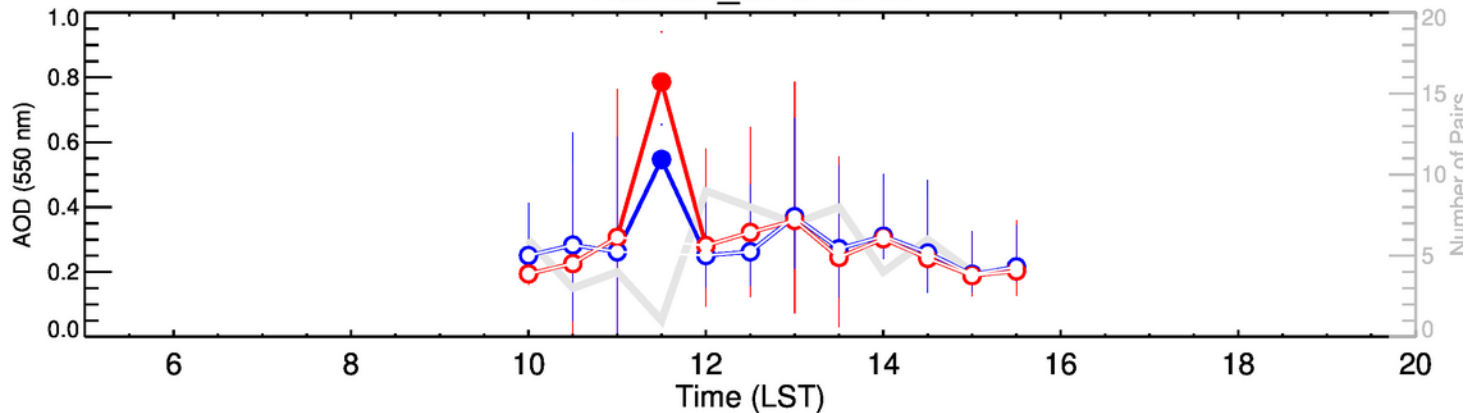

### IMAA\_Potenza-AMJ

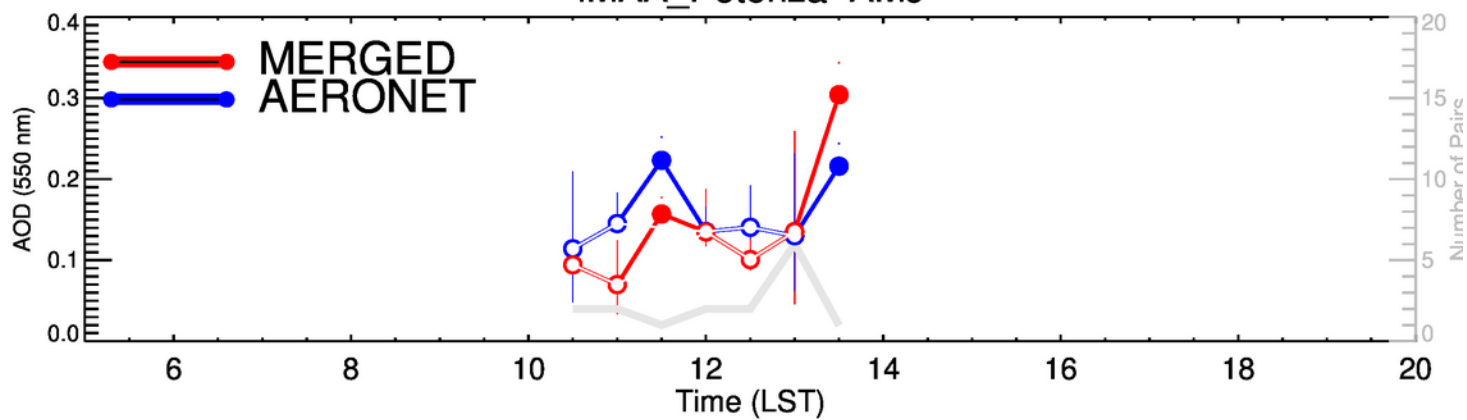

### IMAA\_Potenza-JAS

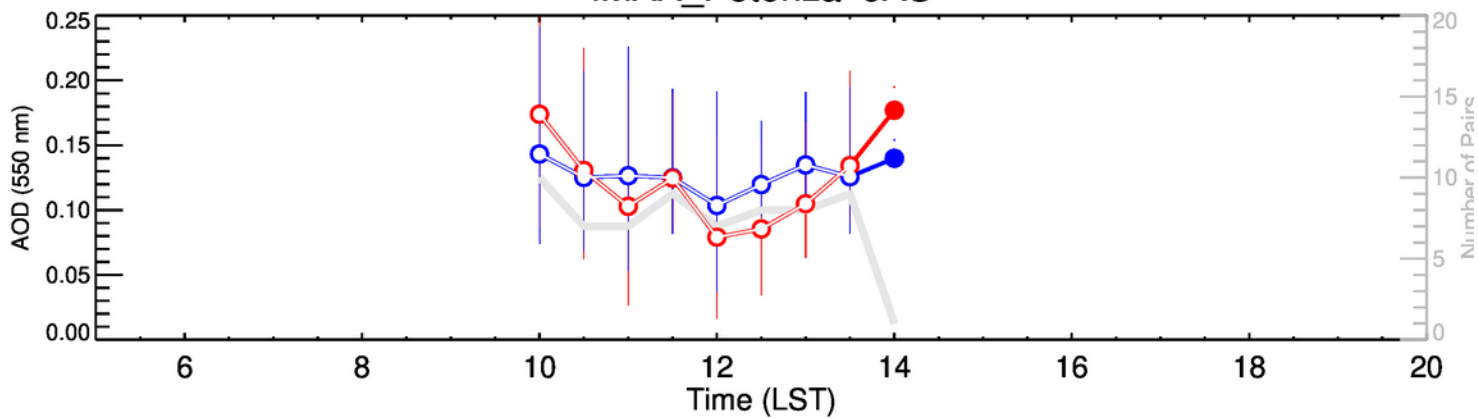

### IMAA\_Potenza-OND

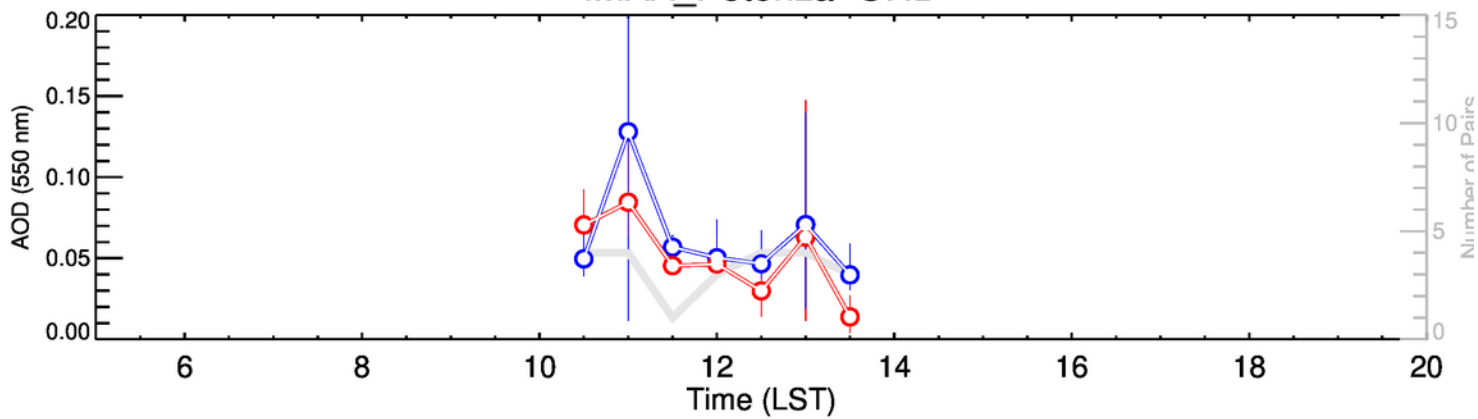

### IMPROVE-MammothCave-AMJ

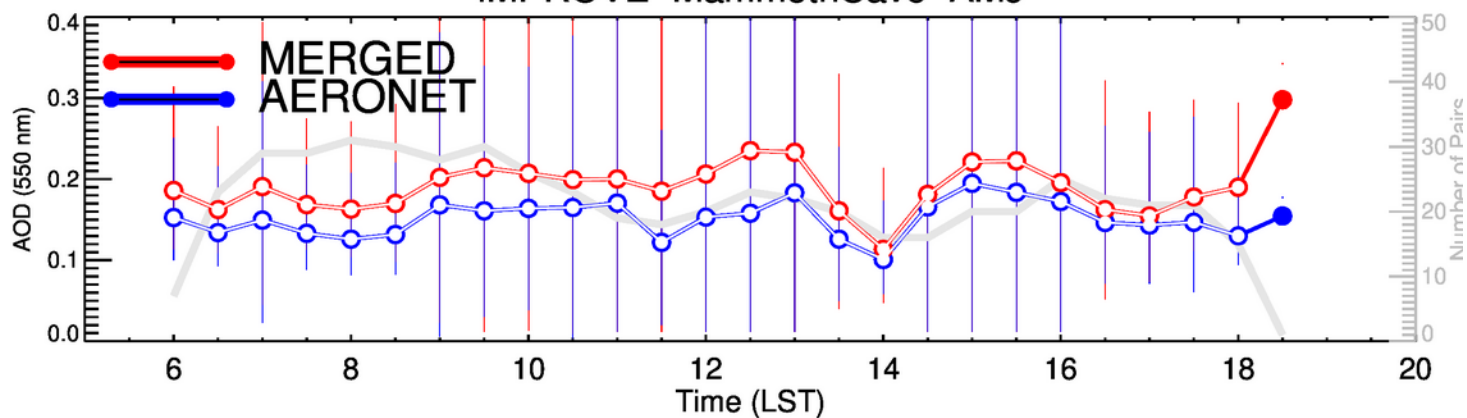

### IMPROVE-MammothCave-JAS

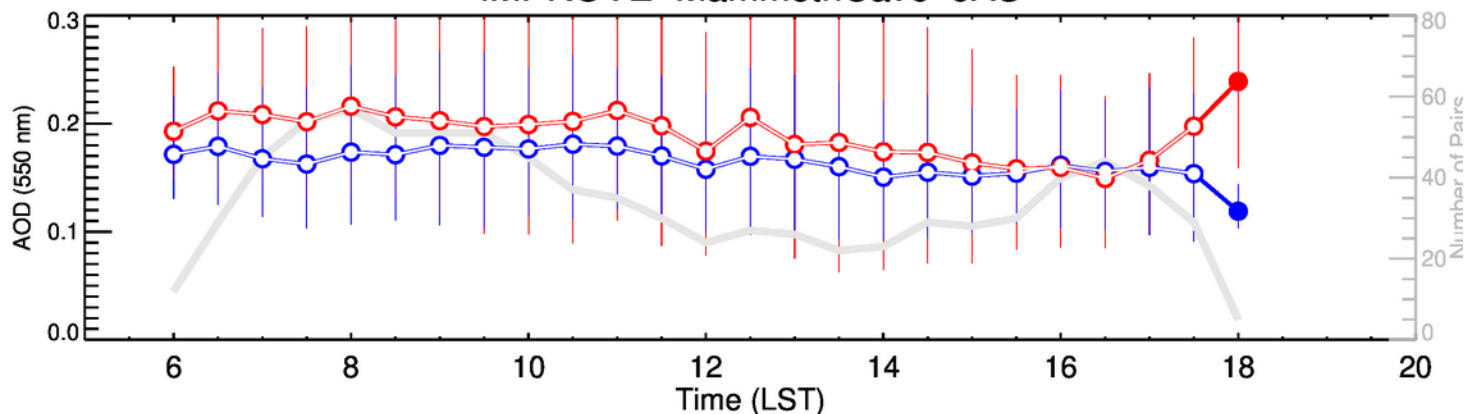

### IMPROVE-MammothCave-OND

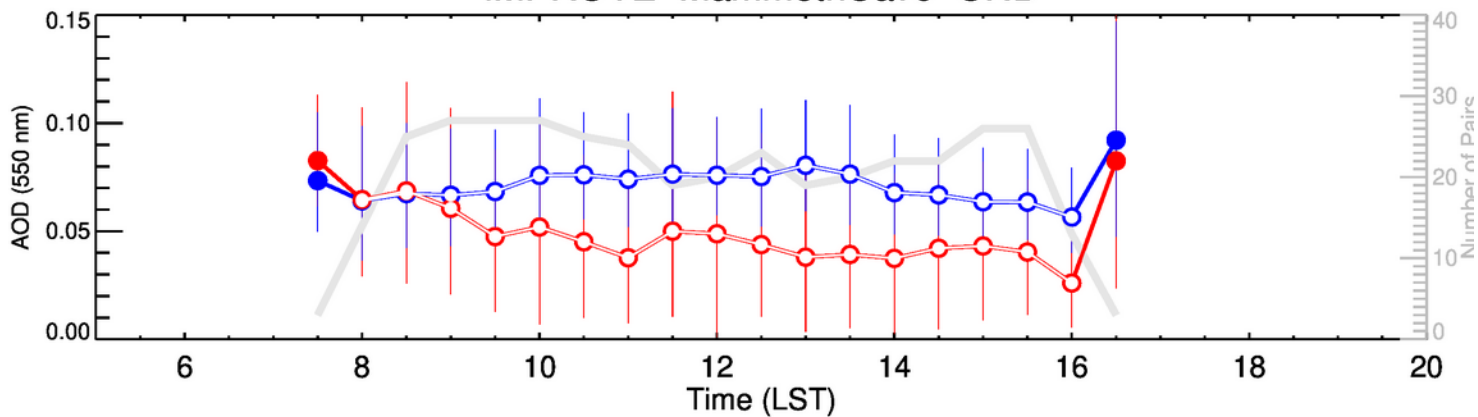

### IMPROVE-MammothCave-JFM

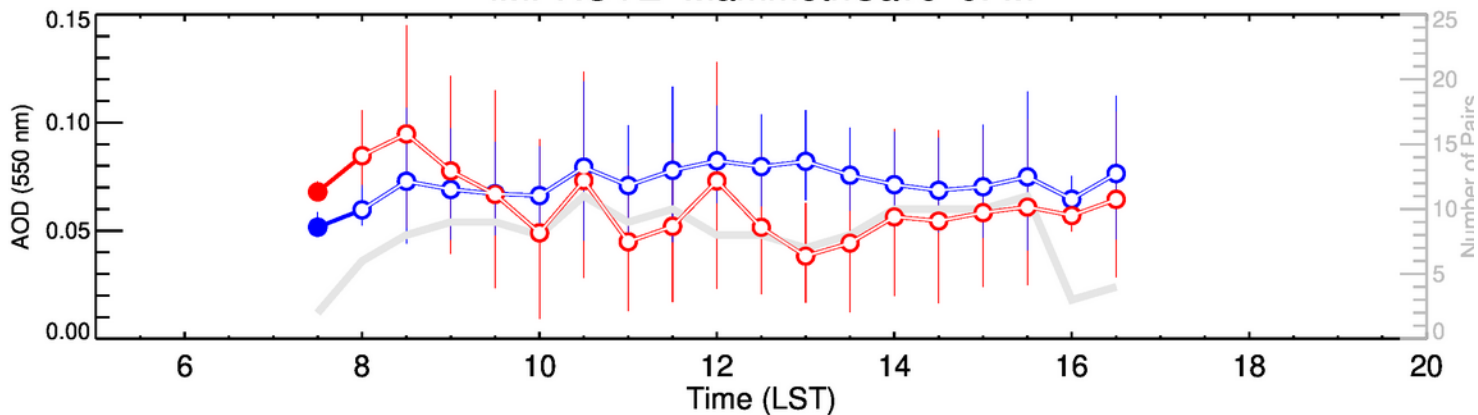

### IMS-METU-ERDEMLI-AMJ

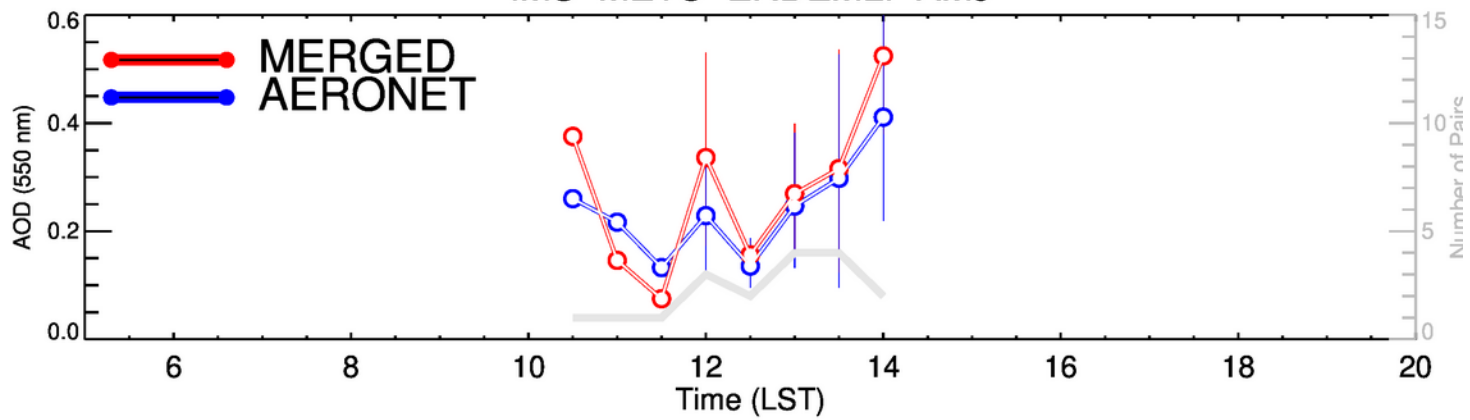

### IMS-METU-ERDEMLI-JFM

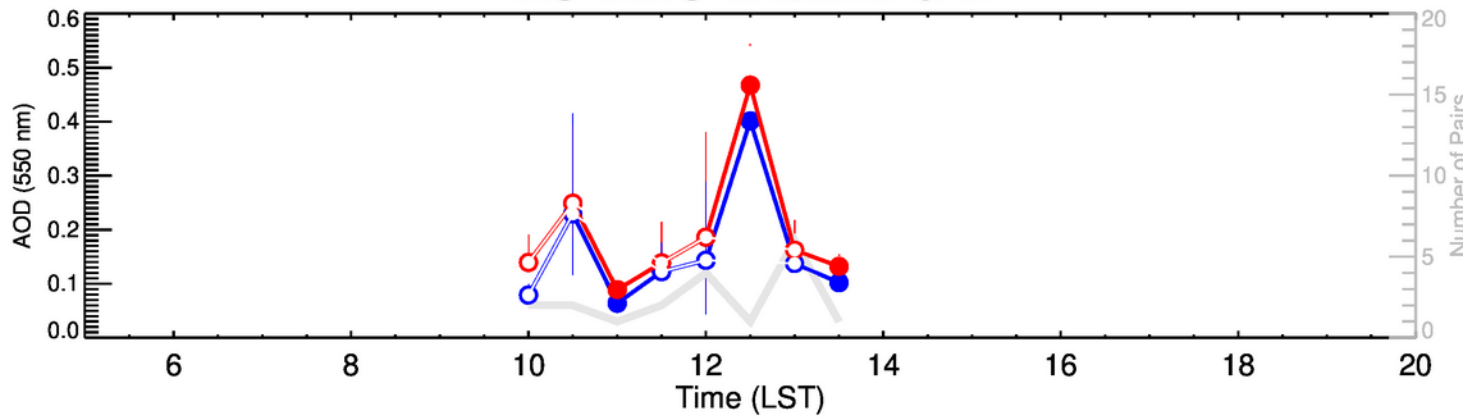

### Itajuba-AMJ

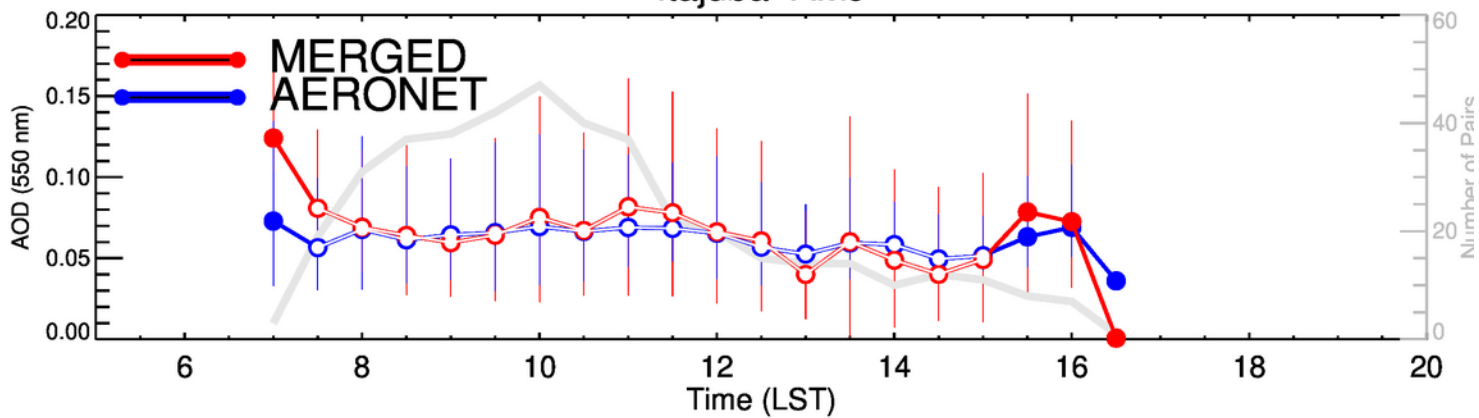

### Itajuba-JAS

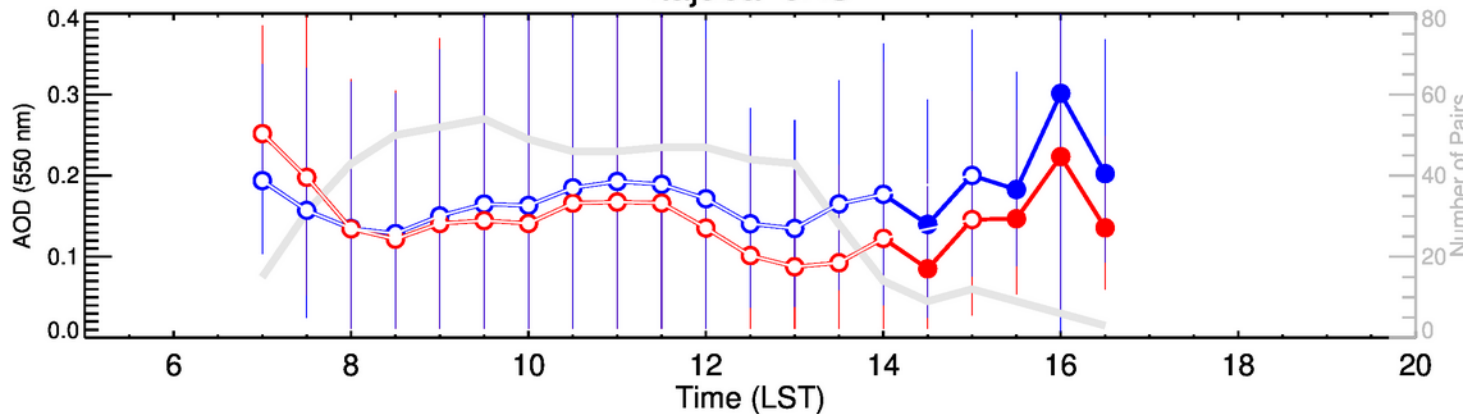

### Itajuba-OND

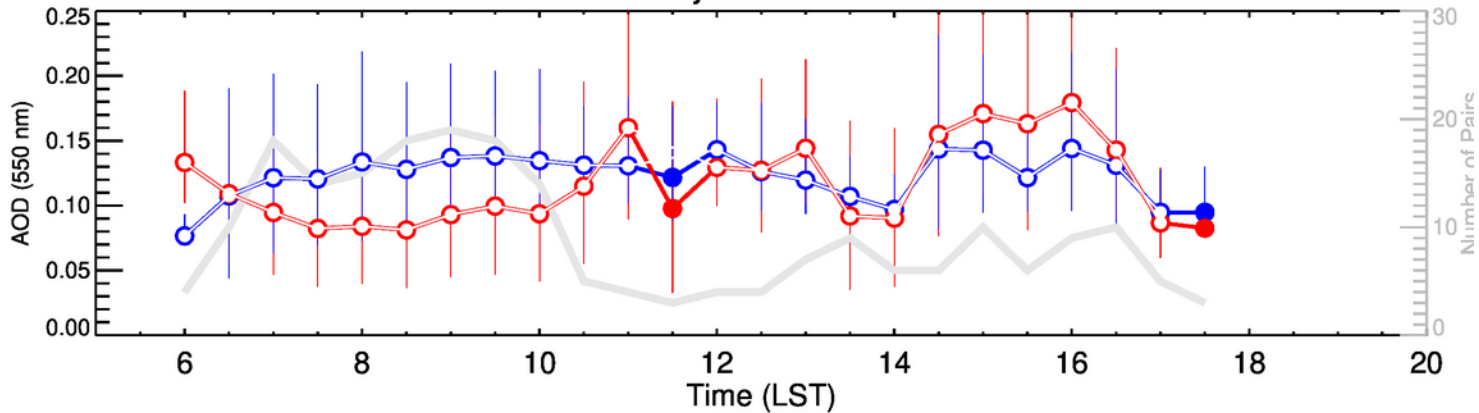

### Itajuba-JFM

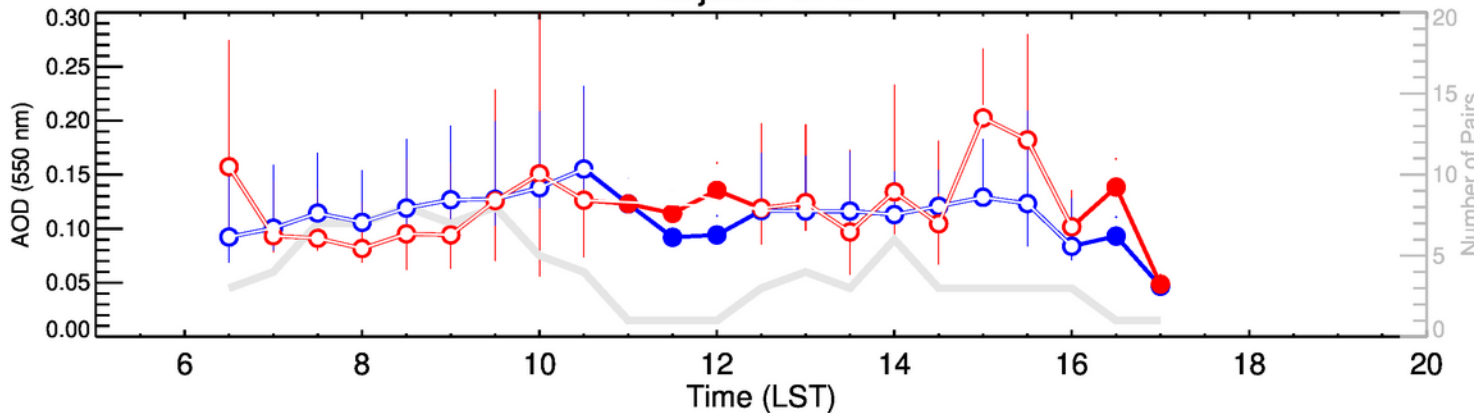

### Izana-AMJ

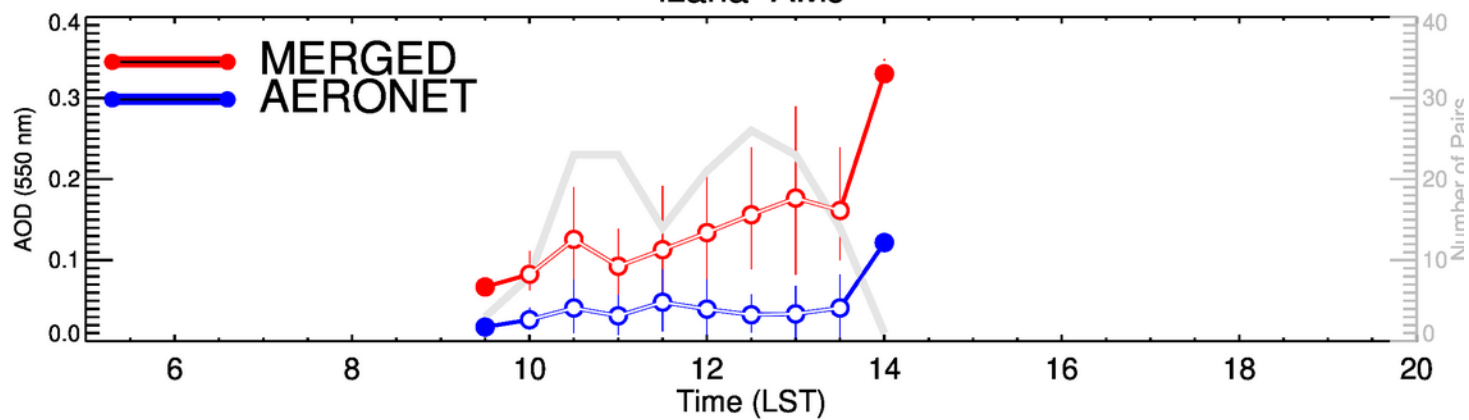

### Izana-JAS

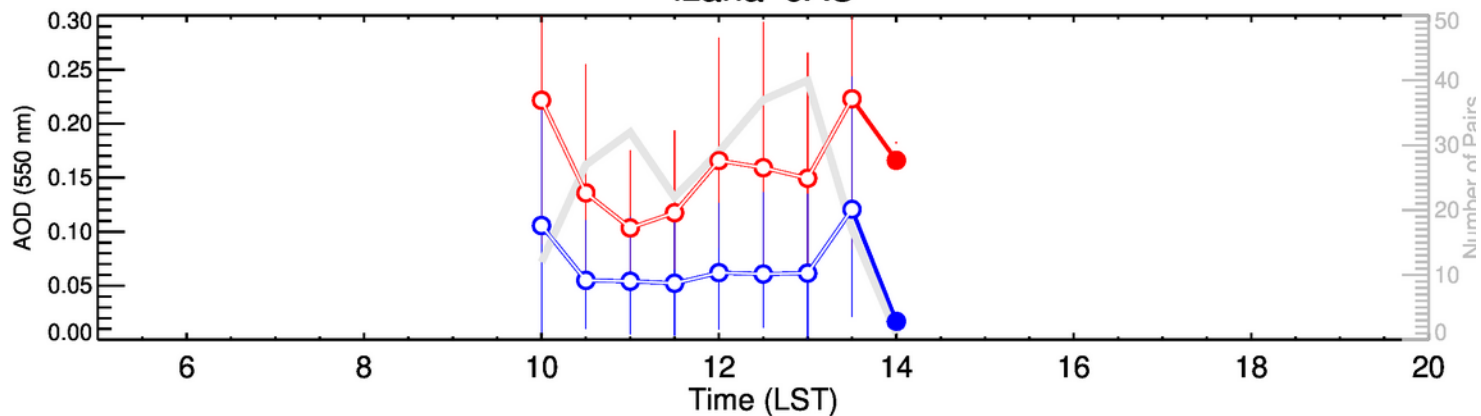

### Izana-OND

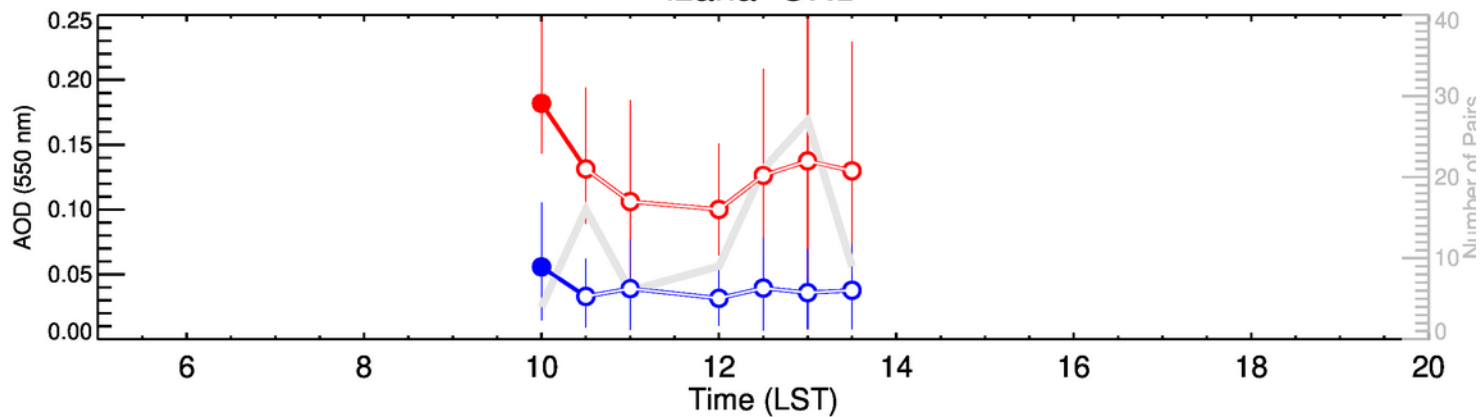

### Izana-JFM

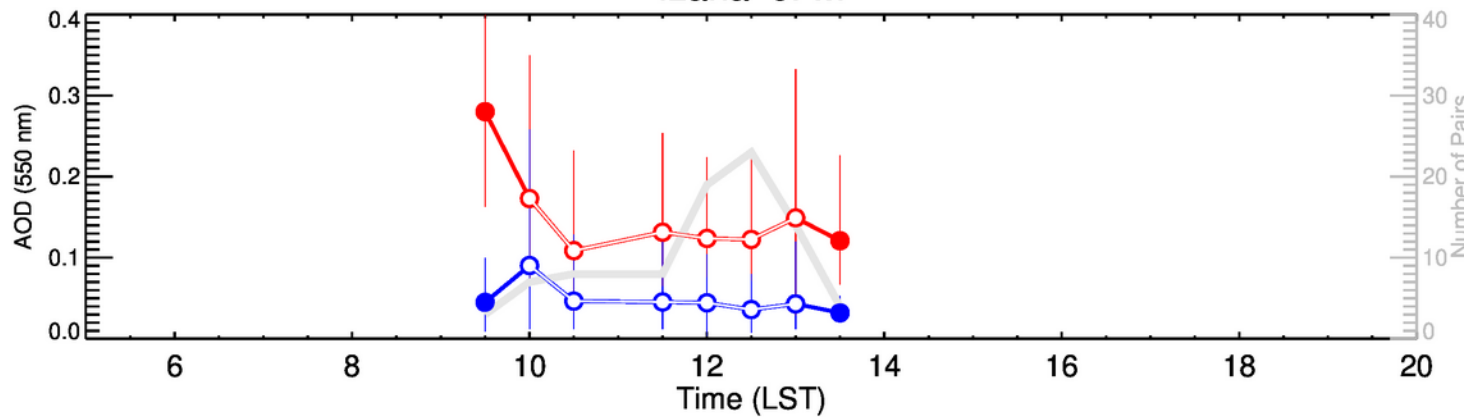

Jabiru-AMJ

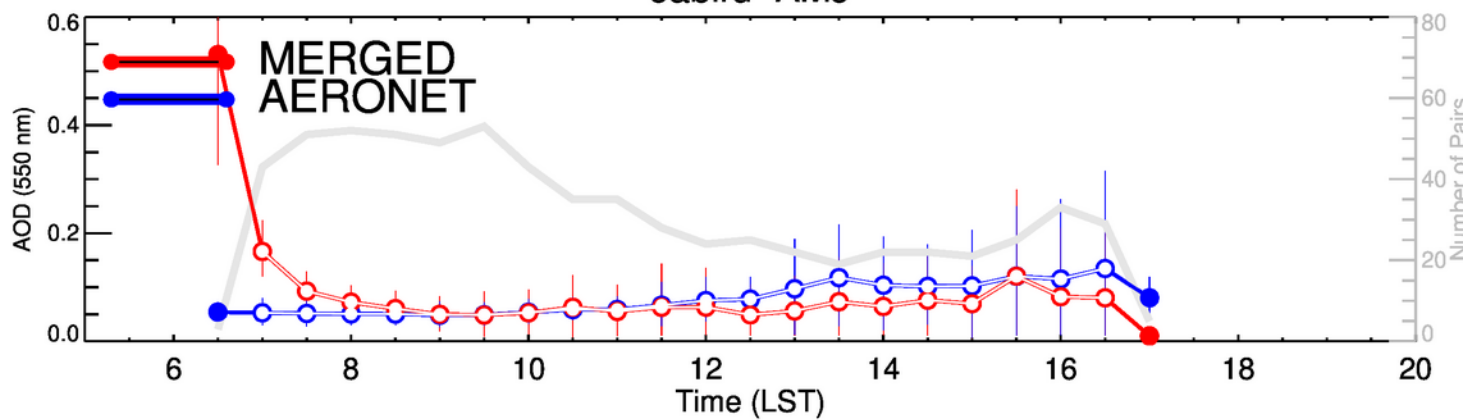

Jabiru-JAS

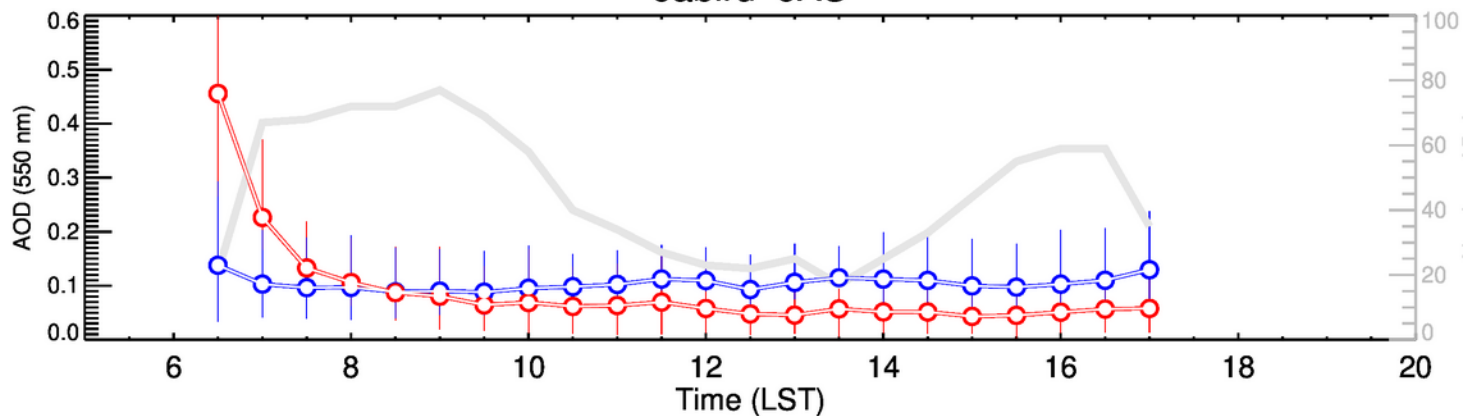

Jabiru-OND

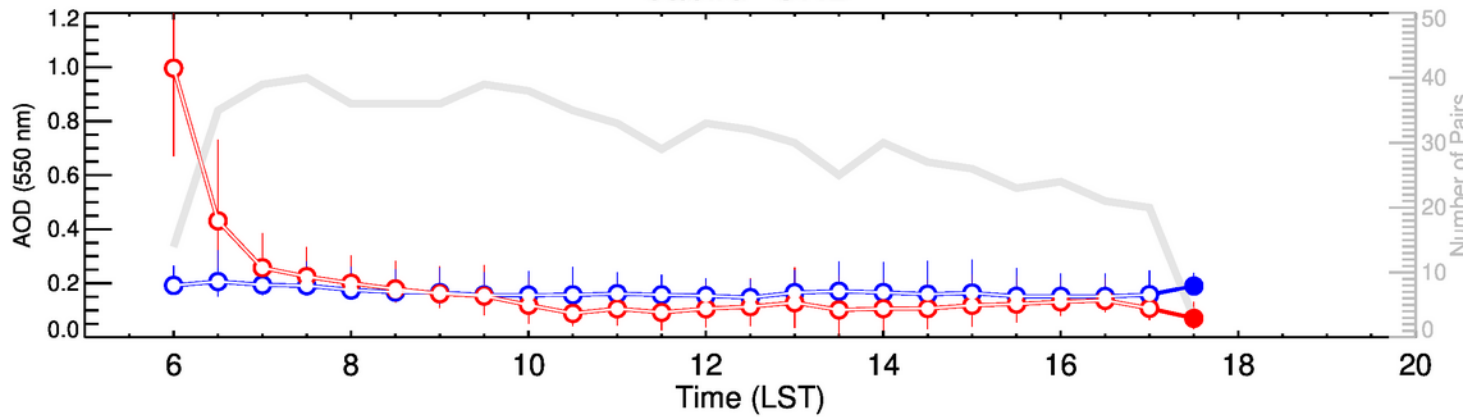

Jabiru-JFM

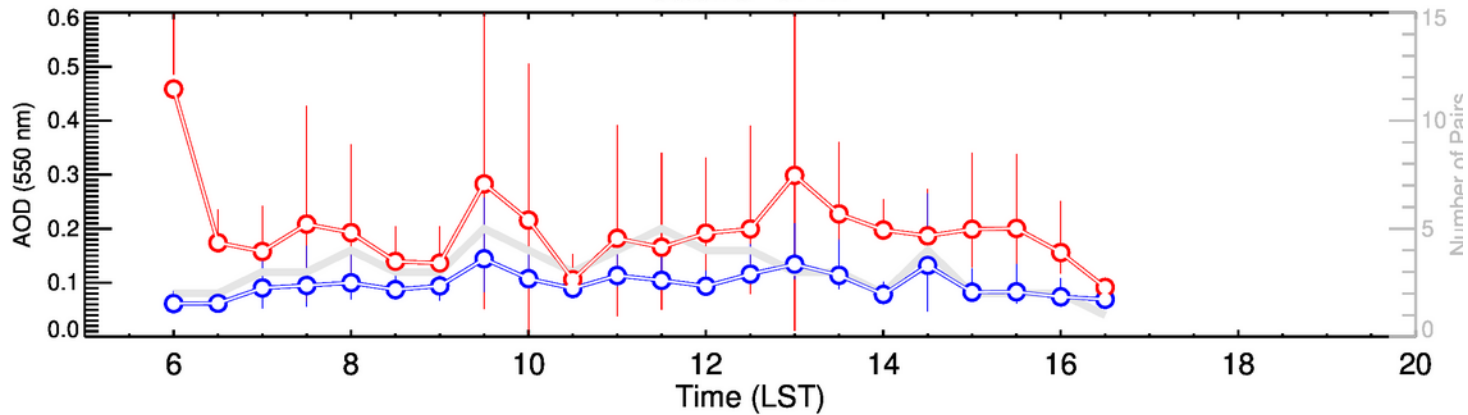

### Jambi-AMJ

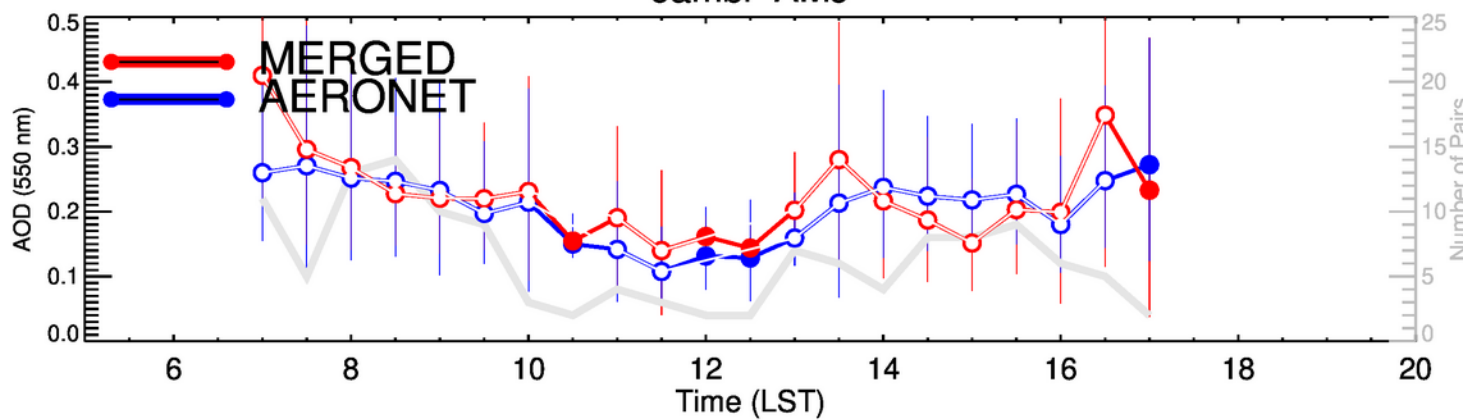

### Jambi-JAS

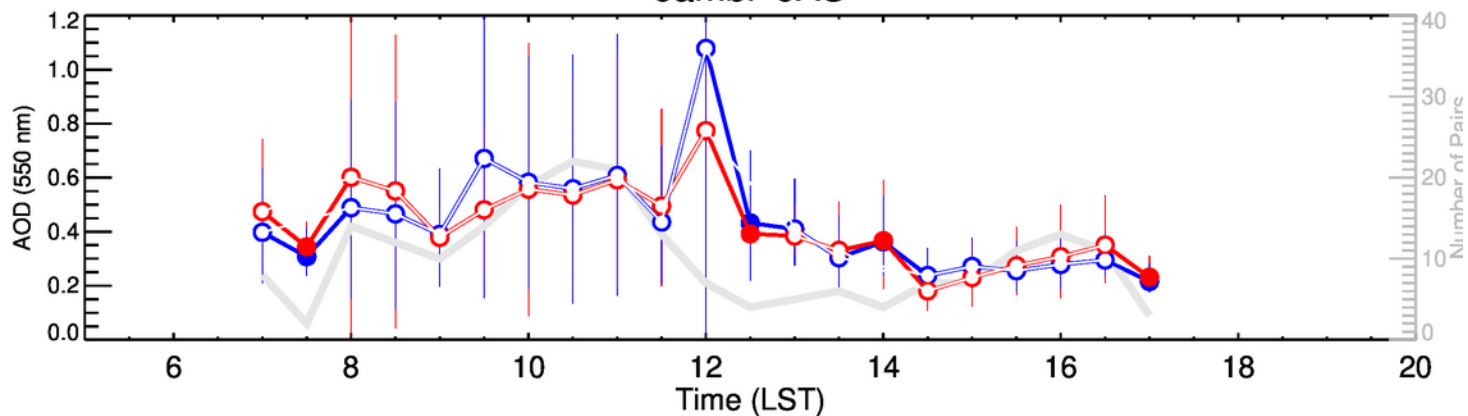

### Jambi-OND

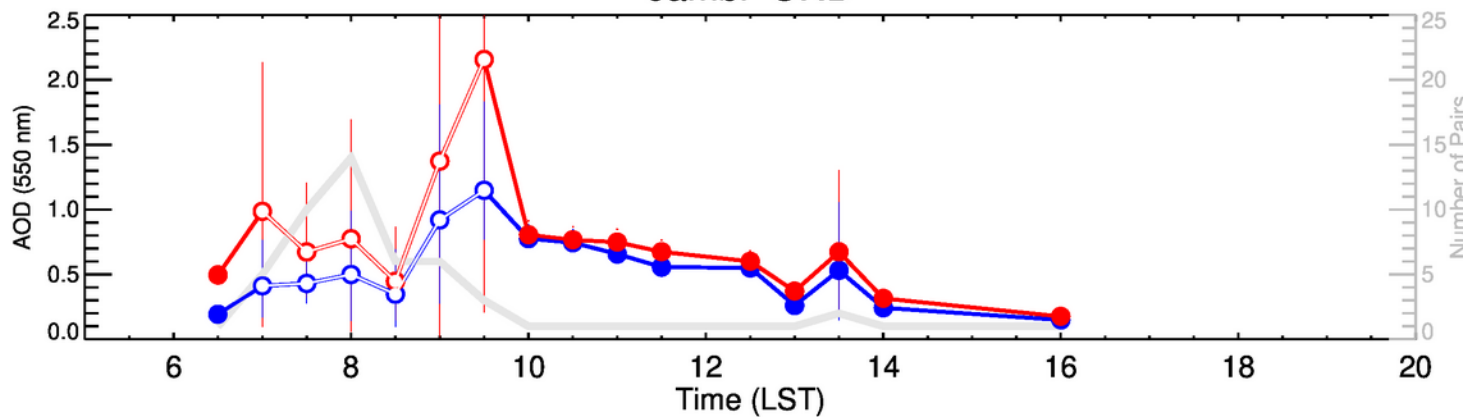

### Jambi-JFM

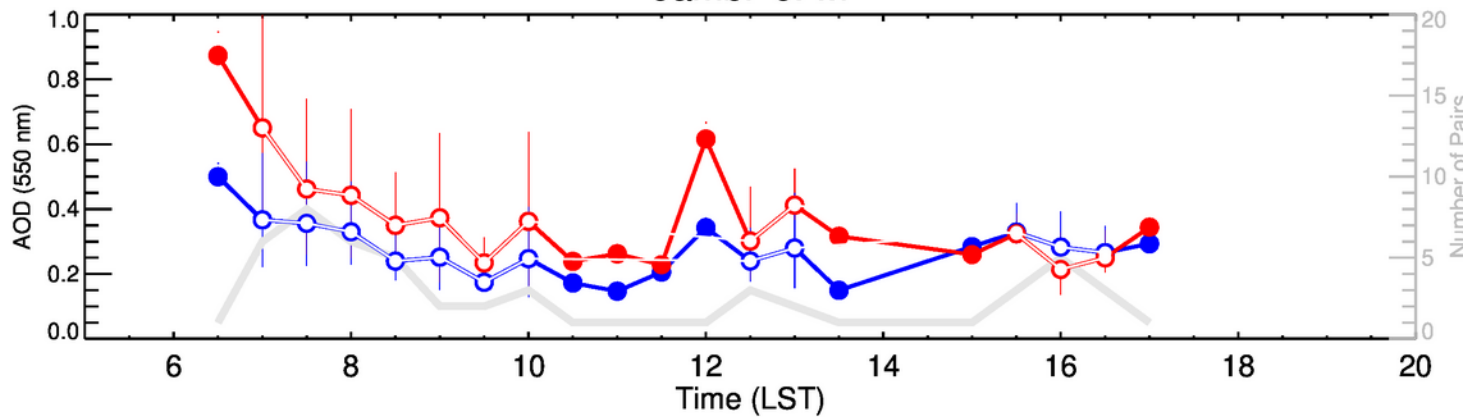



### Ji\_Parana\_SE-AMJ

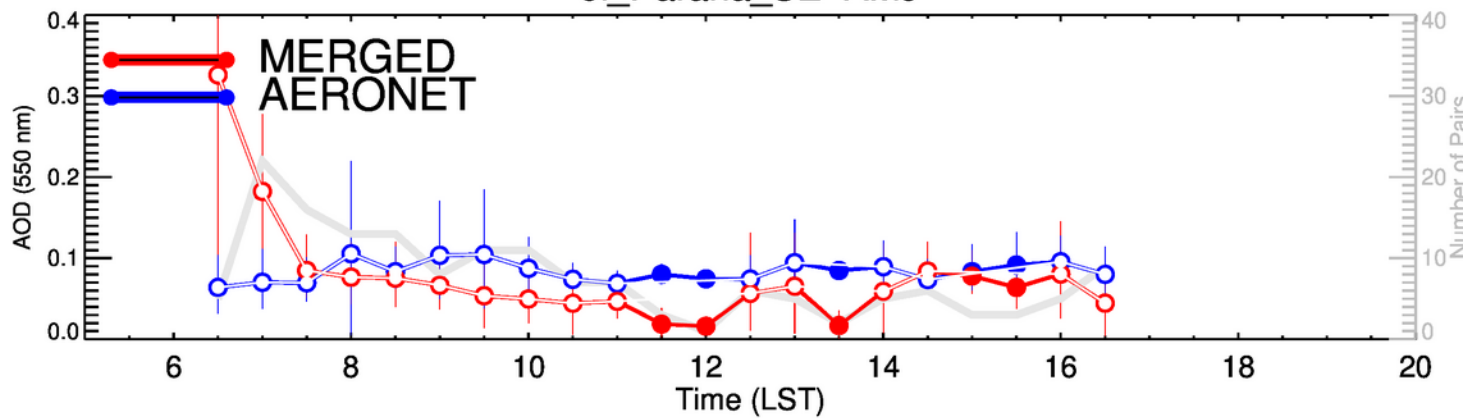

### Ji\_Parana\_SE-JAS

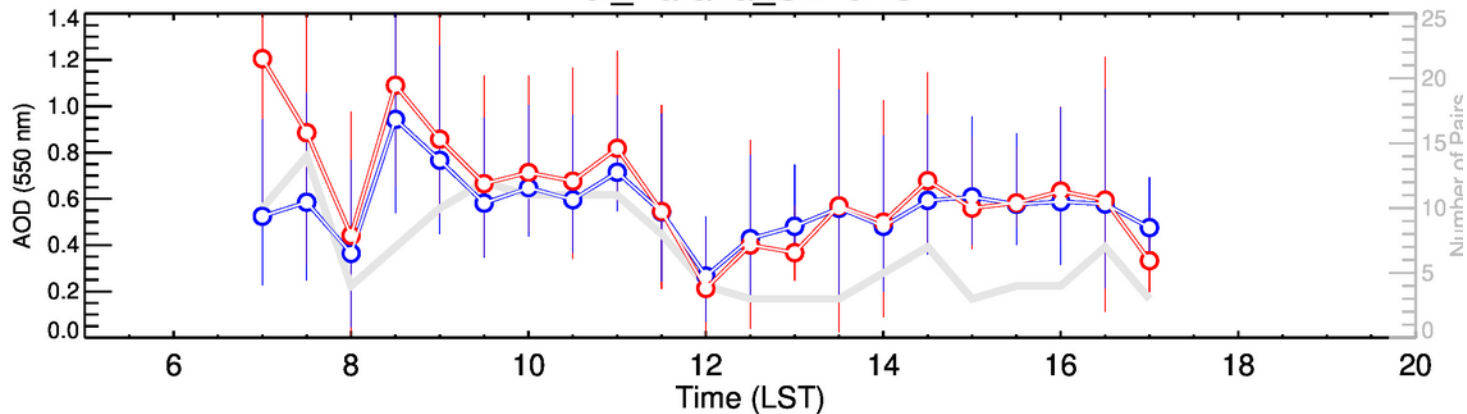

### Ji\_Parana\_SE-OND

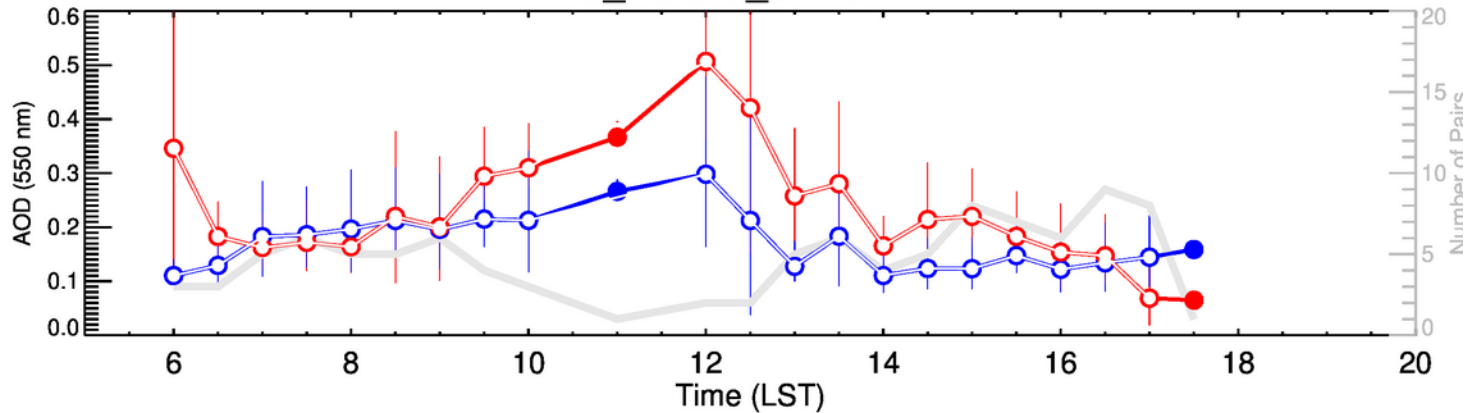

### Ji\_Parana\_SE-JFM

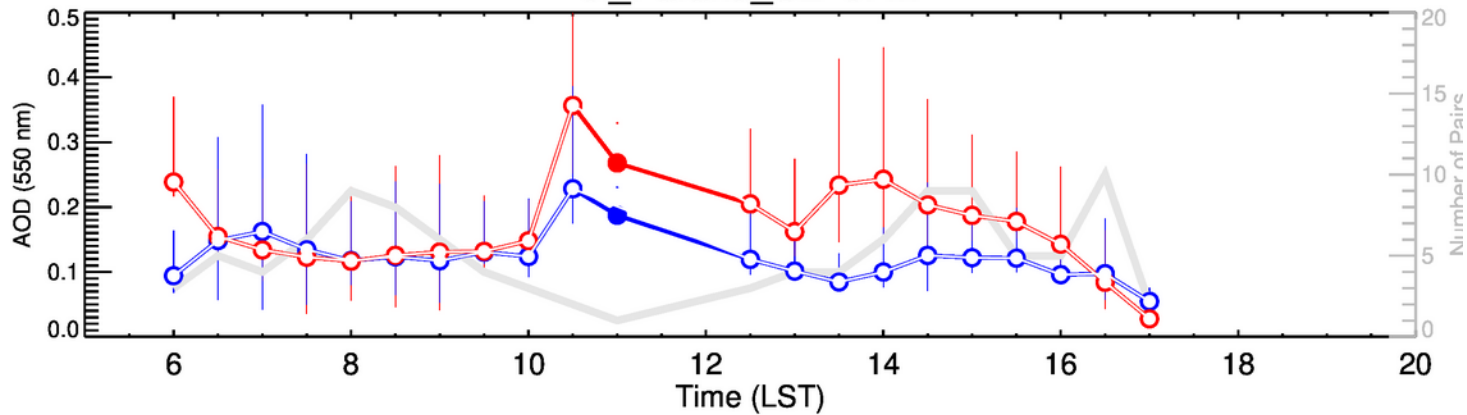

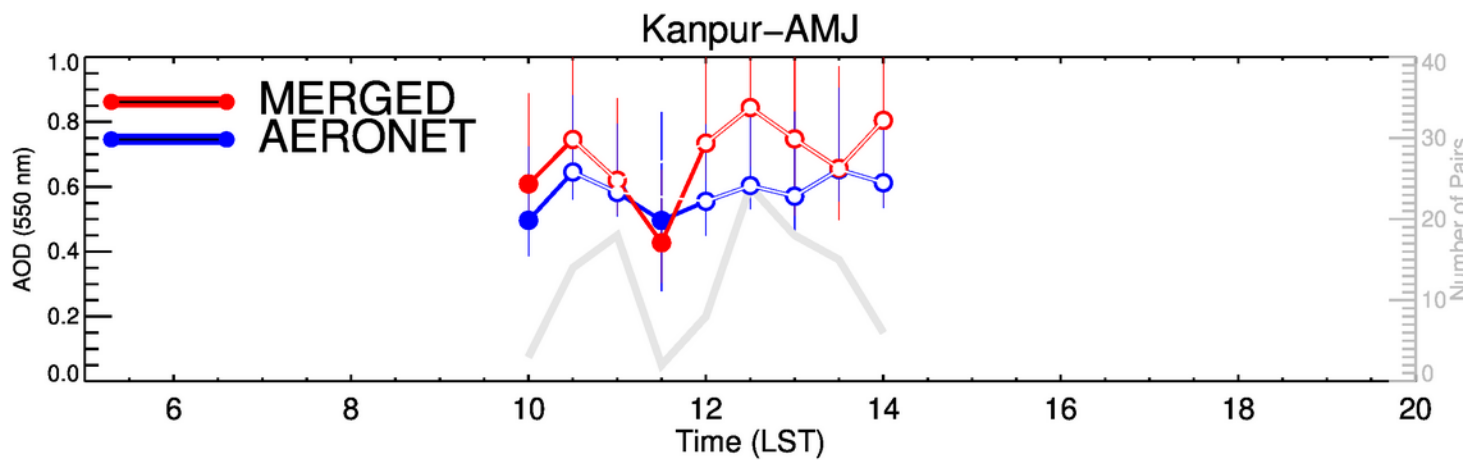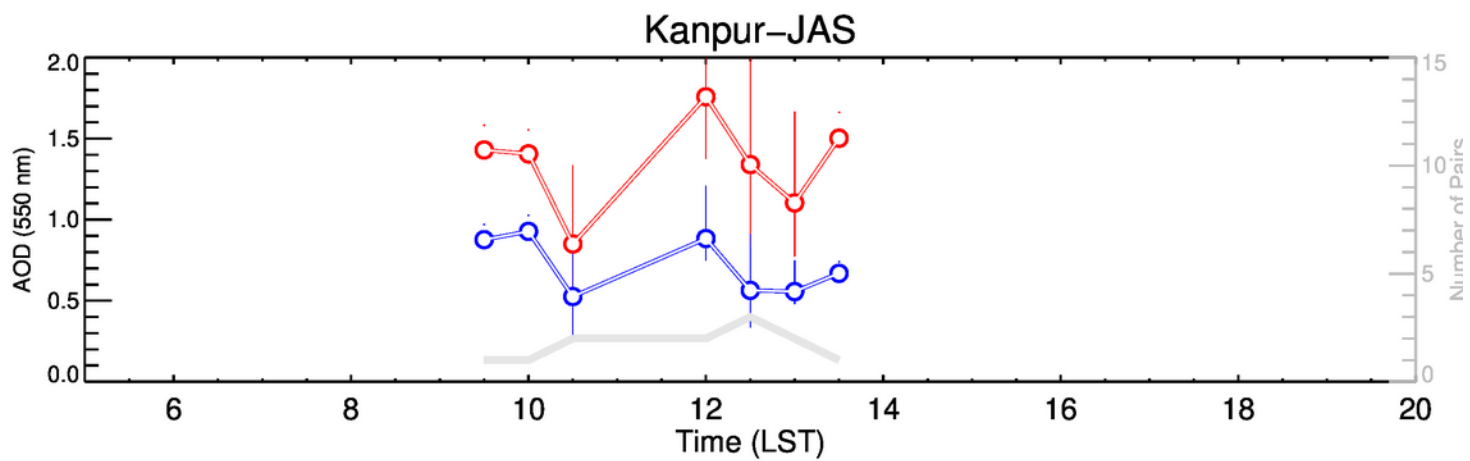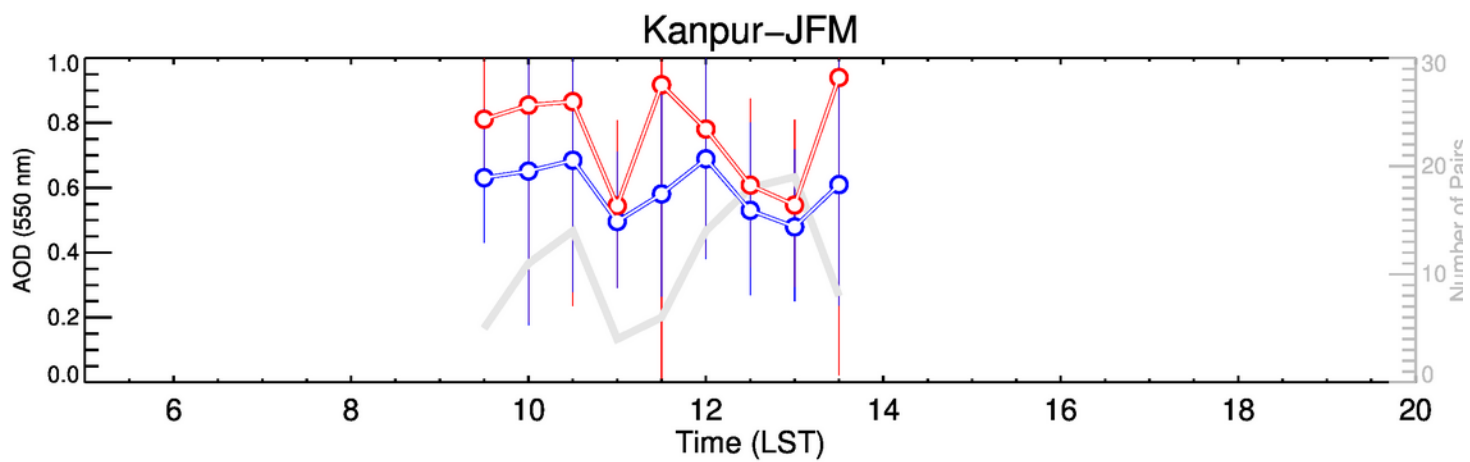

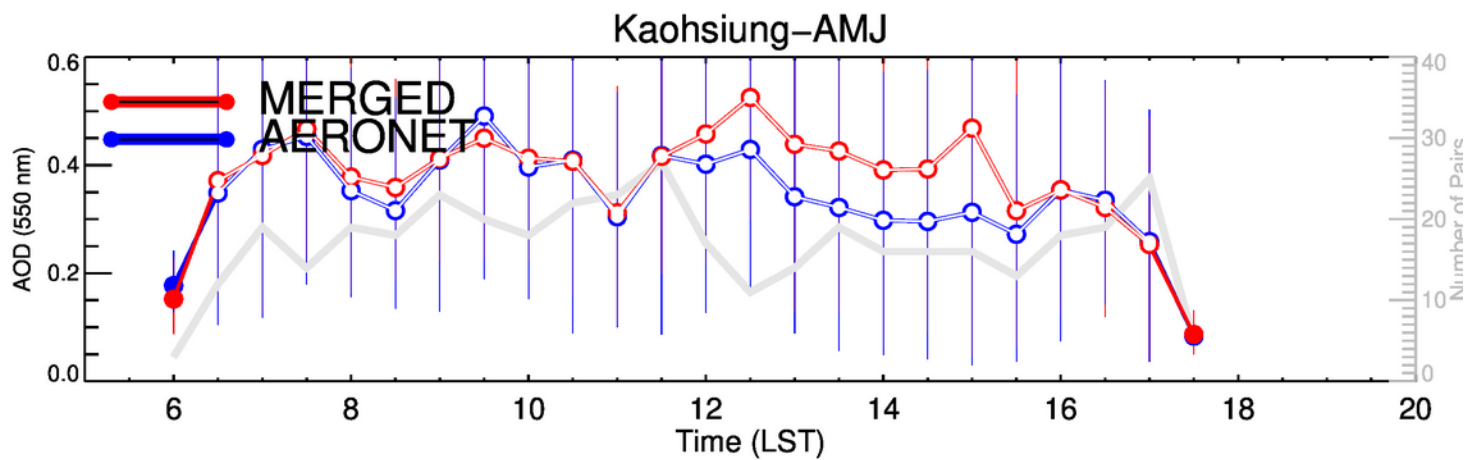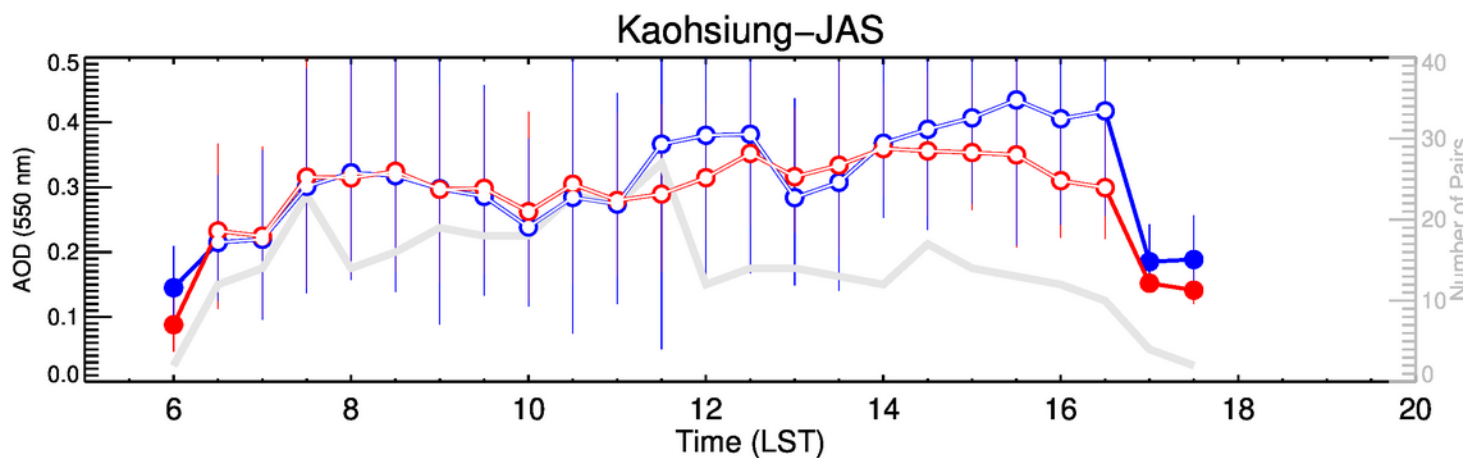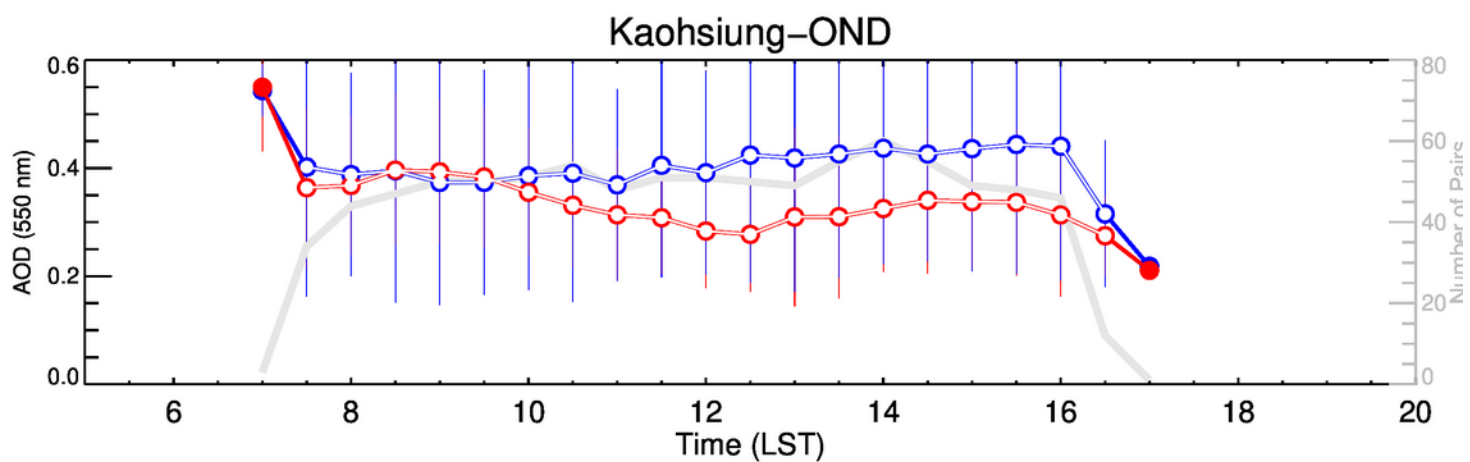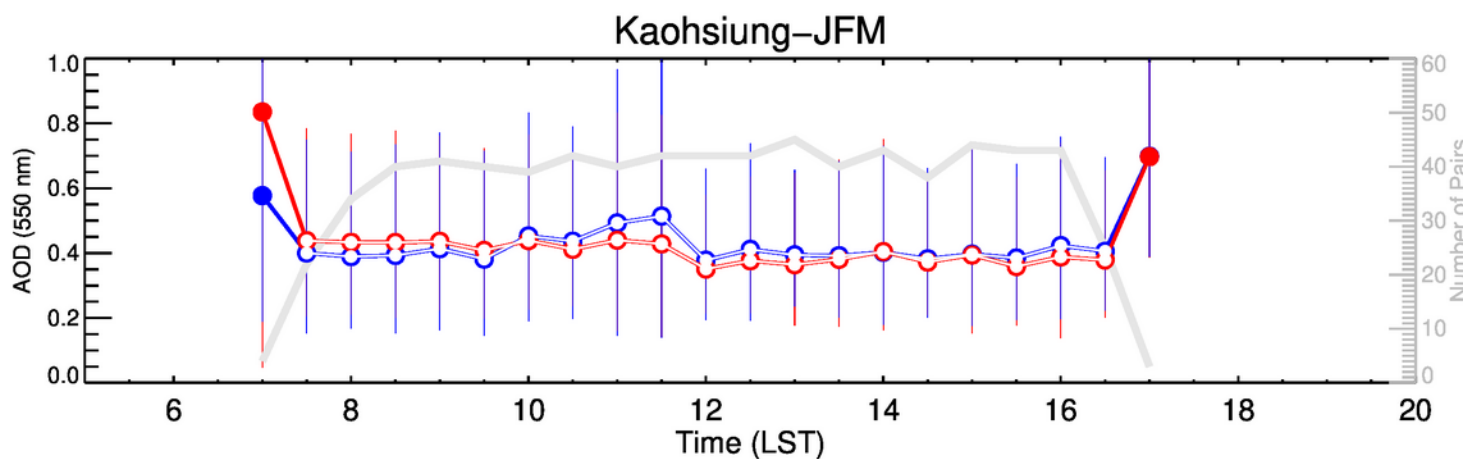

### Karlsruhe-AMJ

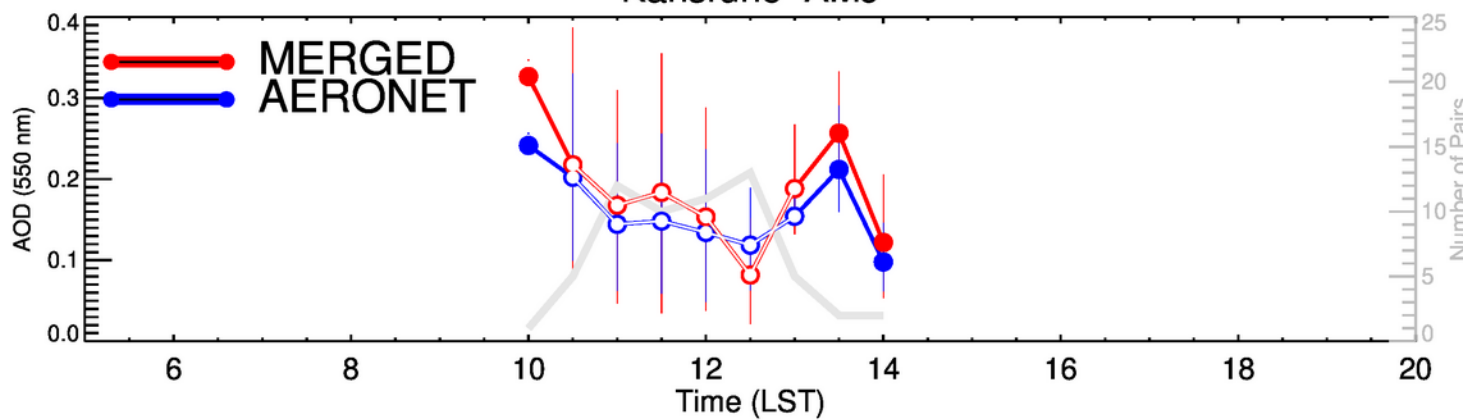

### Karlsruhe-JAS

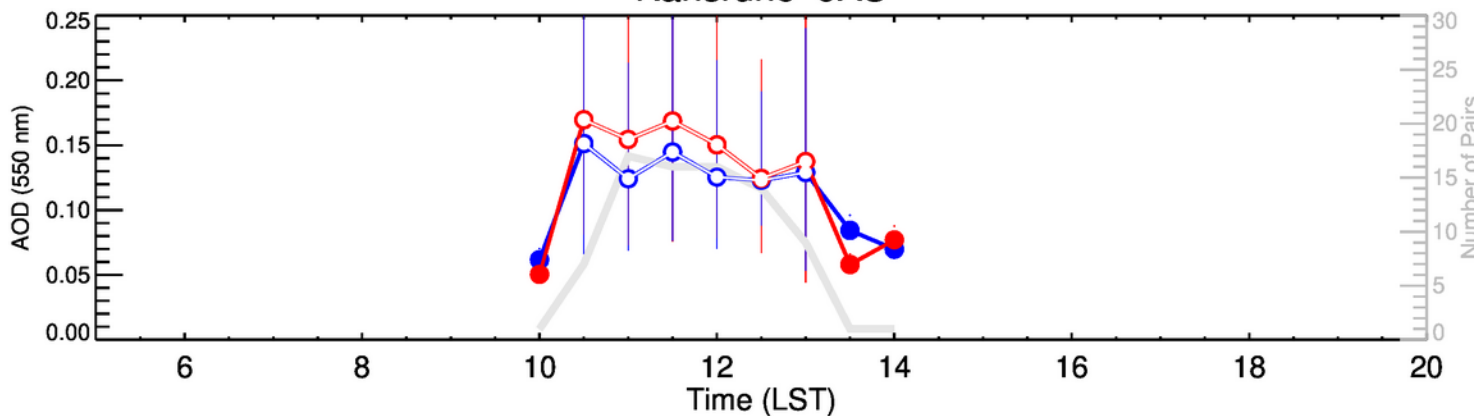

### Karlsruhe-JFM

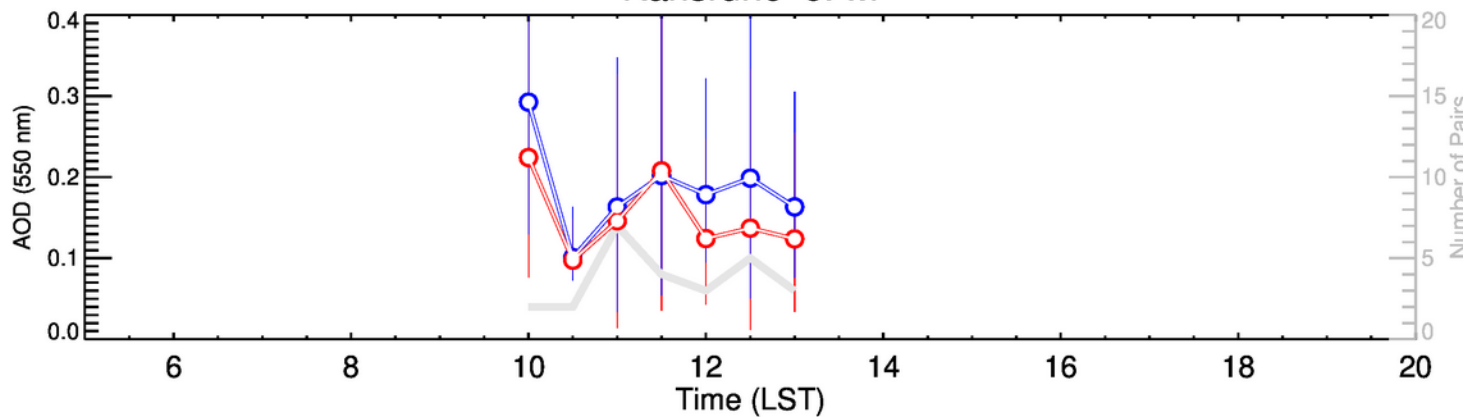

### Kellogg\_LTER-AMJ

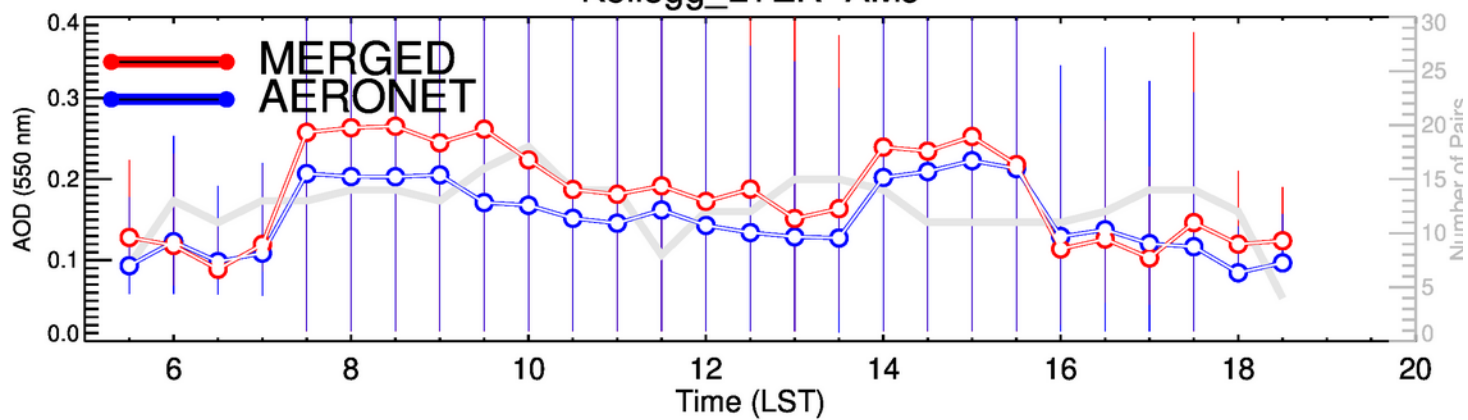

### Kellogg\_LTER-JAS

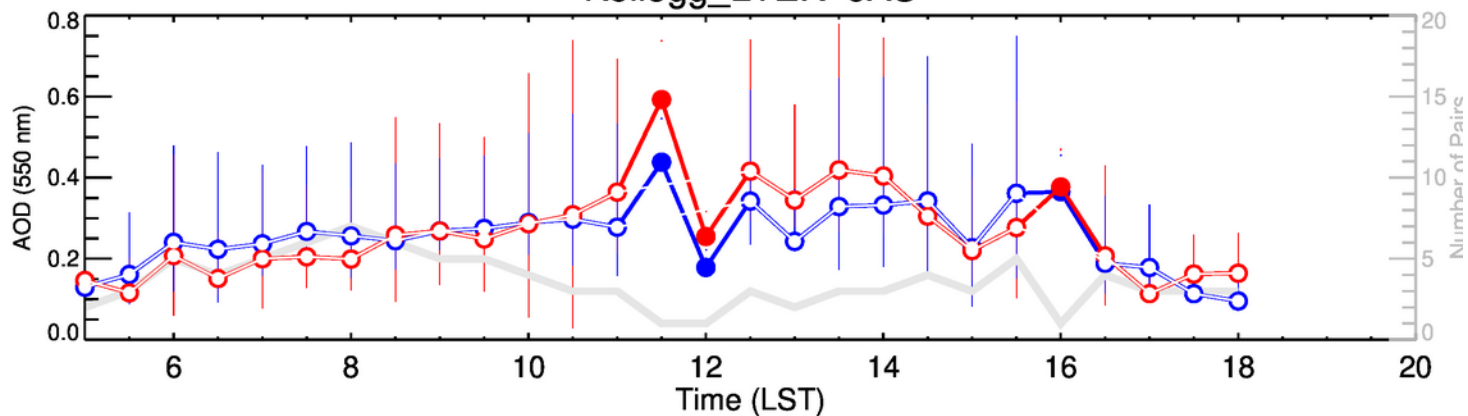

### Kellogg\_LTER-OND

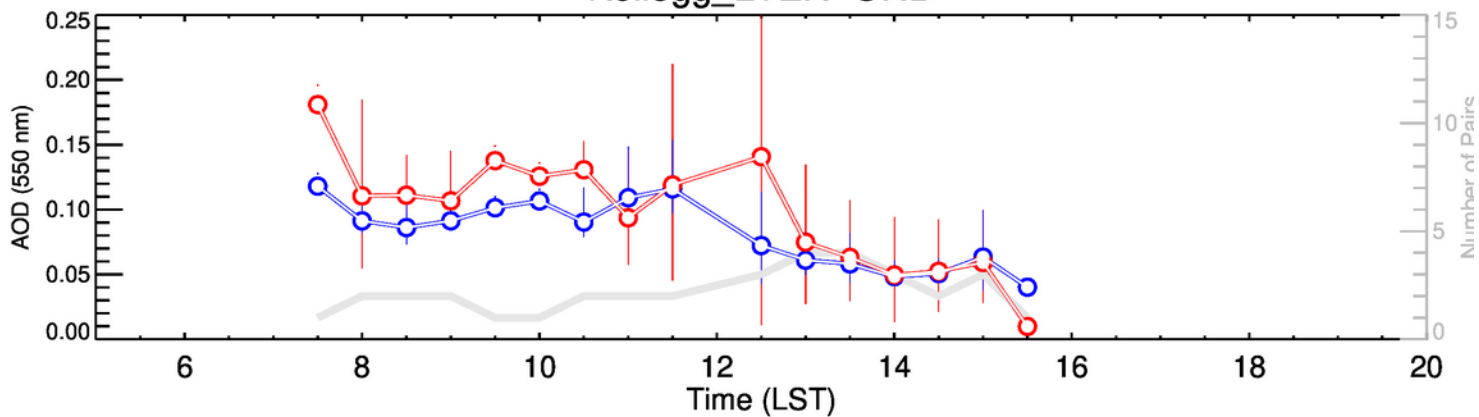

### Kellogg\_LTER-JFM

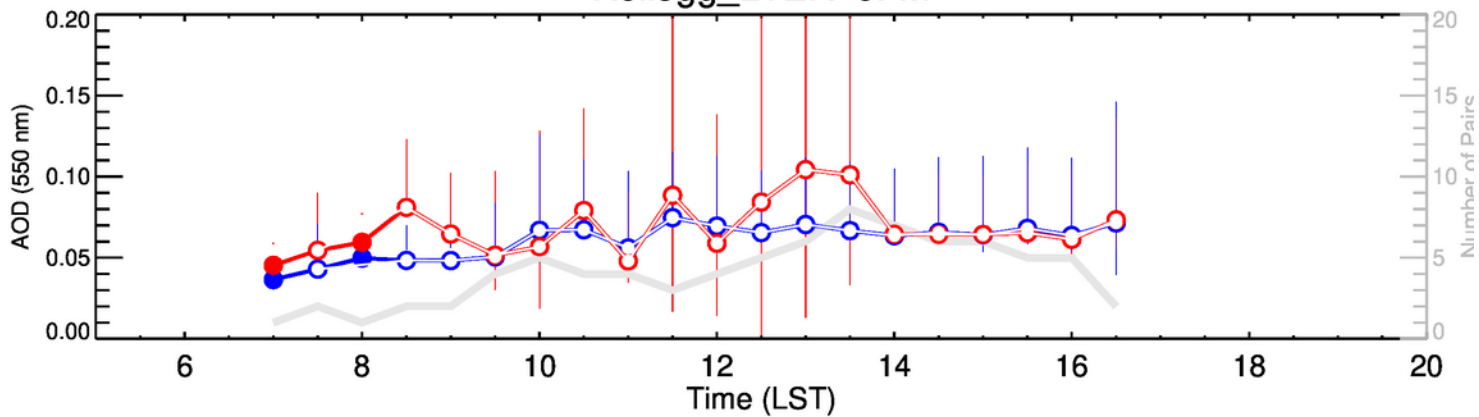

### Kuching-AMJ

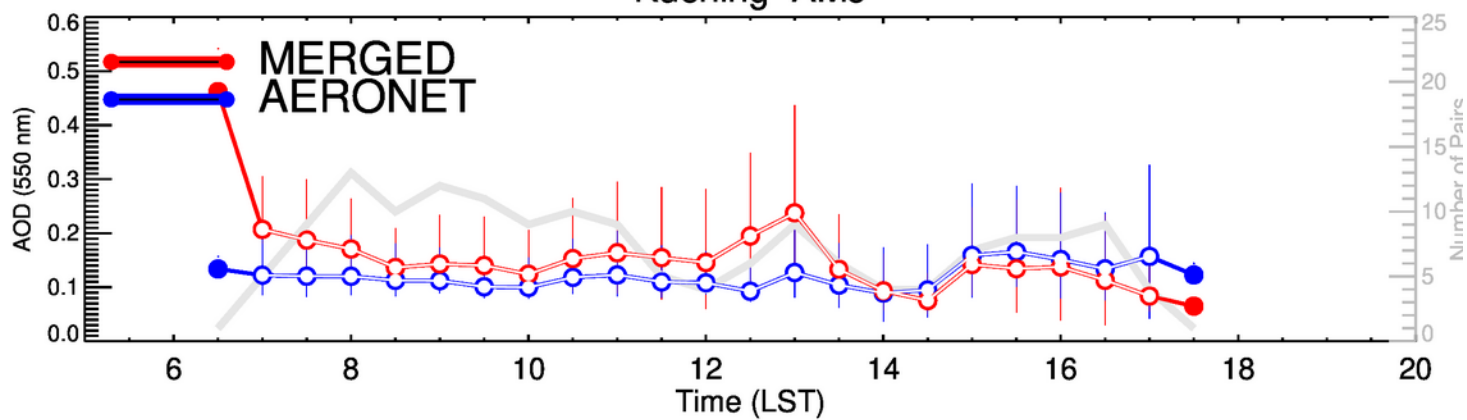

### Kuching-JAS

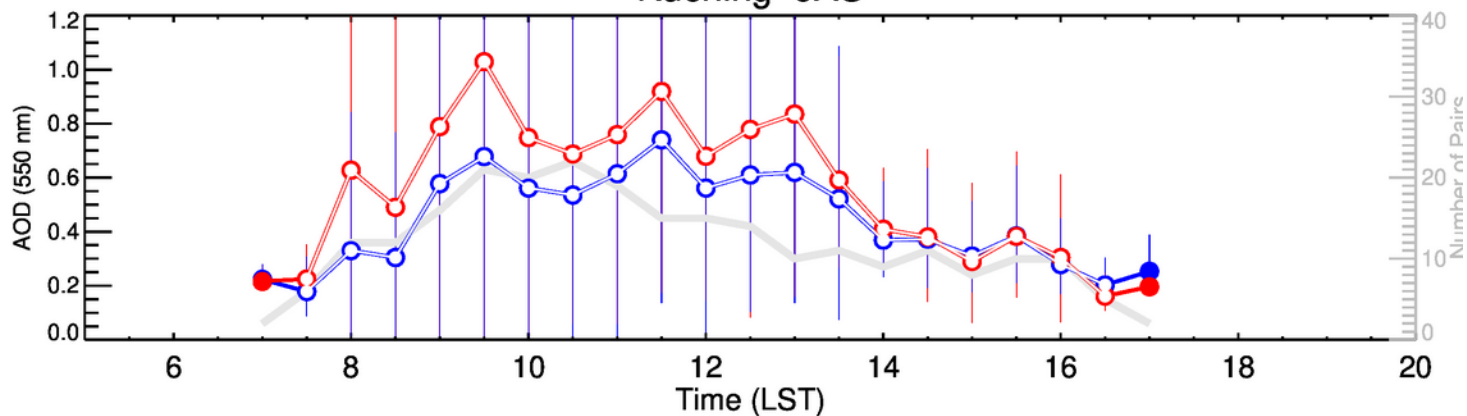

### Kuching-OND

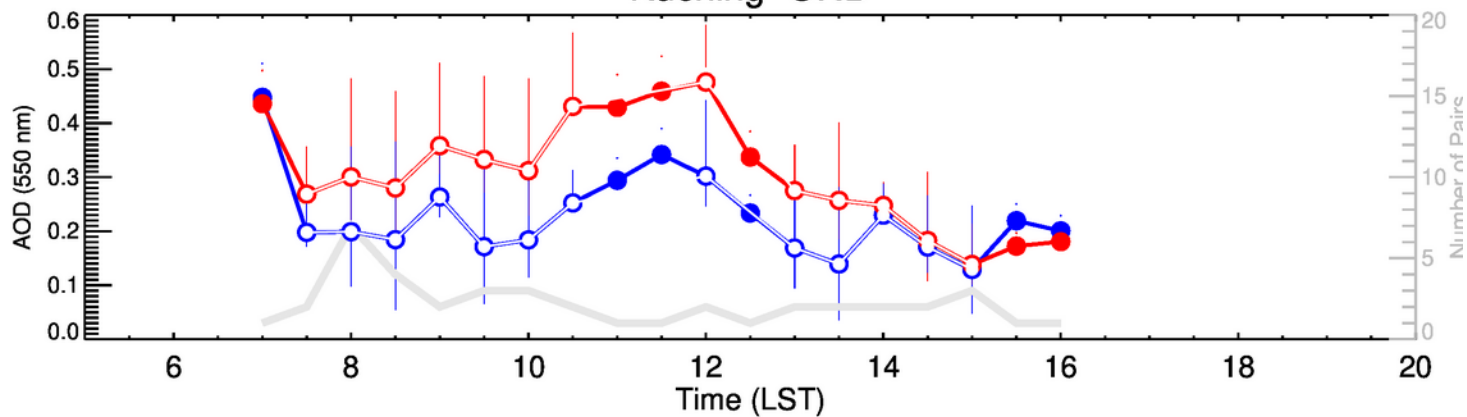

### Kuching-JFM

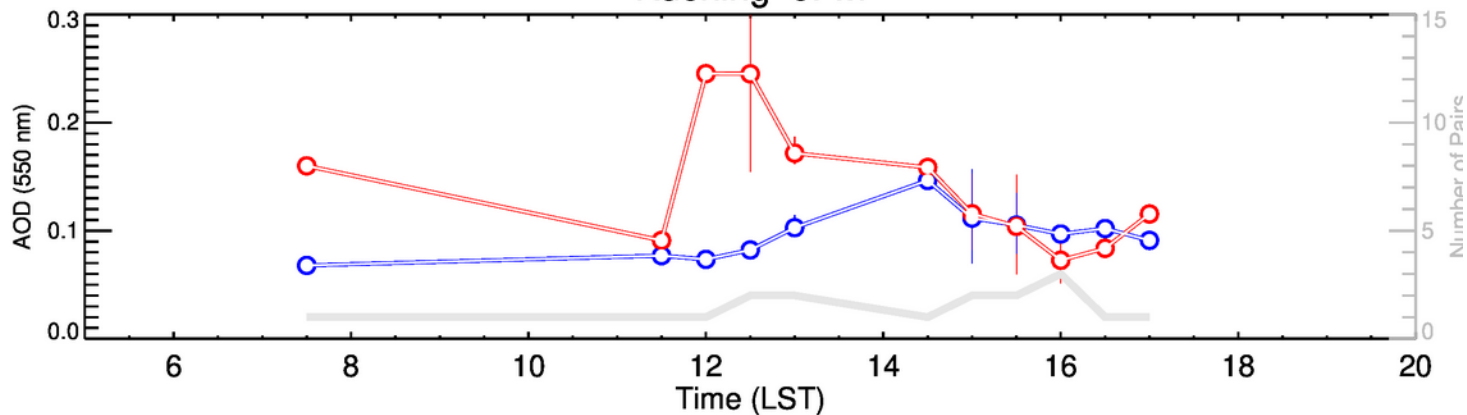

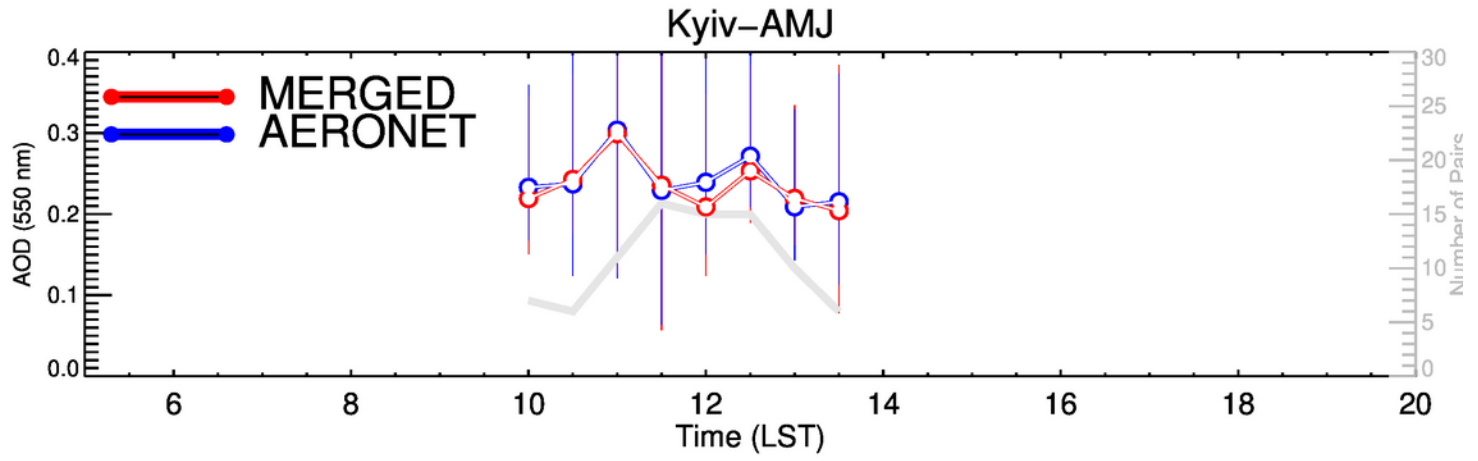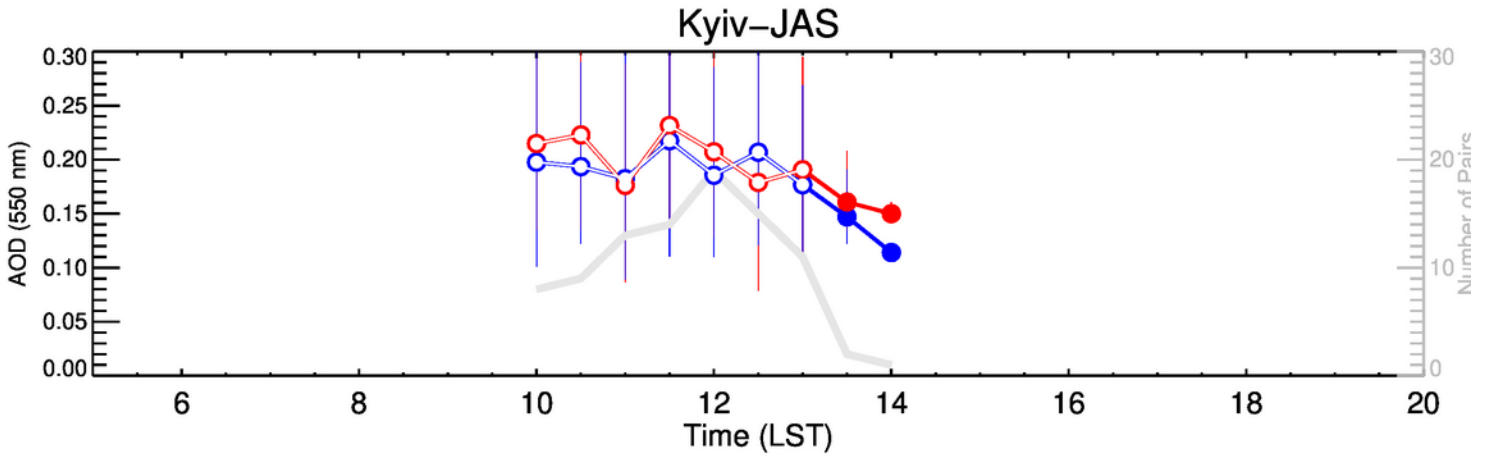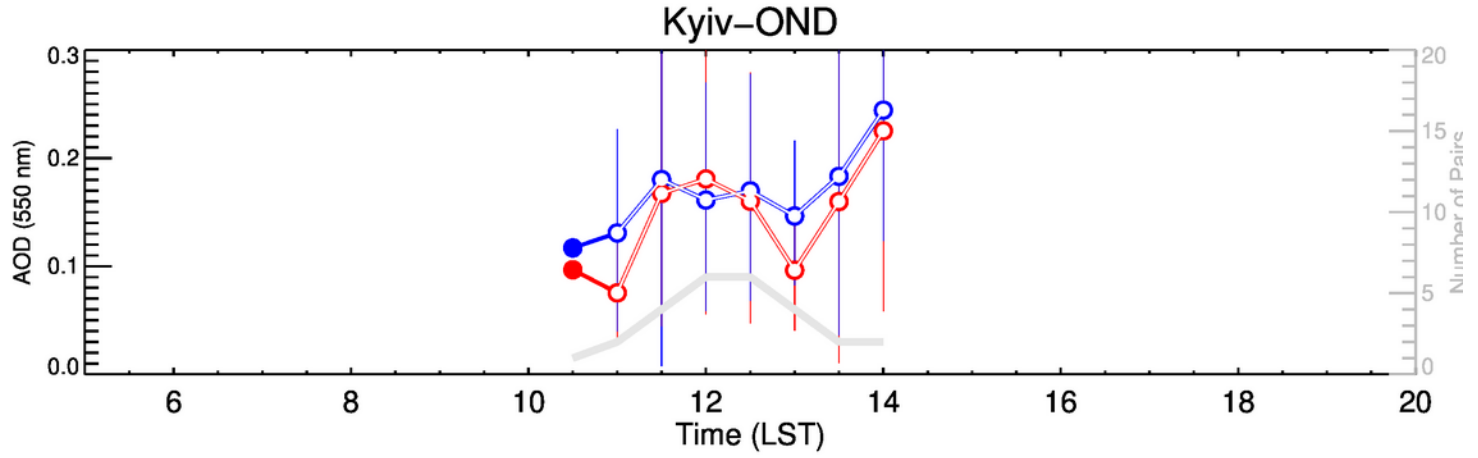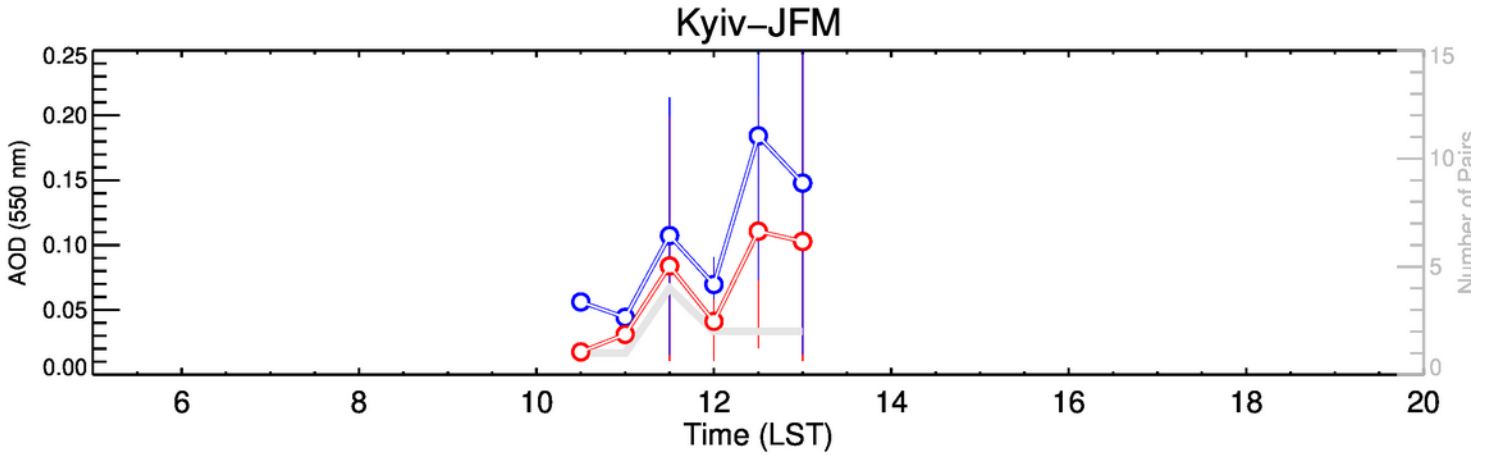

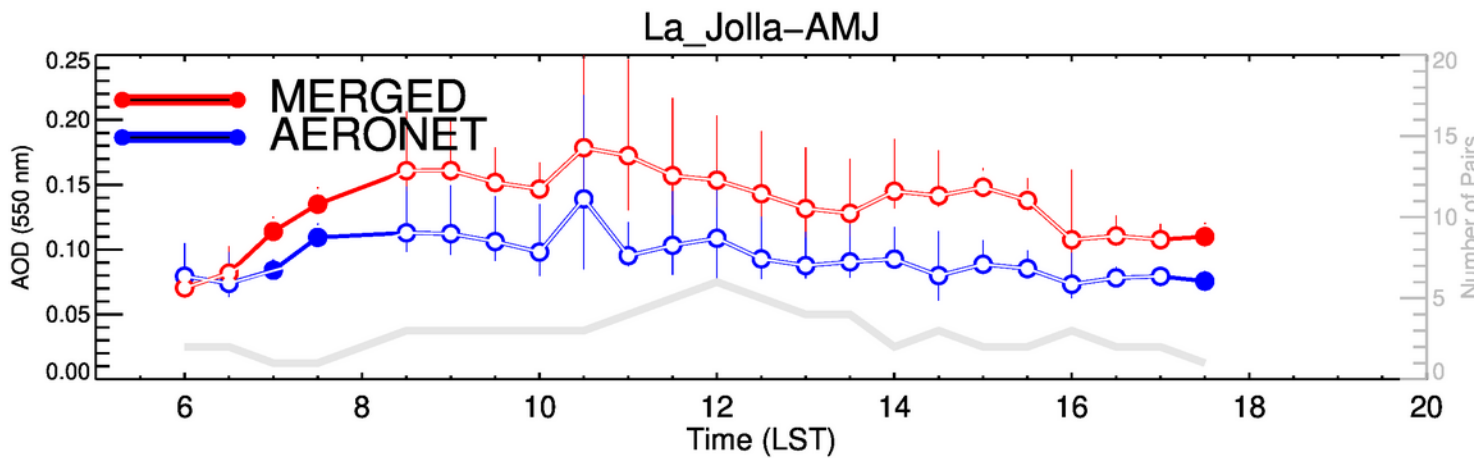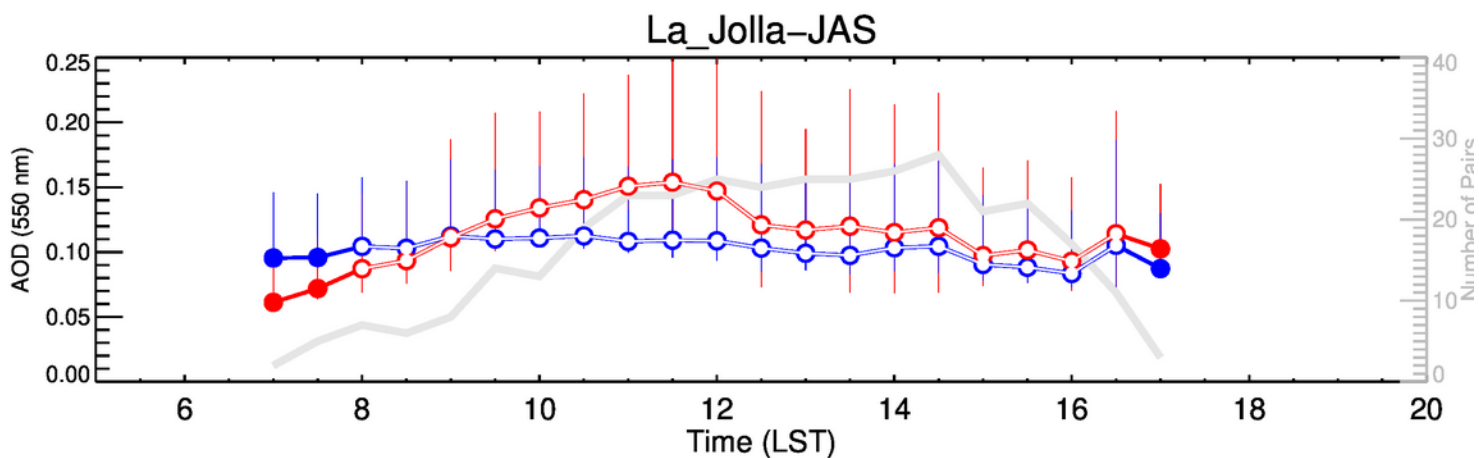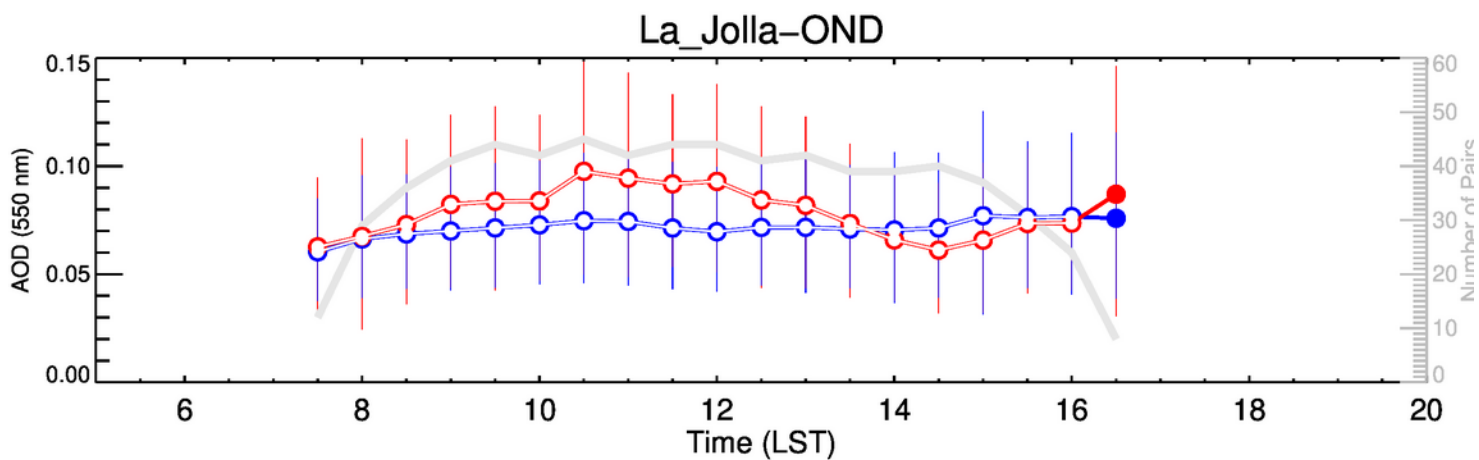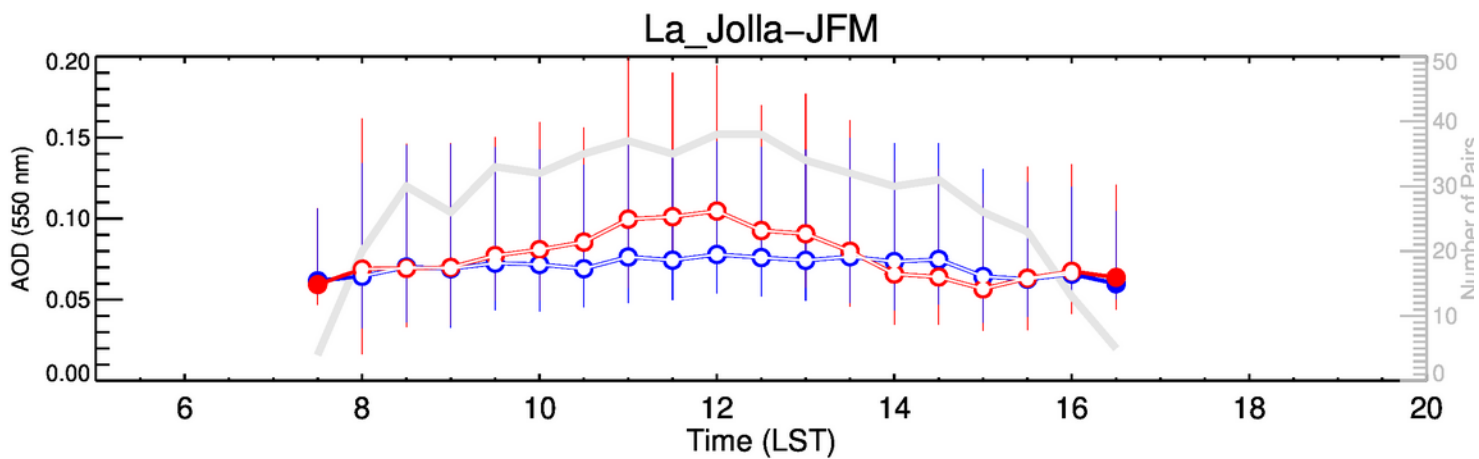



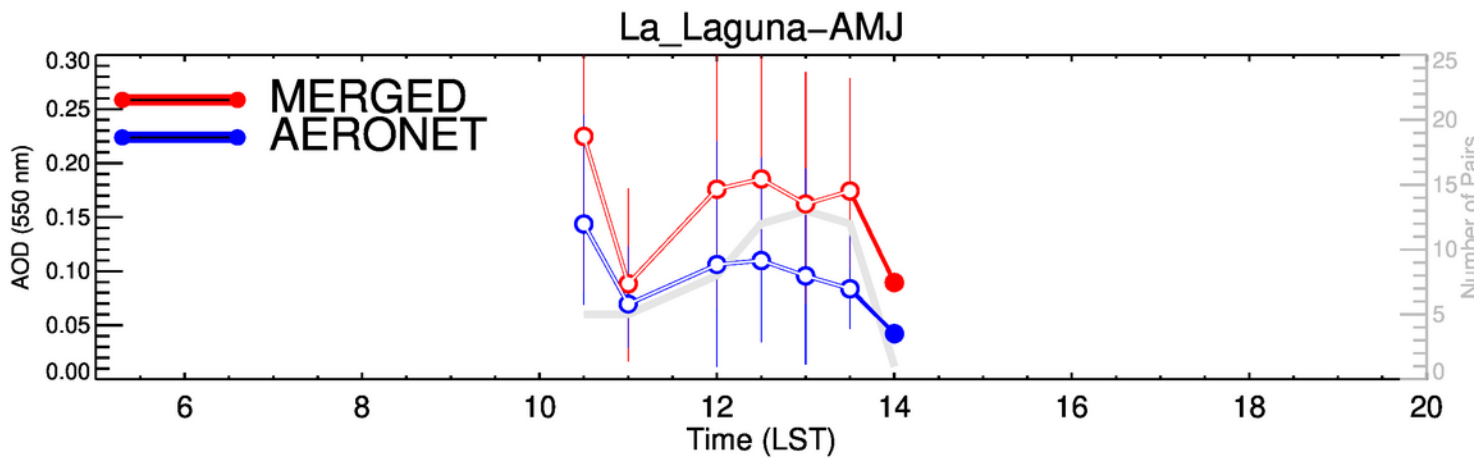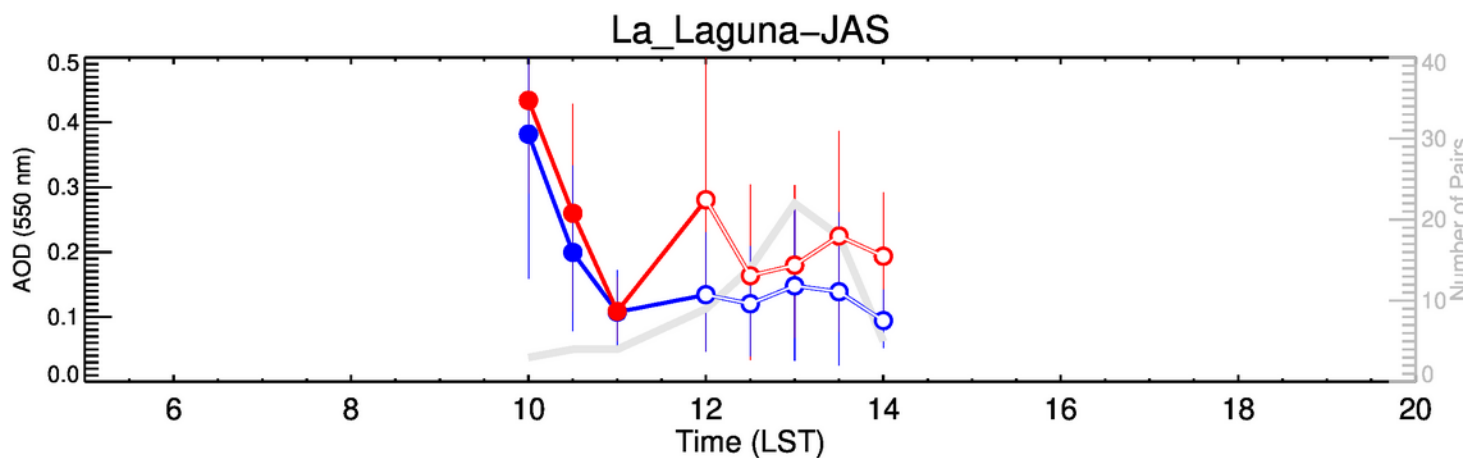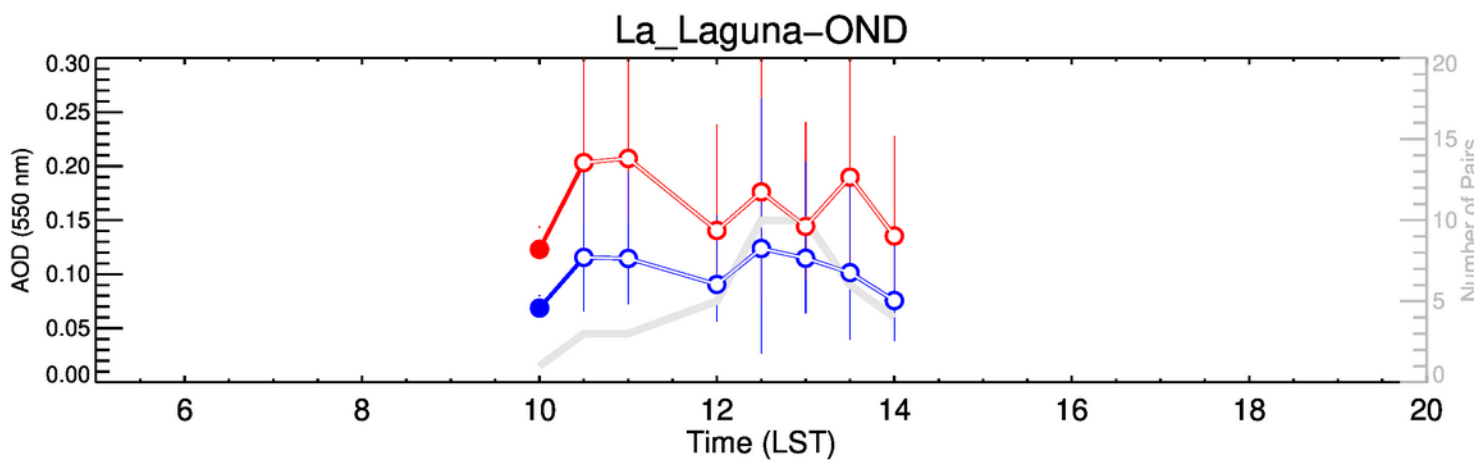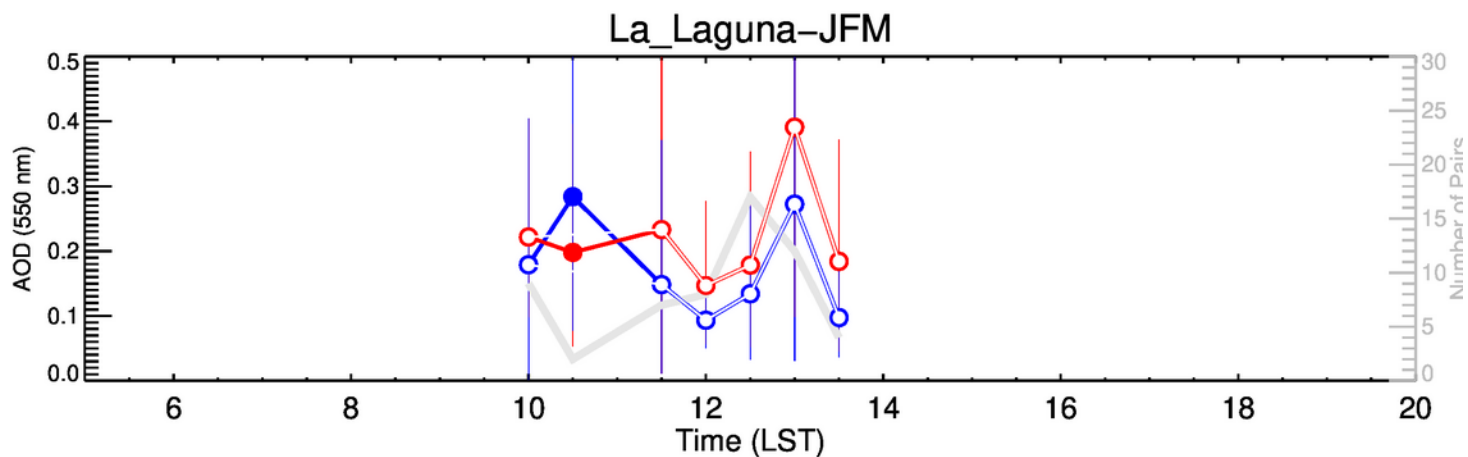

### La\_Parguera-AMJ

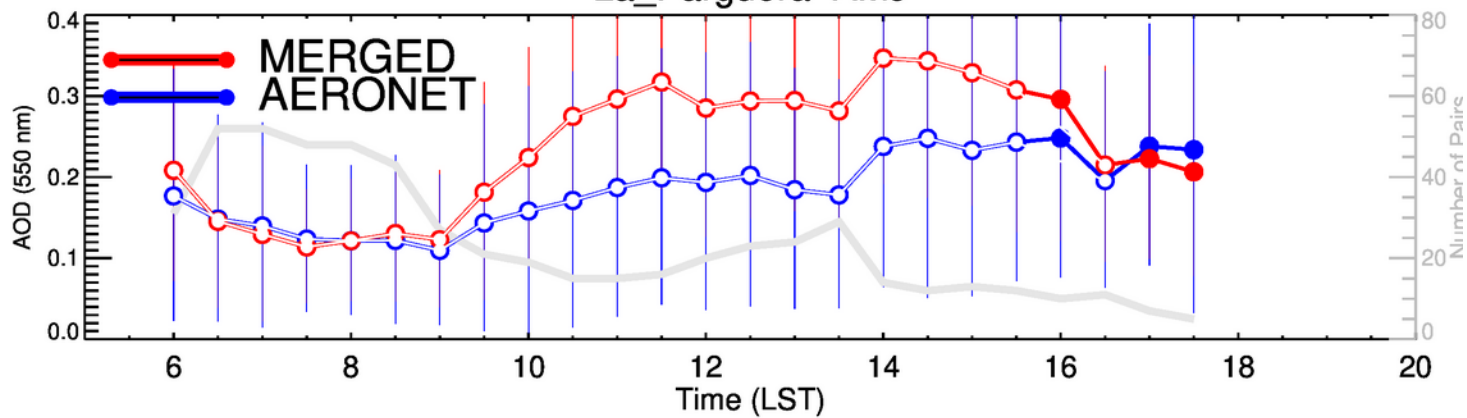

### La\_Parguera-JAS

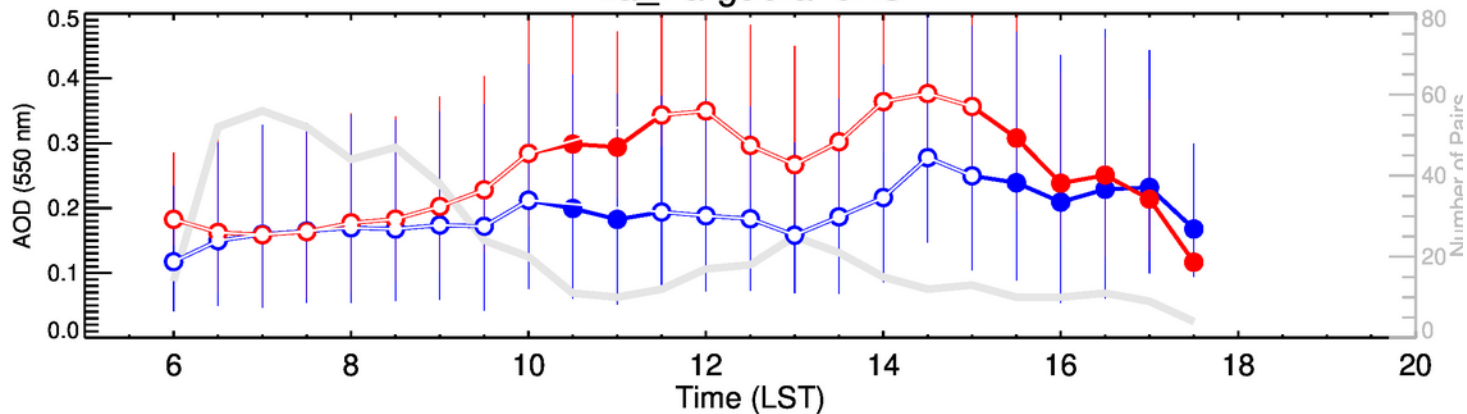

### La\_Parguera-OND

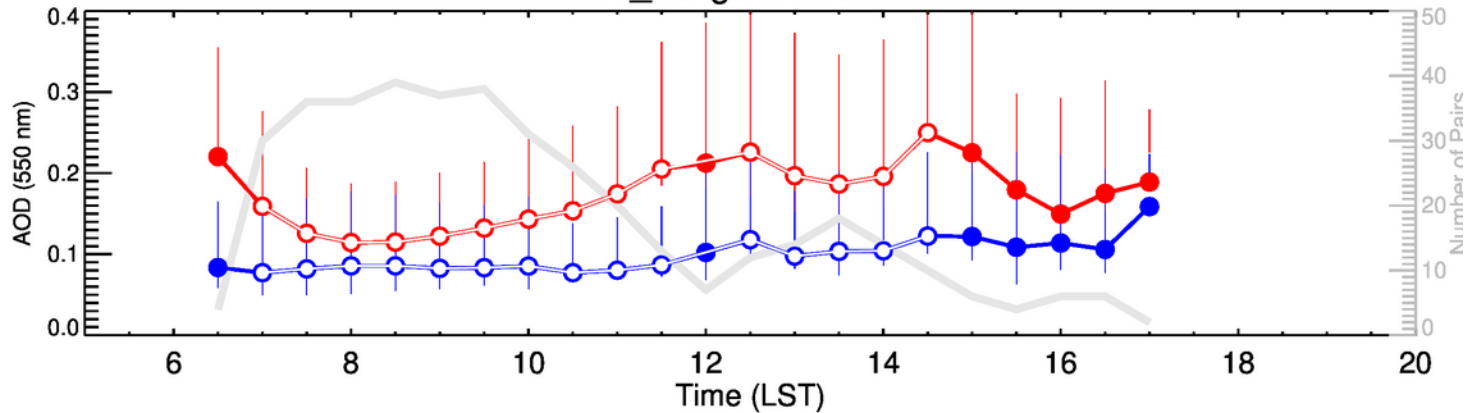

### La\_Parguera-JFM

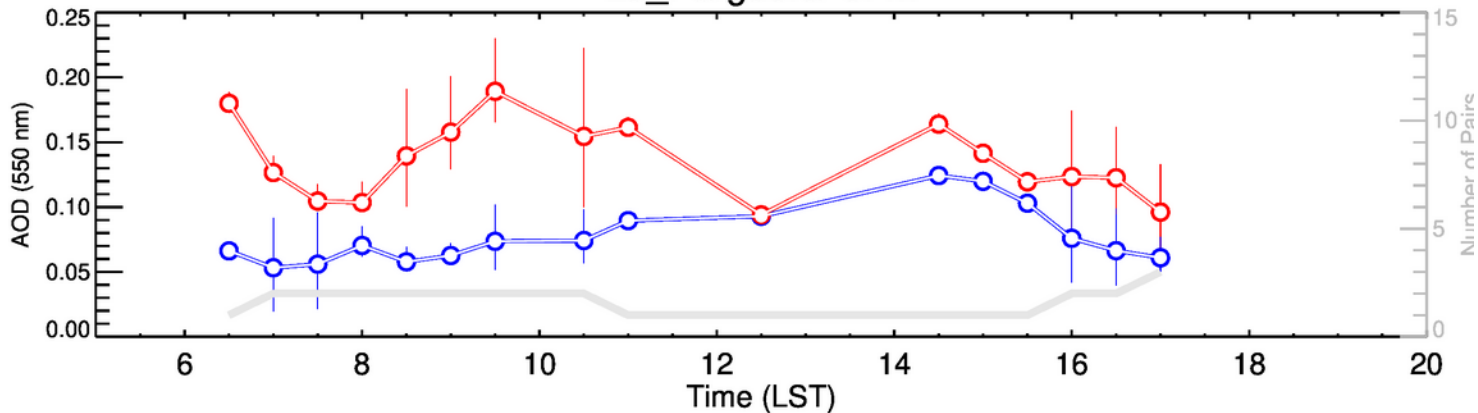

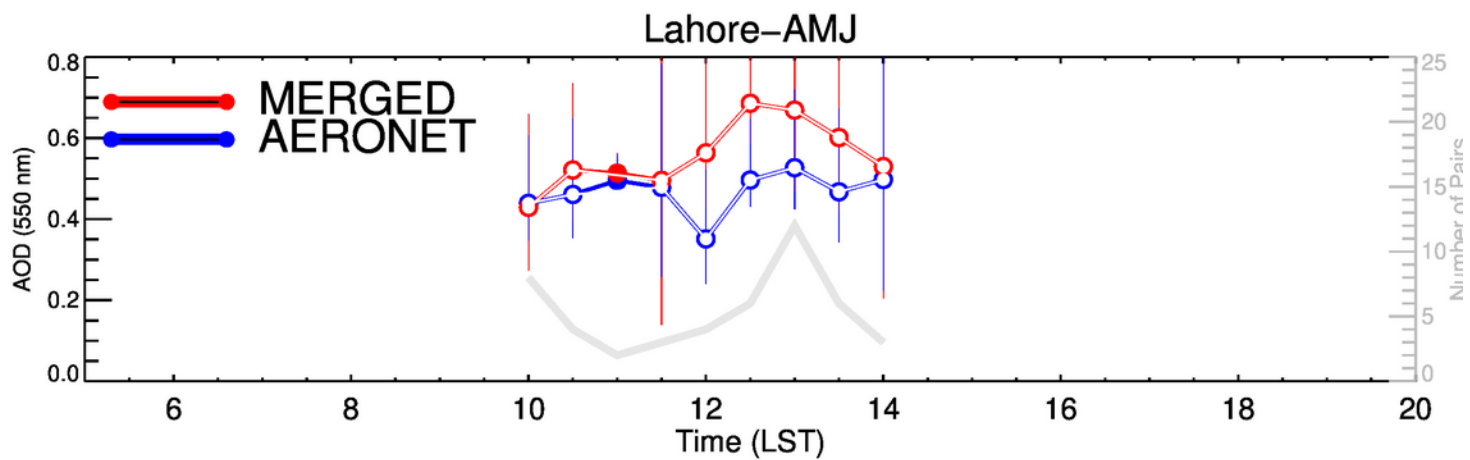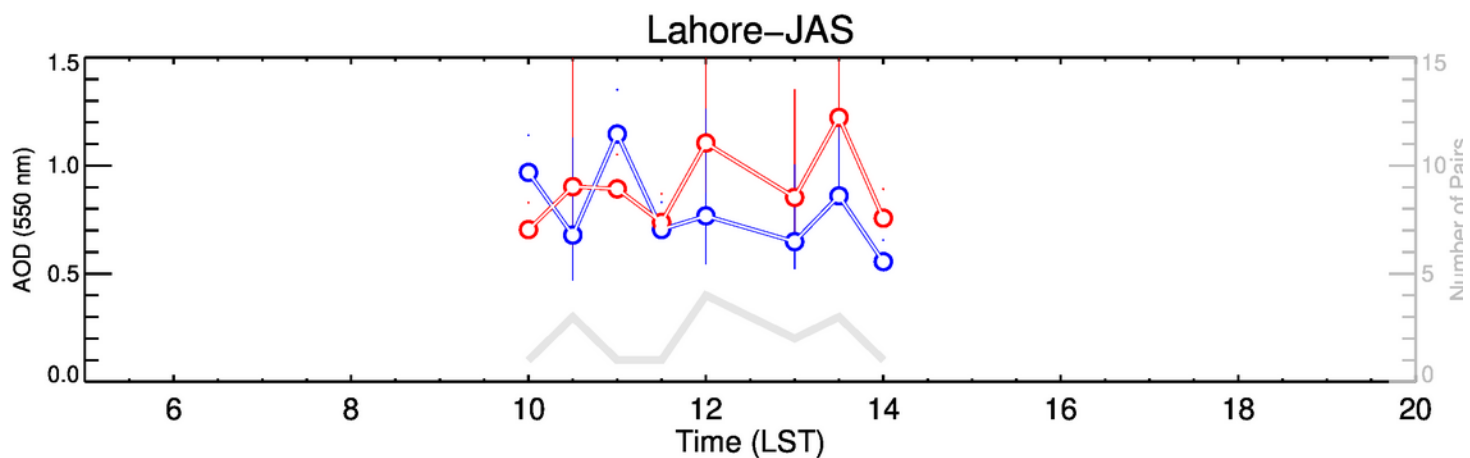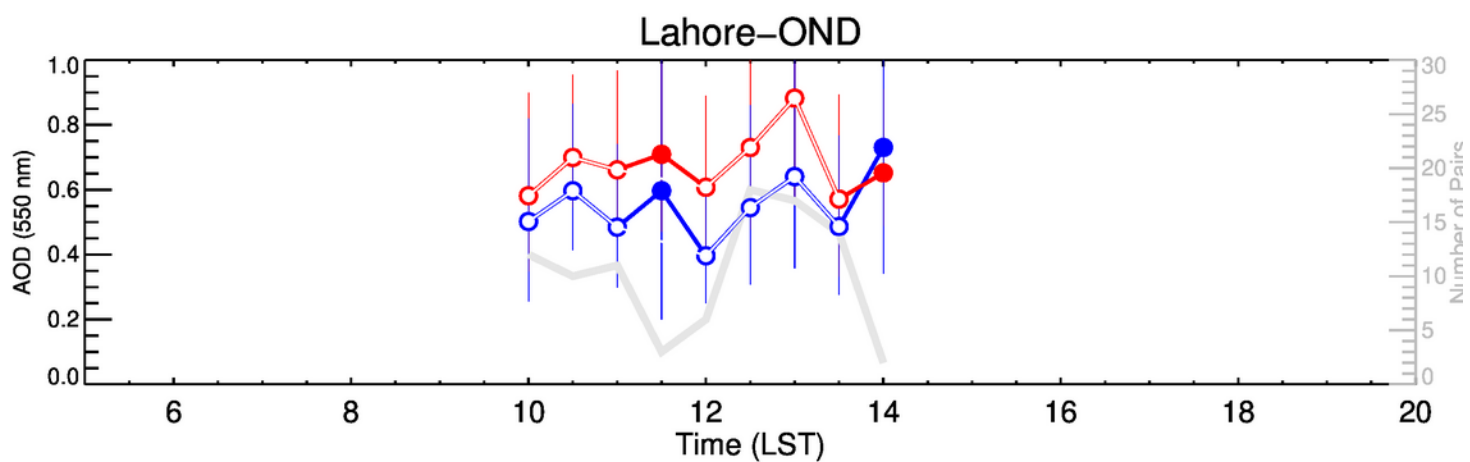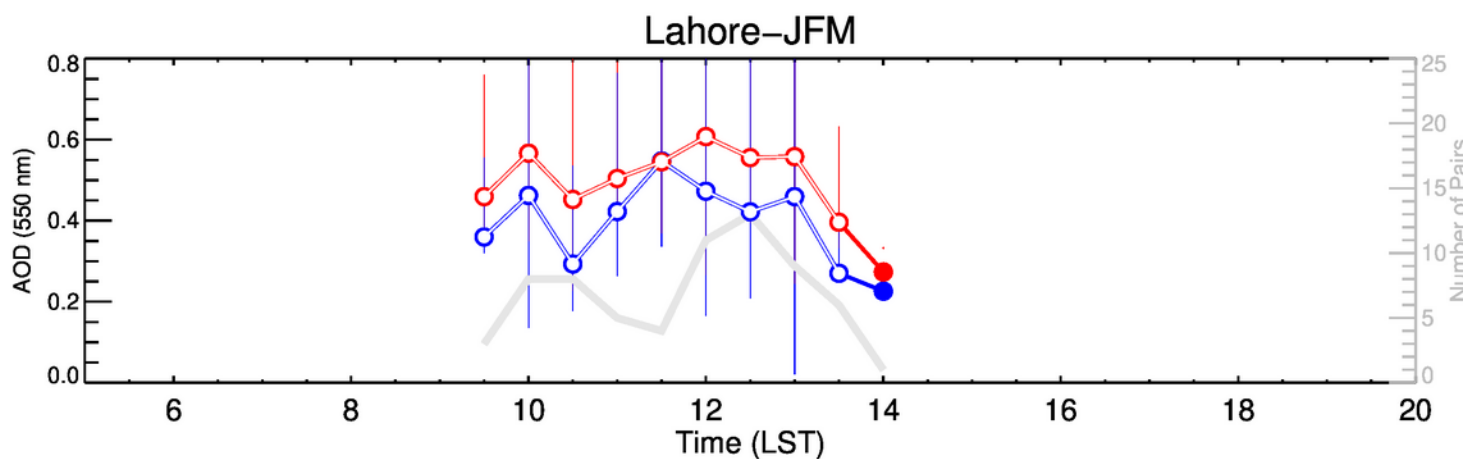

### Lake\_Argyle-AMJ

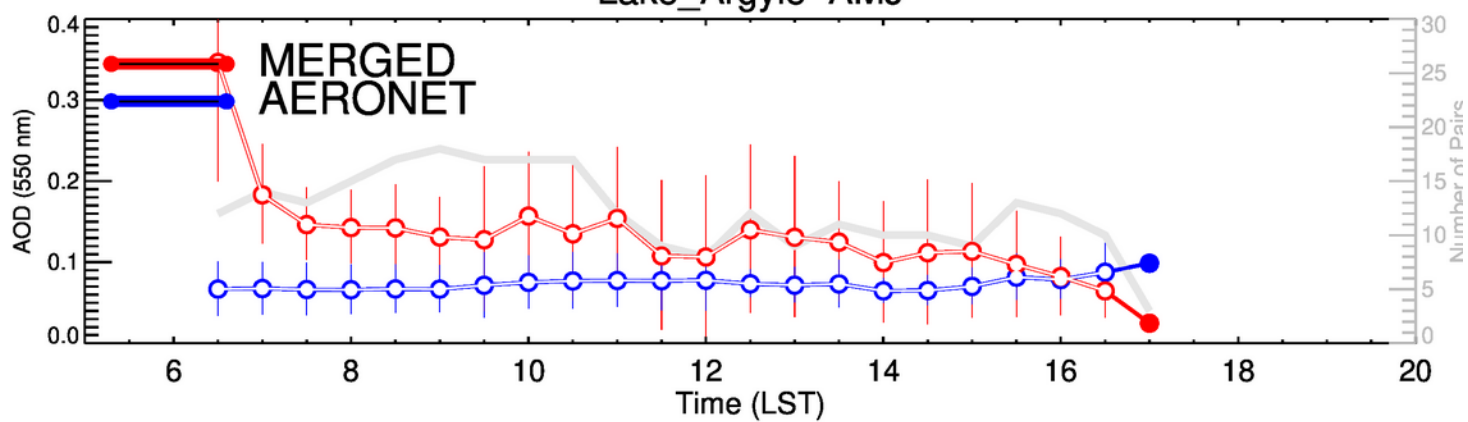

### Lake\_Argyle-JAS

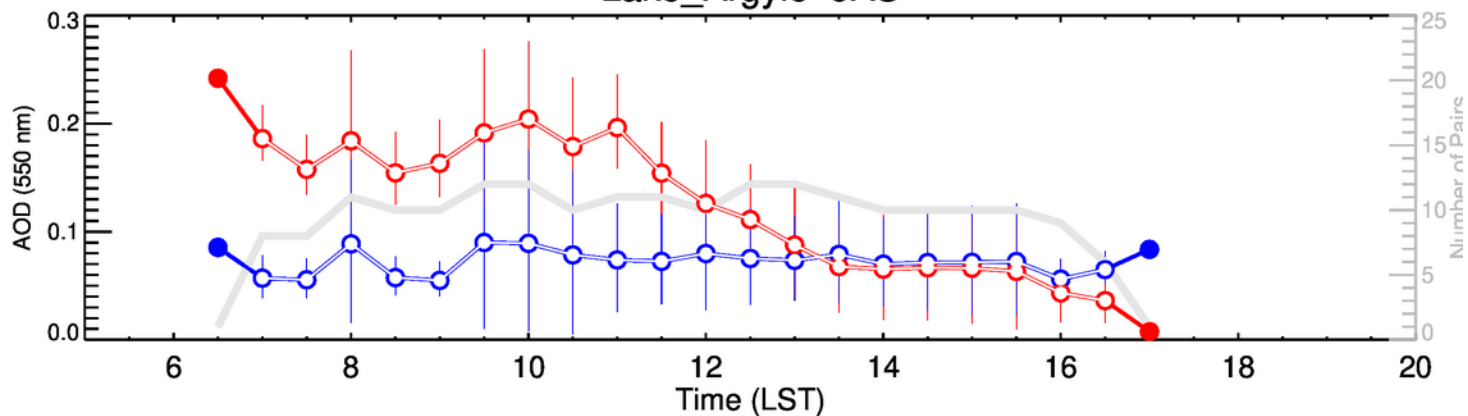

### Lake\_Argyle-OND

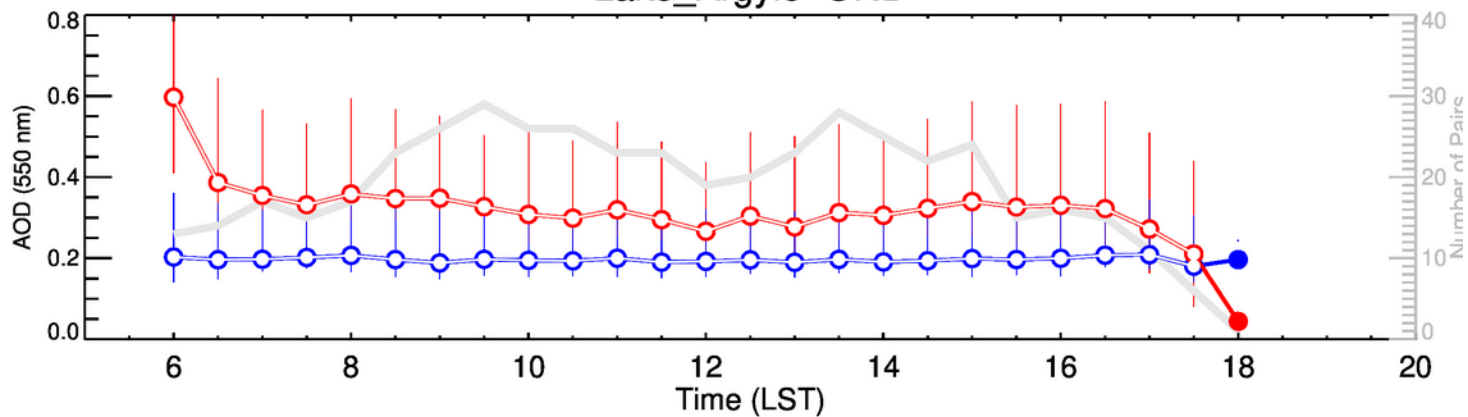

### Lake\_Argyle-JFM

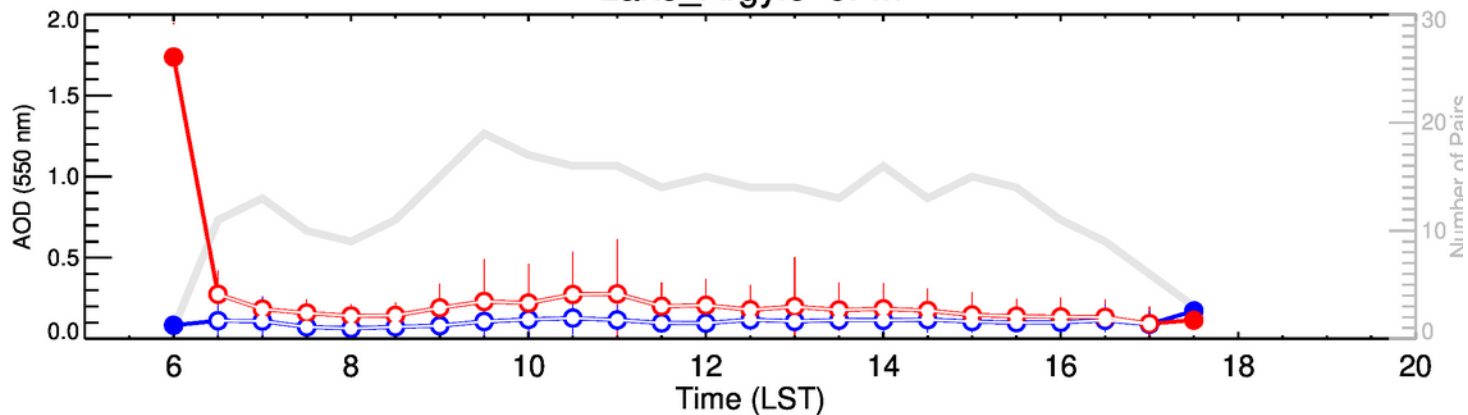

Lamezia\_Terme-AMJ

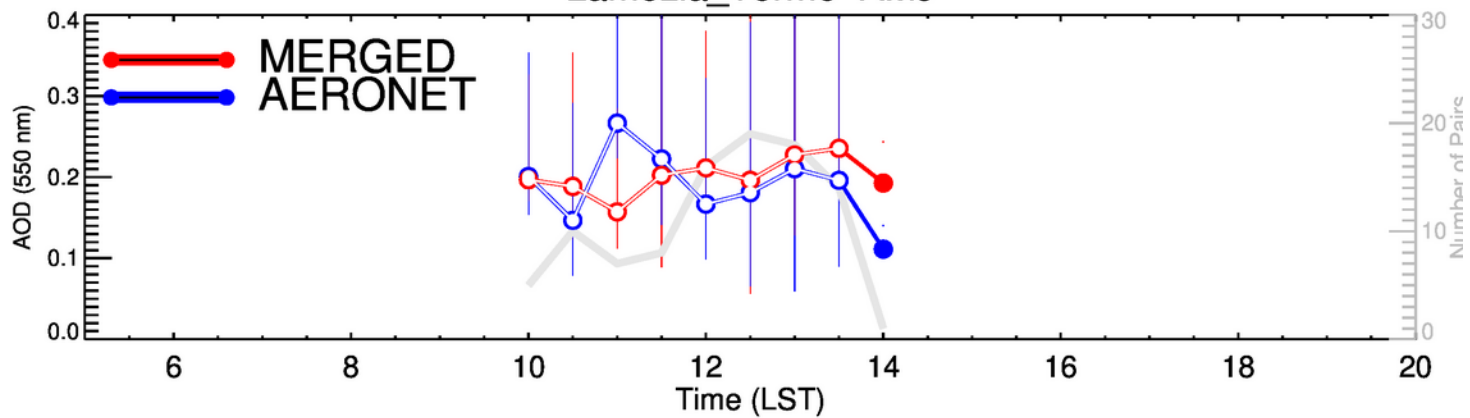

Lamezia\_Terme-JAS

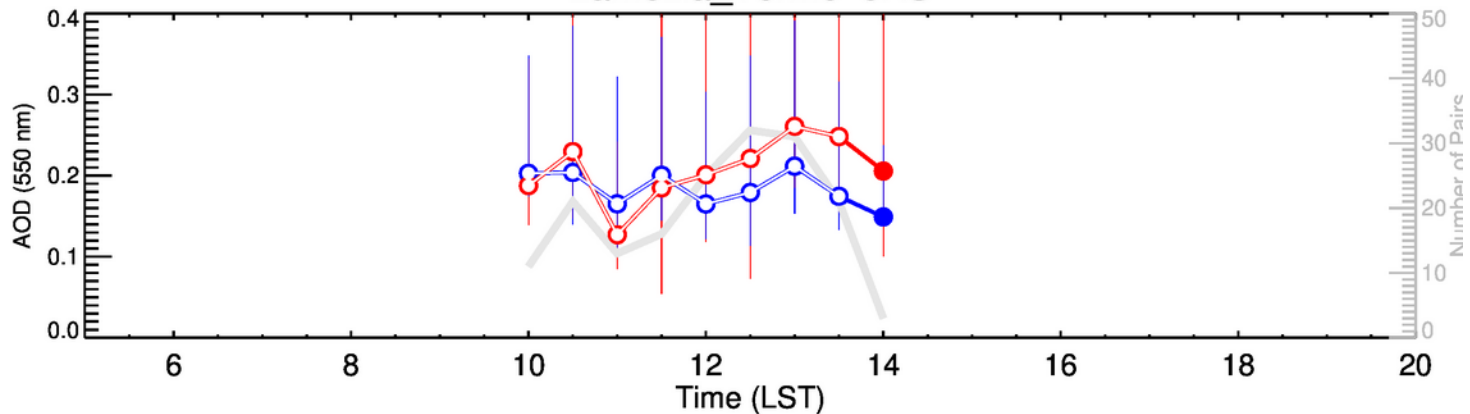

Lamezia\_Terme-OND

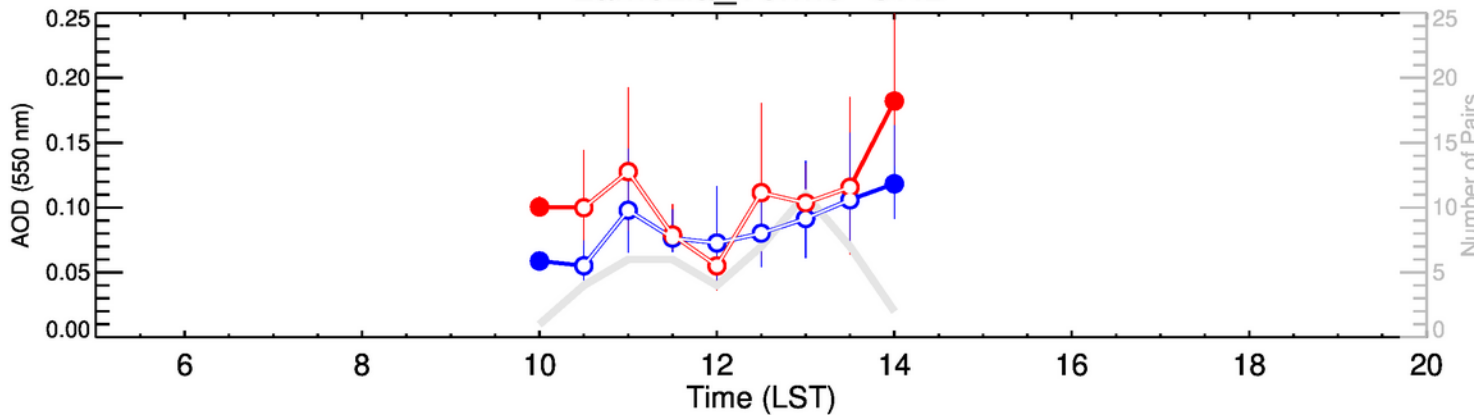

Lamezia\_Terme-JFM

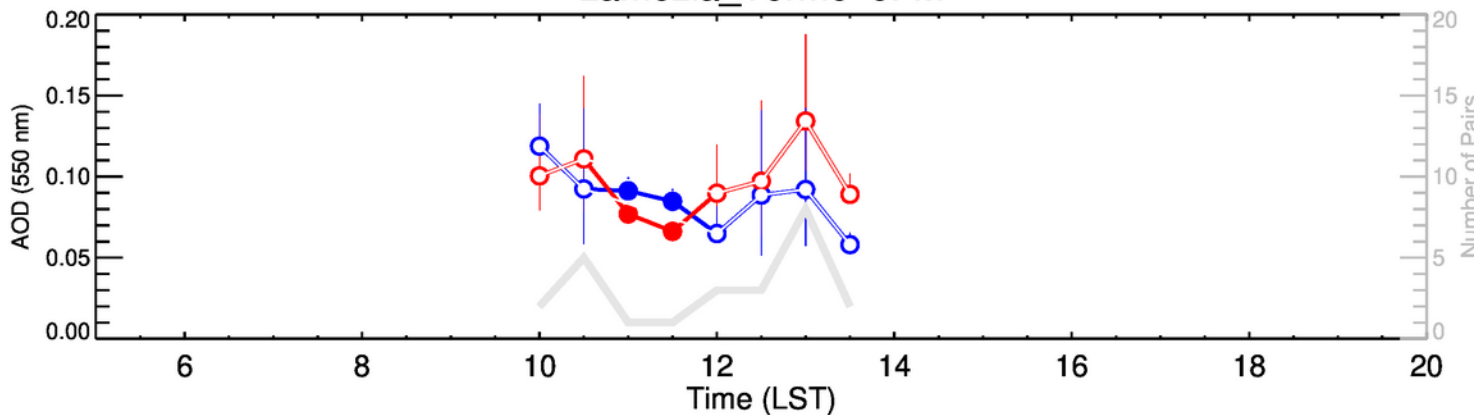

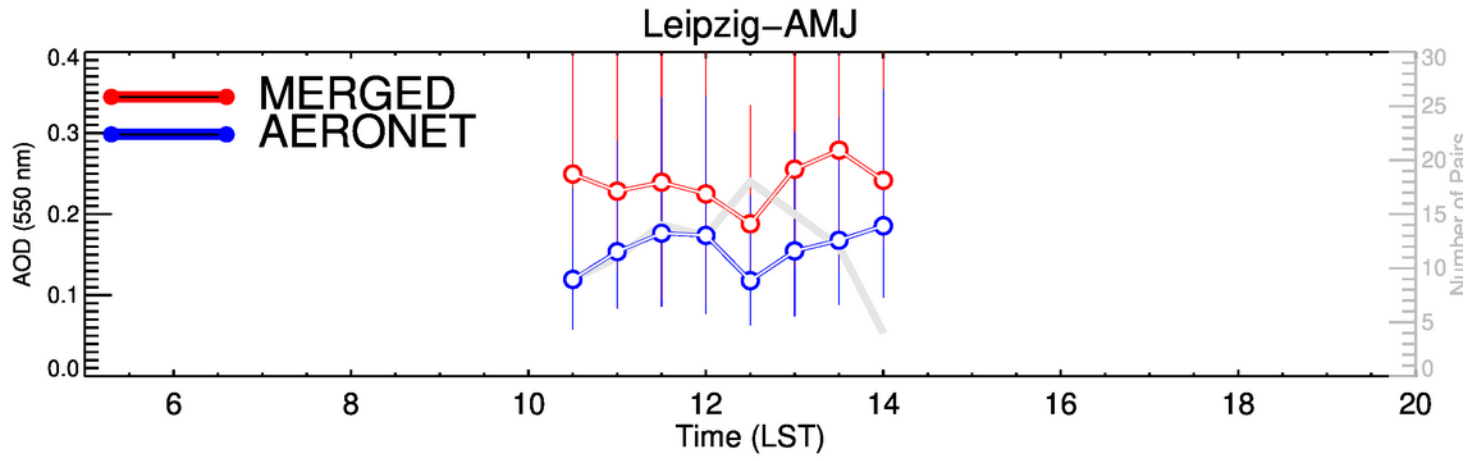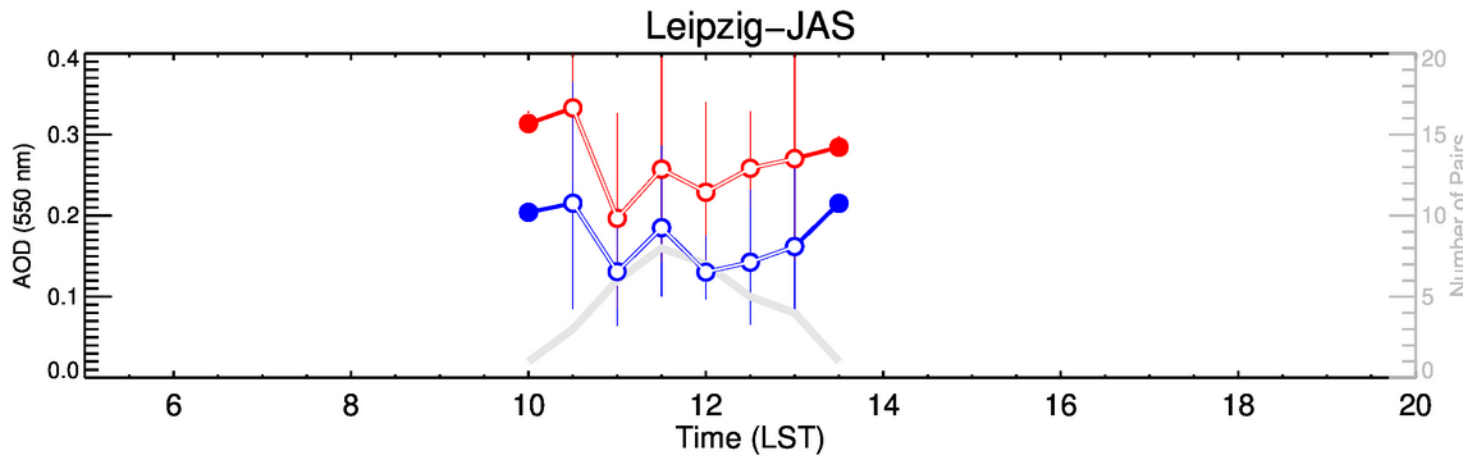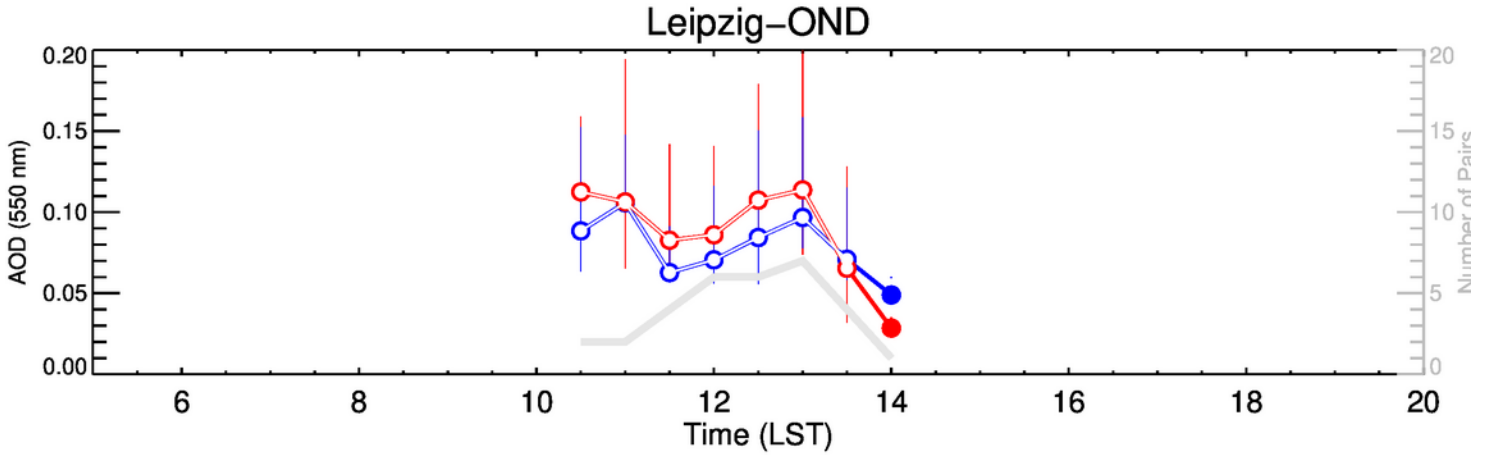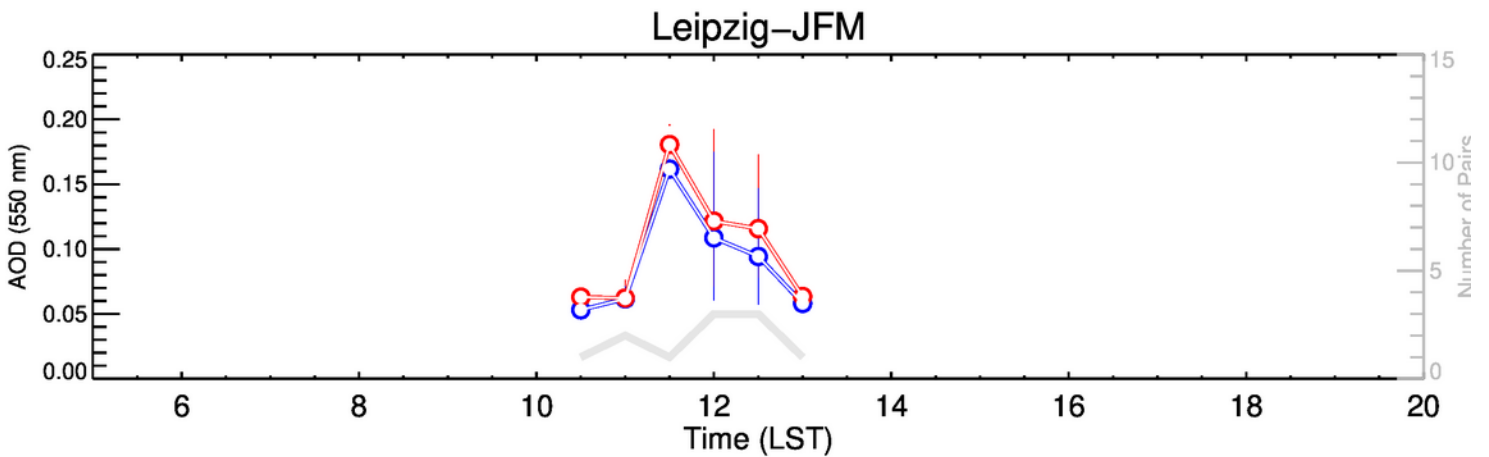

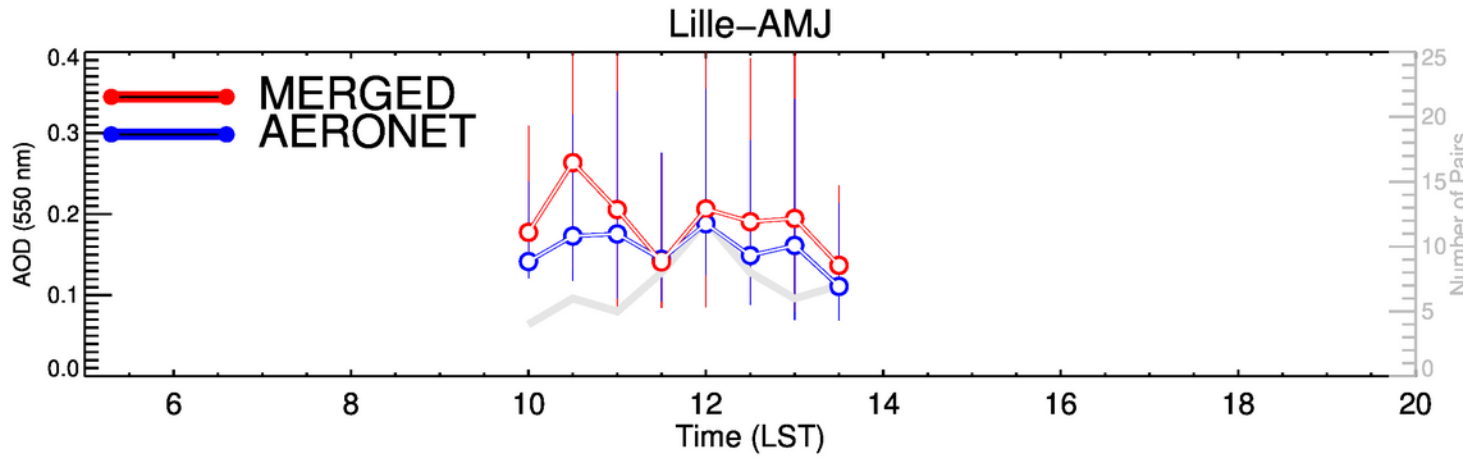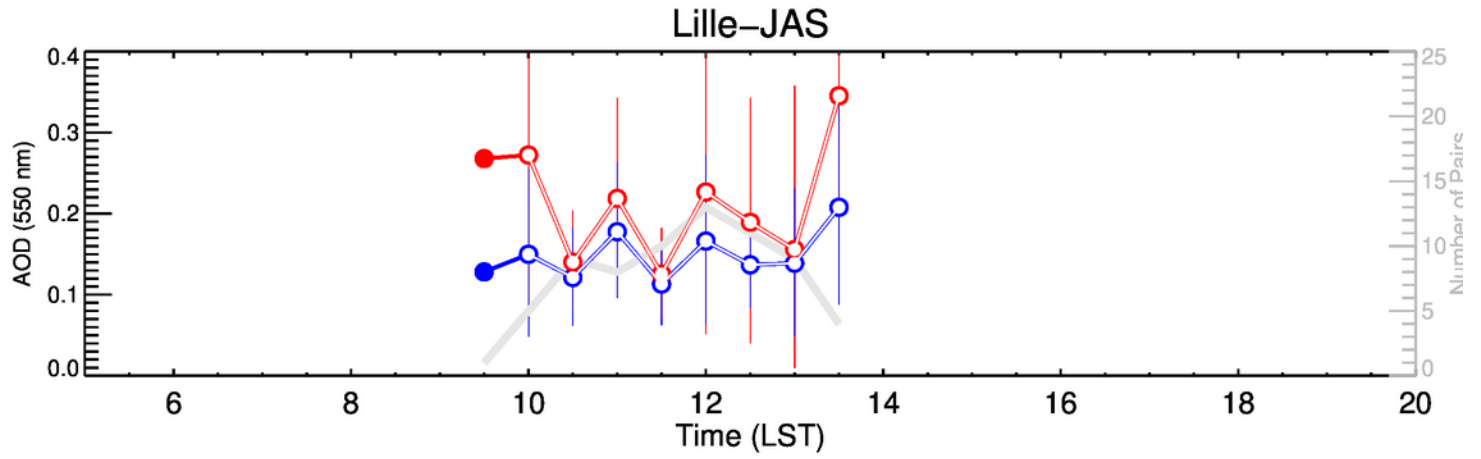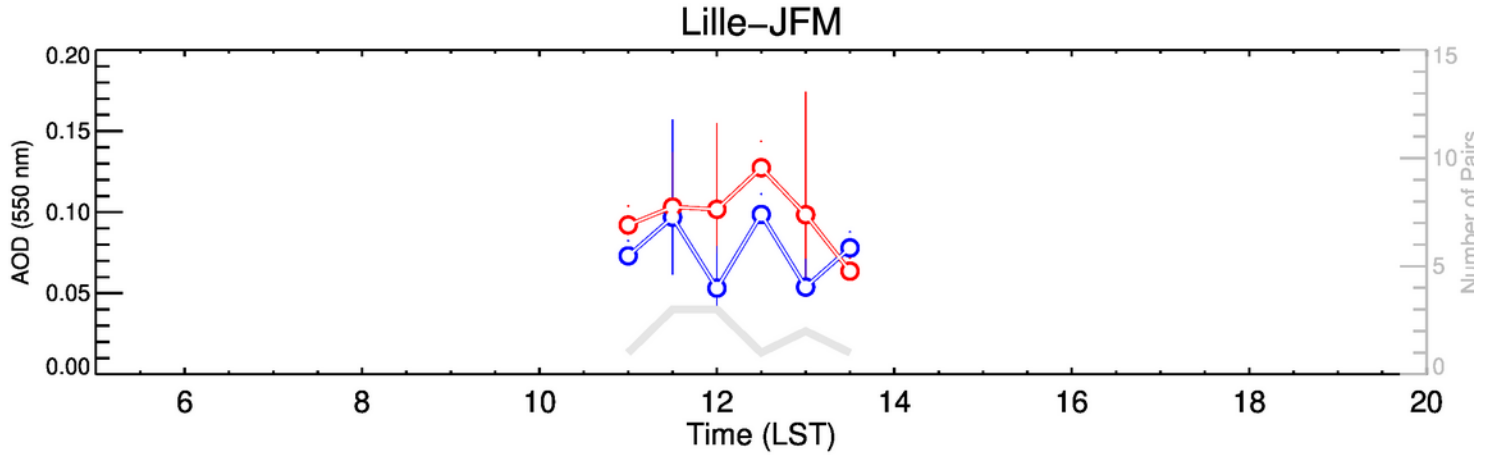

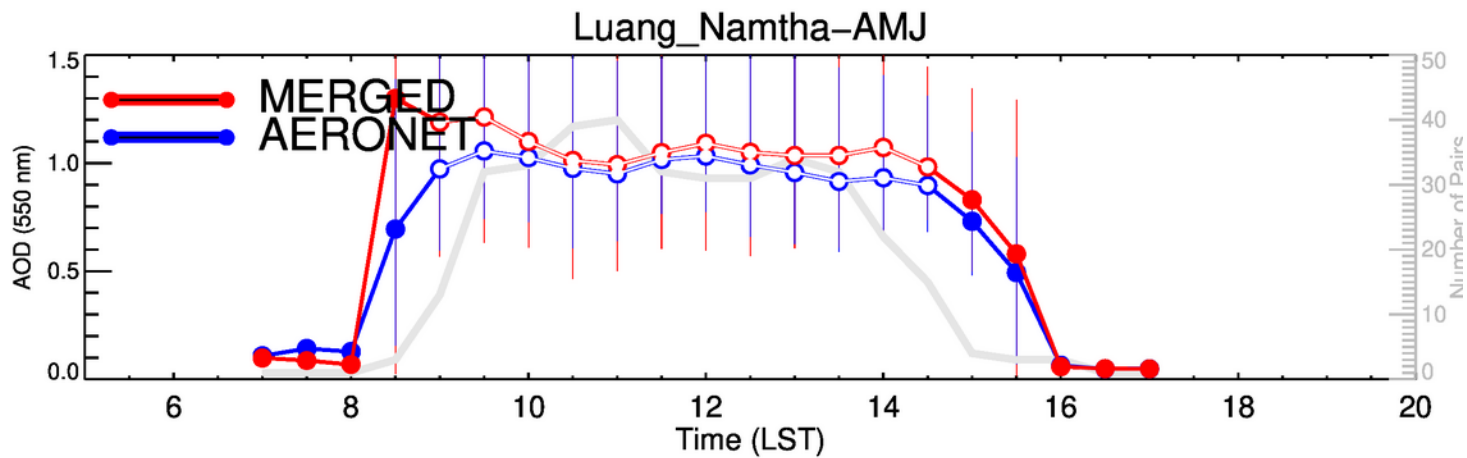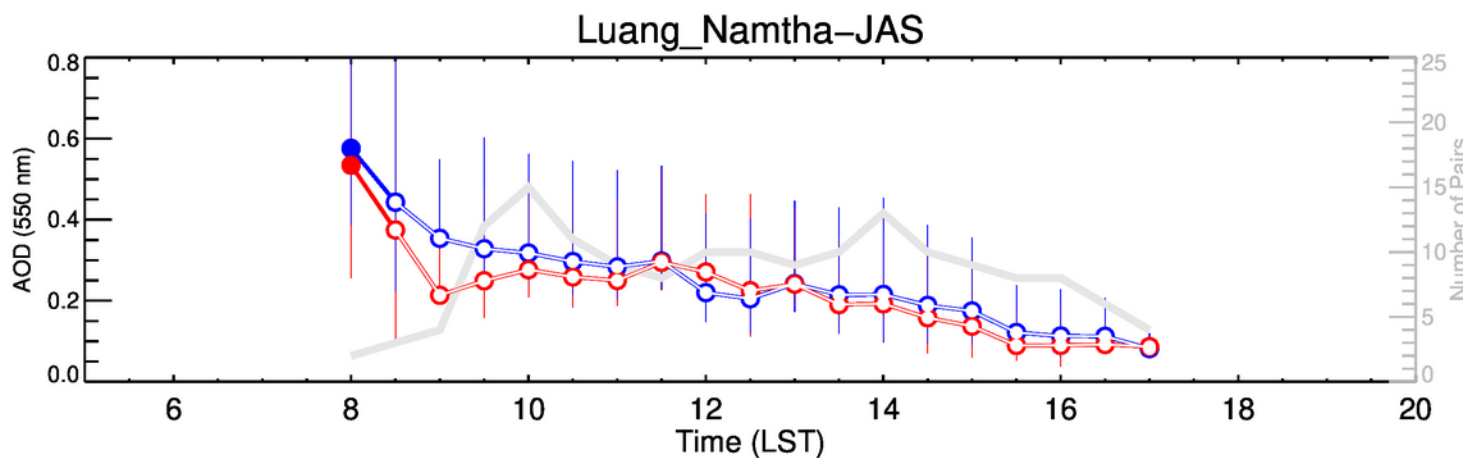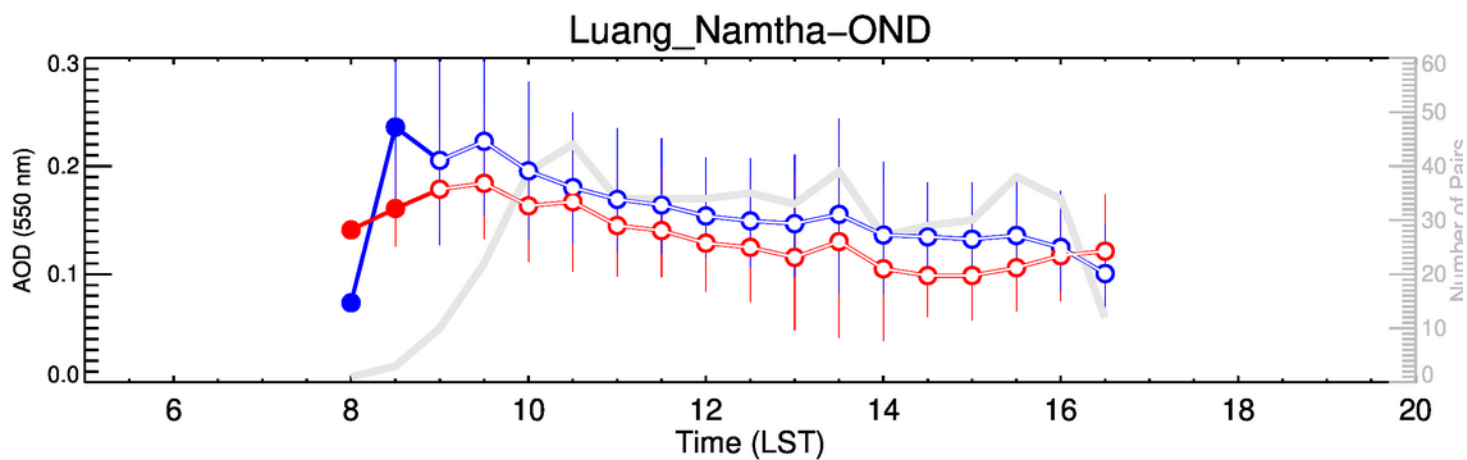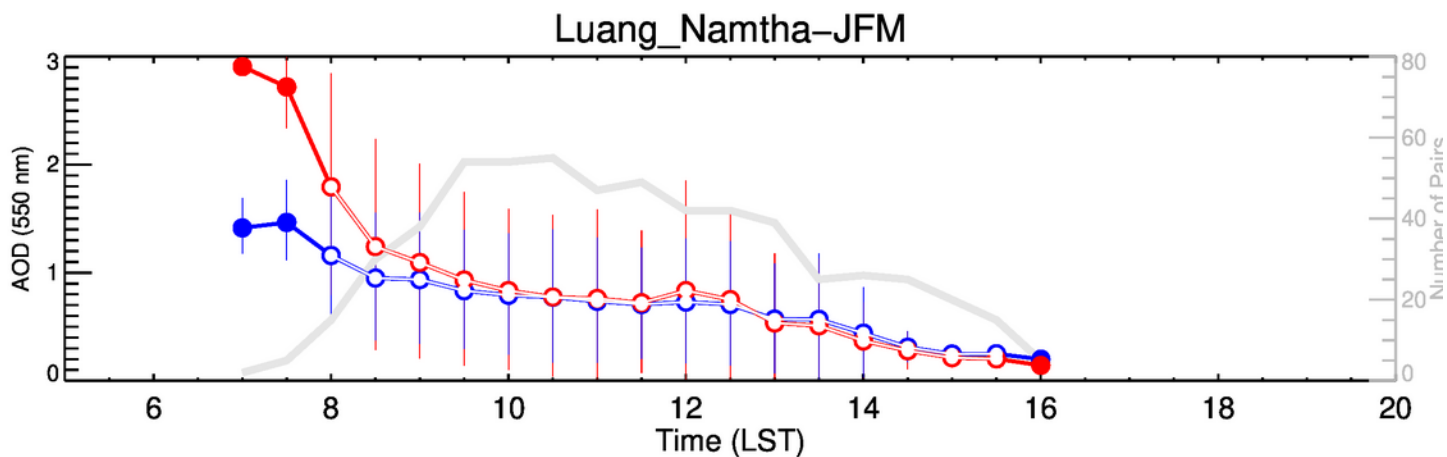



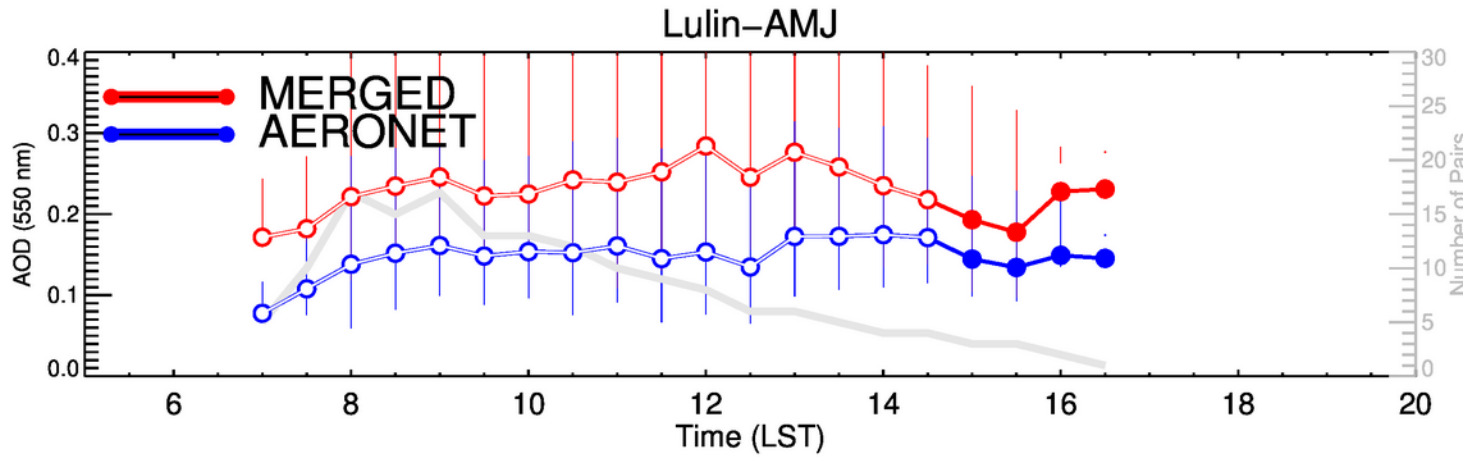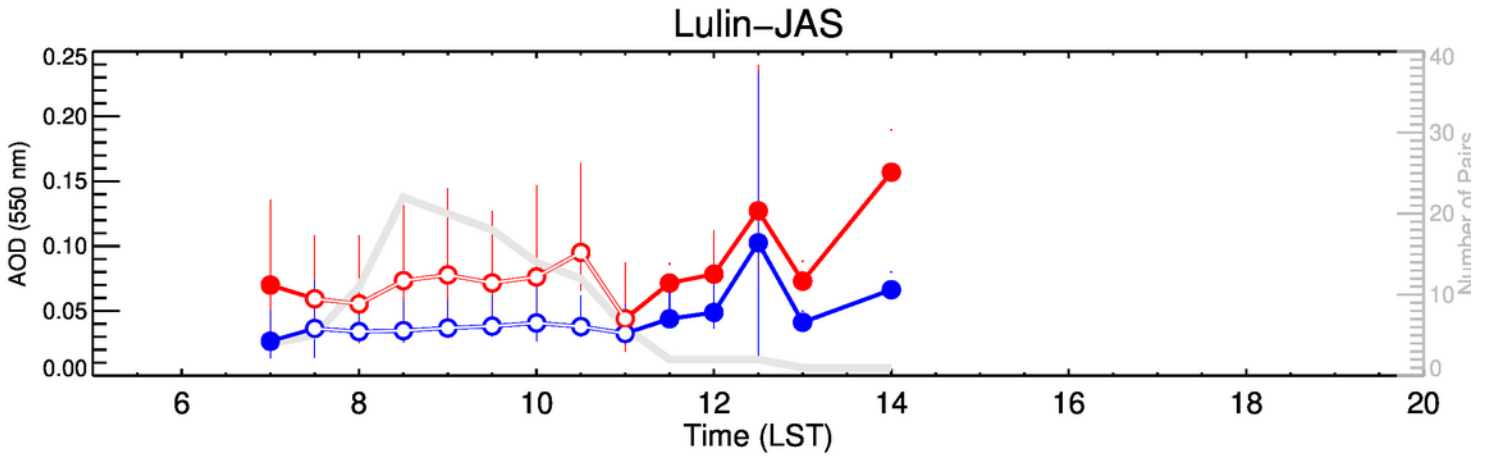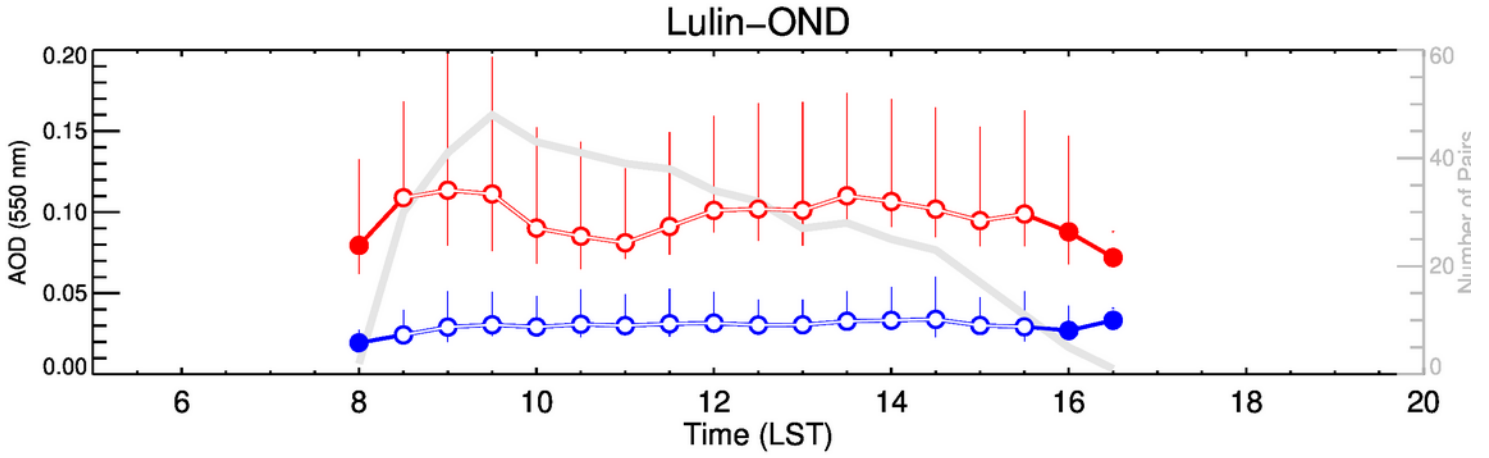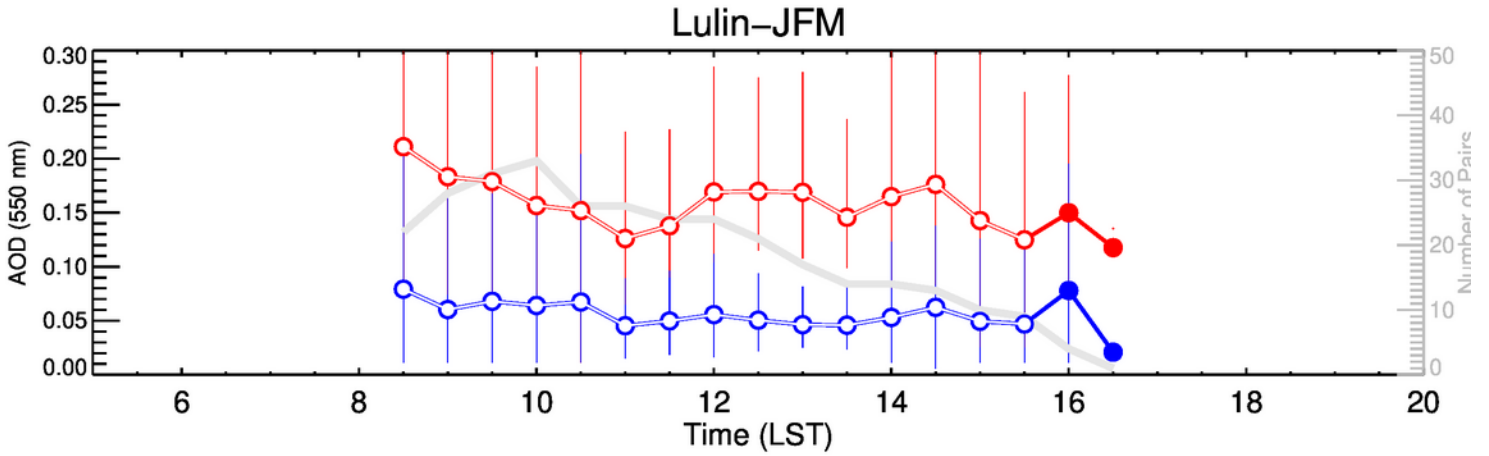

### Madrid-AMJ

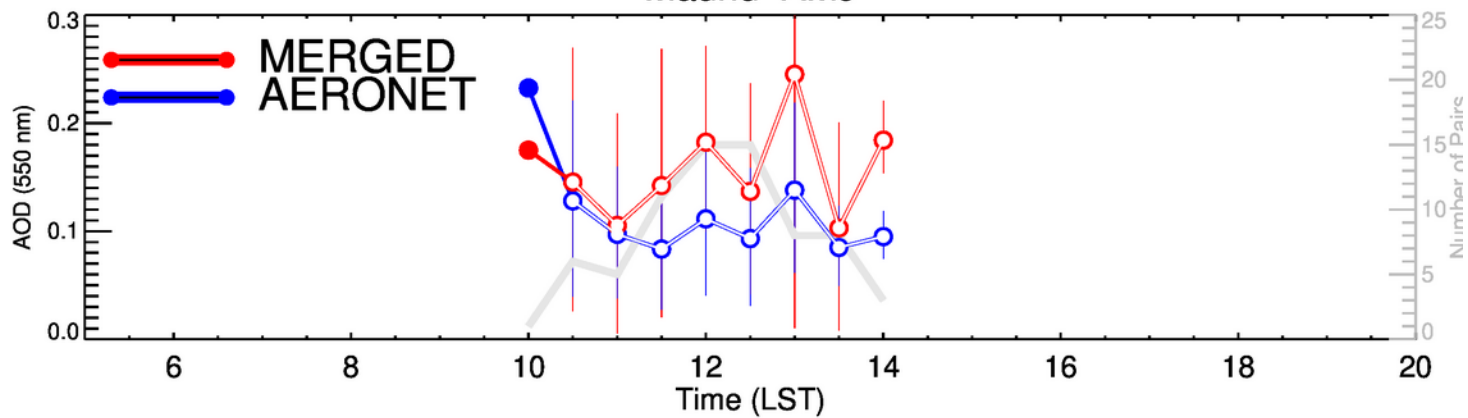

### Madrid-JAS

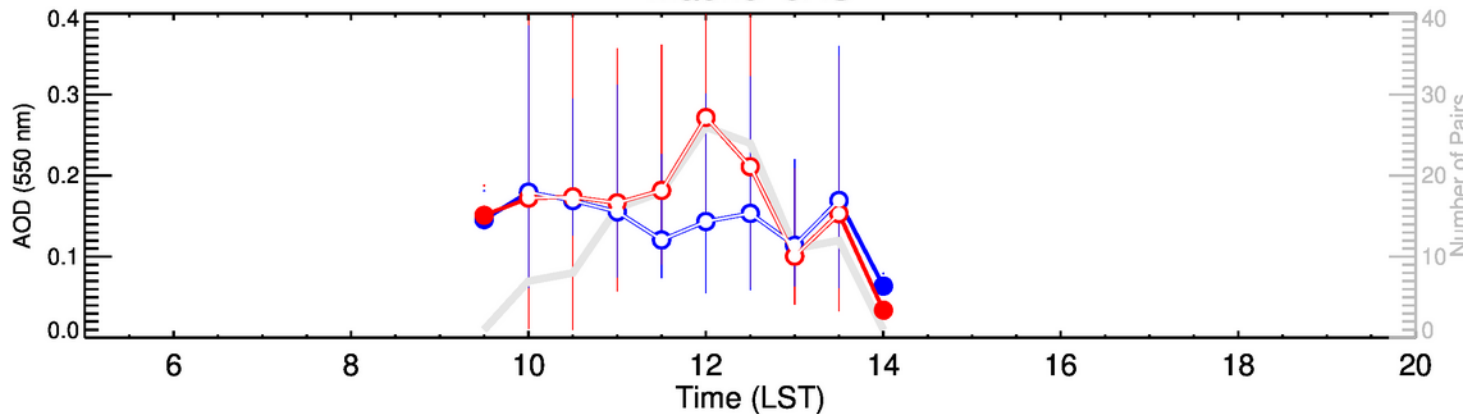

### Madrid-OND

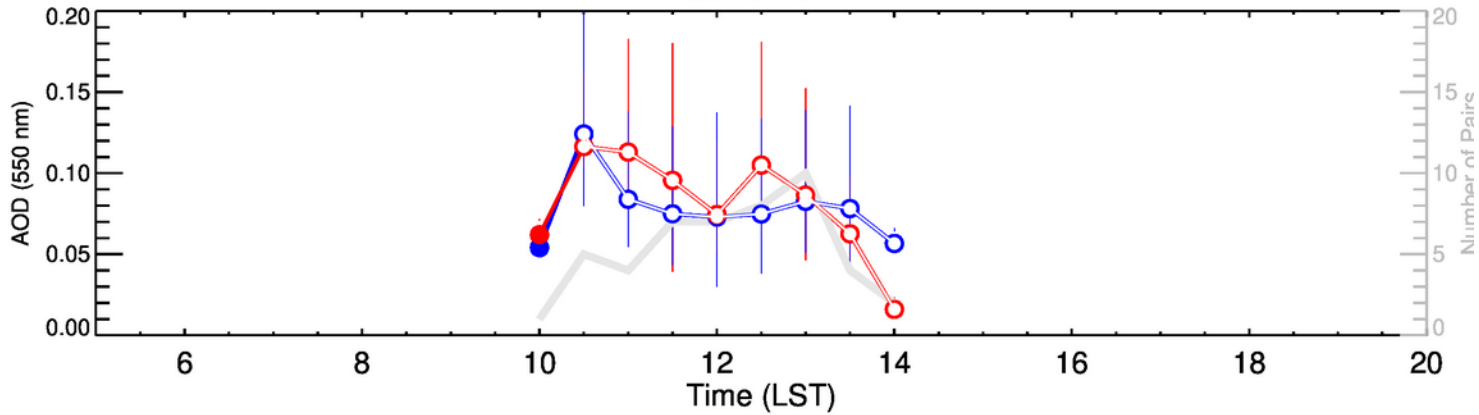

### Madrid-JFM

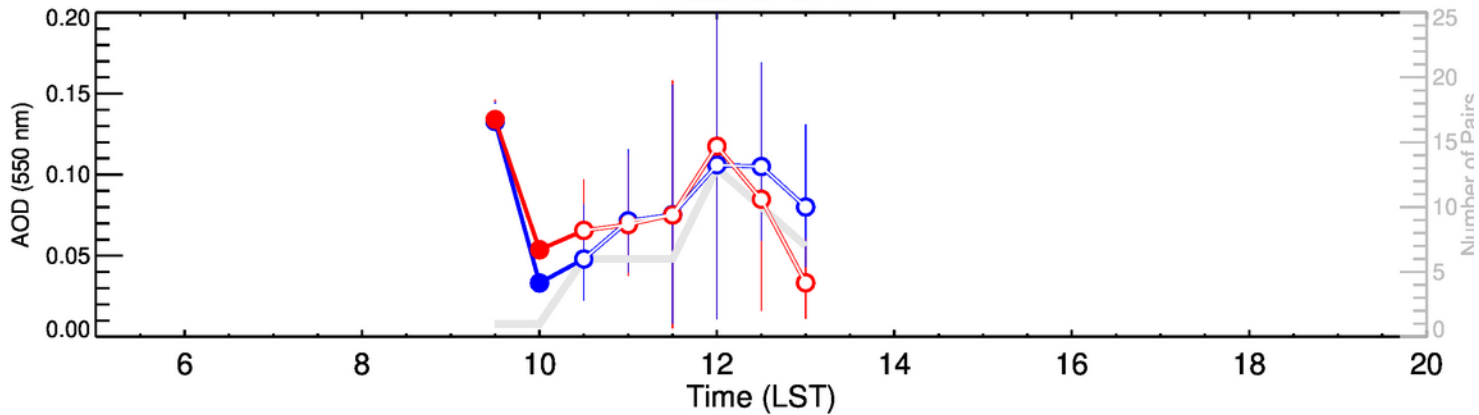

### Magurele\_Inoe-JAS

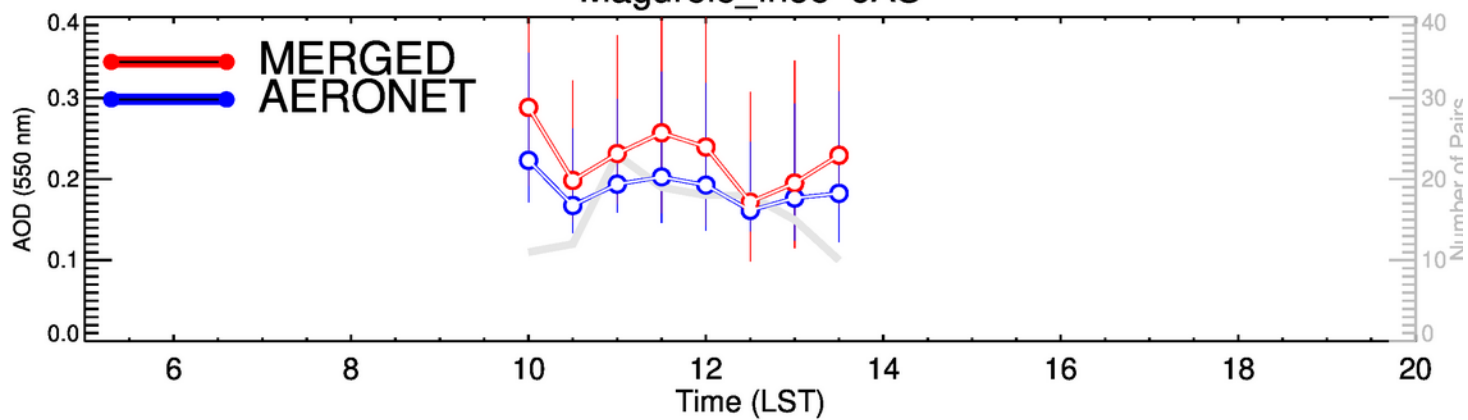

### Magurele\_Inoe-OND

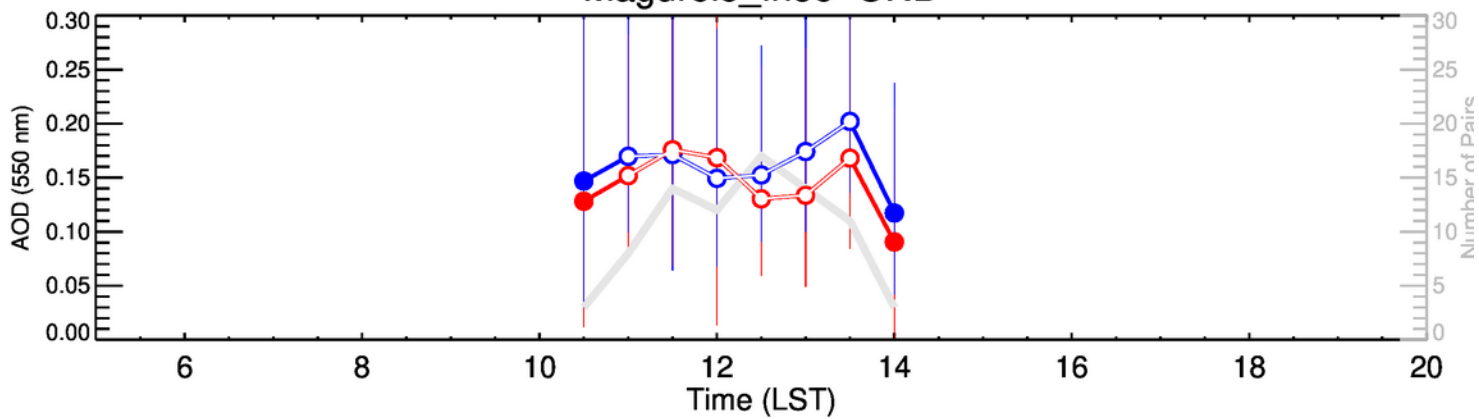

### Magurele\_Inoe-JFM

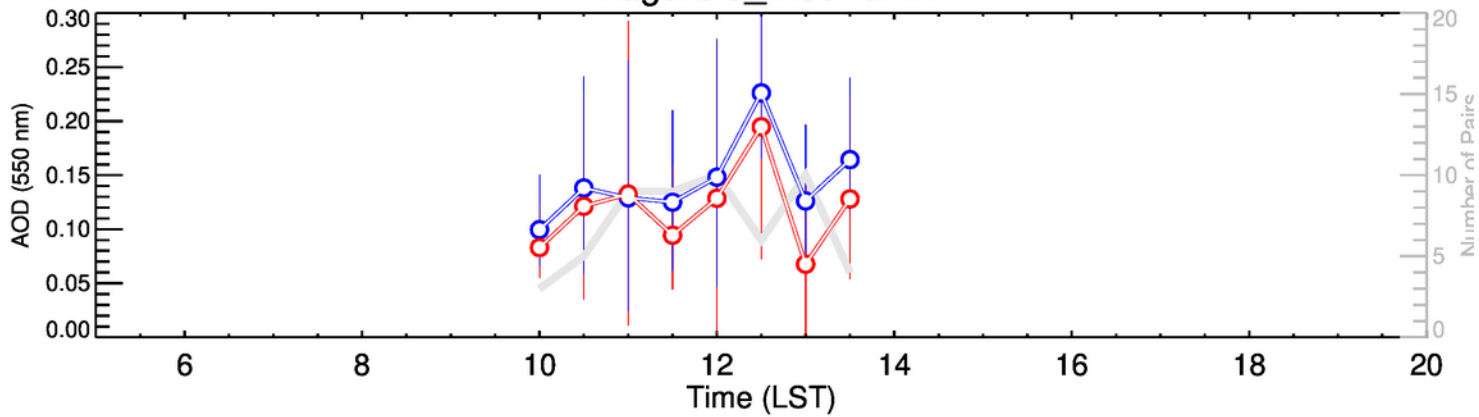

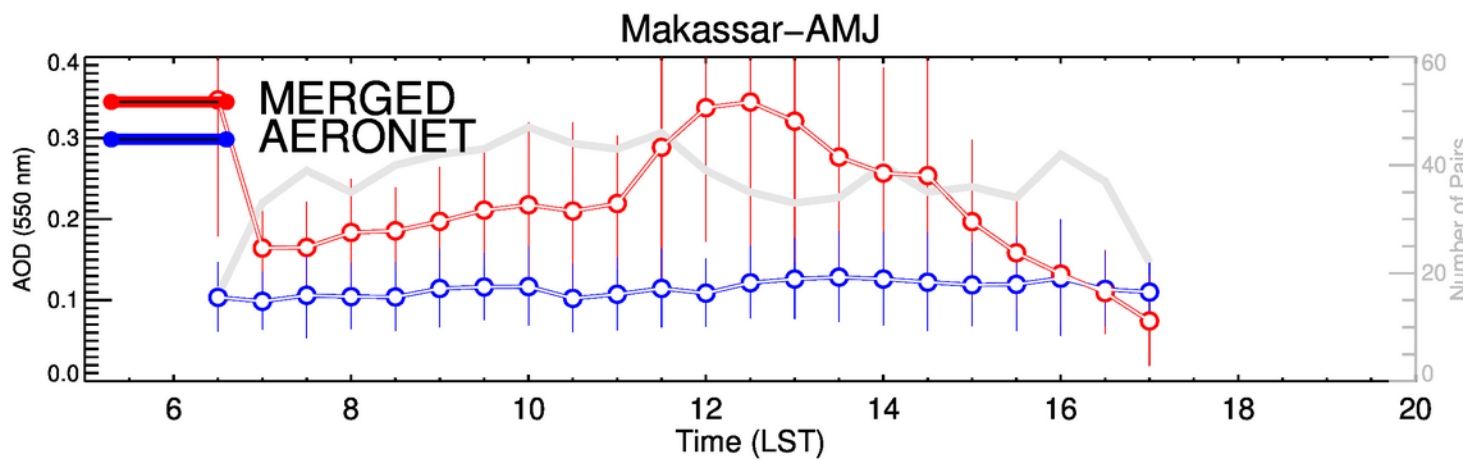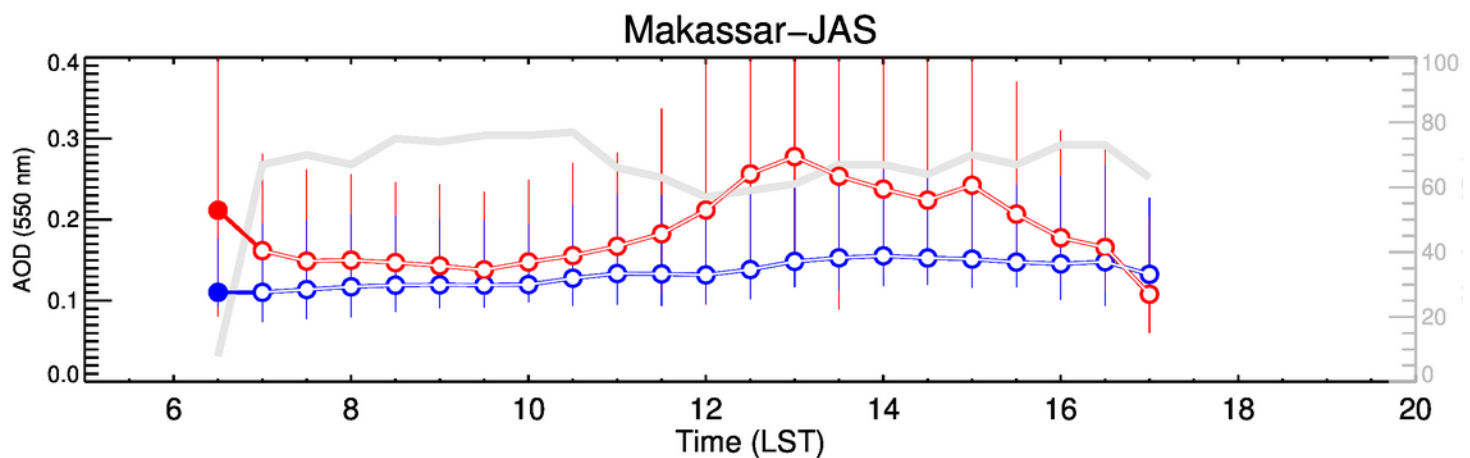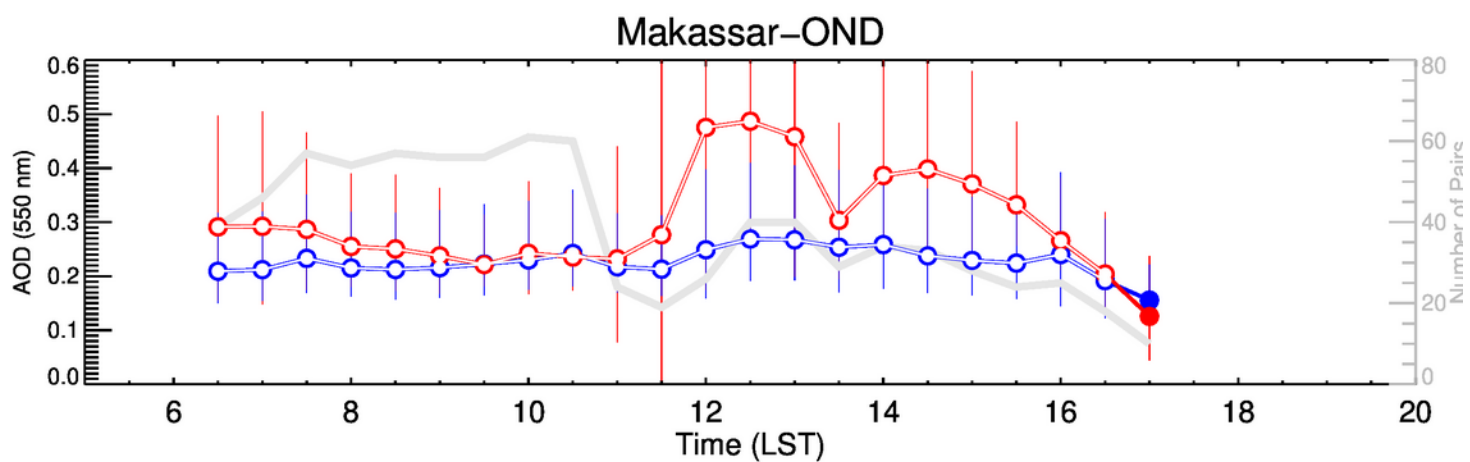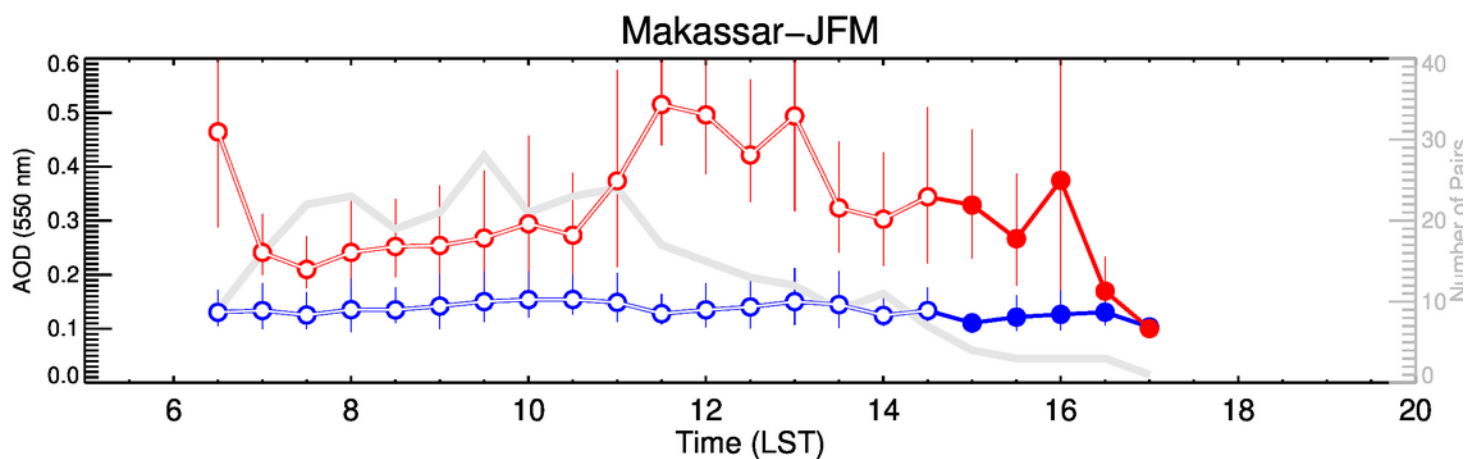

### Maldives\_Gan-JAS

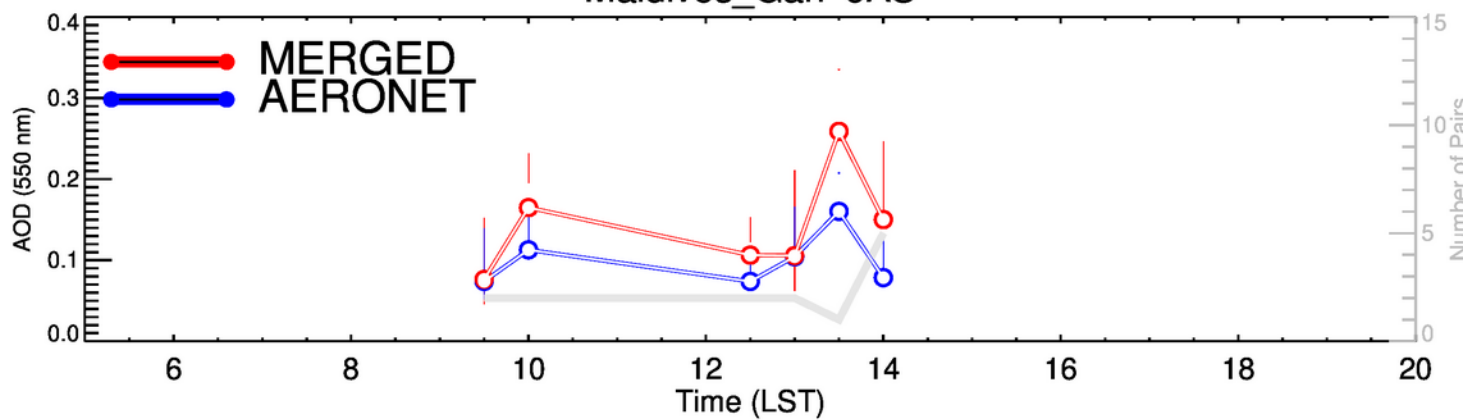

### Maldives\_Gan-OND

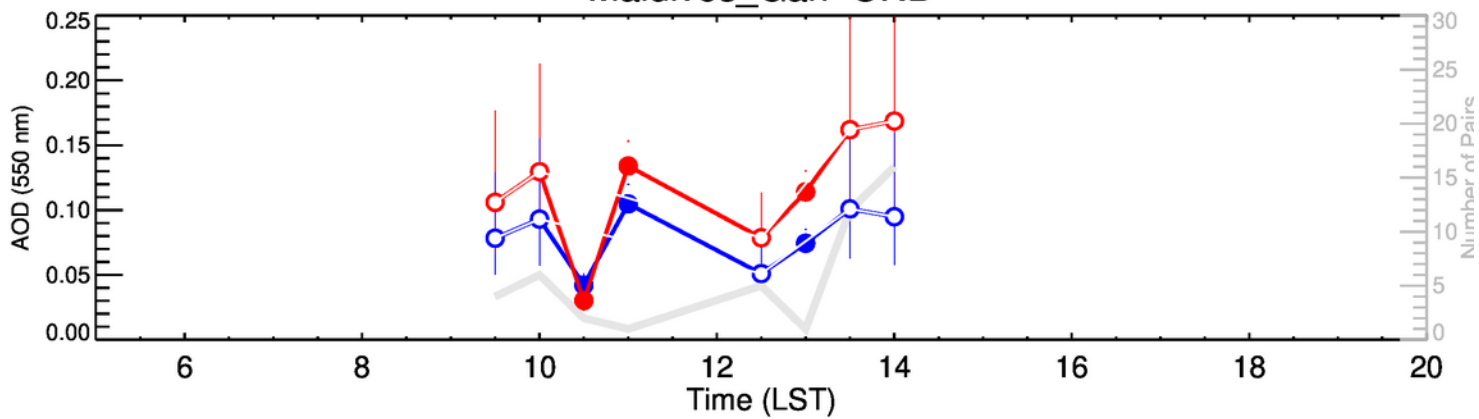

### Maldives\_Gan-JFM

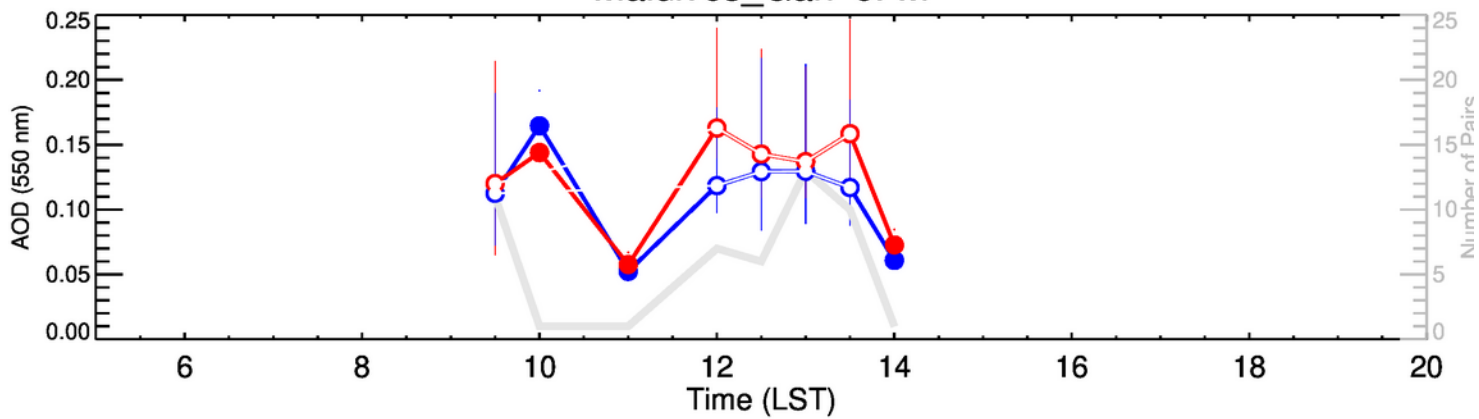

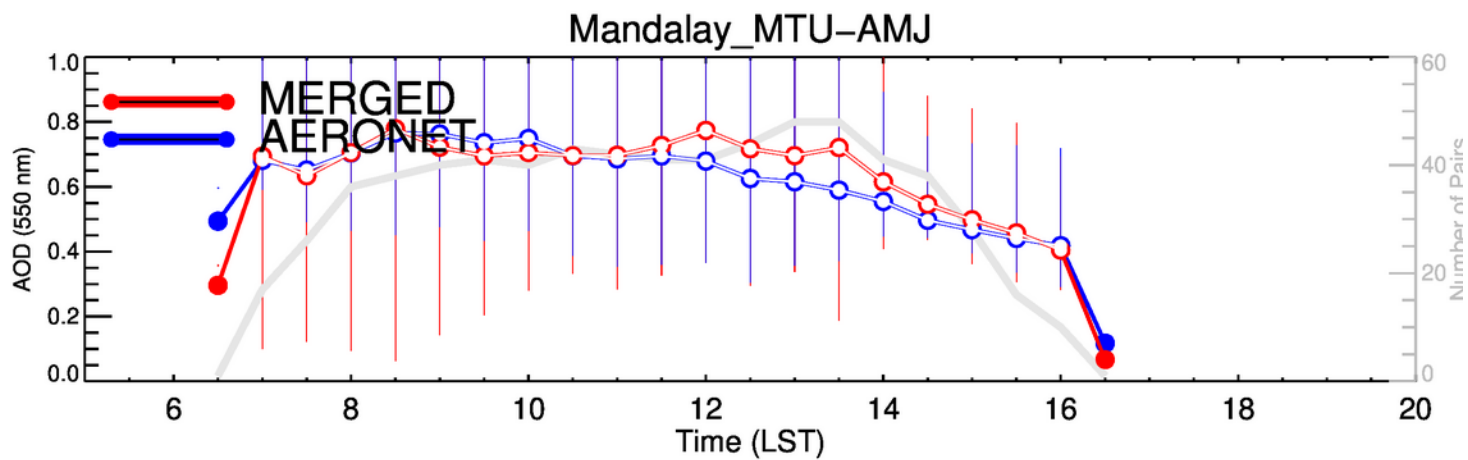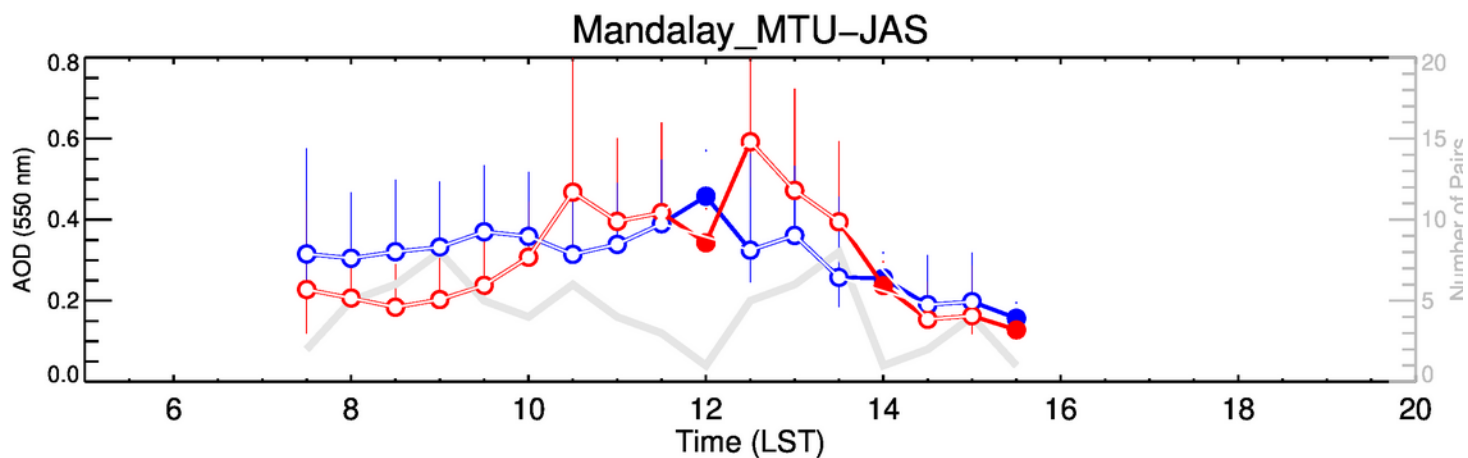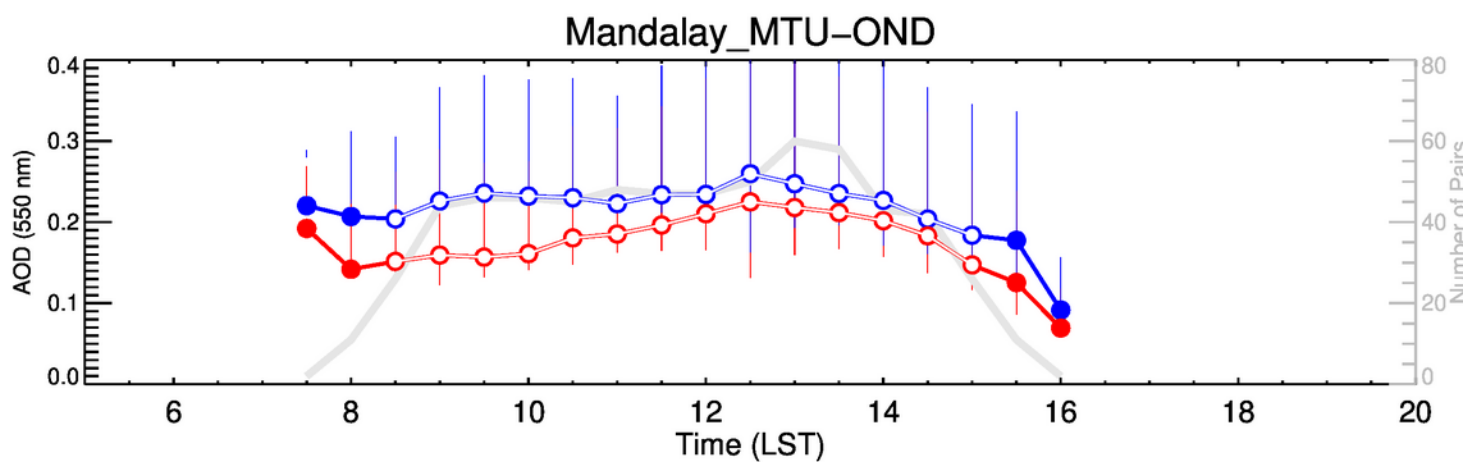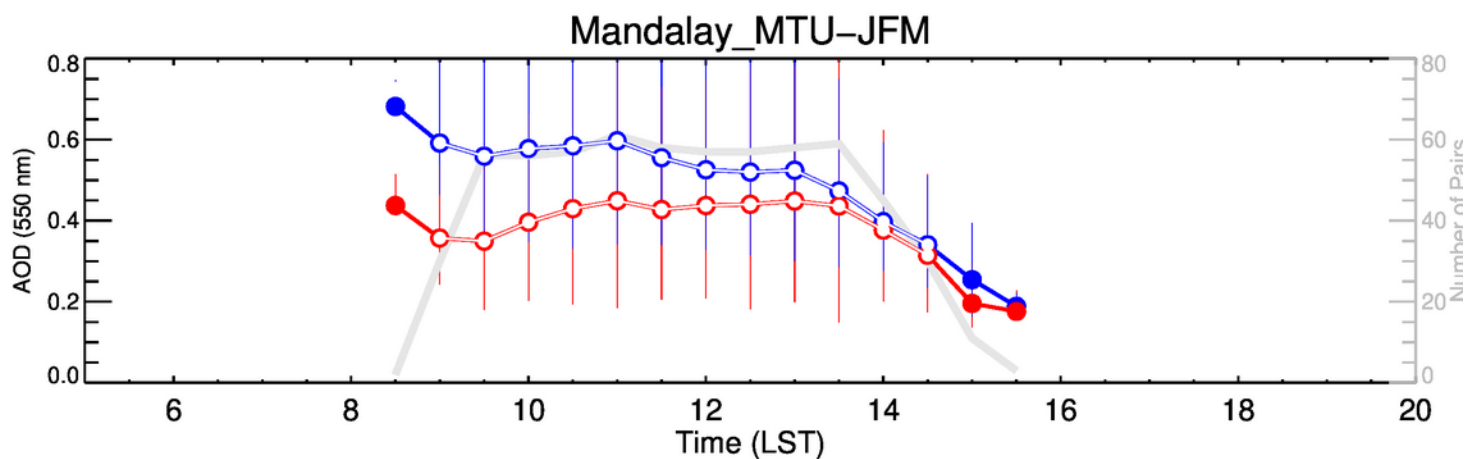

### Manila\_Observatory-AMJ

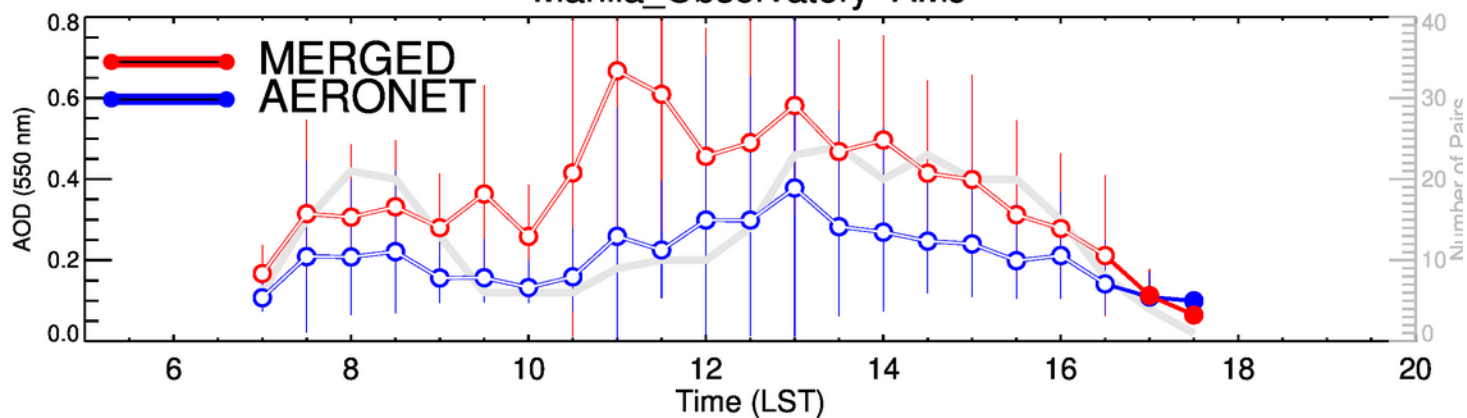

### Manila\_Observatory-JAS

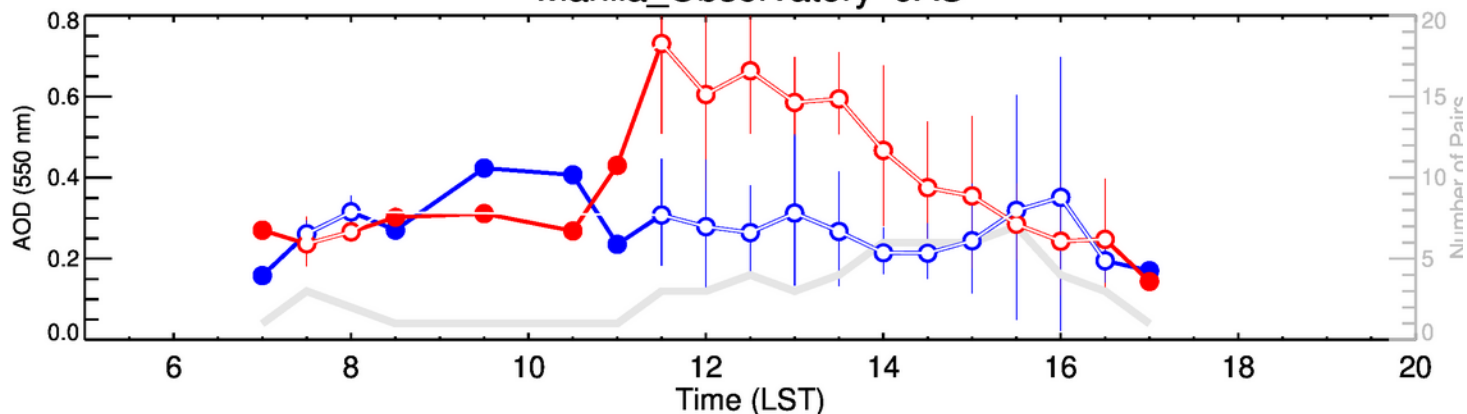

### Manila\_Observatory-OND

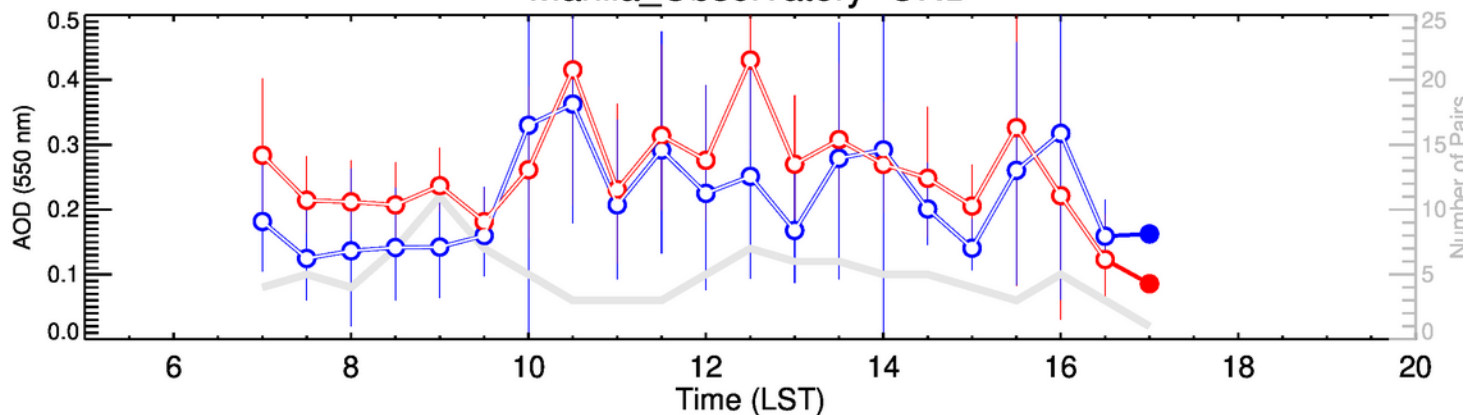

### Manila\_Observatory-JFM

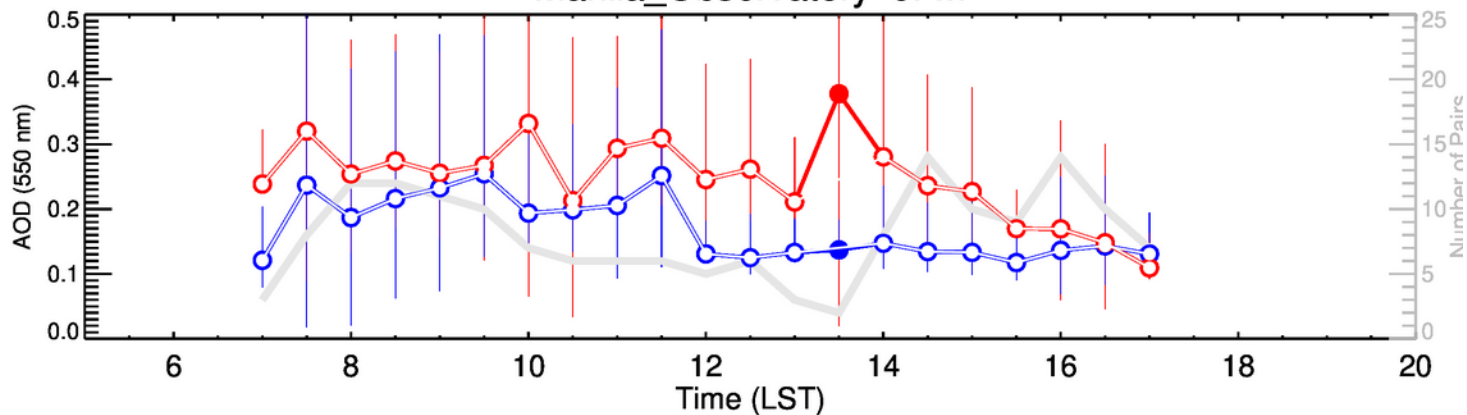

### Mauna\_Loa-AMJ

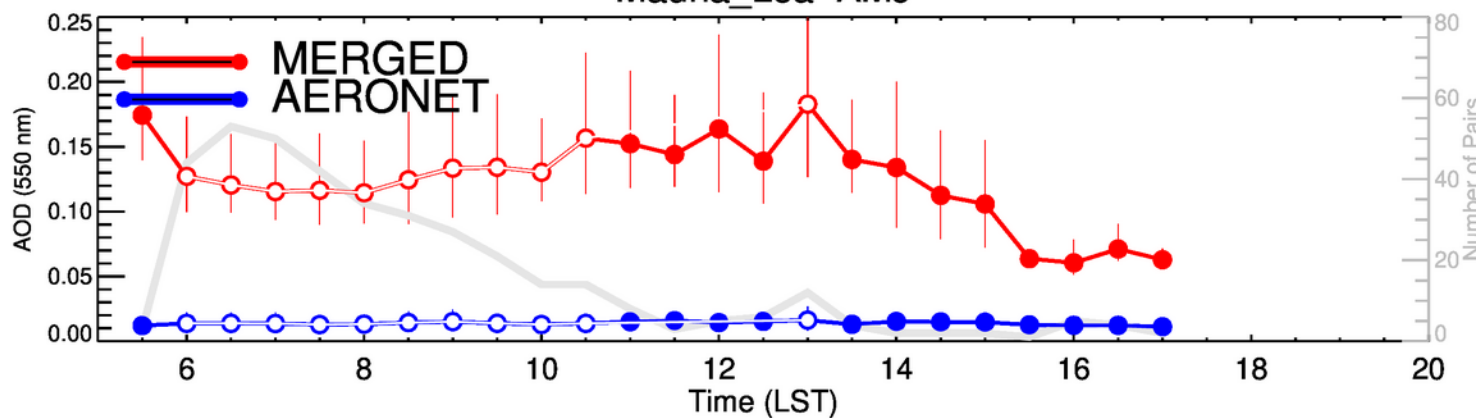

### Mauna\_Loa-JAS

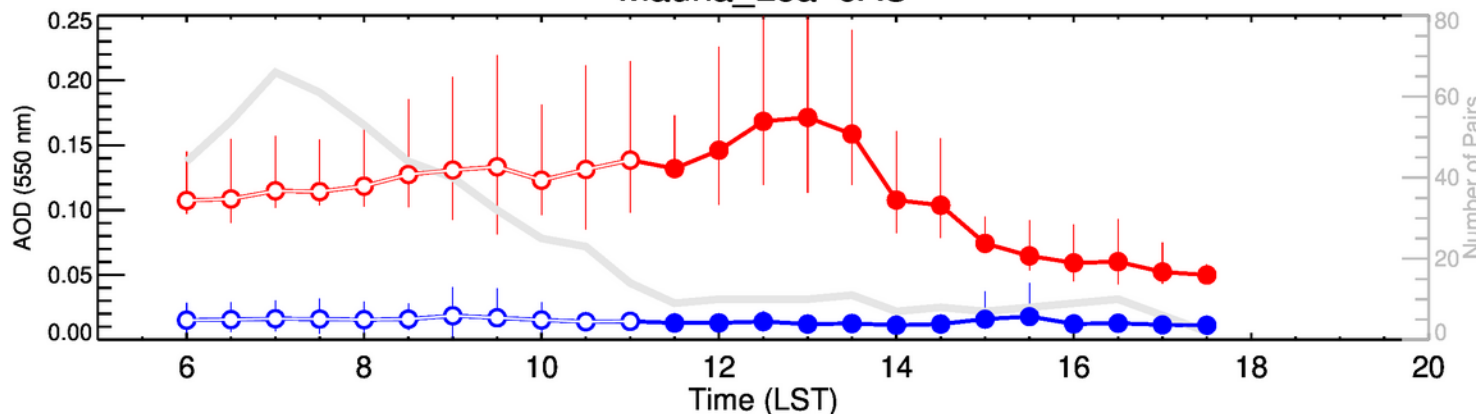

### Mauna\_Loa-OND

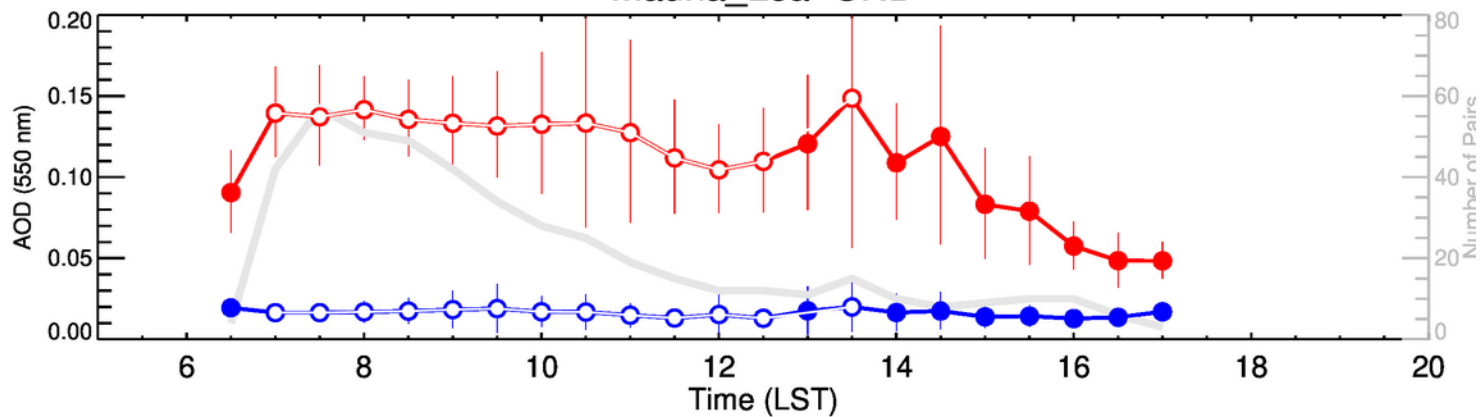

### Mauna\_Loa-JFM

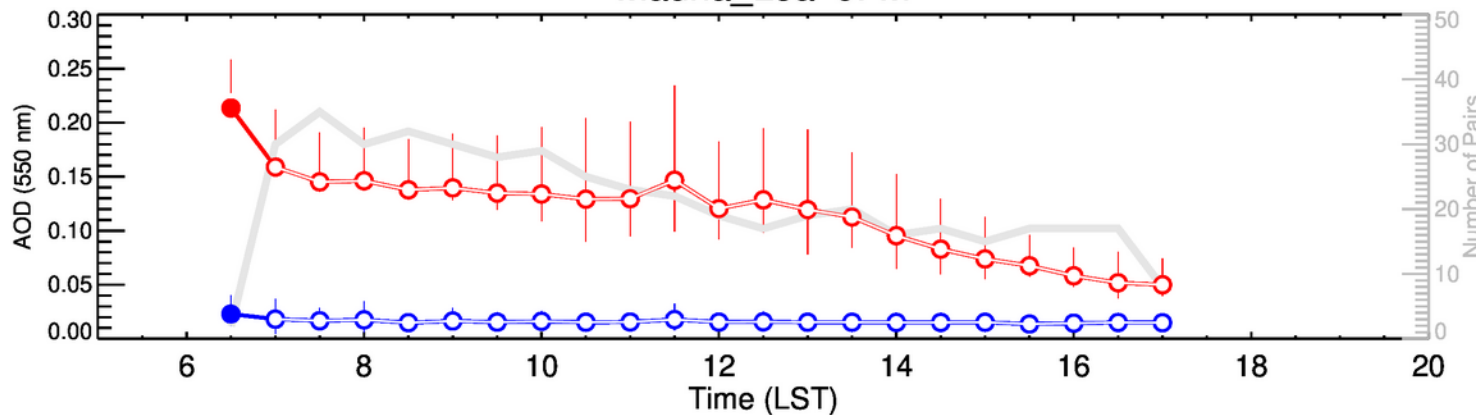



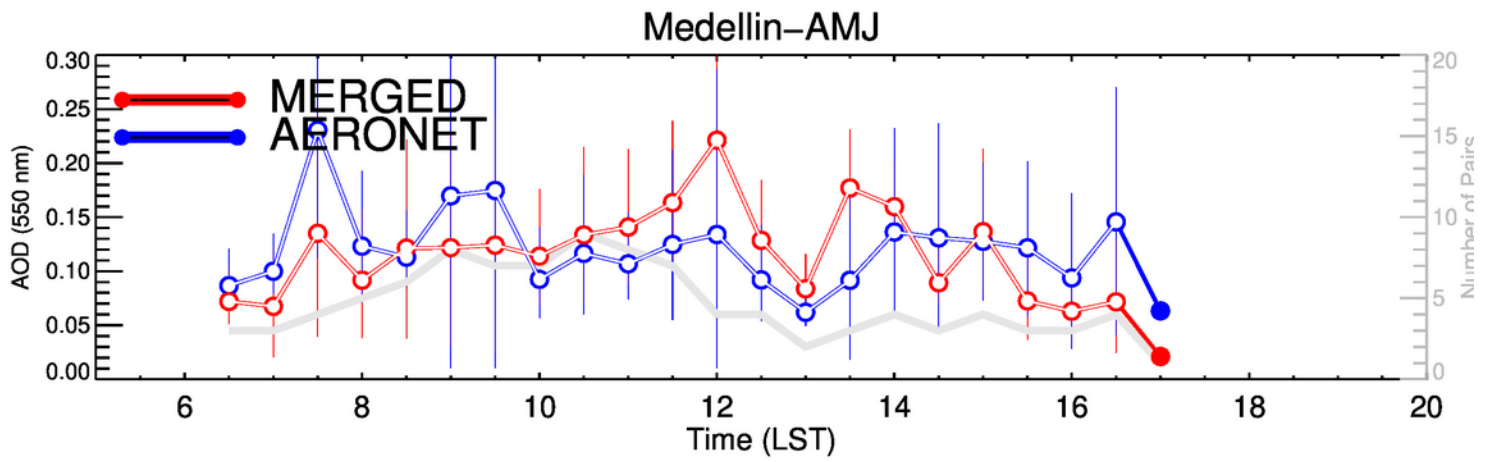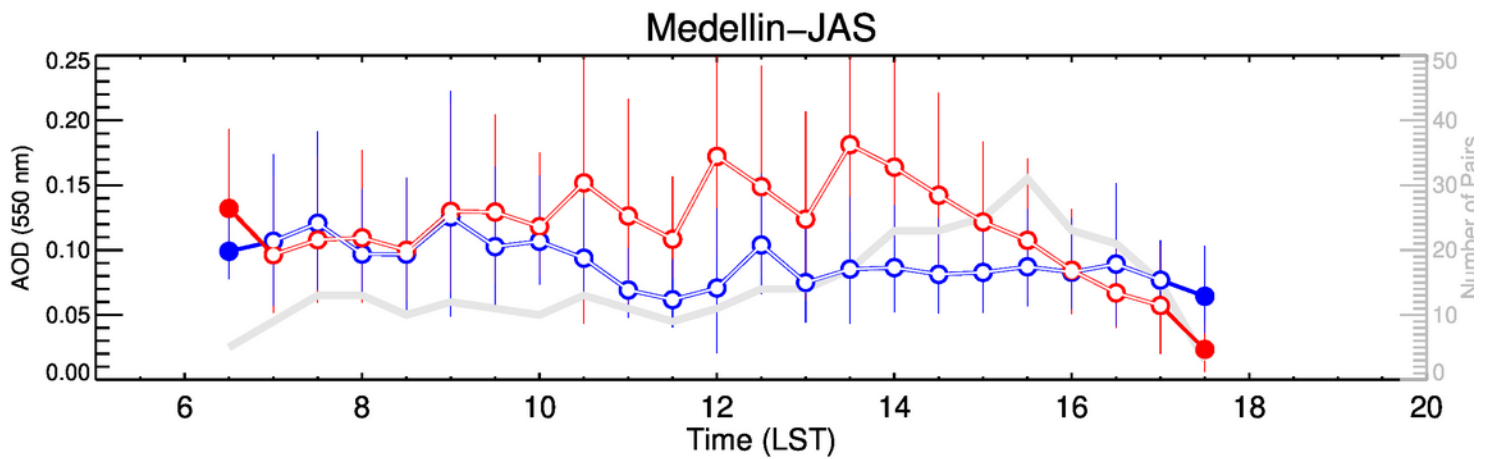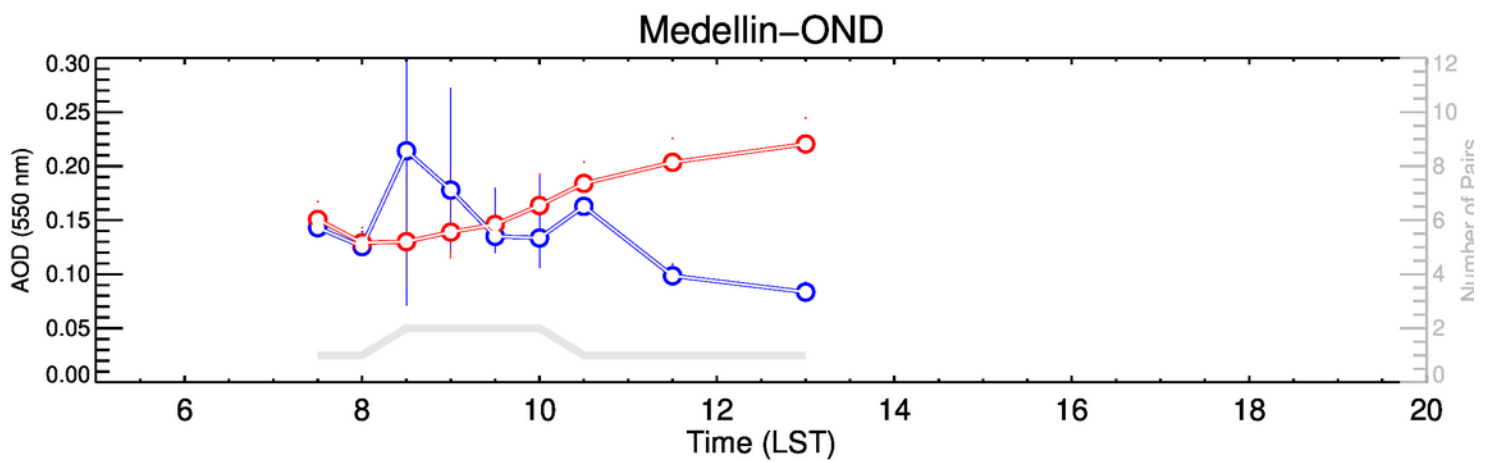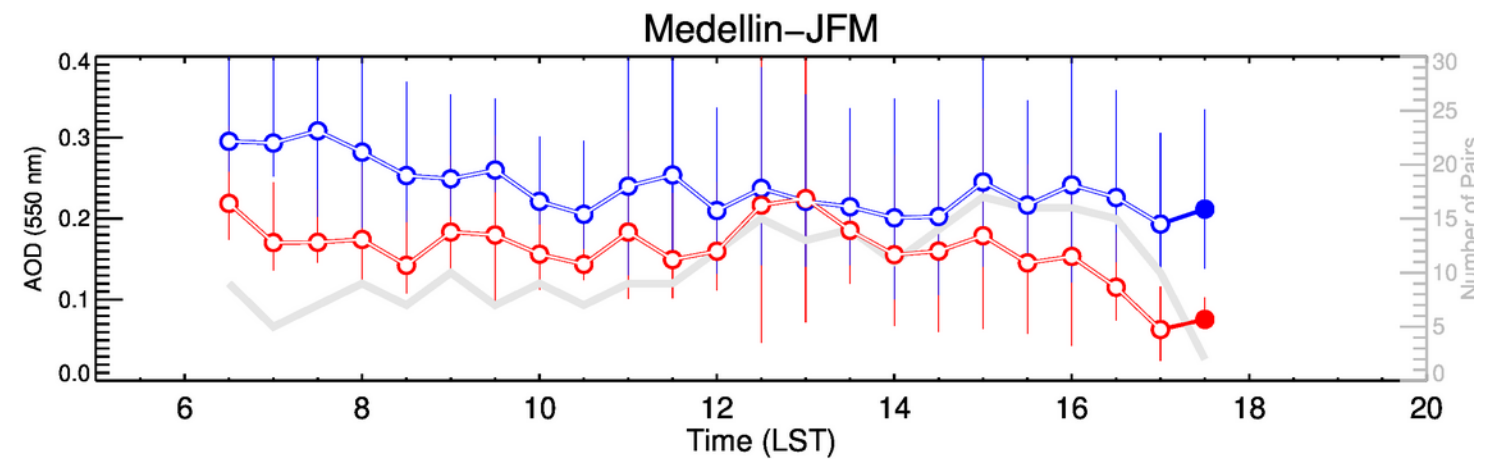

Medenine-IRA-AMJ

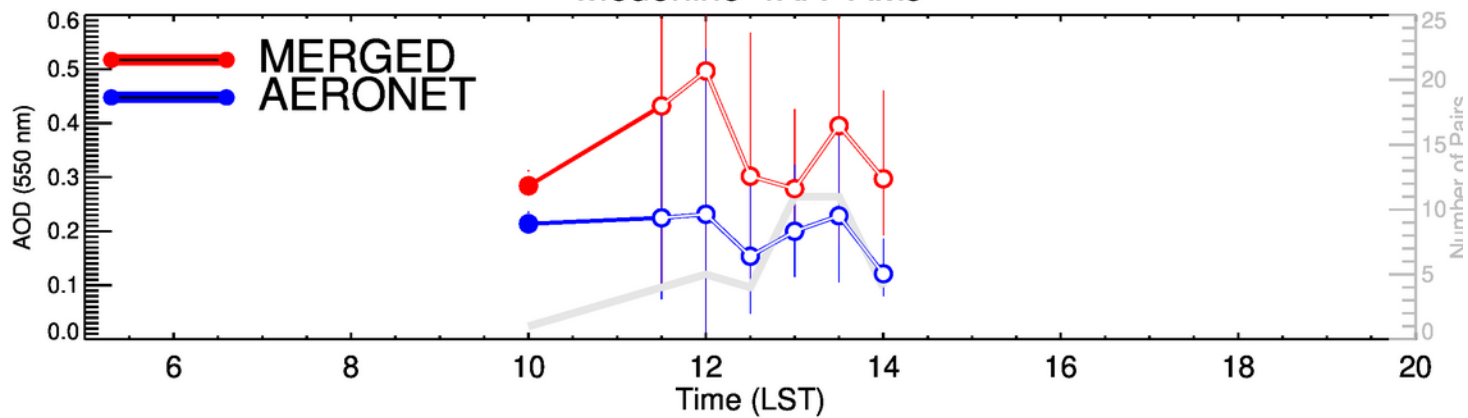

Medenine-IRA-JAS

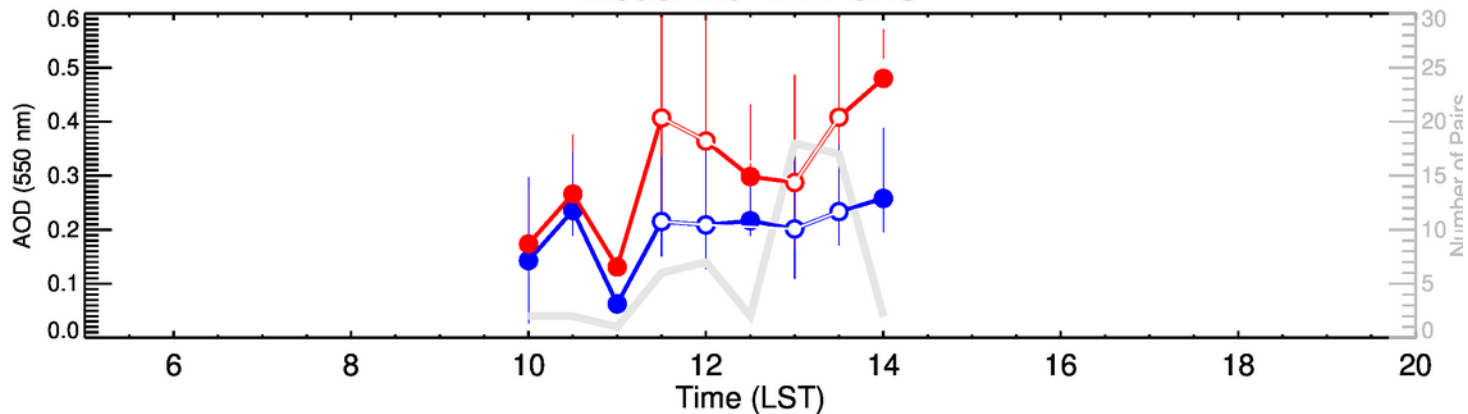

Medenine-IRA-OND

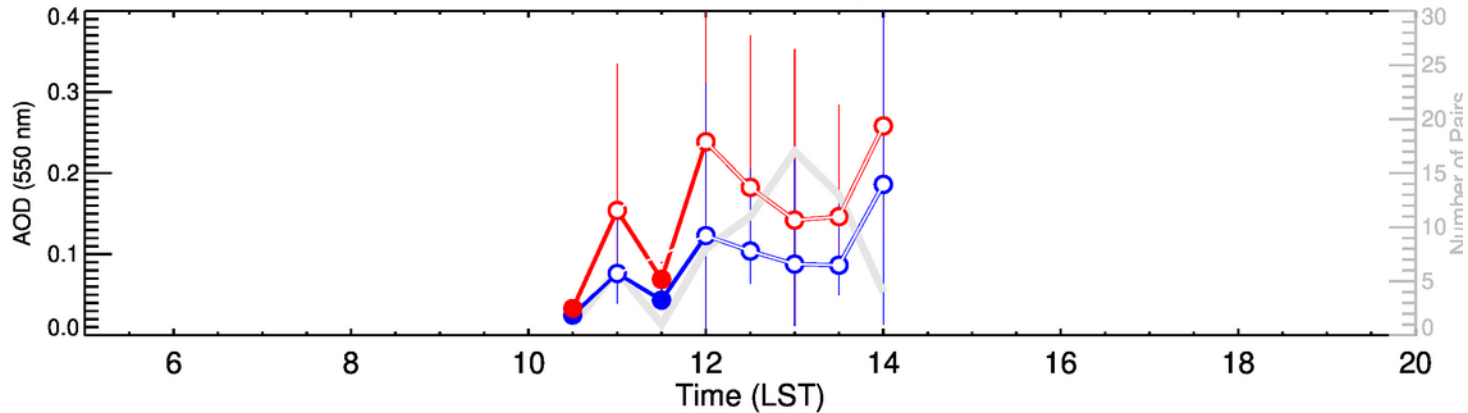

Medenine-IRA-JFM

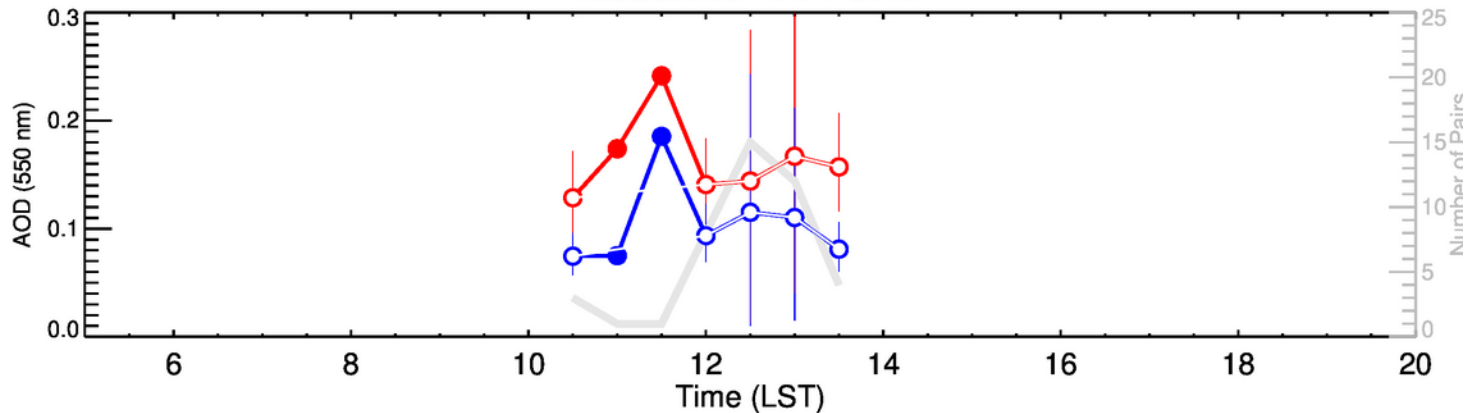

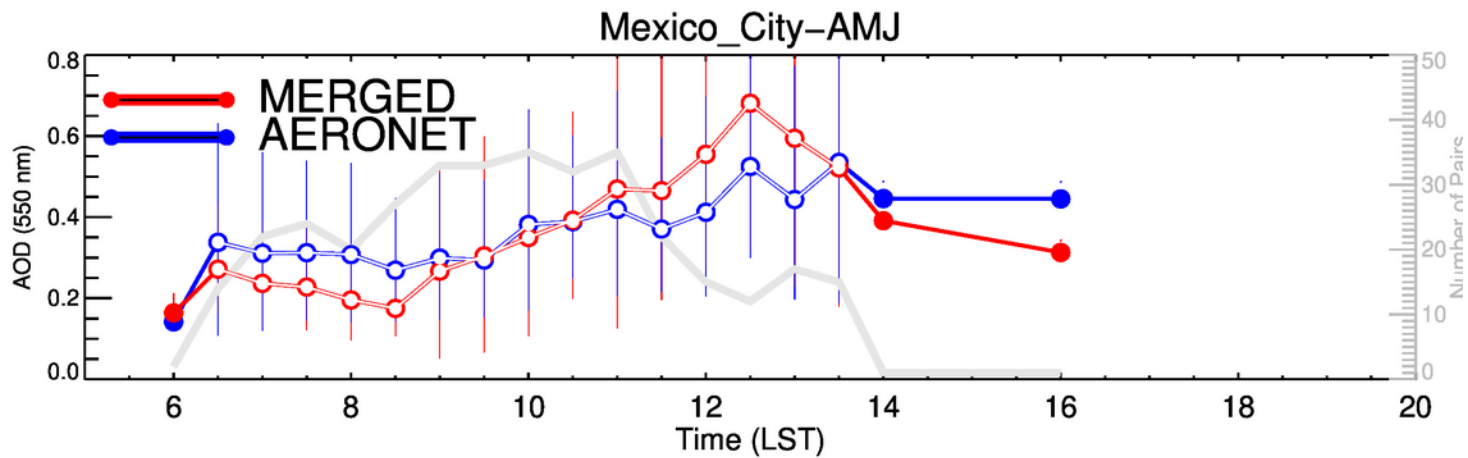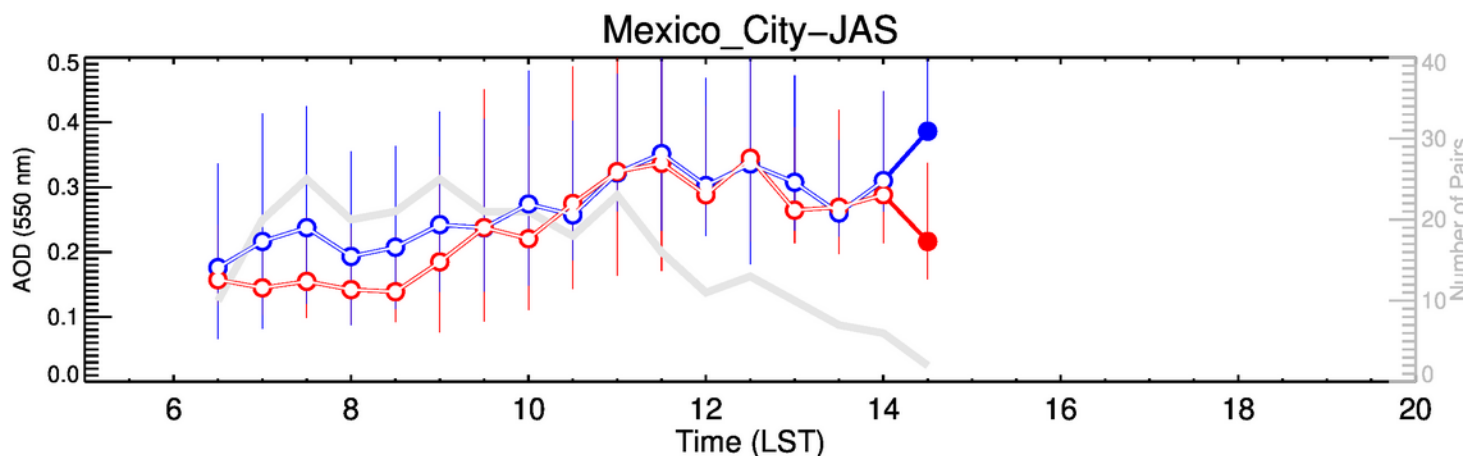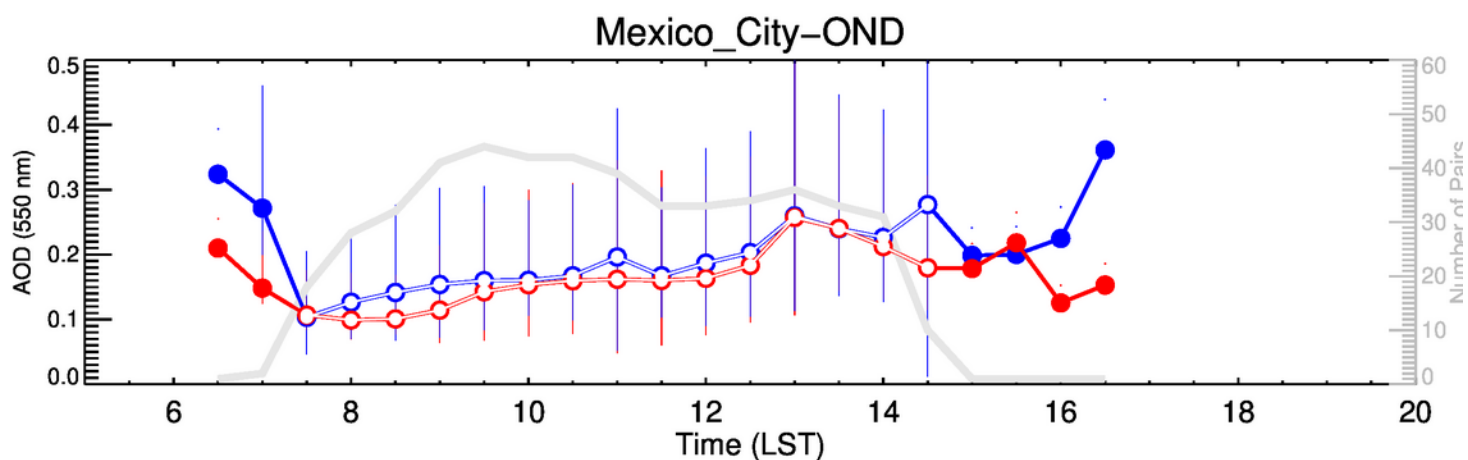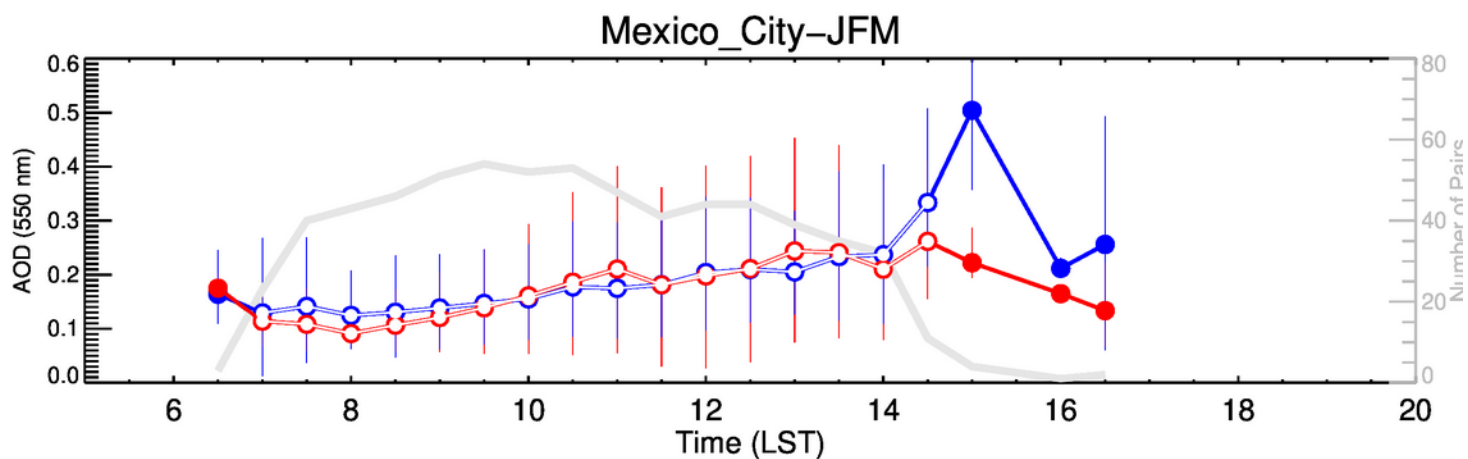

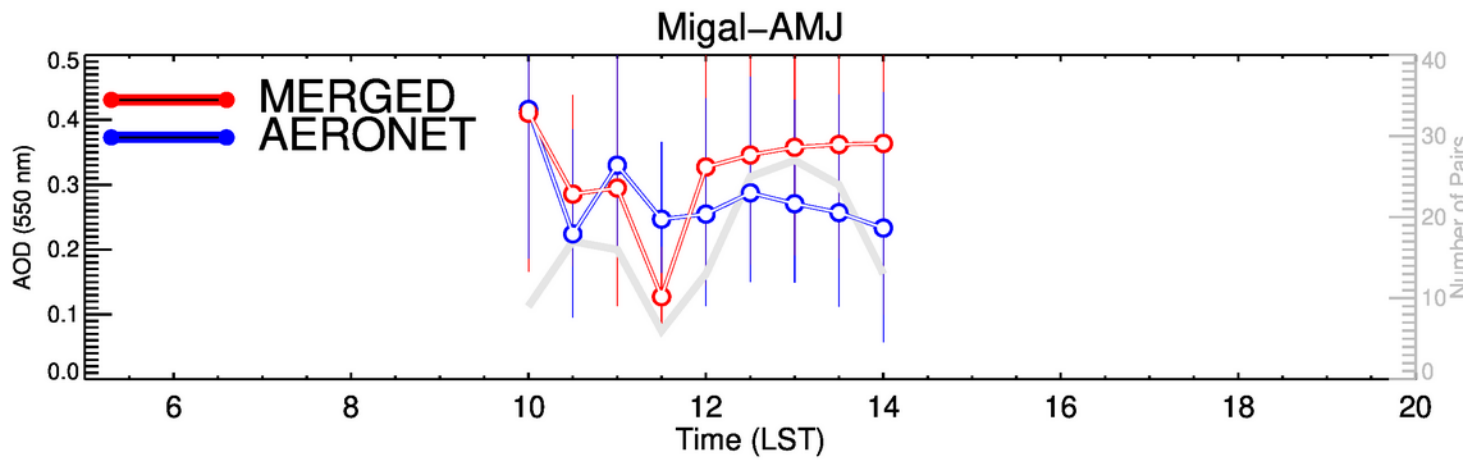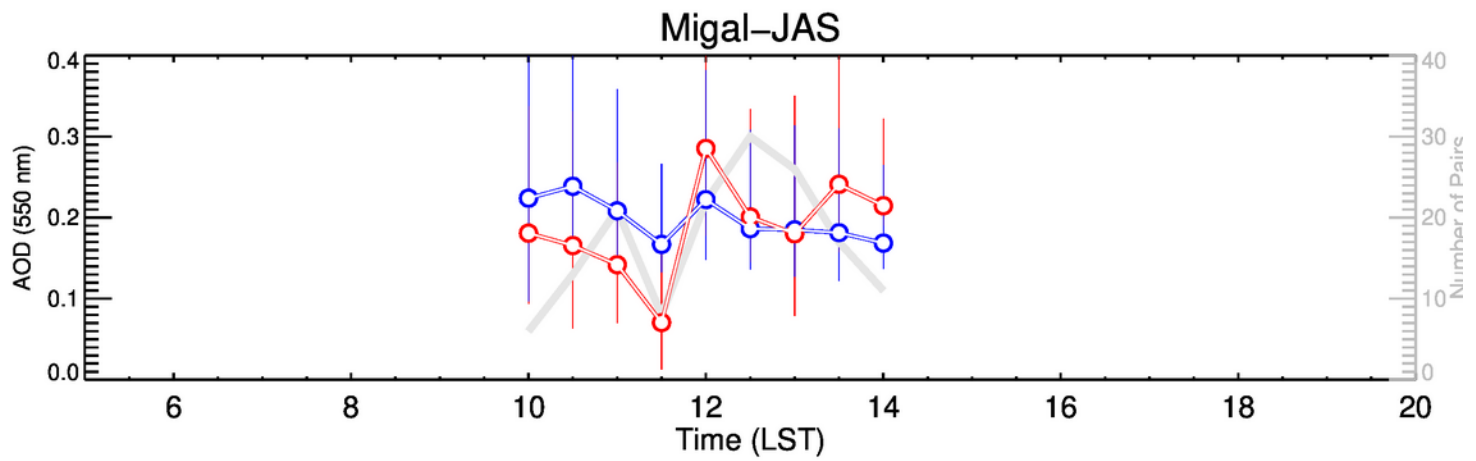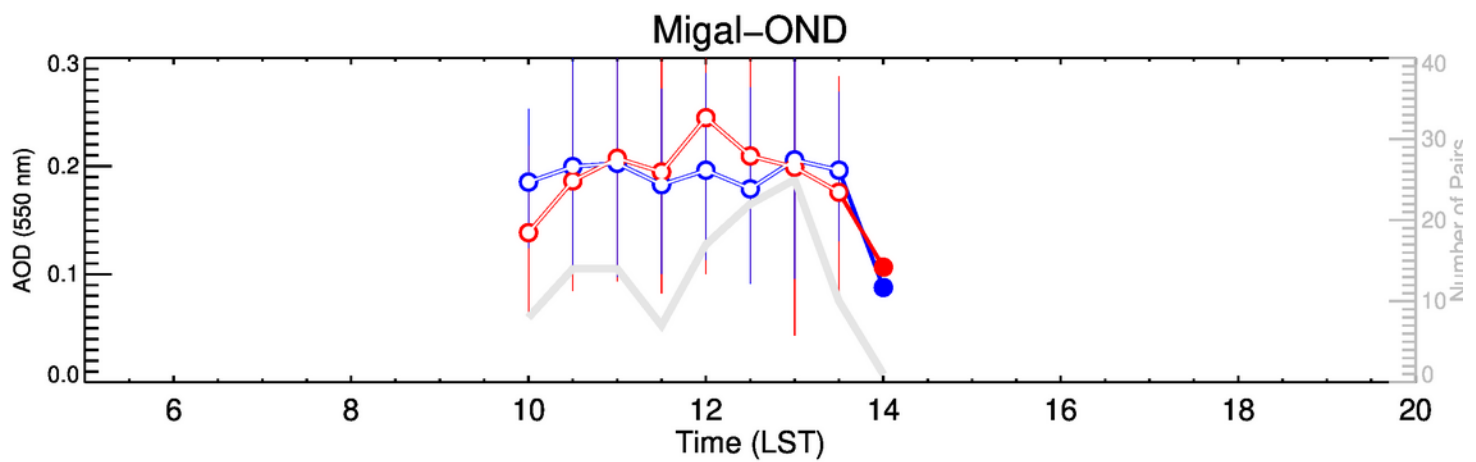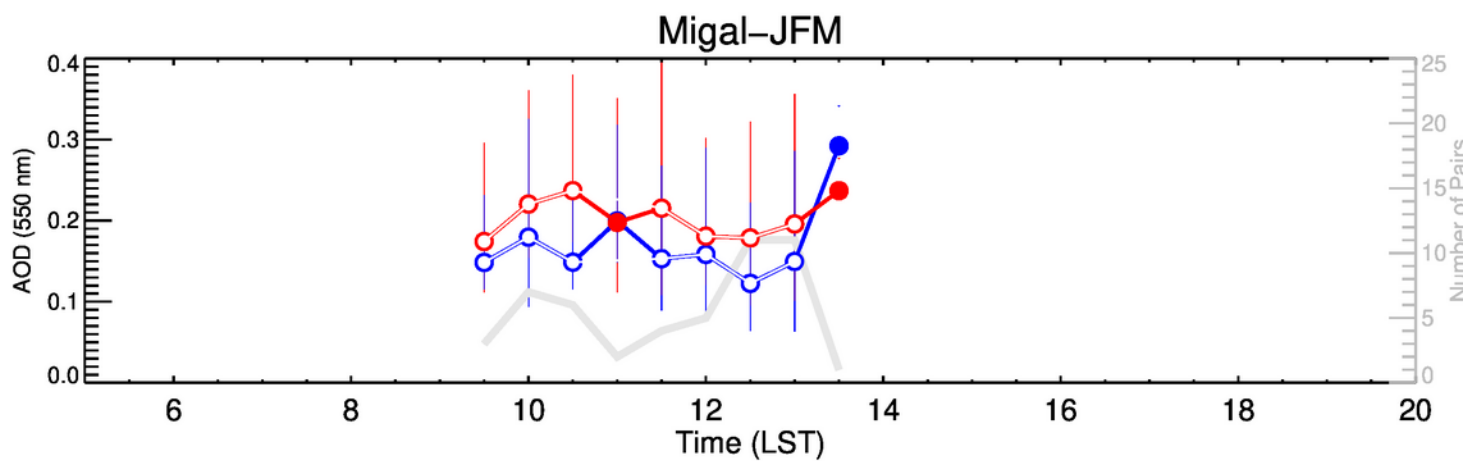

### Mingo-AMJ

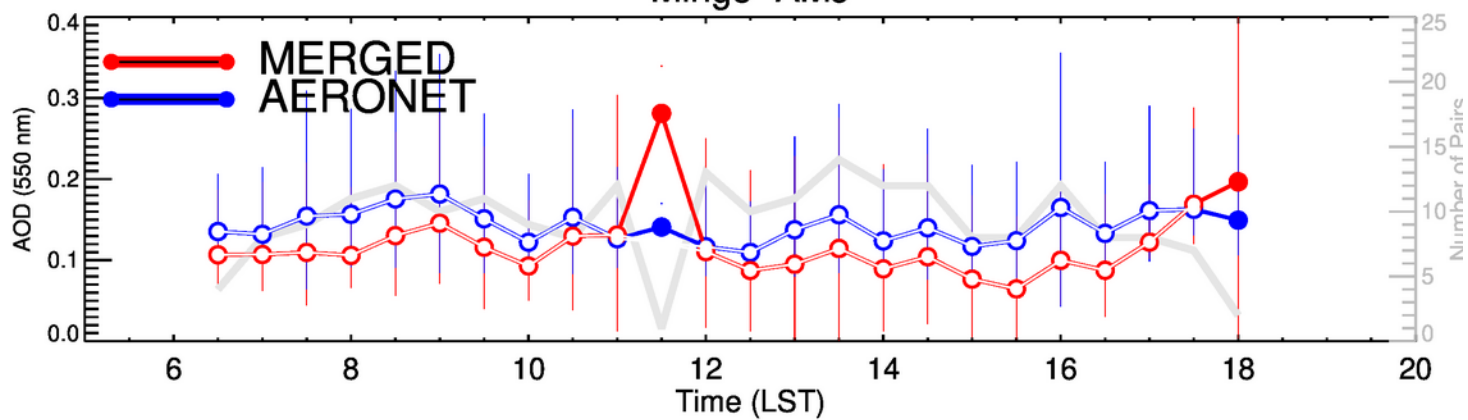

### Mingo-JAS

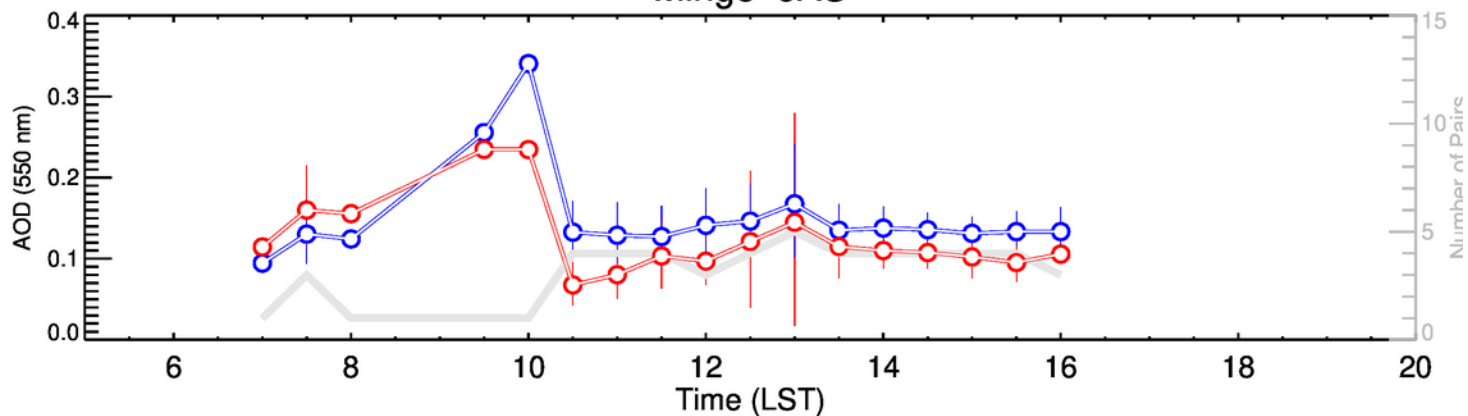

### Mingo-OND

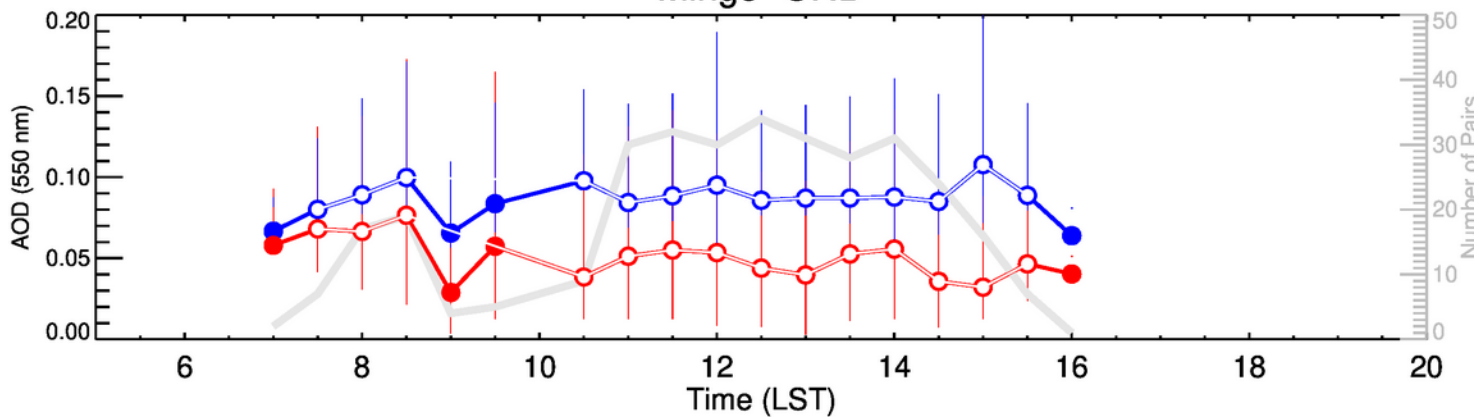

### Mingo-JFM

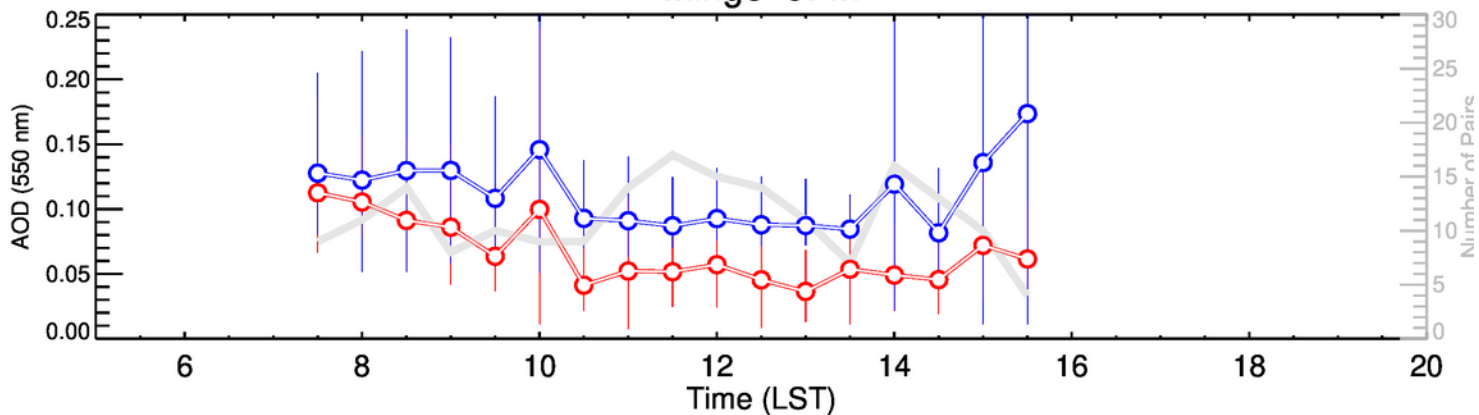

### Monterey-AMJ

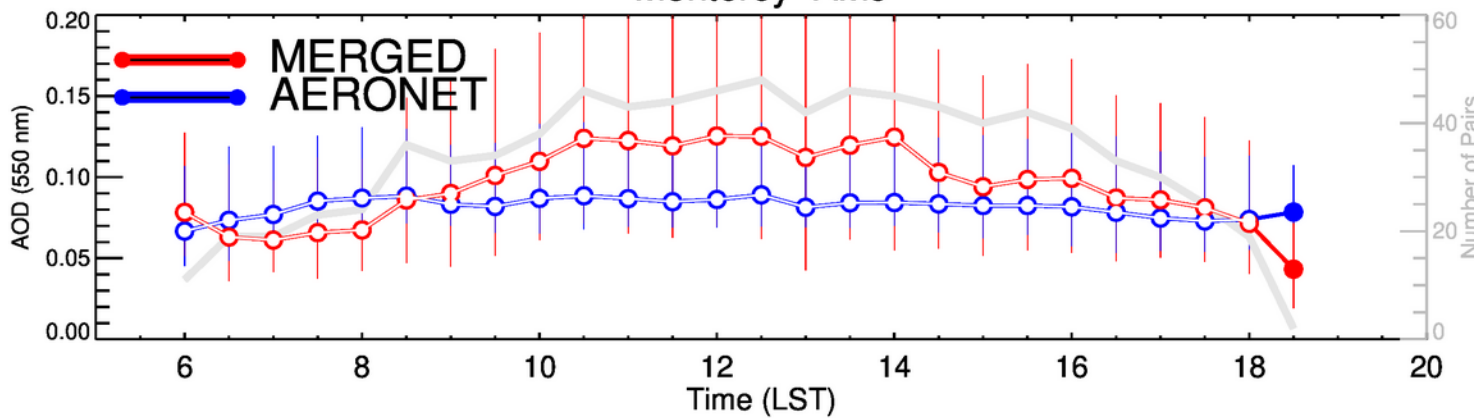

### Monterey-JAS

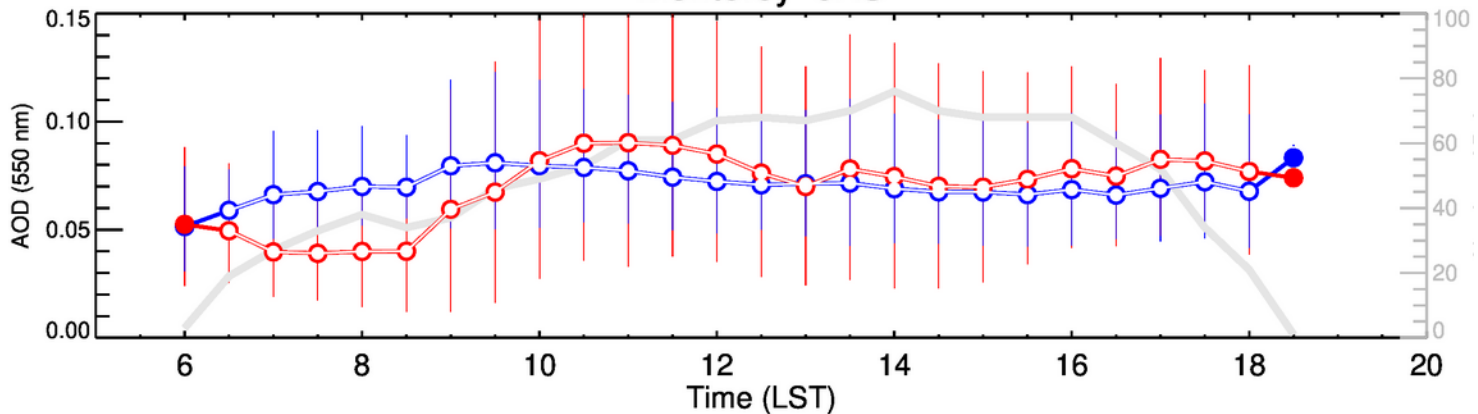

### Monterey-OND

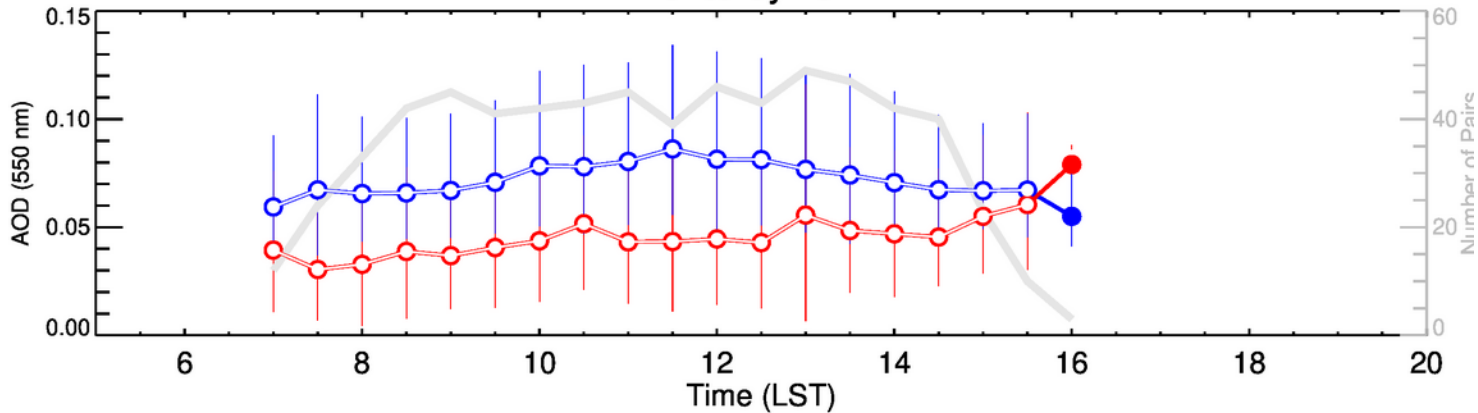

### Monterey-JFM

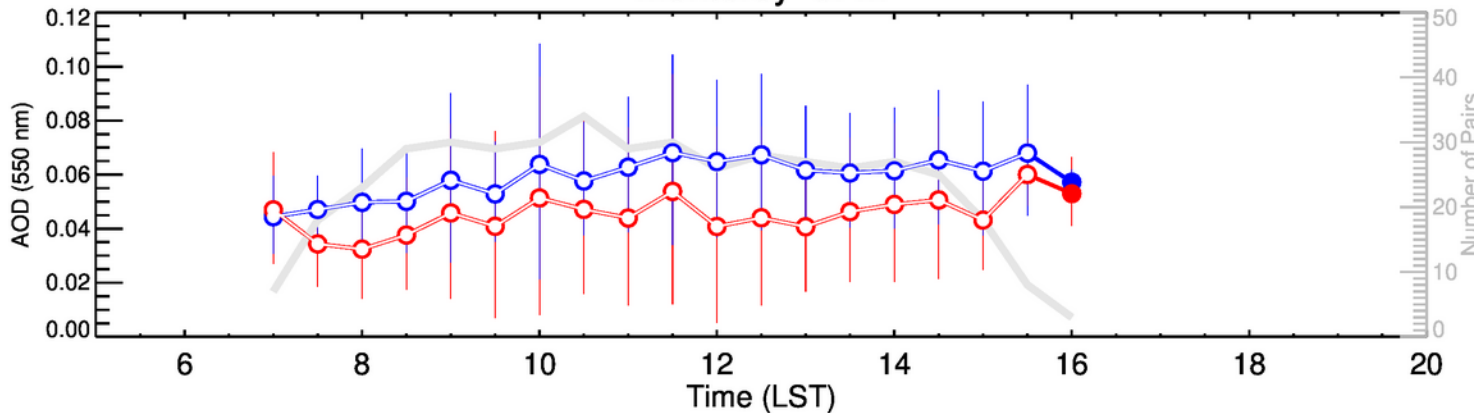

### Mount\_Wilson-AMJ

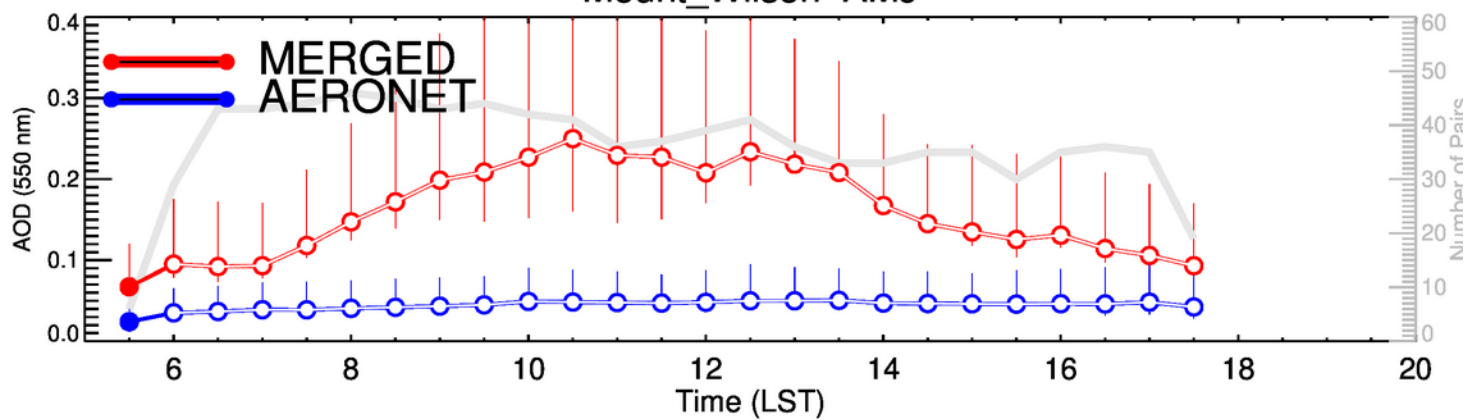

### Mount\_Wilson-JAS

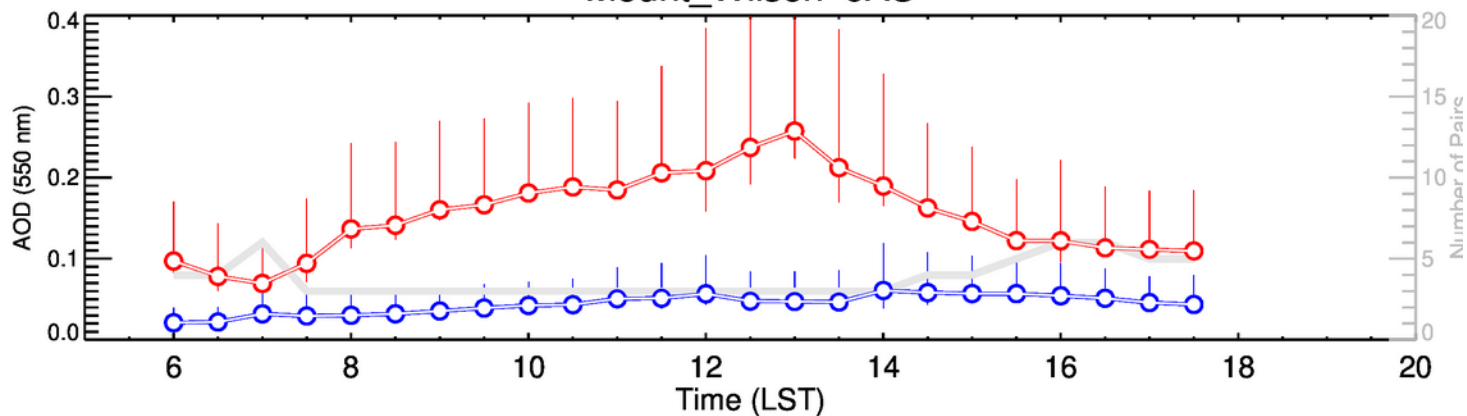

### Mount\_Wilson-OND

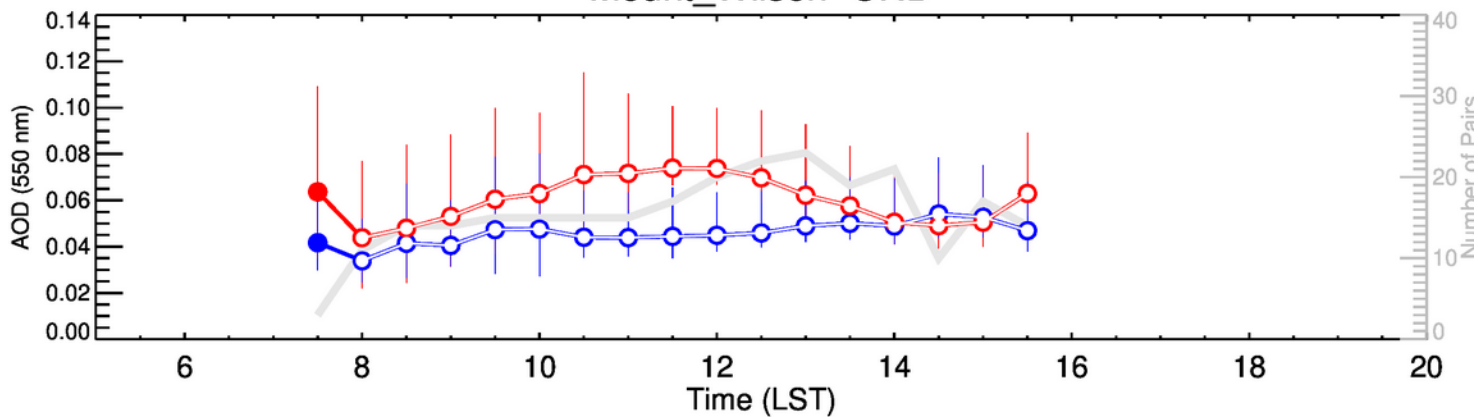

### Mount\_Wilson-JFM

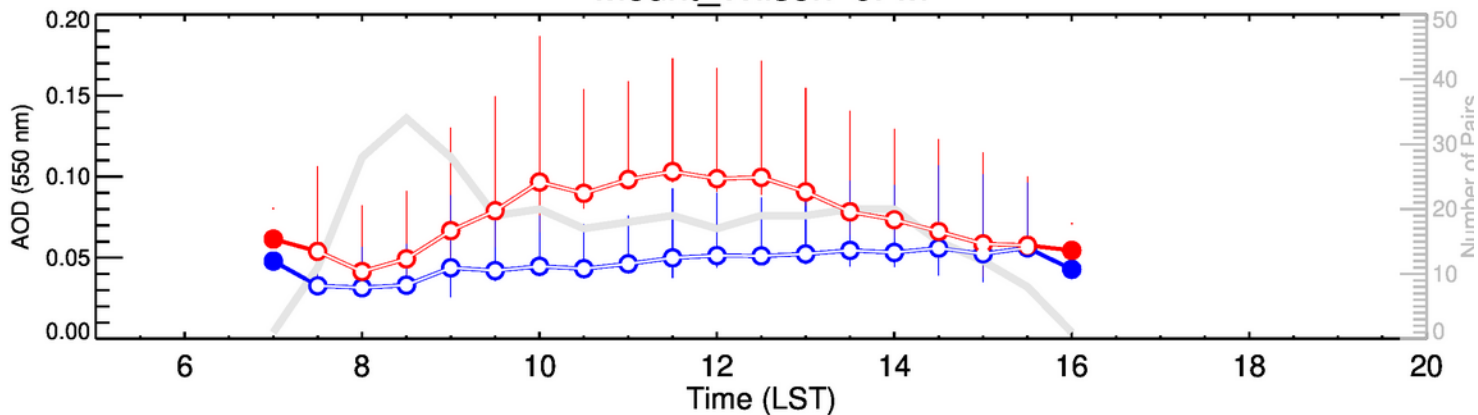

### Napoli\_CeSMA-AMJ

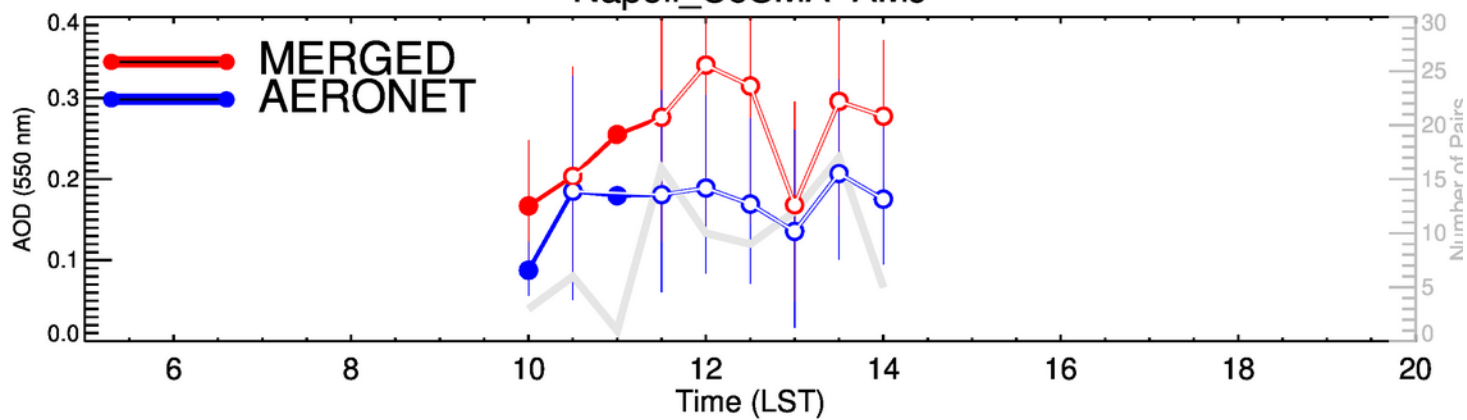

### Napoli\_CeSMA-JAS

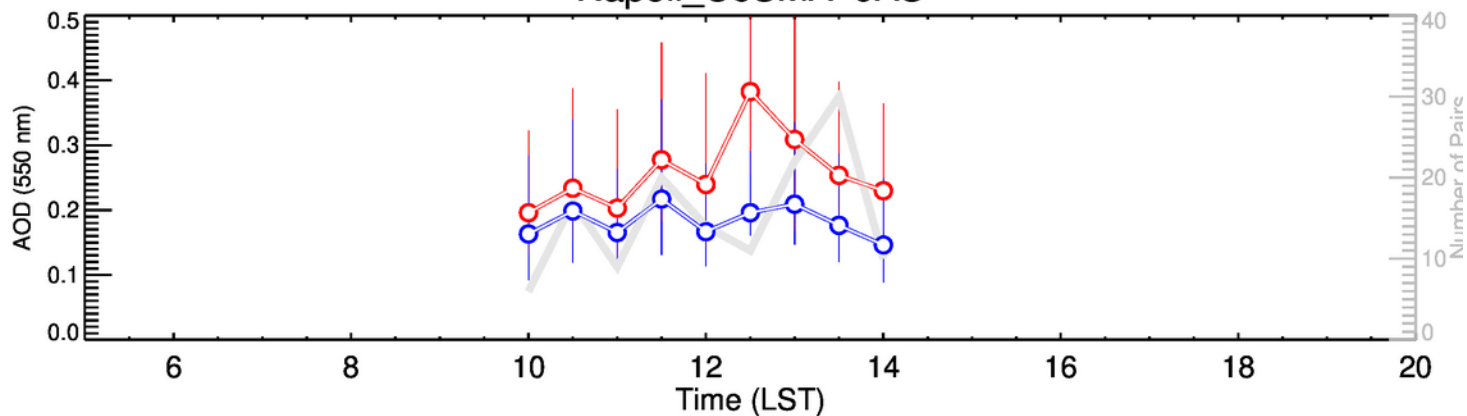

### Napoli\_CeSMA-OND

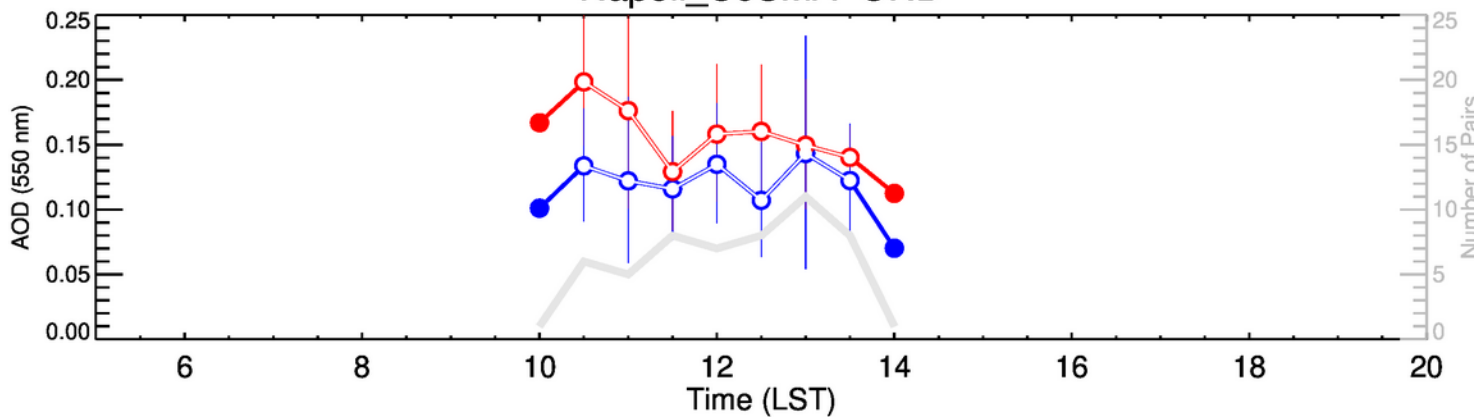

### Napoli\_CeSMA-JFM

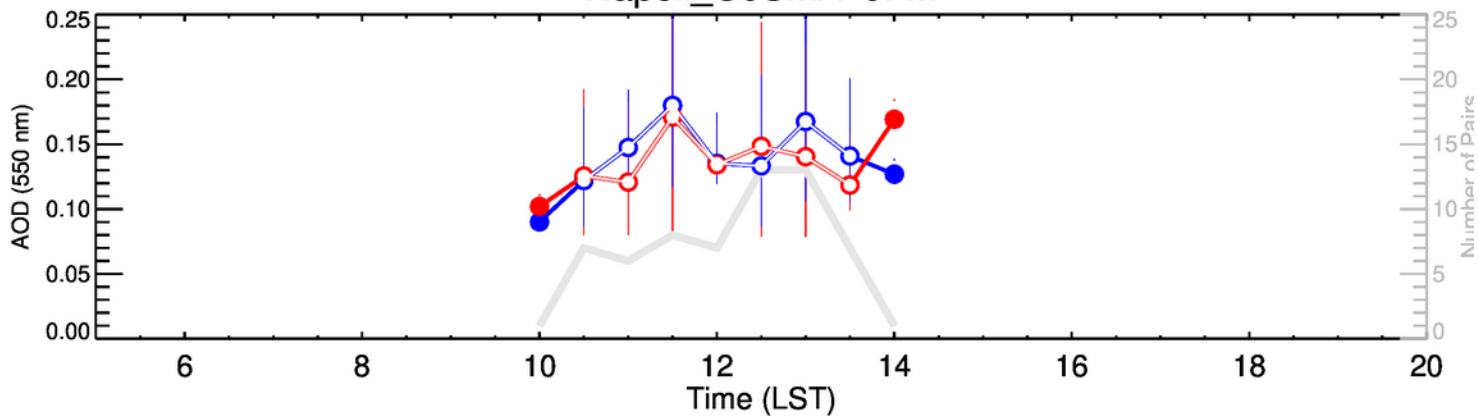



NASA\_KSC-AMJ

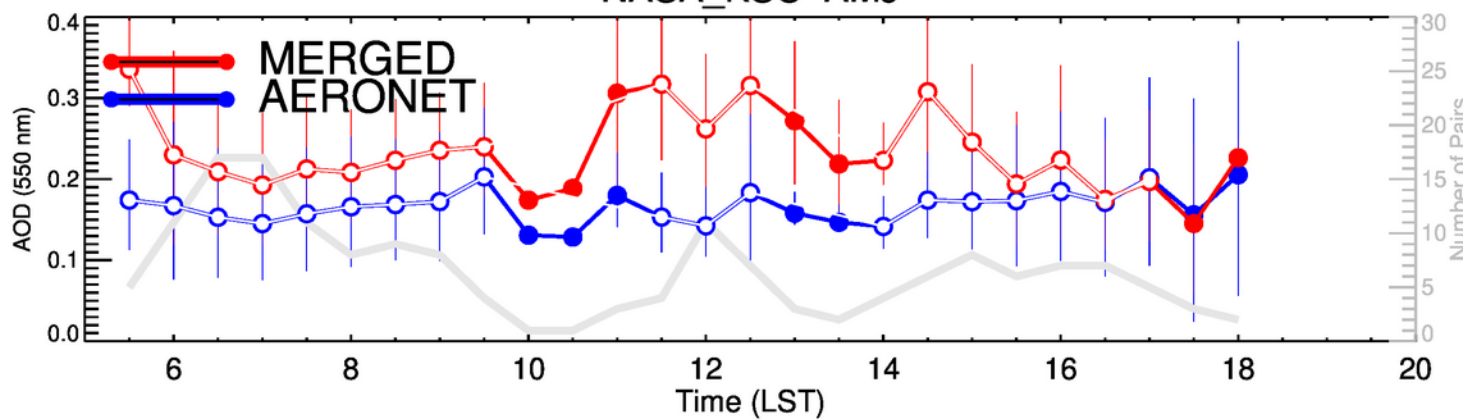

NASA\_KSC-JAS

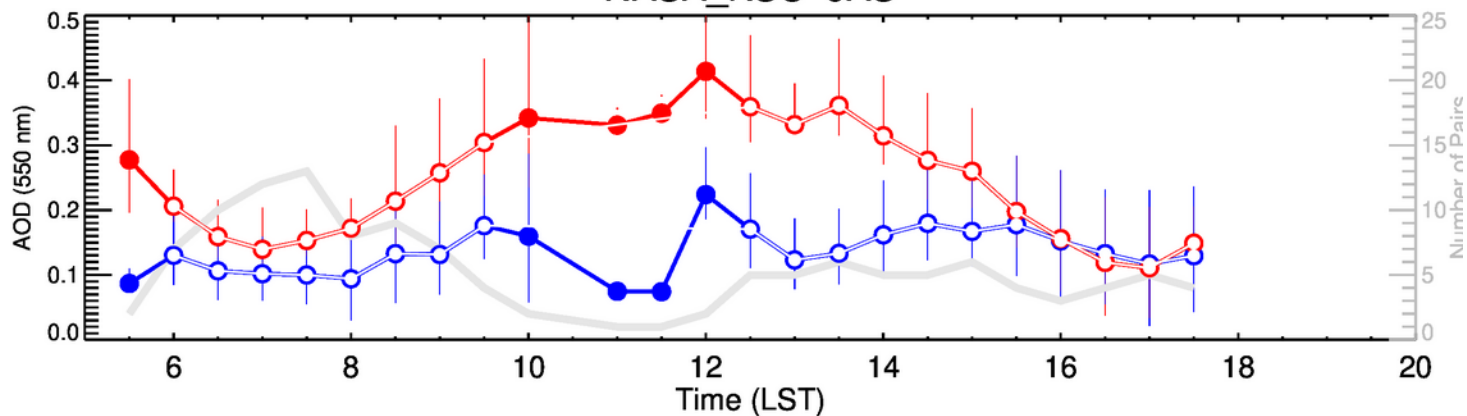

NASA\_KSC-OND

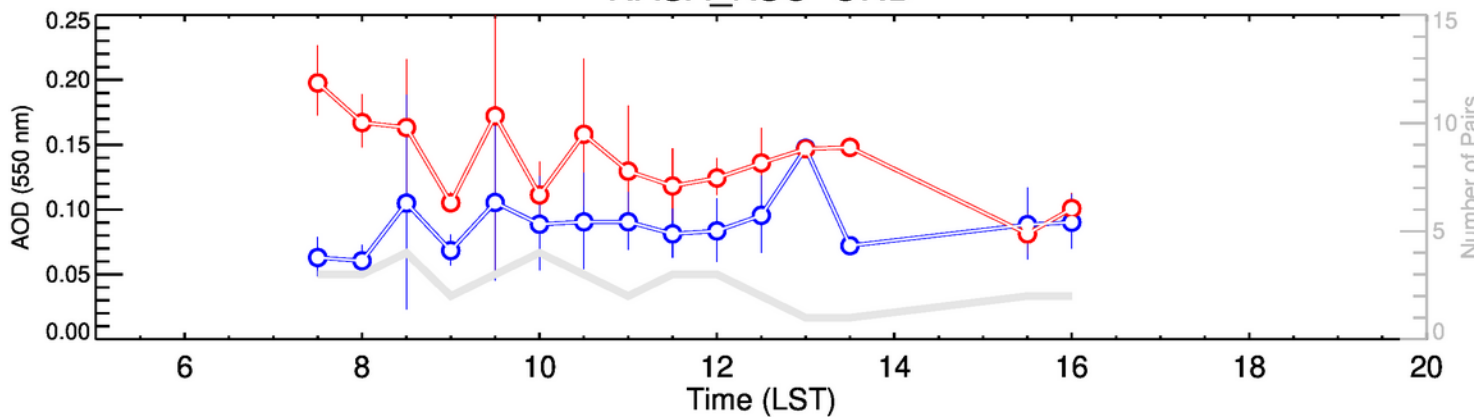

NASA\_KSC-JFM

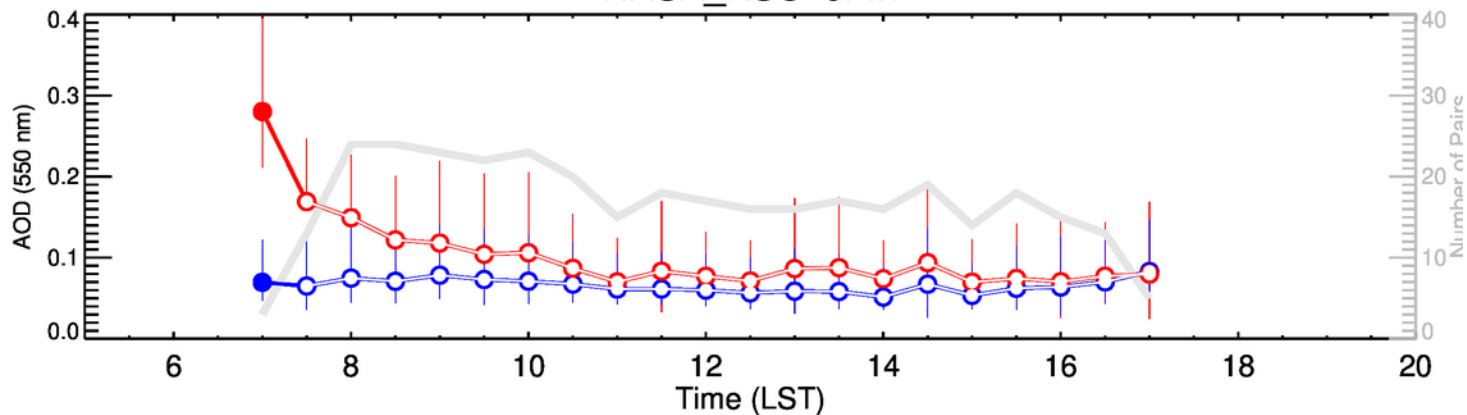

NASA\_LaRC-AMJ

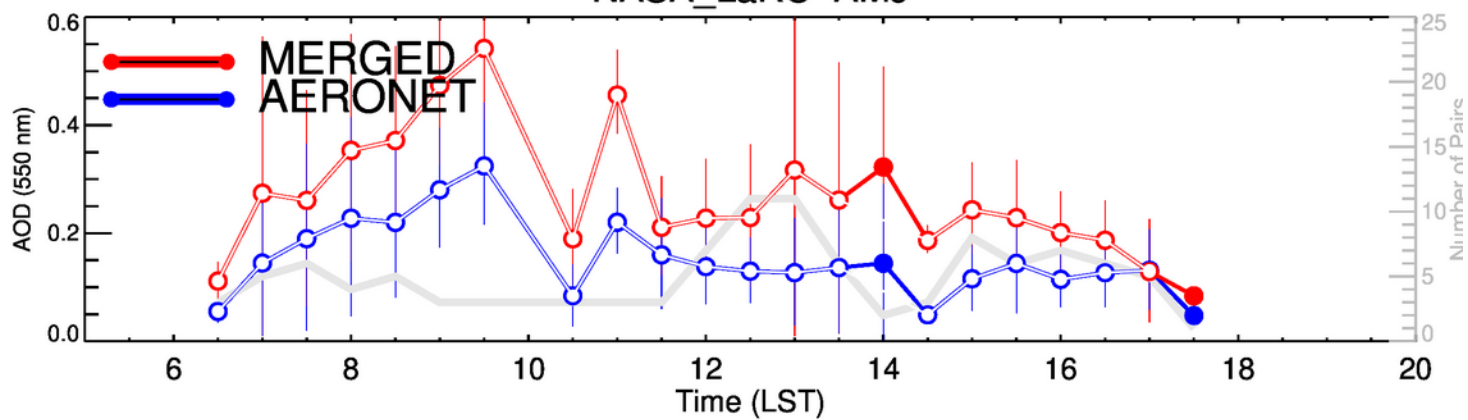

NASA\_LaRC-JAS

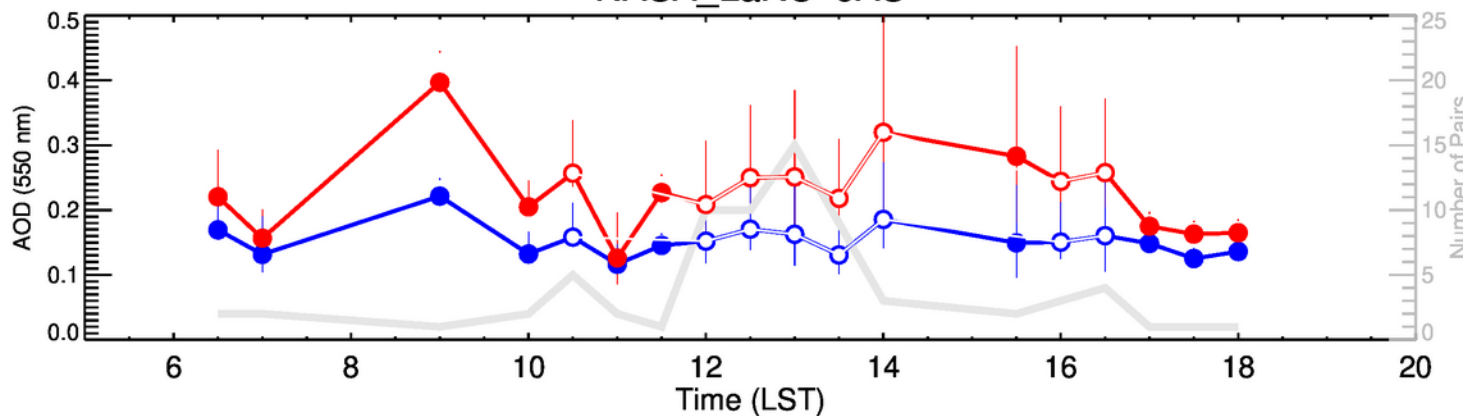

NASA\_LaRC-OND

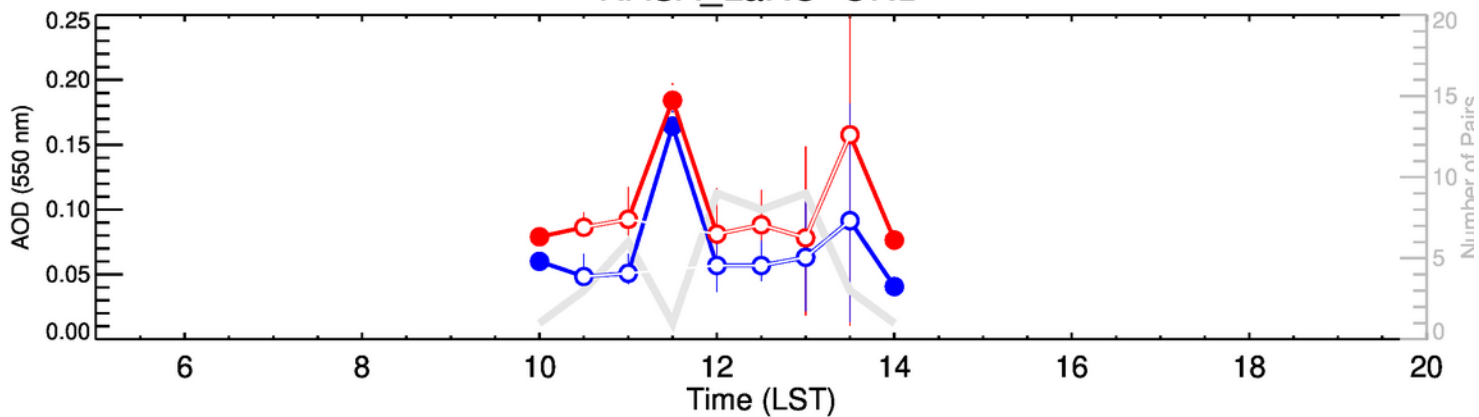

NASA\_LaRC-JFM

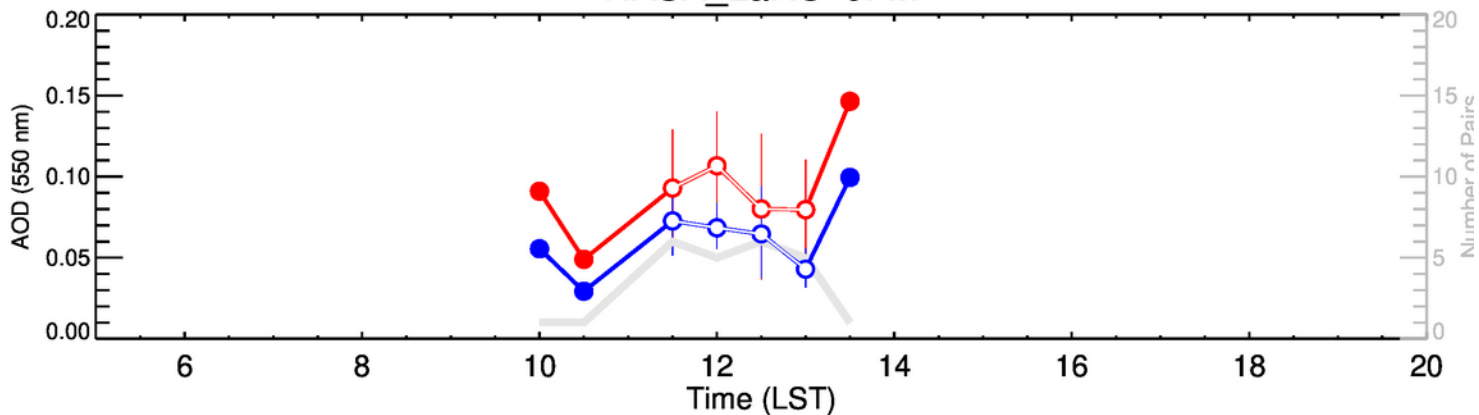

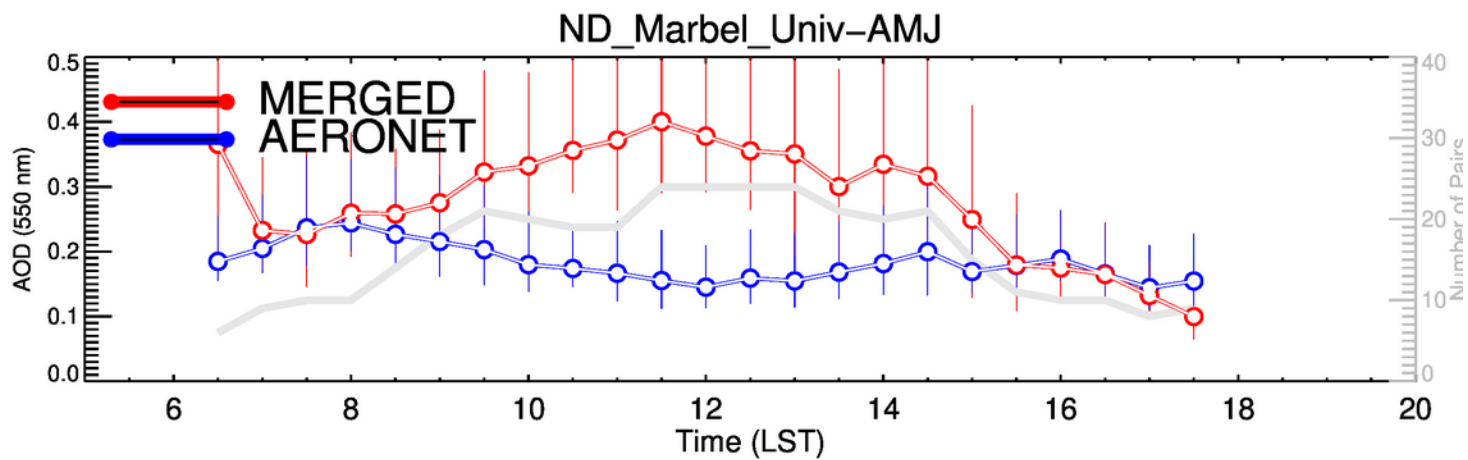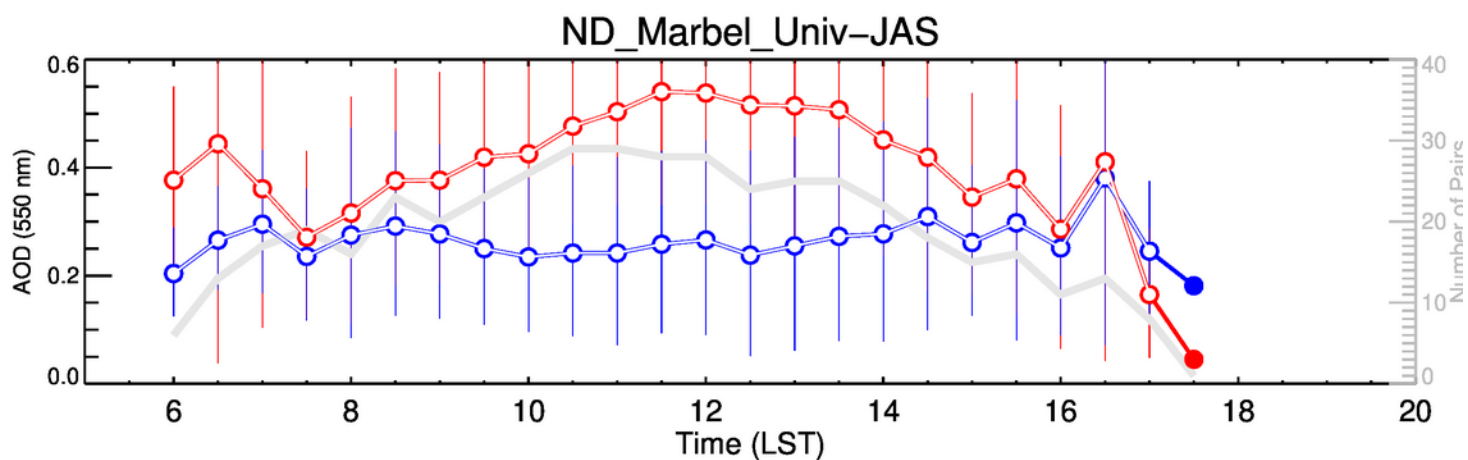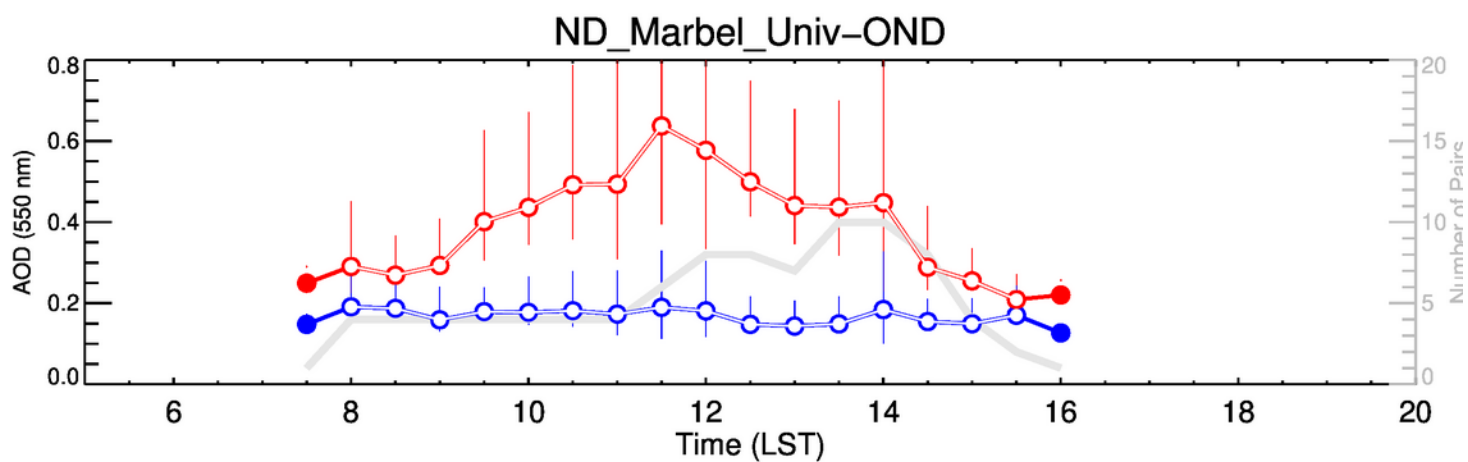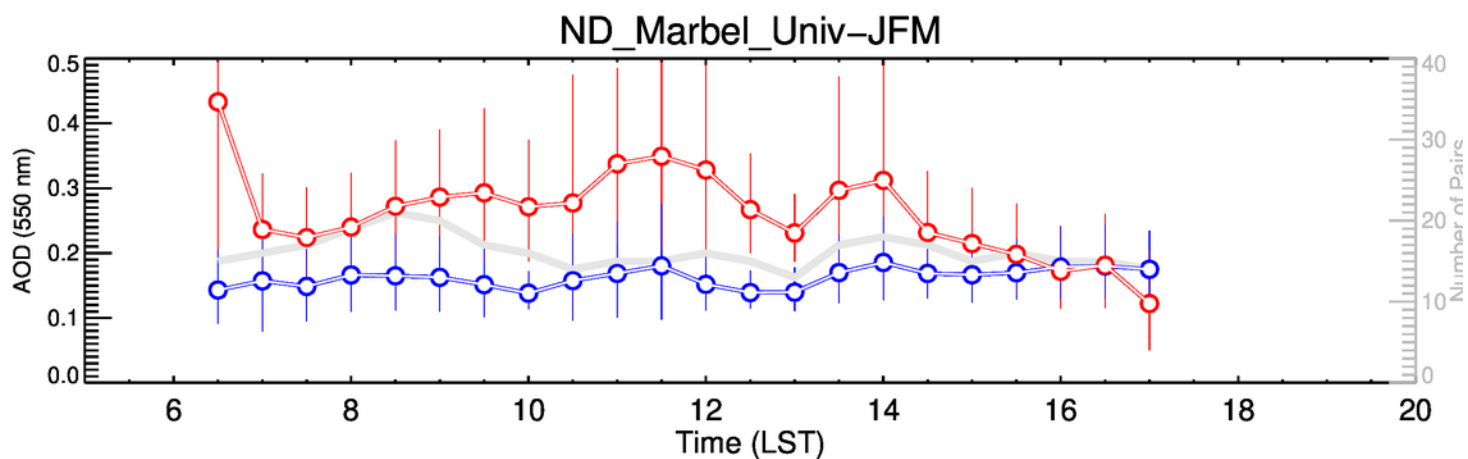

NEON\_CLBJ-AMJ

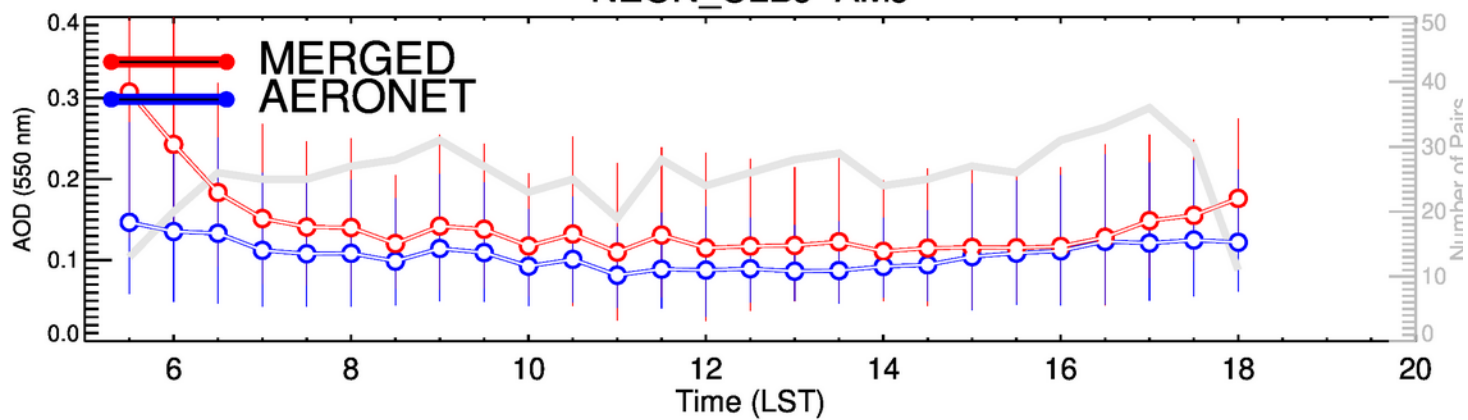

NEON\_CLBJ-JAS

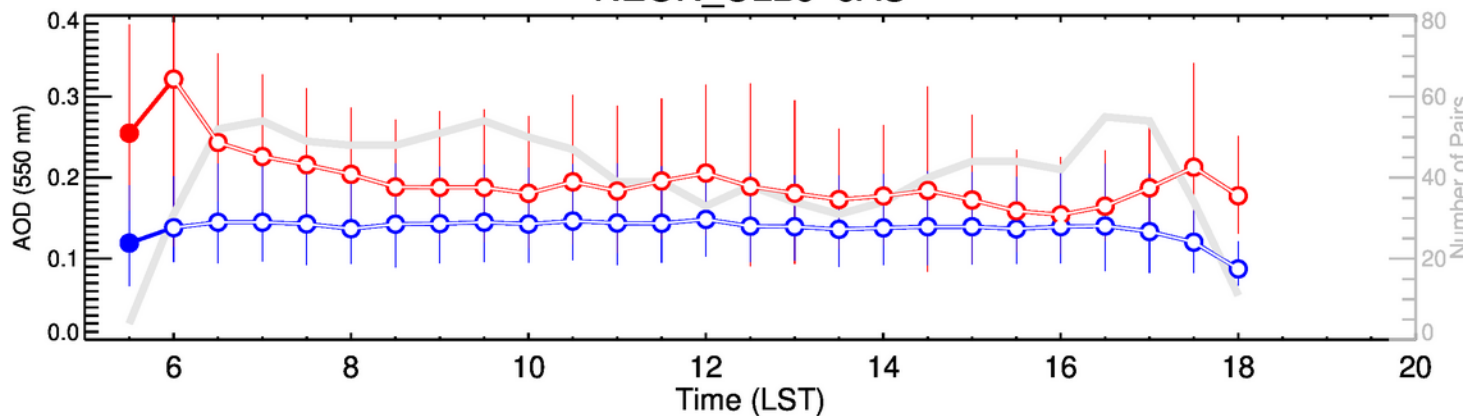

NEON\_CLBJ-OND

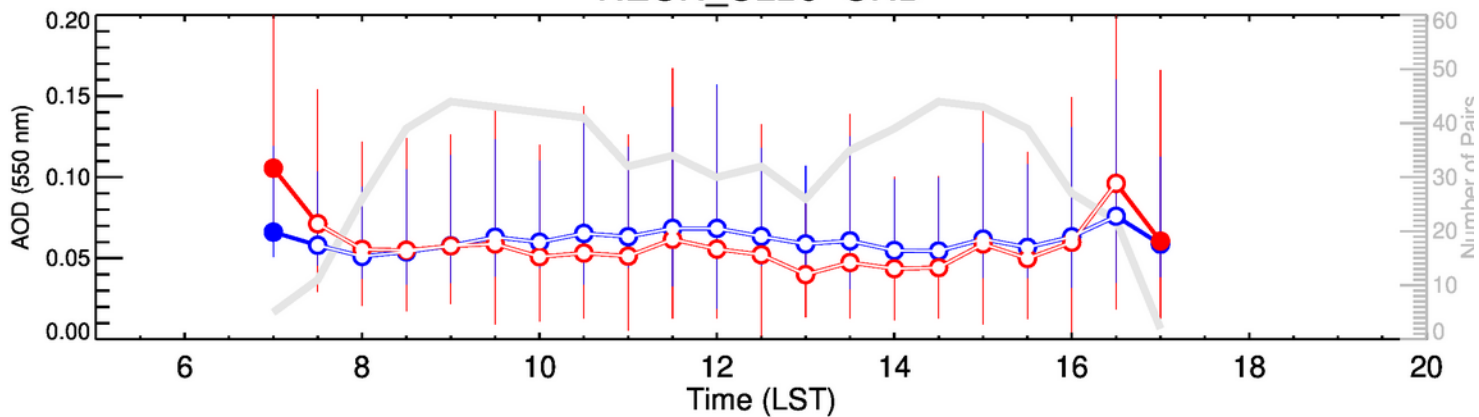

NEON\_CLBJ-JFM

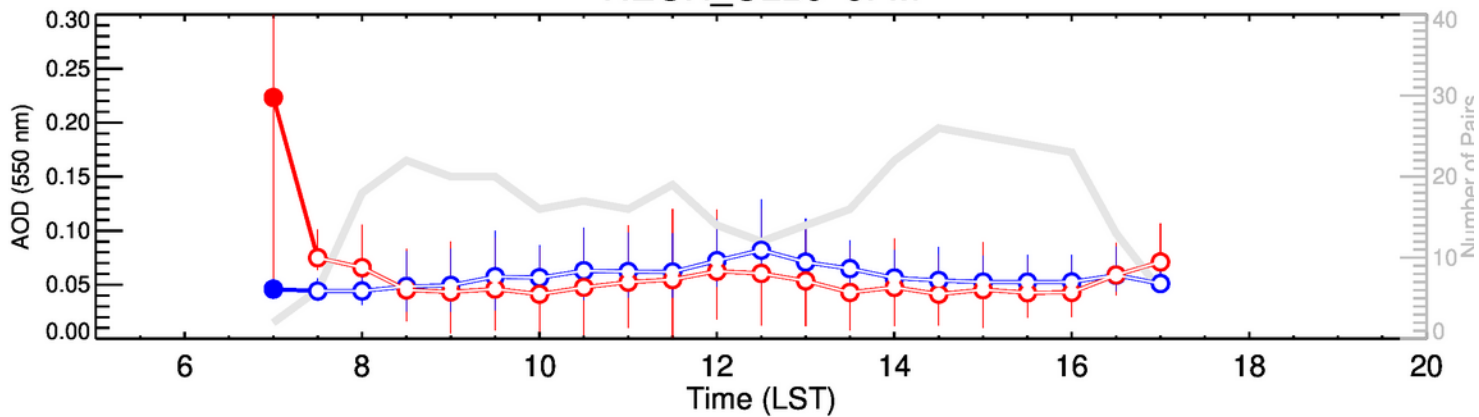

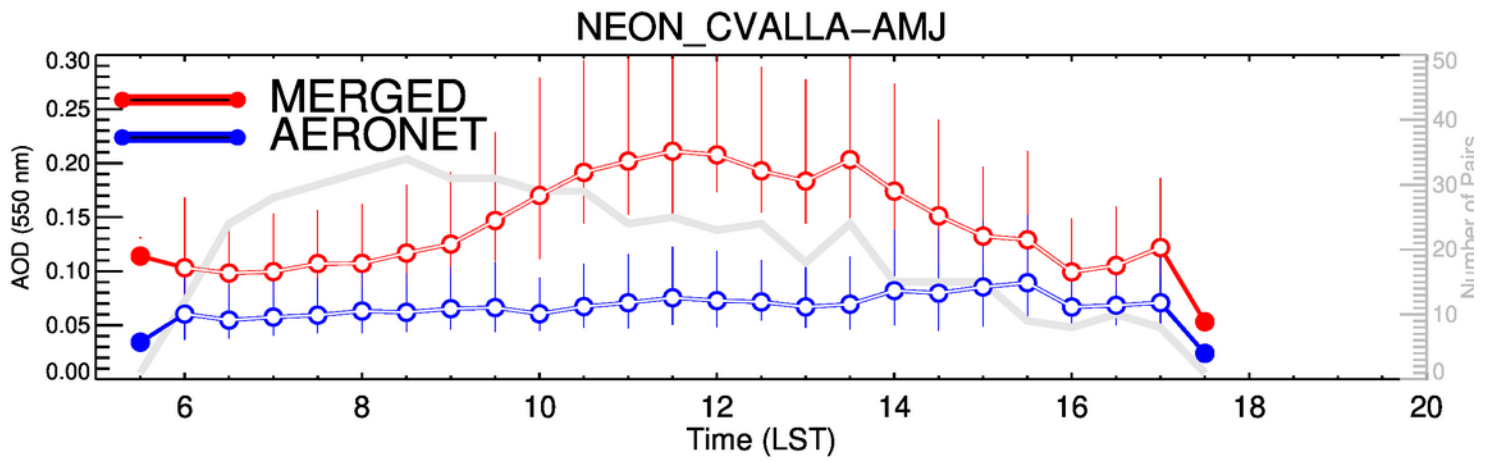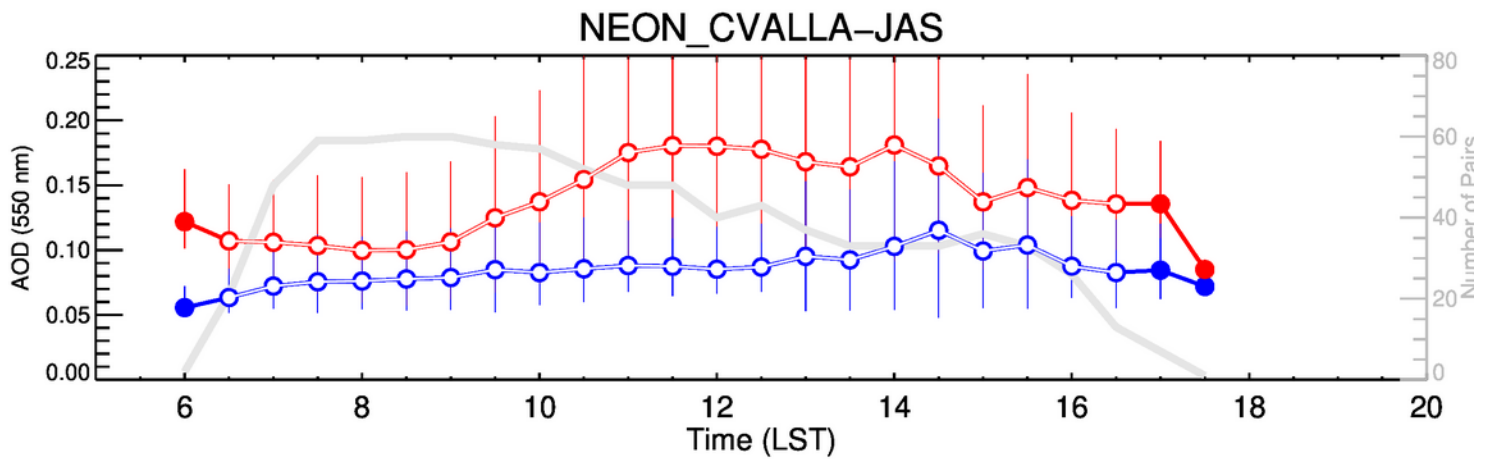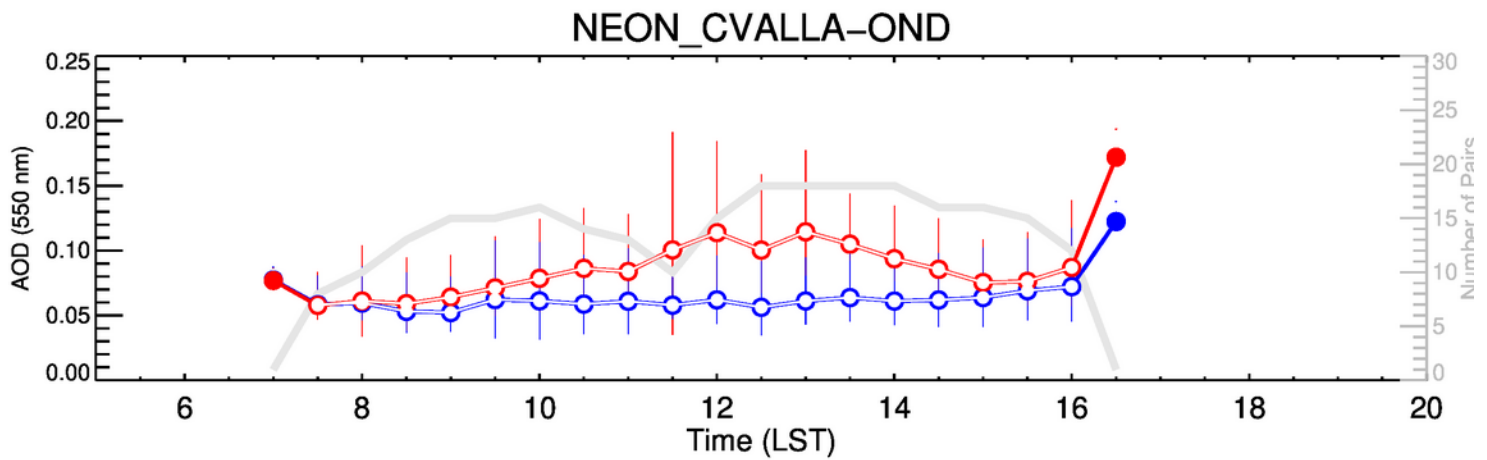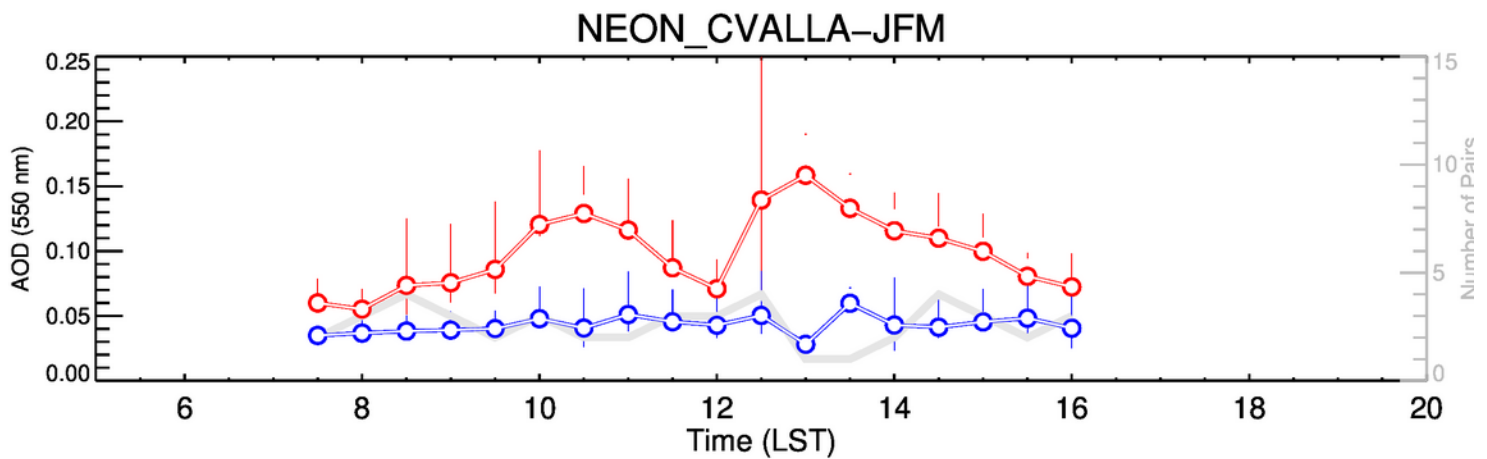

### NEON\_GRSM-AMJ

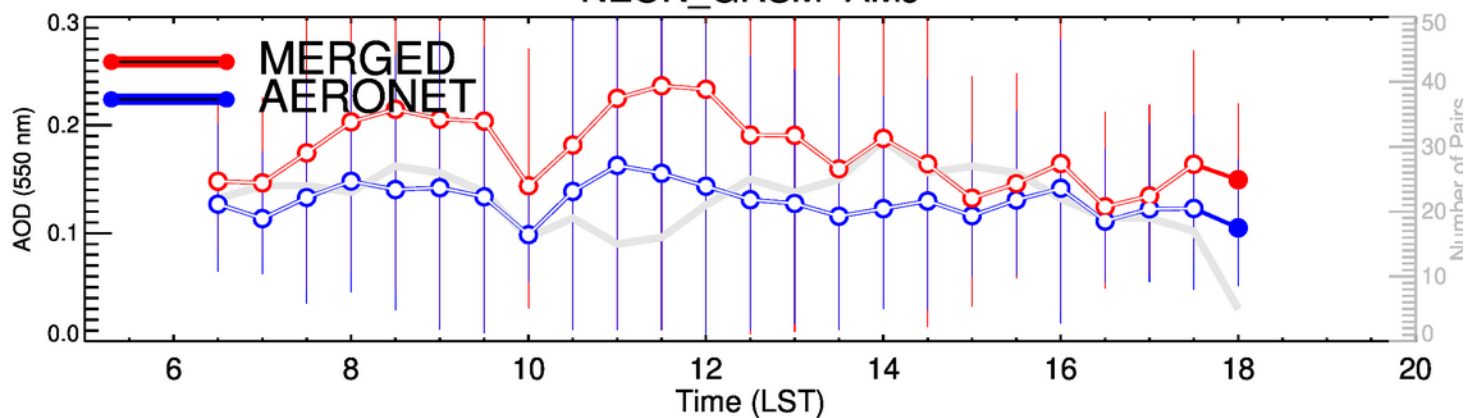

### NEON\_GRSM-JAS

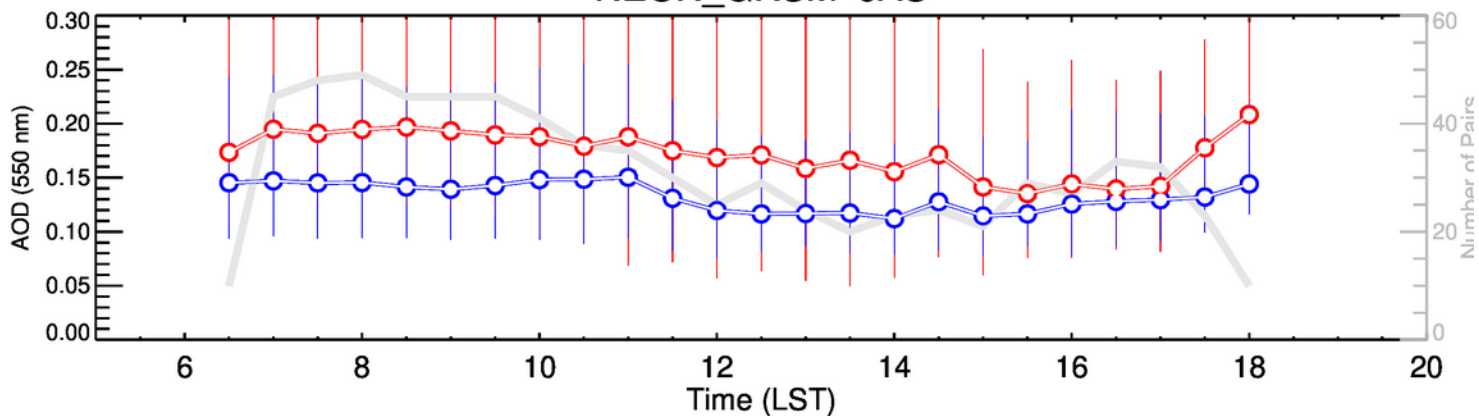

### NEON\_GRSM-OND

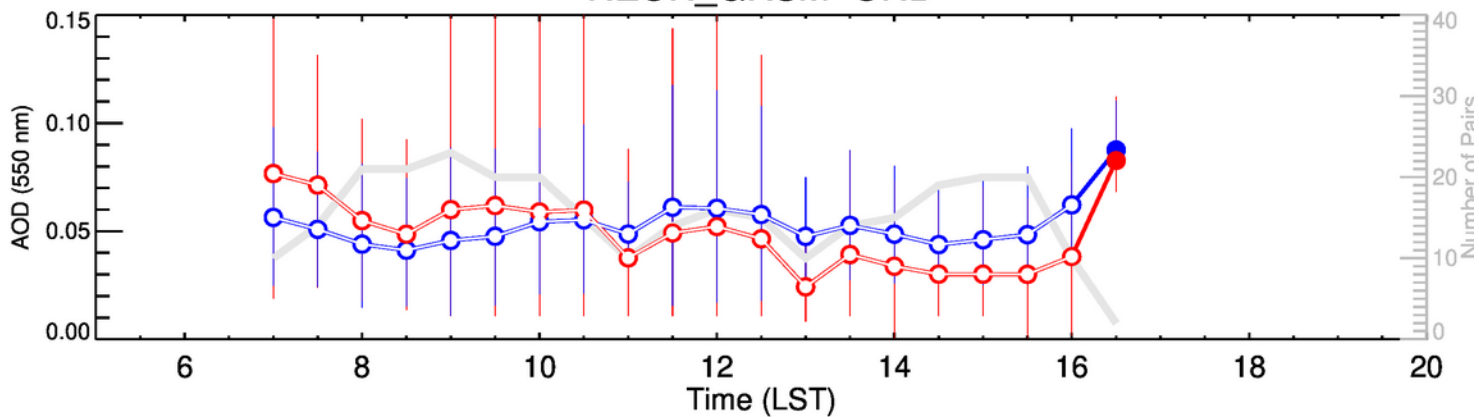

### NEON\_GRSM-JFM

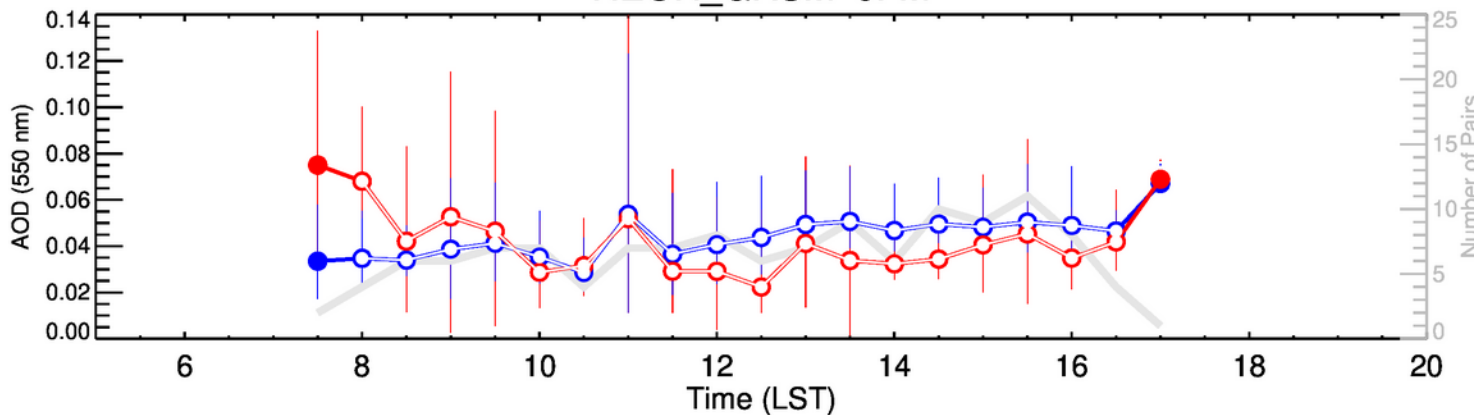

NEON\_GUAN-AMJ

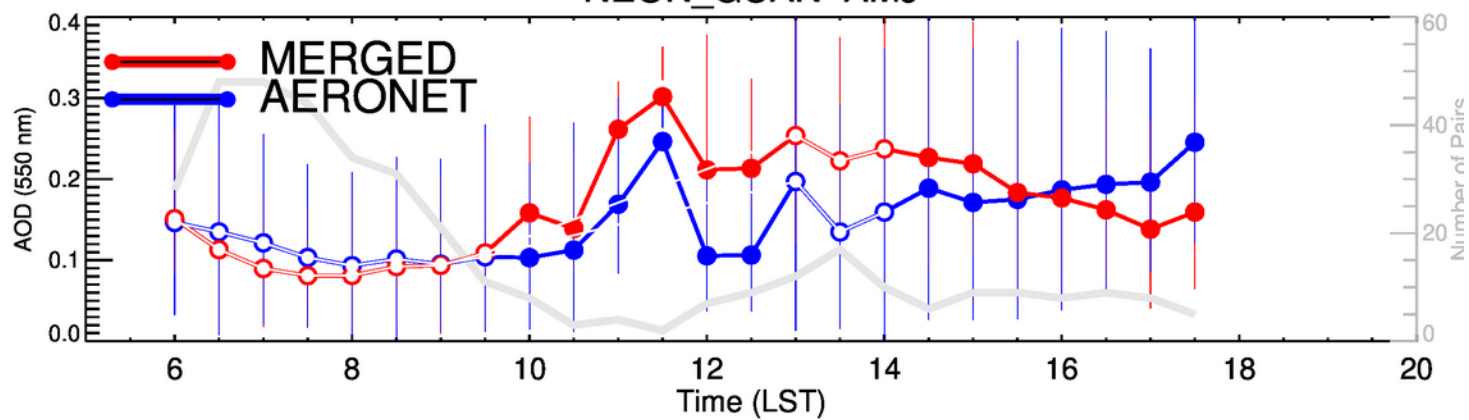

NEON\_GUAN-JAS

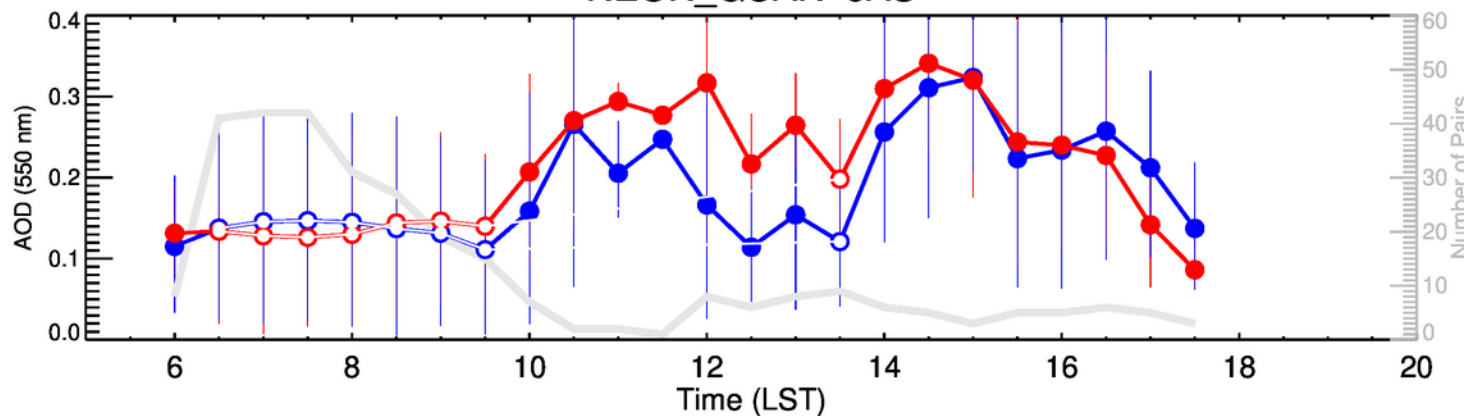

NEON\_GUAN-OND

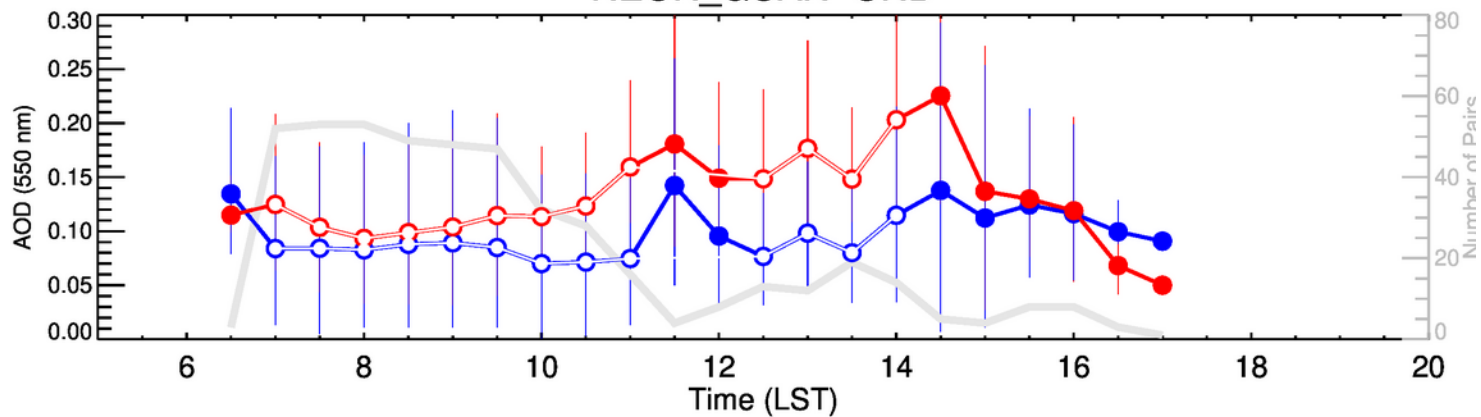

NEON\_GUAN-JFM

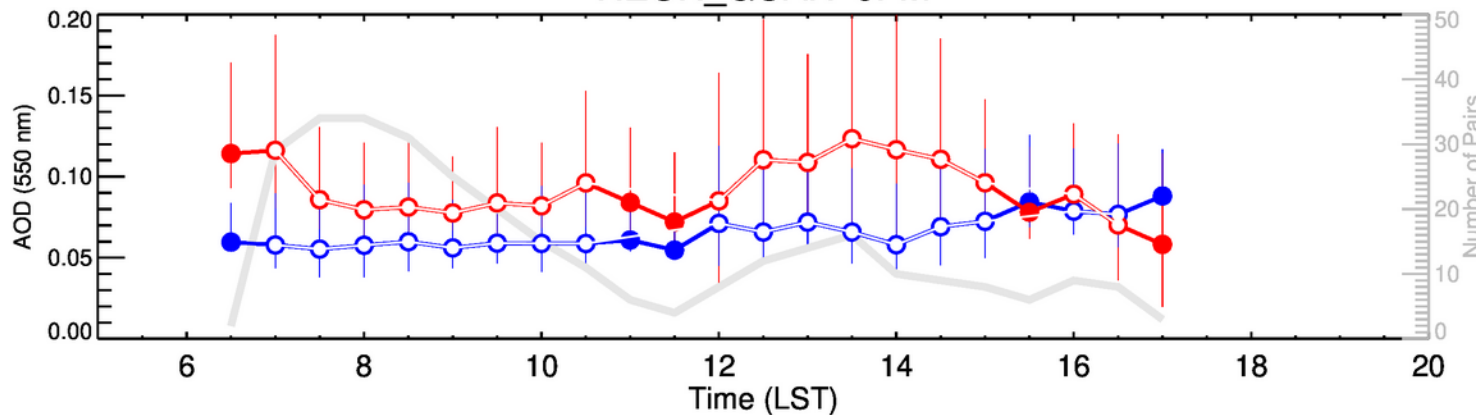

### NEON\_Harvard-AMJ

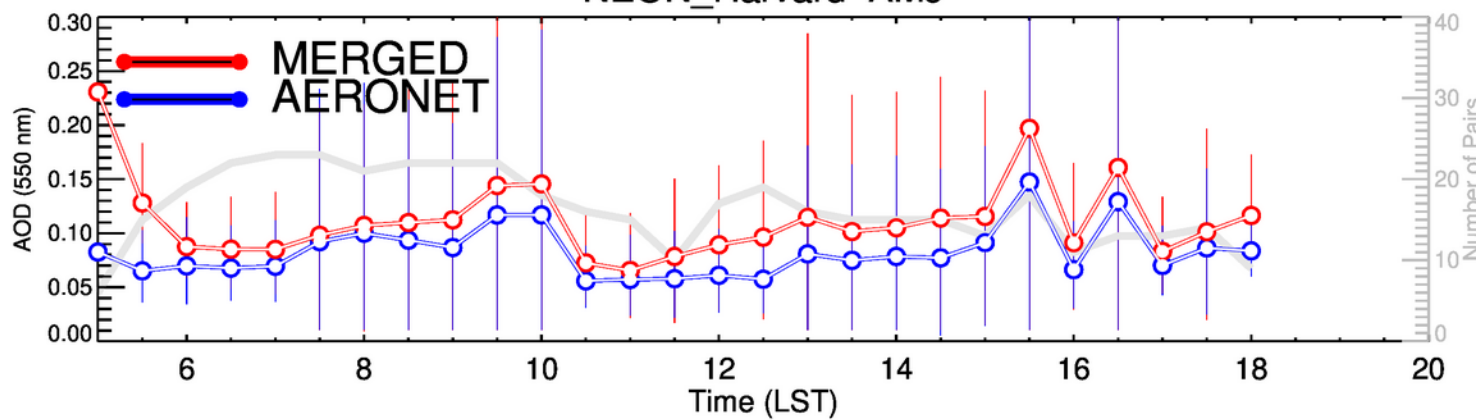

### NEON\_Harvard-JAS

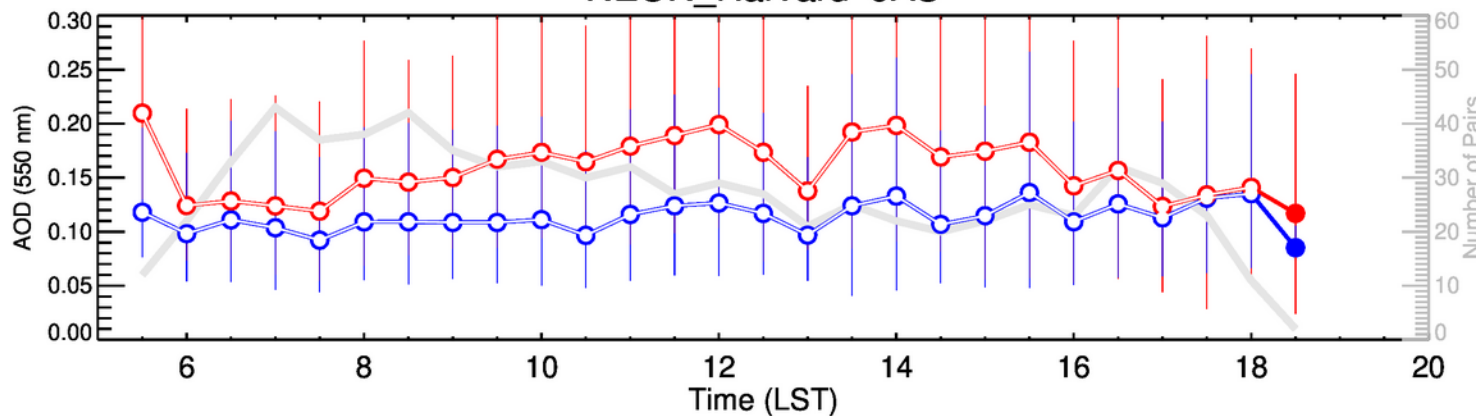

### NEON\_Harvard-OND

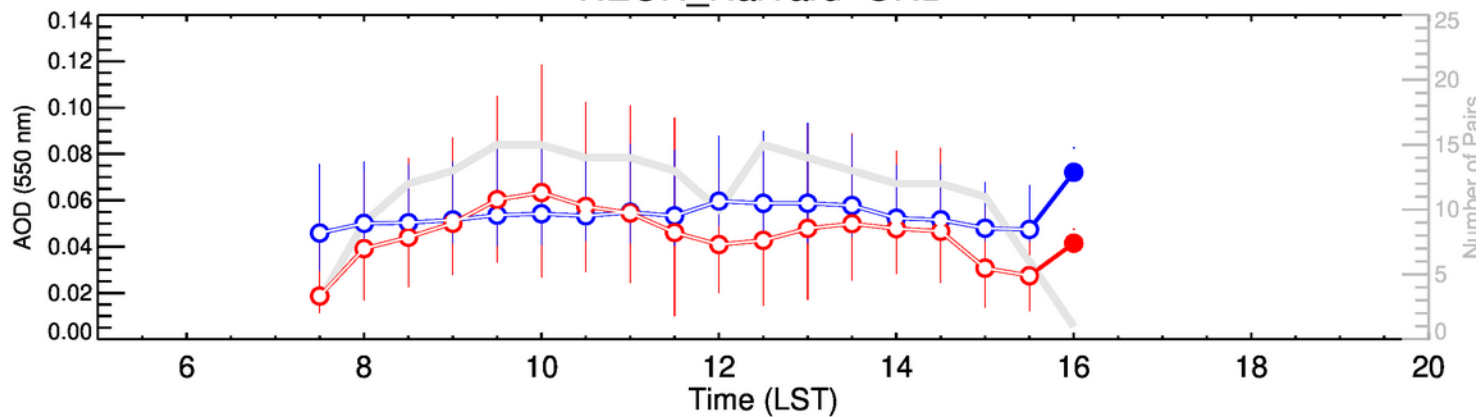

### NEON\_Harvard-JFM

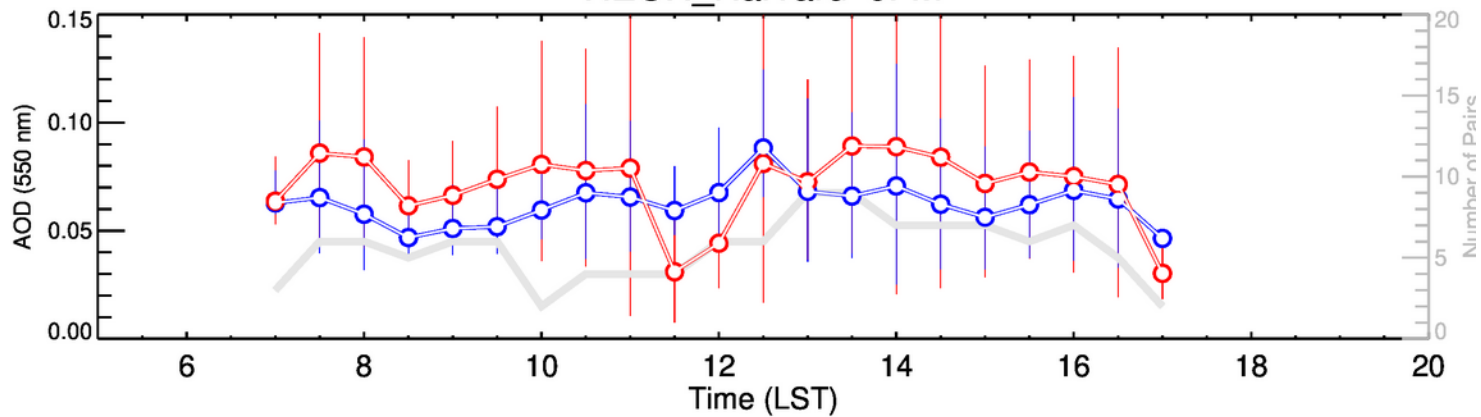



### NEON\_KONZ-AMJ

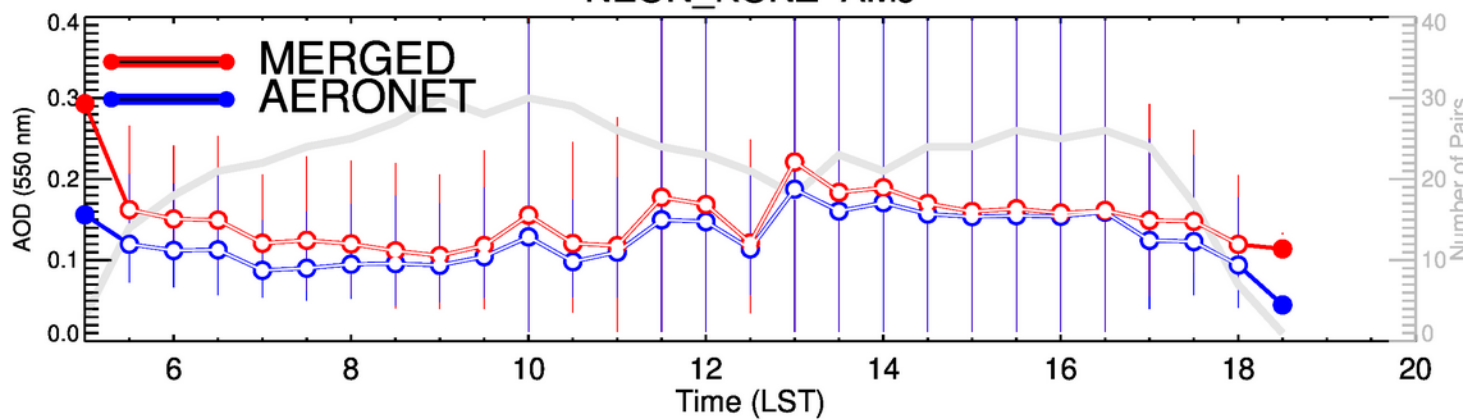

### NEON\_KONZ-JAS

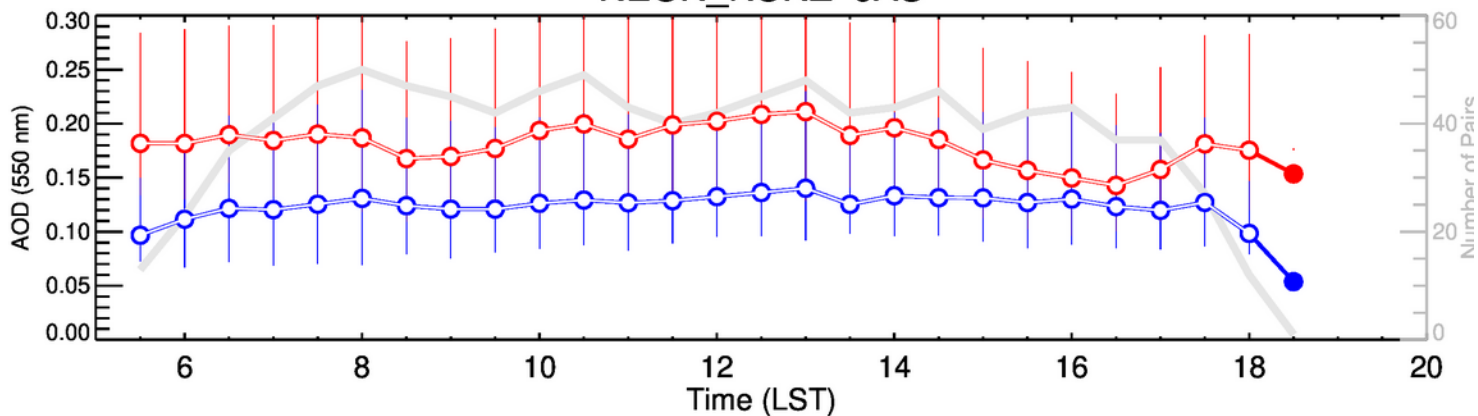

### NEON\_KONZ-OND

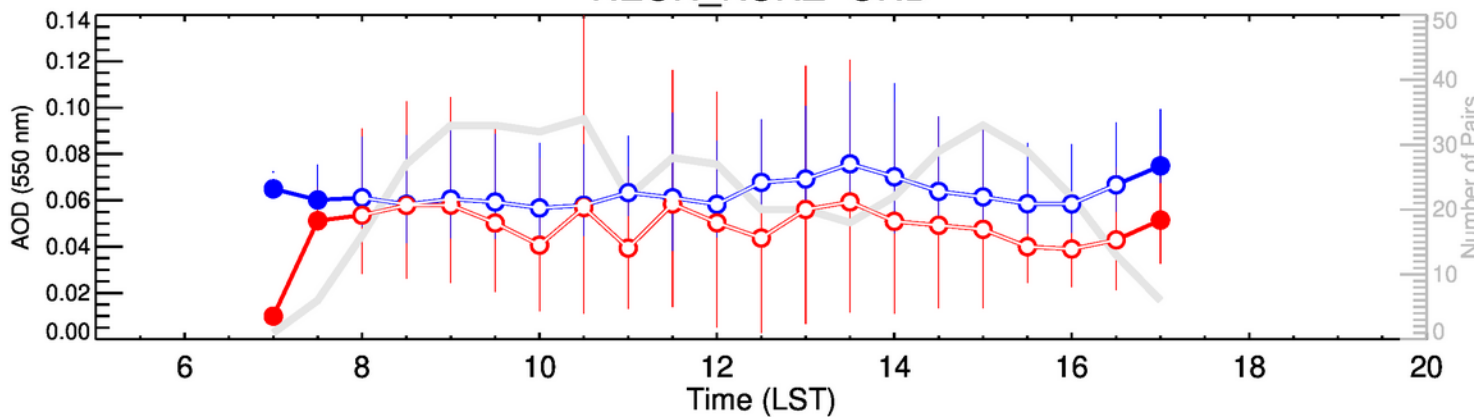

### NEON\_KONZ-JFM

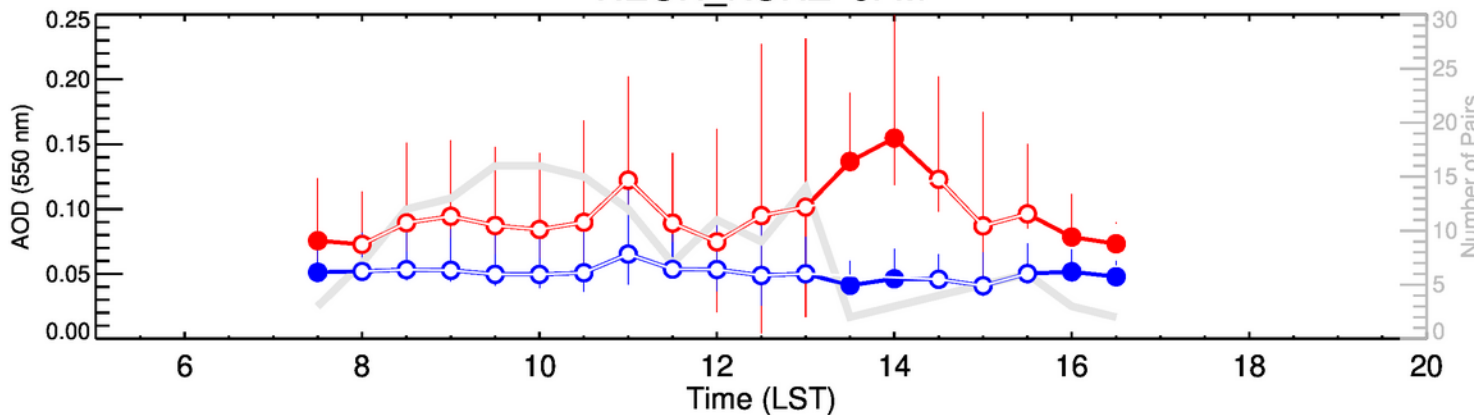

### NEON\_MLBS-AMJ

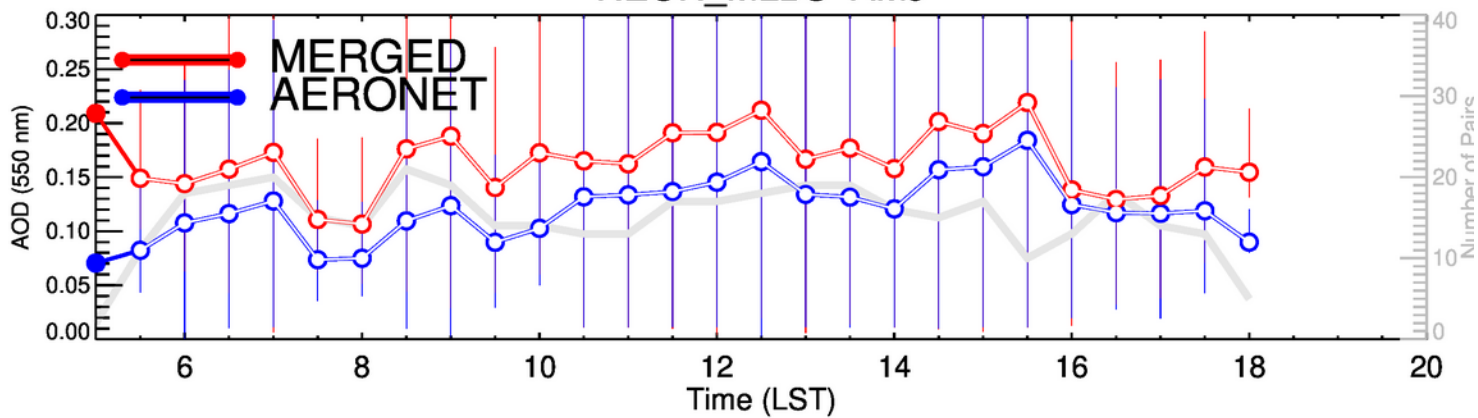

### NEON\_MLBS-JAS

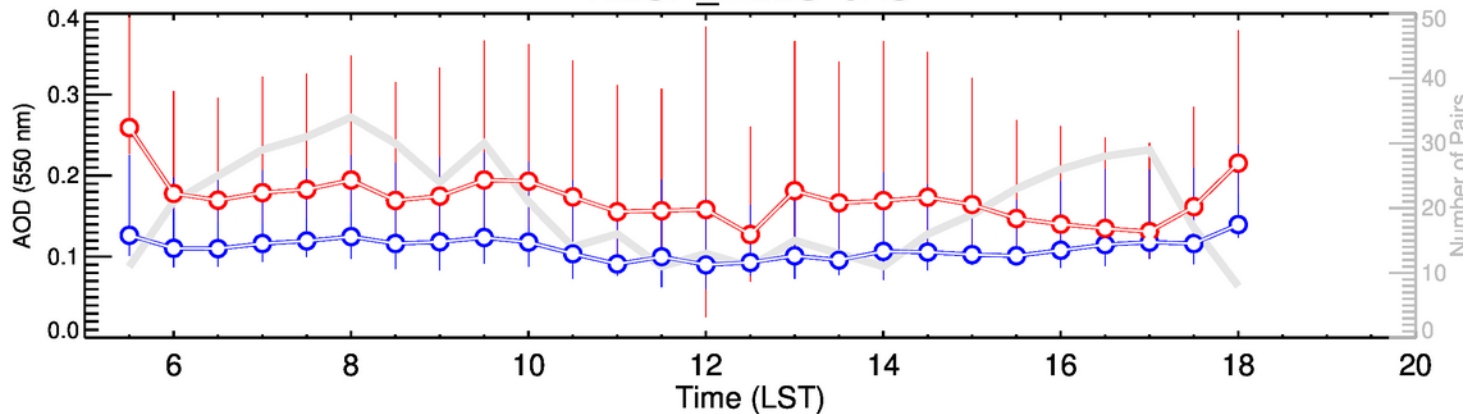

### NEON\_MLBS-OND

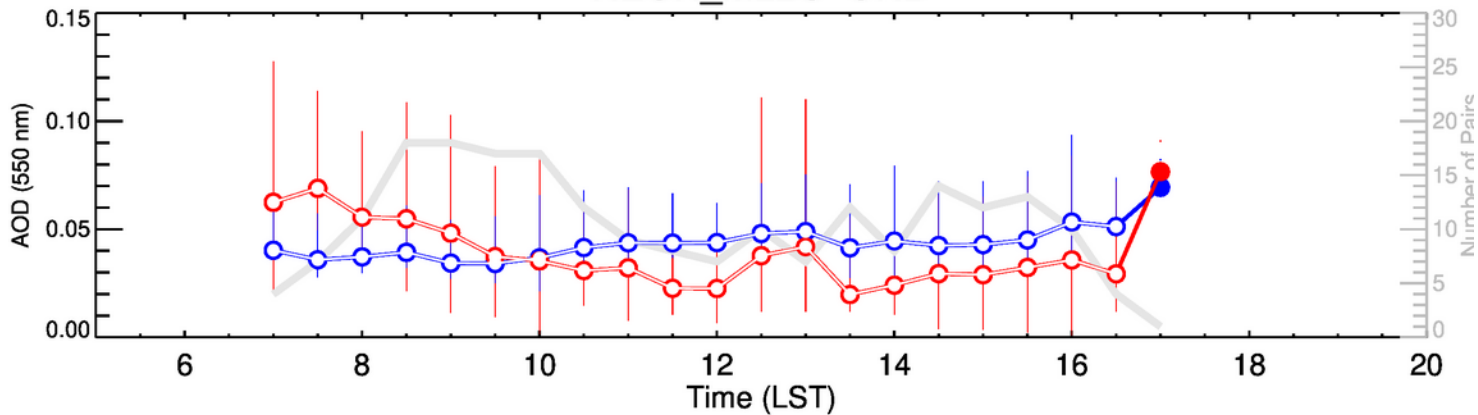

### NEON\_MLBS-JFM

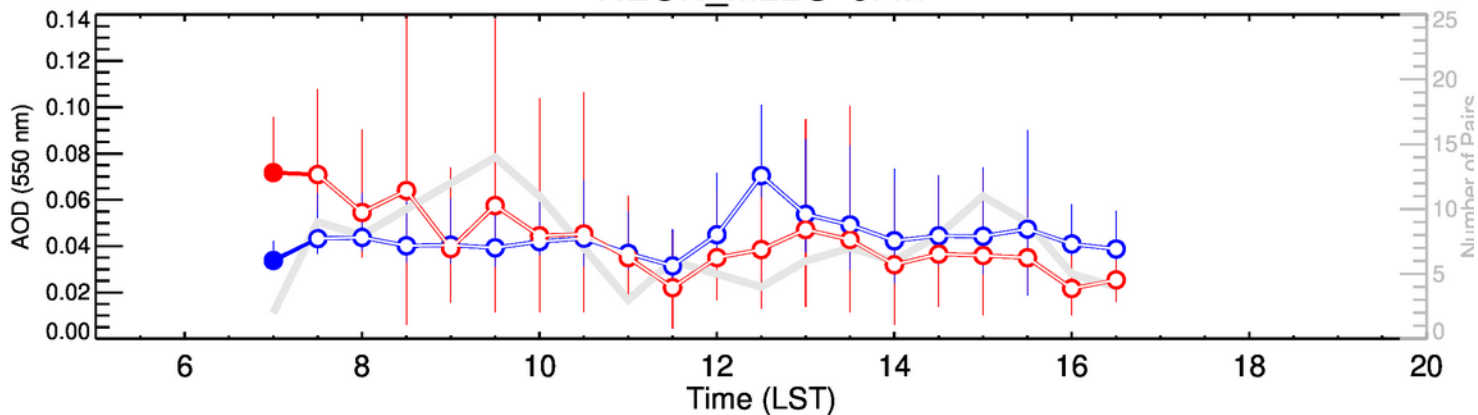

NEON\_OAES-AMJ

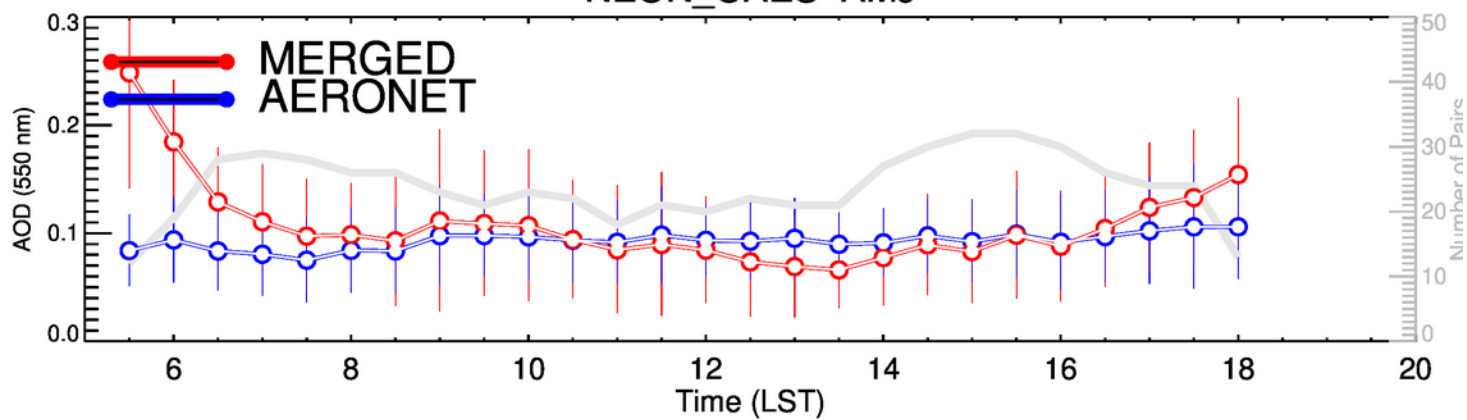

NEON\_OAES-JAS

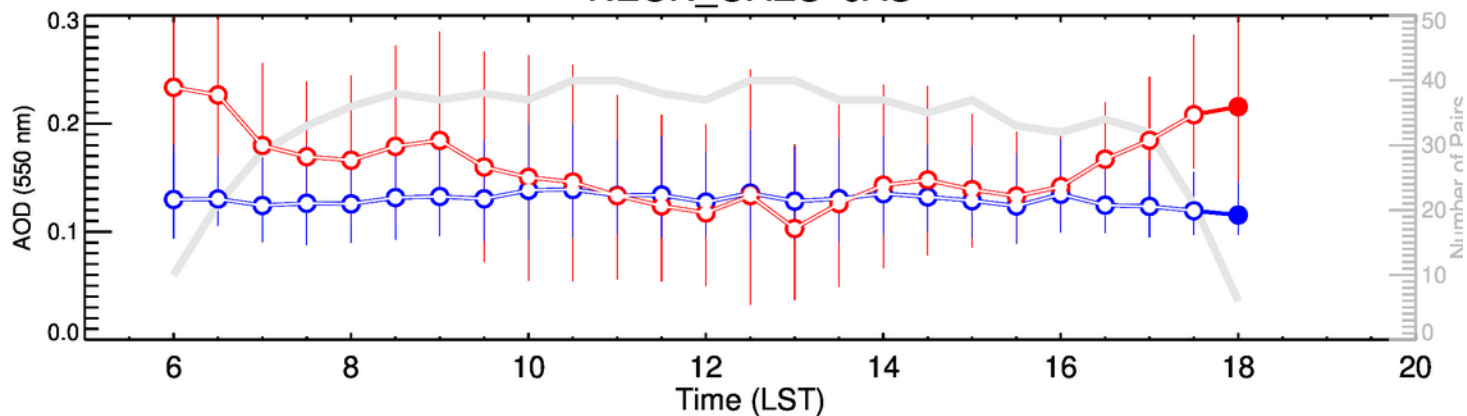

NEON\_OAES-OND

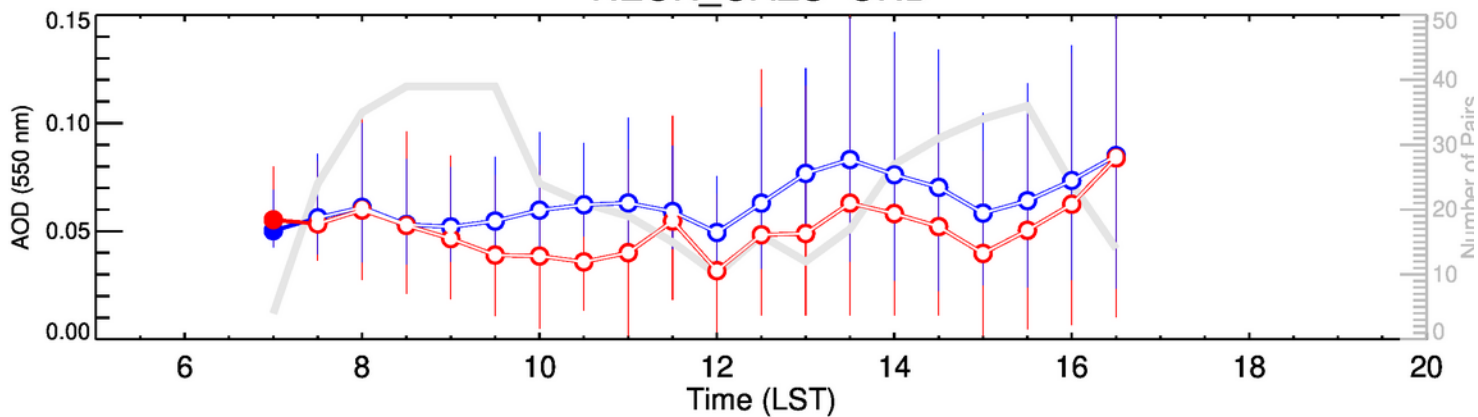

NEON\_OAES-JFM

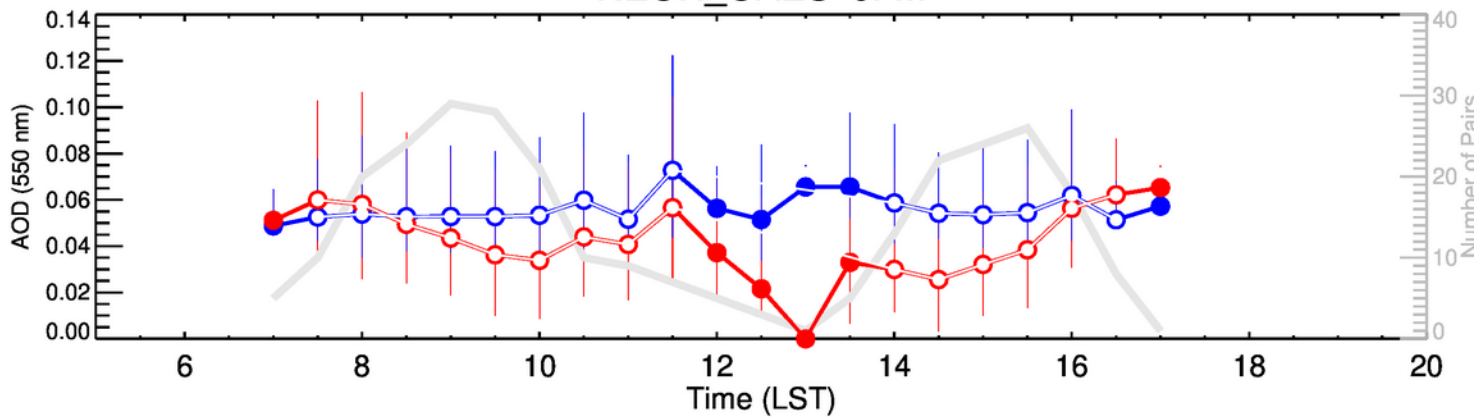

NEON\_ONAQ-AMJ

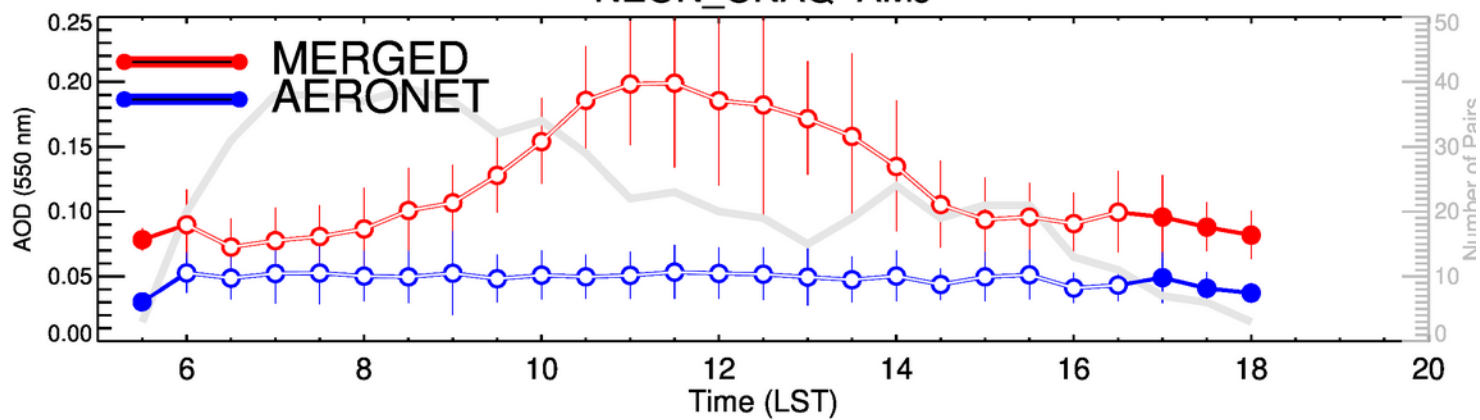

NEON\_ONAQ-JAS

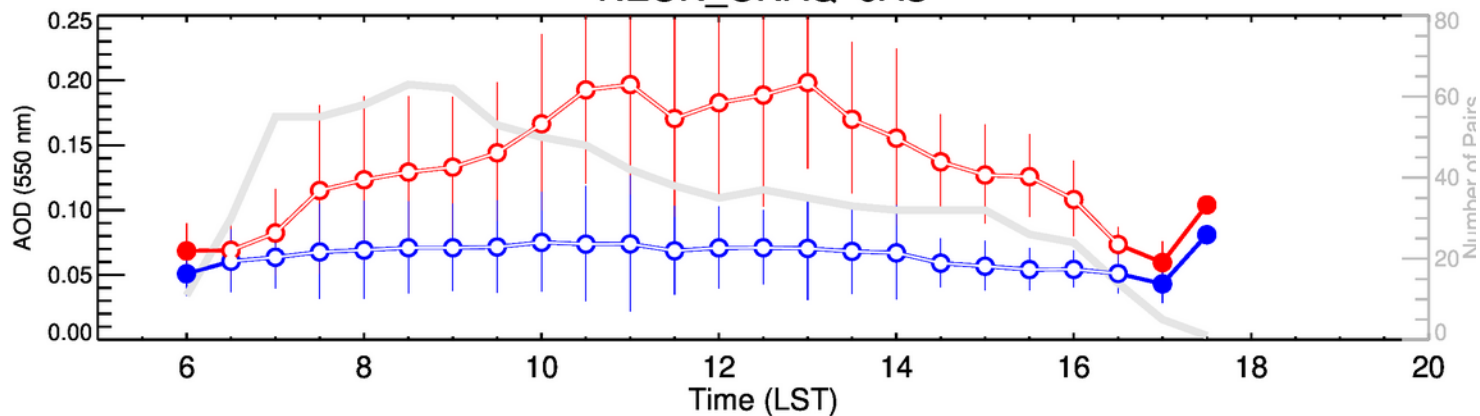

NEON\_ONAQ-OND

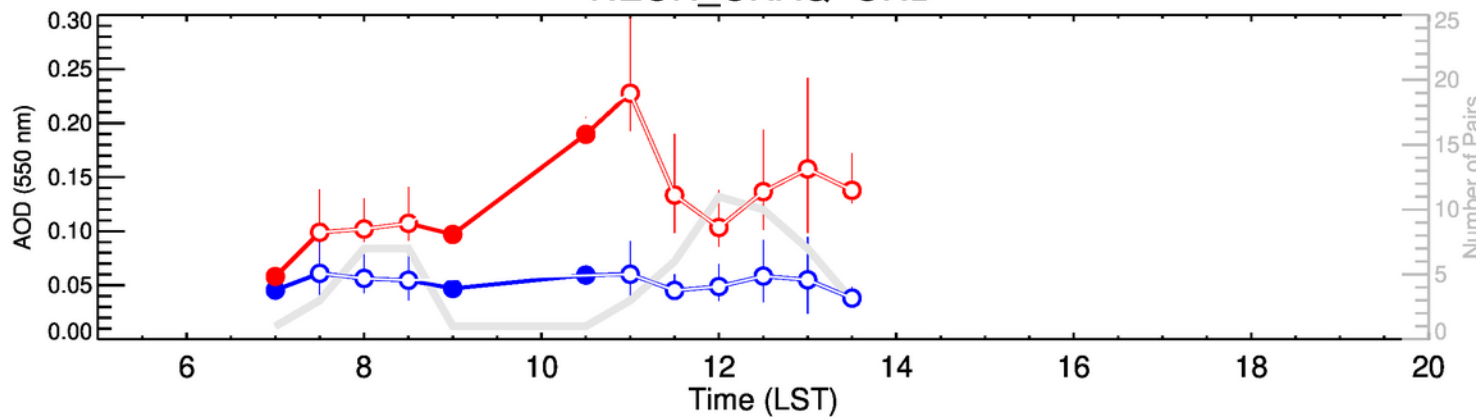

NEON\_ONAQ-JFM

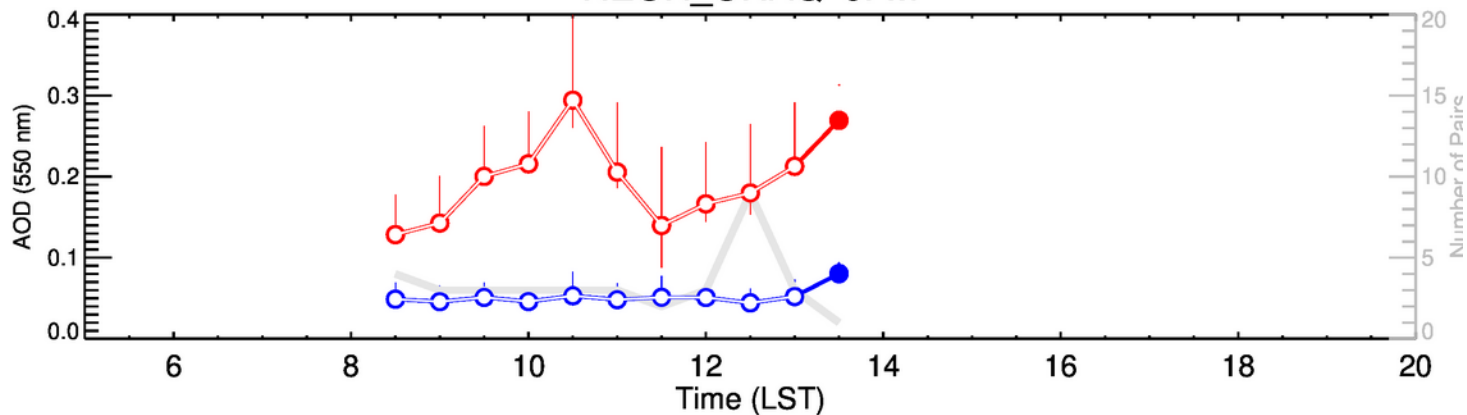

### NEON\_ORNL-AMJ

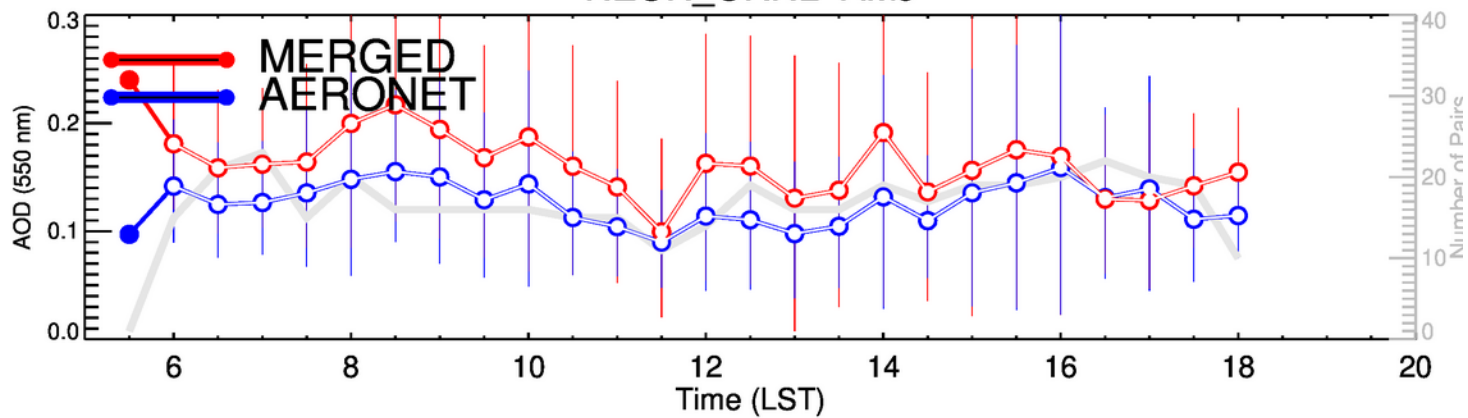

### NEON\_ORNL-JAS

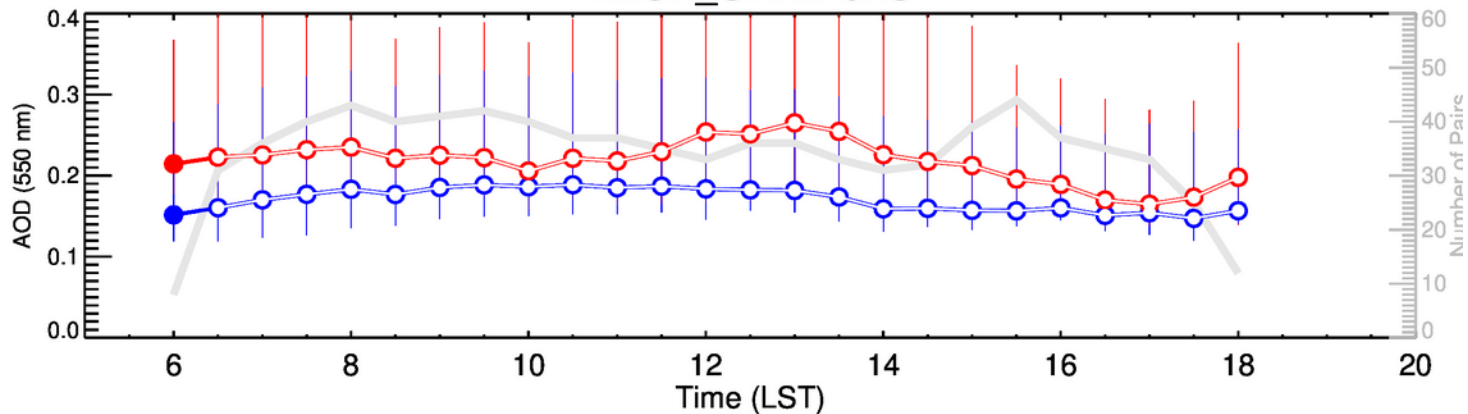

### NEON\_ORNL-OND

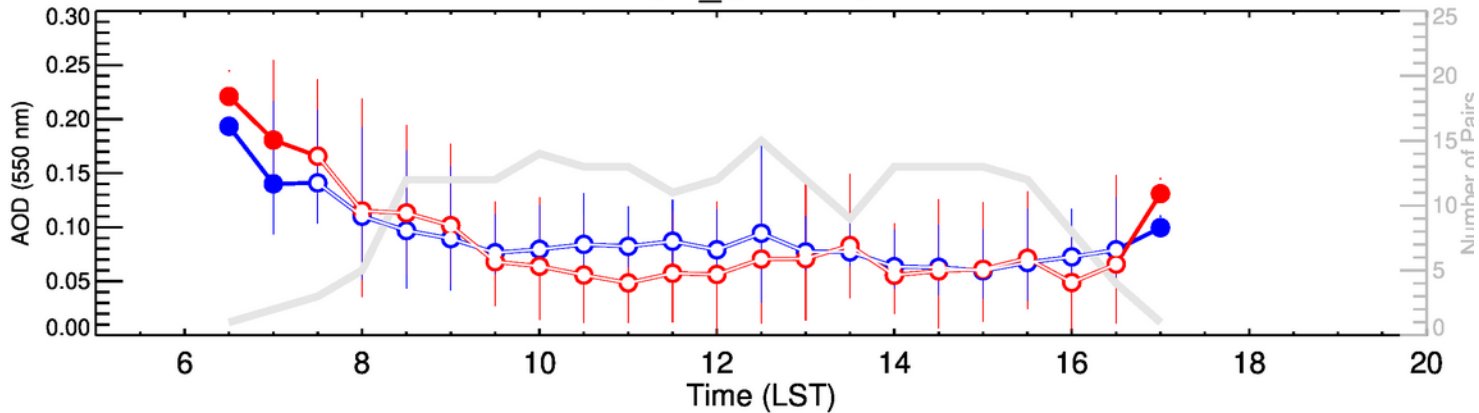

### NEON\_ORNL-JFM

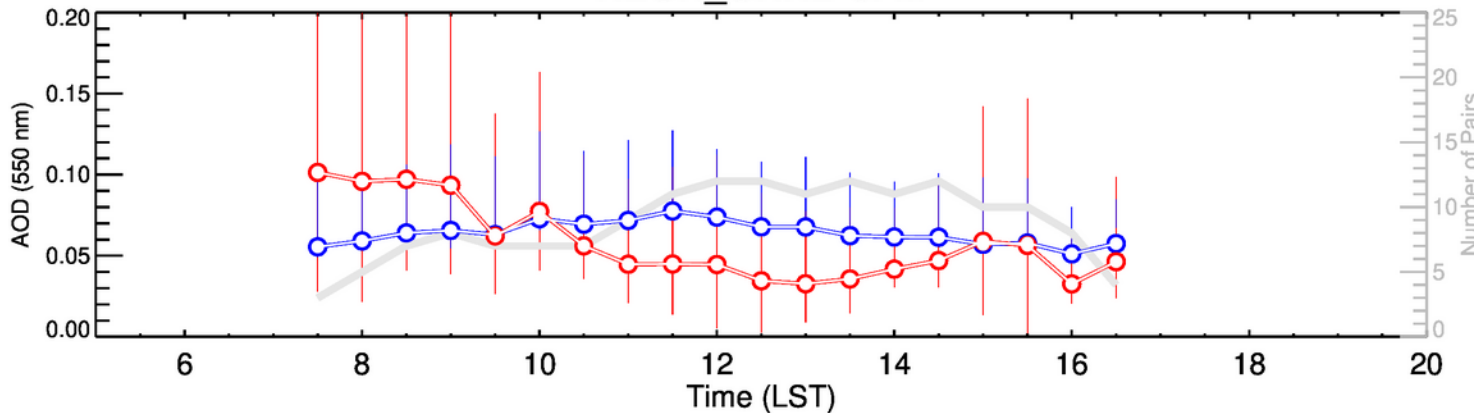

NEON\_OSBS-AMJ

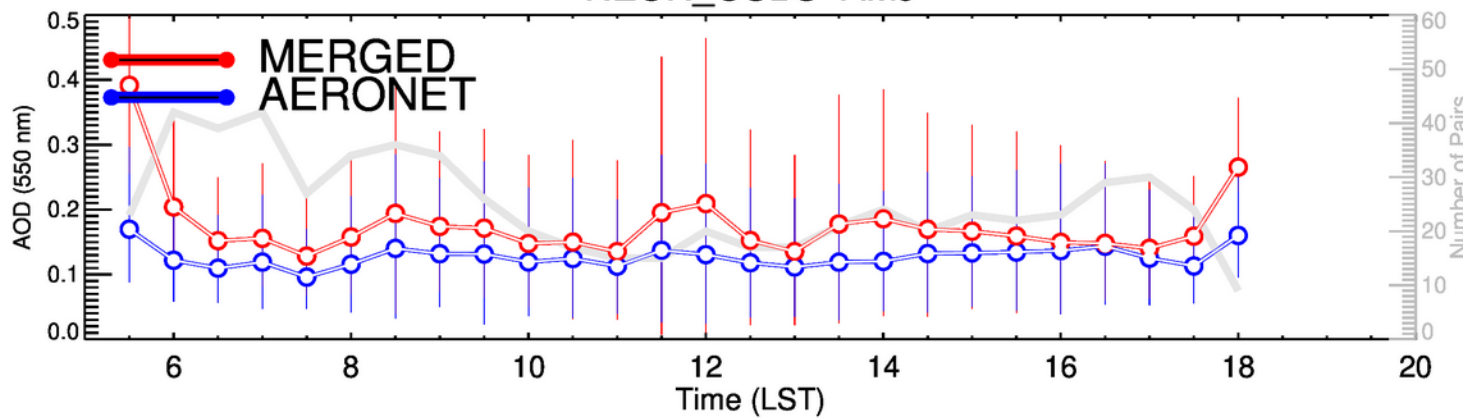

NEON\_OSBS-JAS

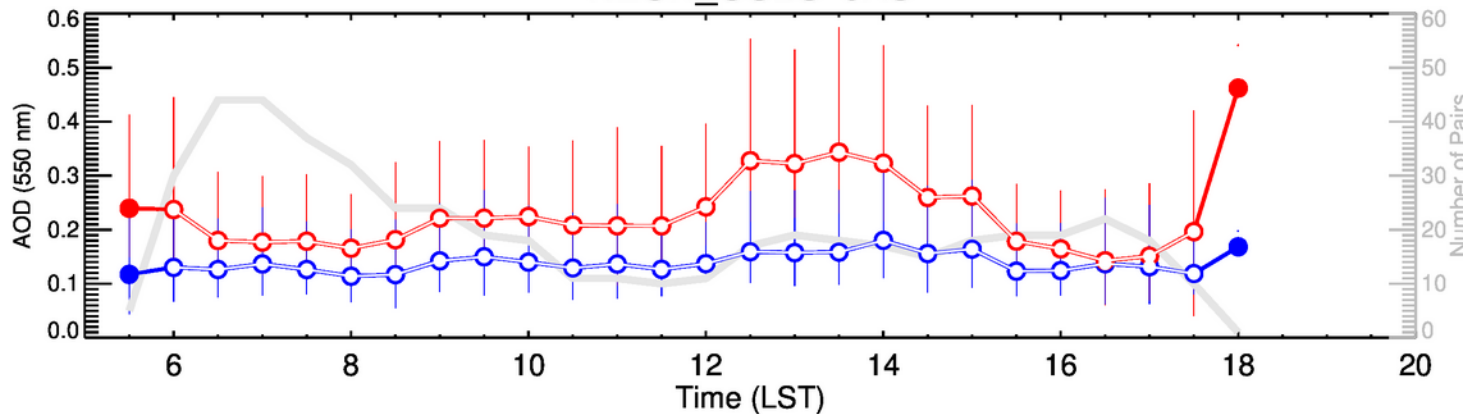

NEON\_OSBS-OND

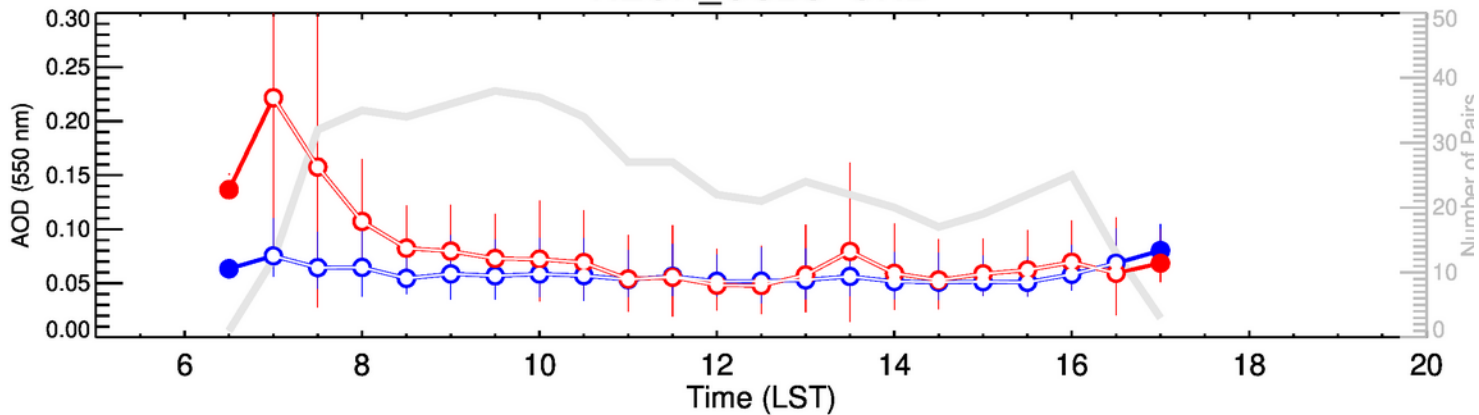

NEON\_OSBS-JFM

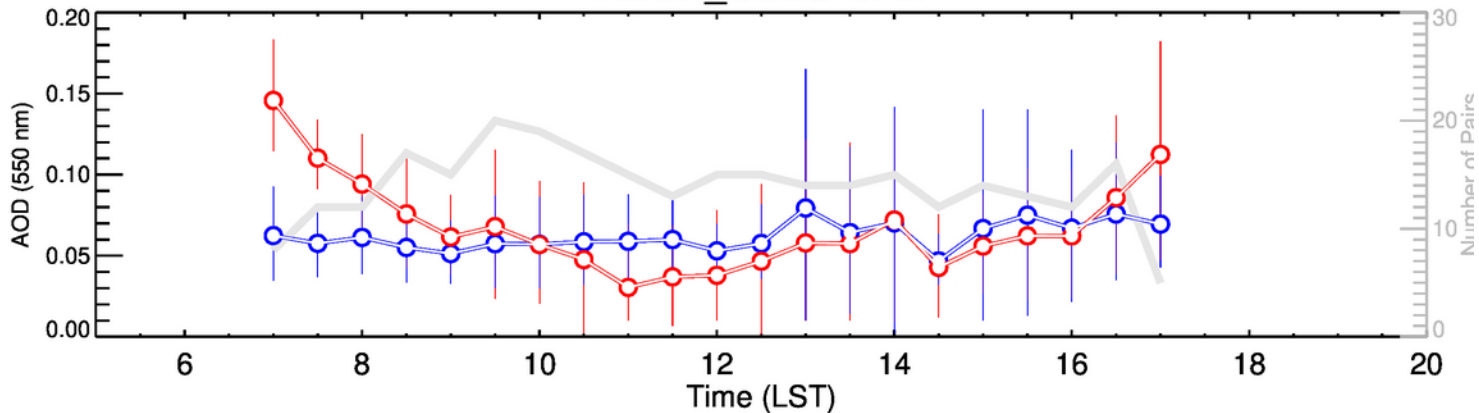

### NEON\_SERC-AMJ

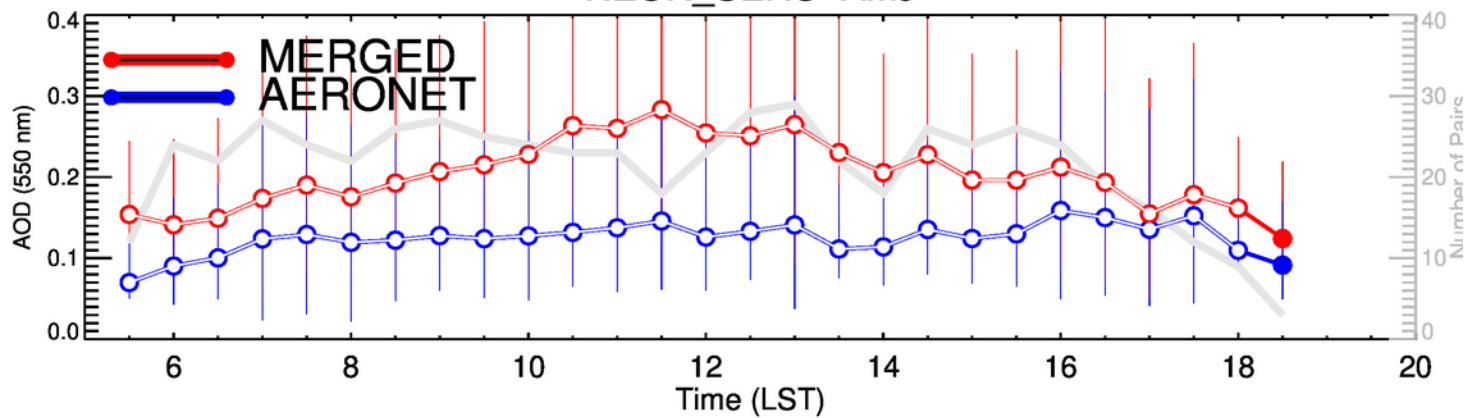

### NEON\_SERC-JAS

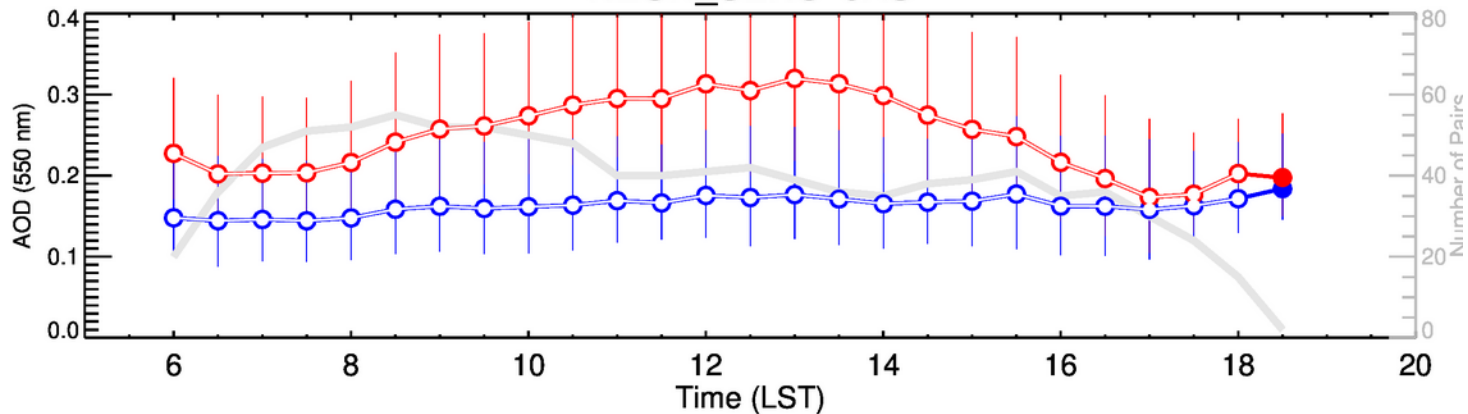

### NEON\_SERC-OND

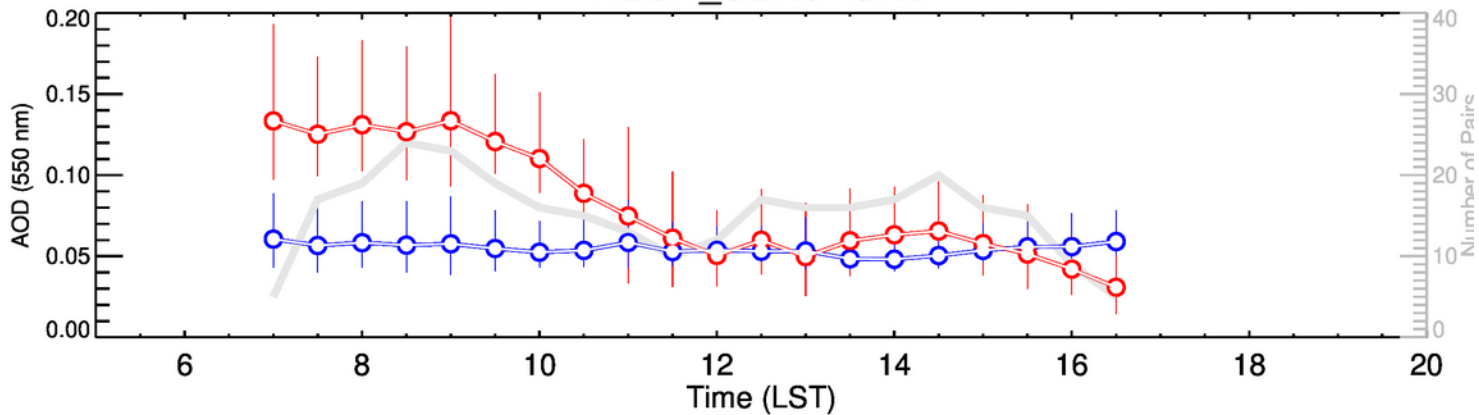

### NEON\_SERC-JFM

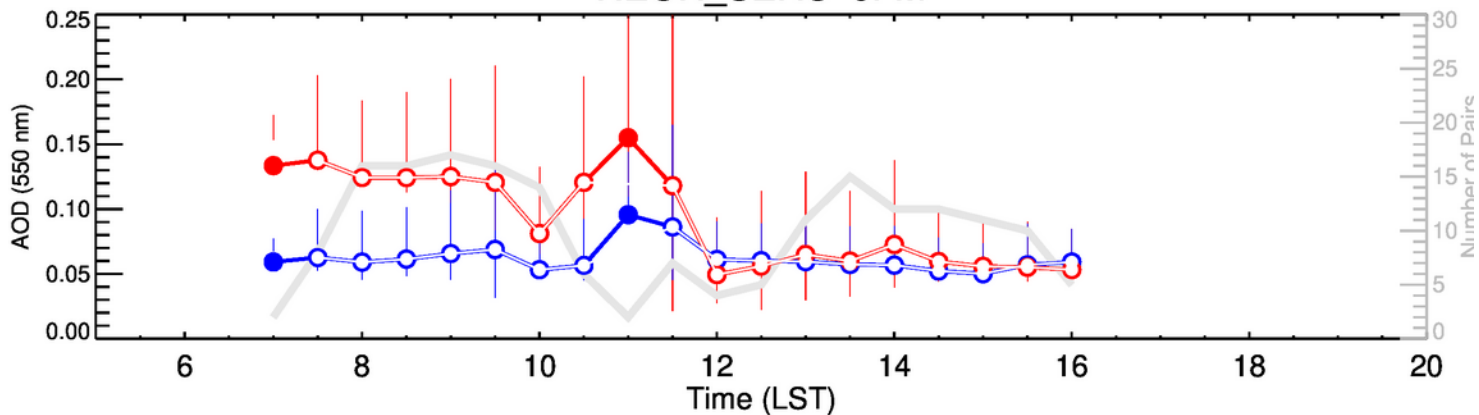

### NEON\_SJER-AMJ

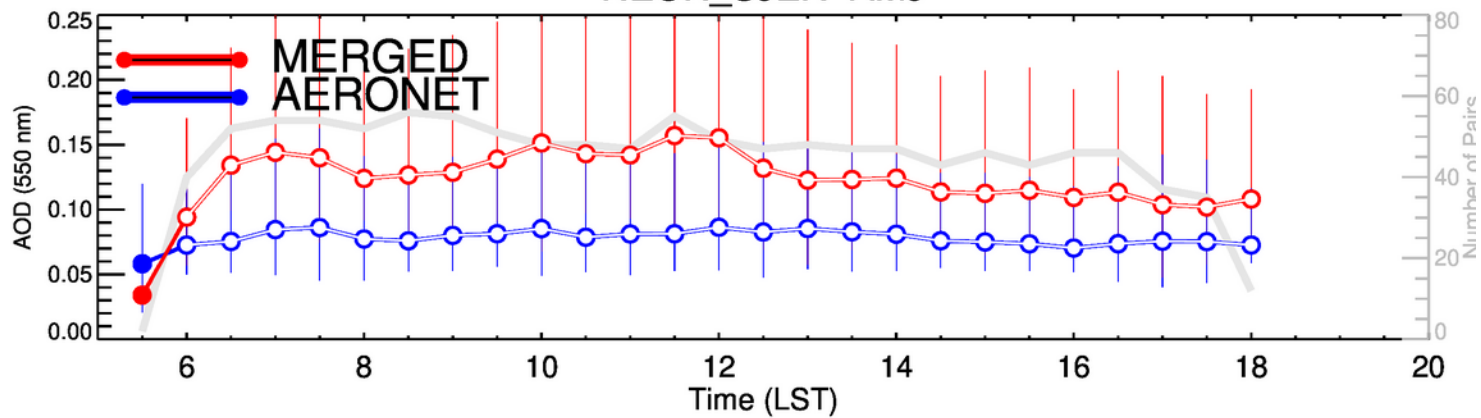

### NEON\_SJER-JAS

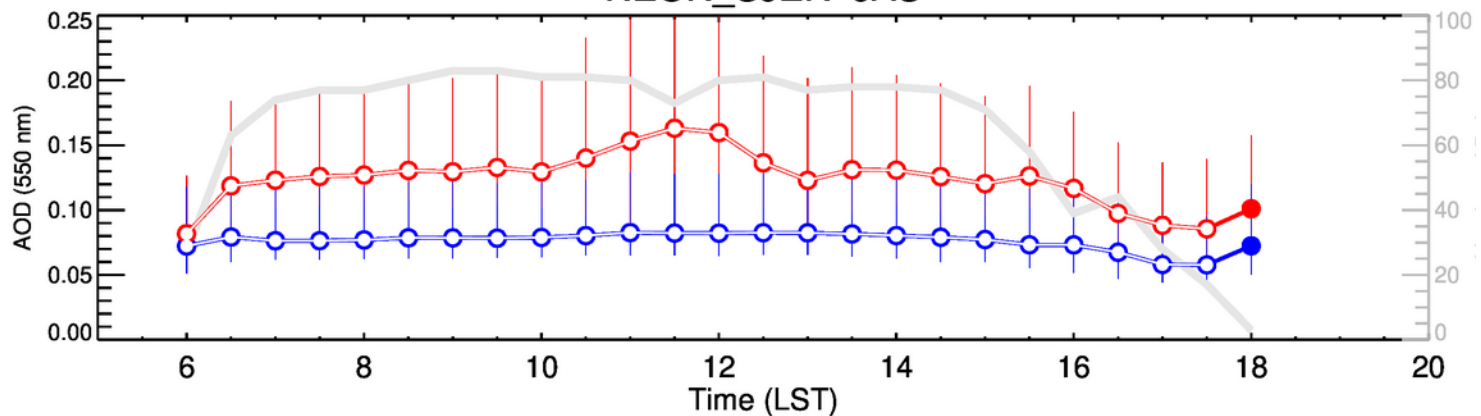

### NEON\_SJER-OND

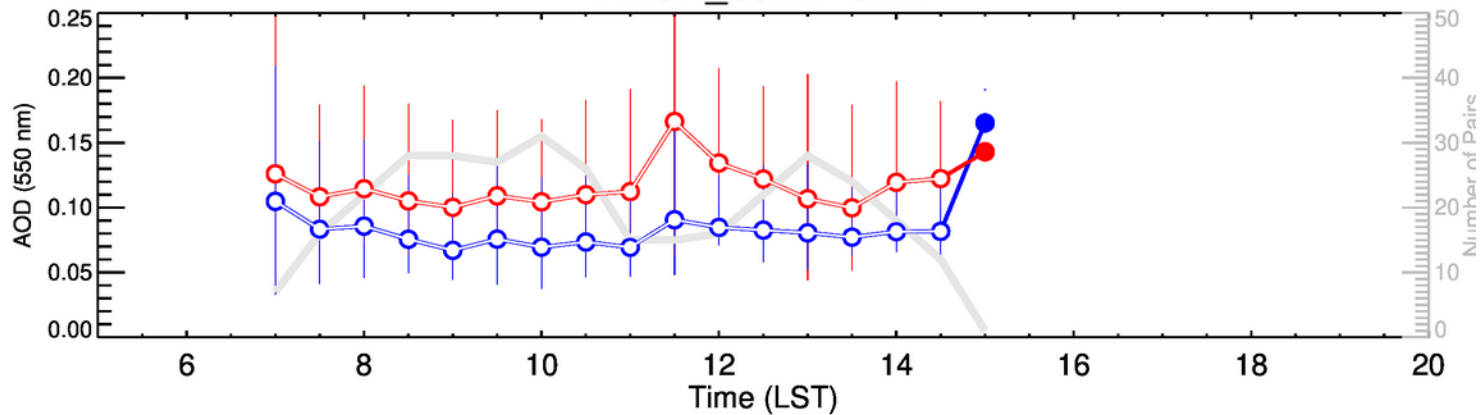

### NEON\_SJER-JFM

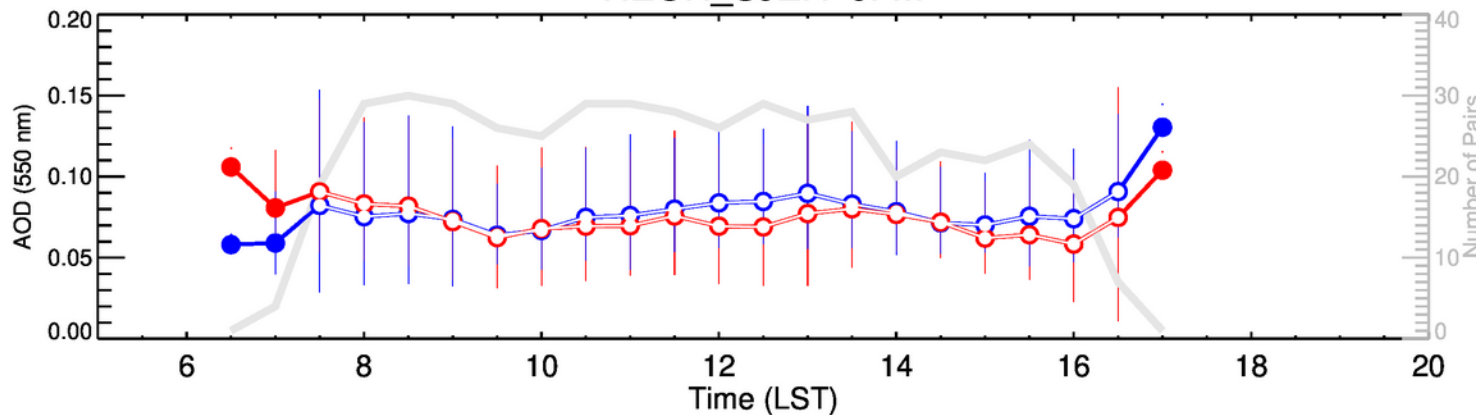



NEON\_TALL-AMJ

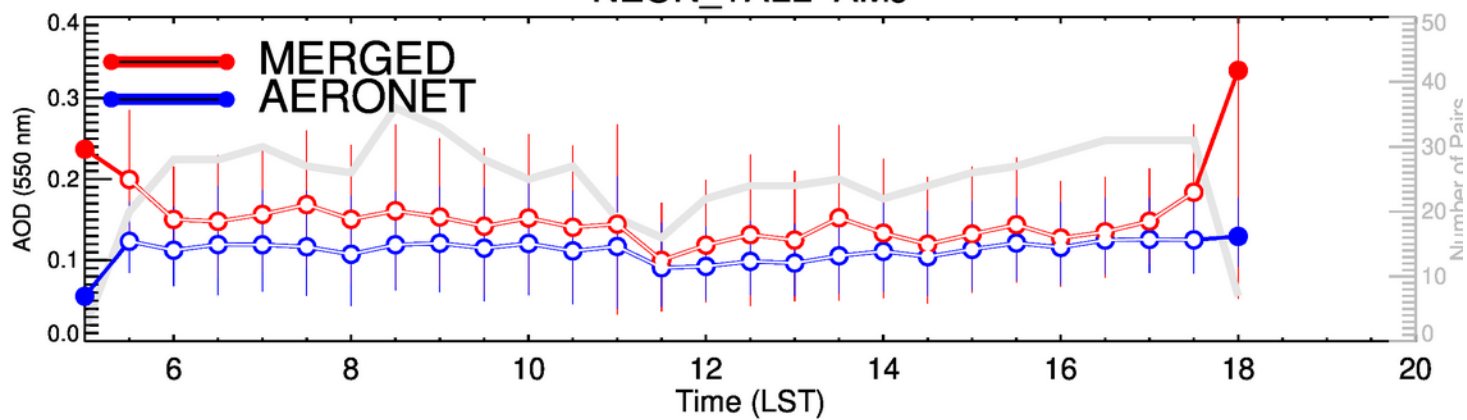

NEON\_TALL-JAS

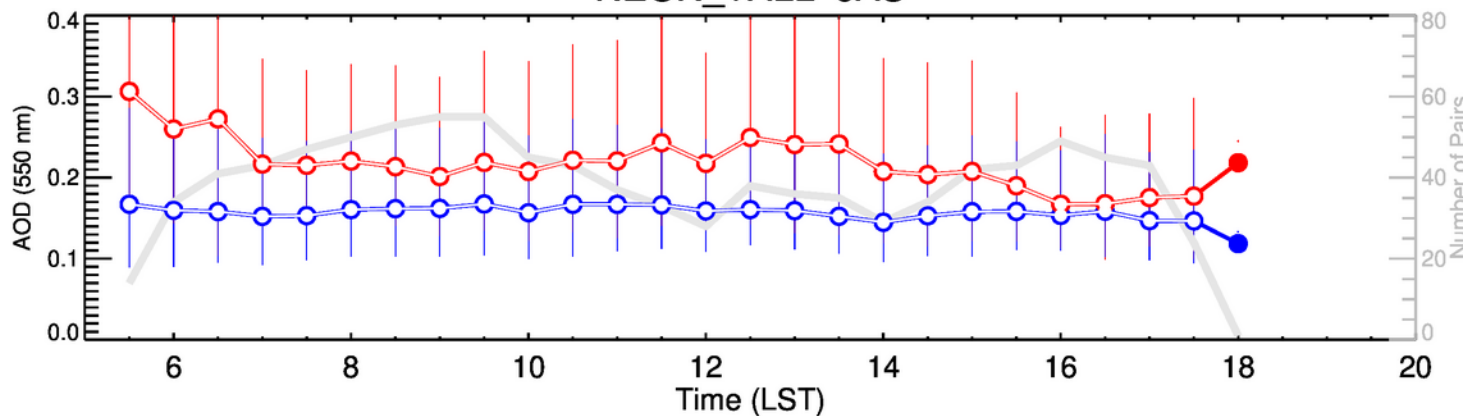

NEON\_TALL-OND

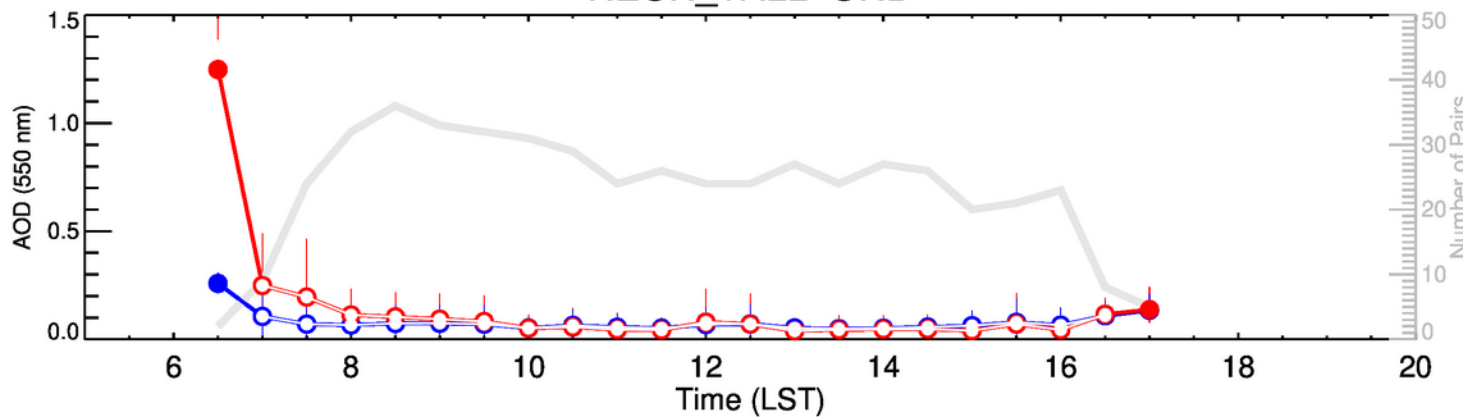

NEON\_TALL-JFM

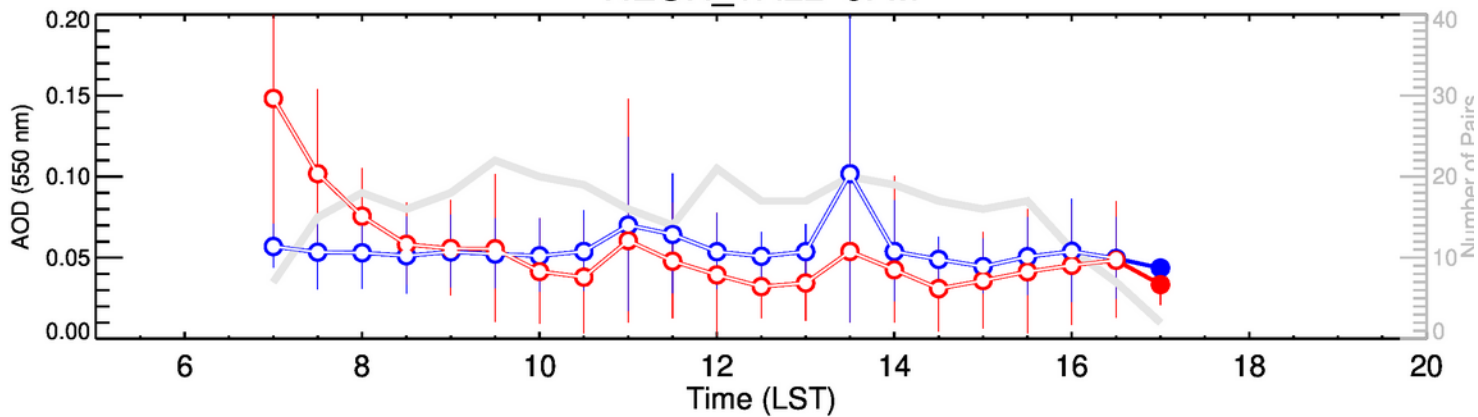

### NEON\_UKFS-AMJ

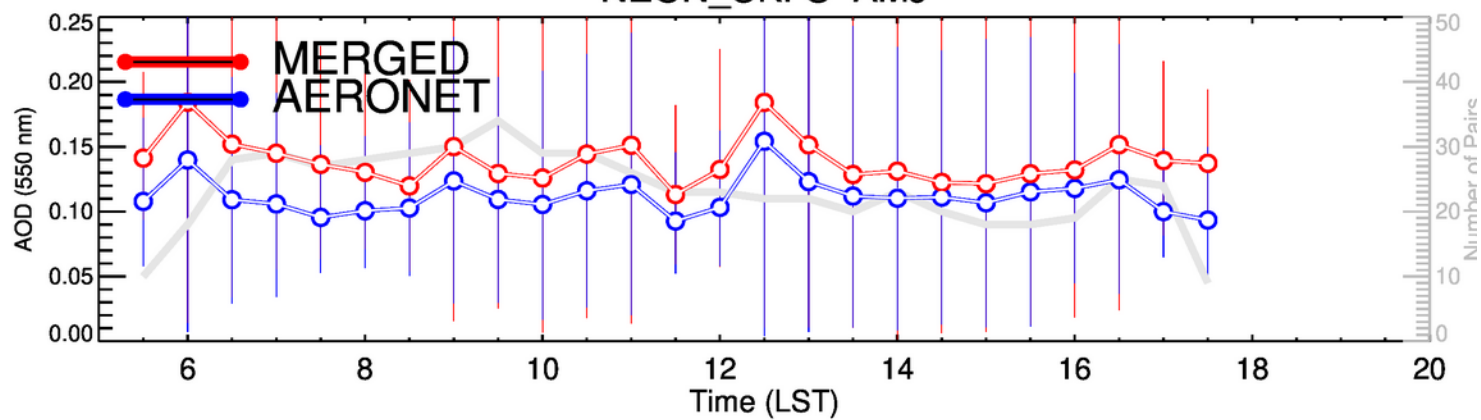

### NEON\_UKFS-JAS

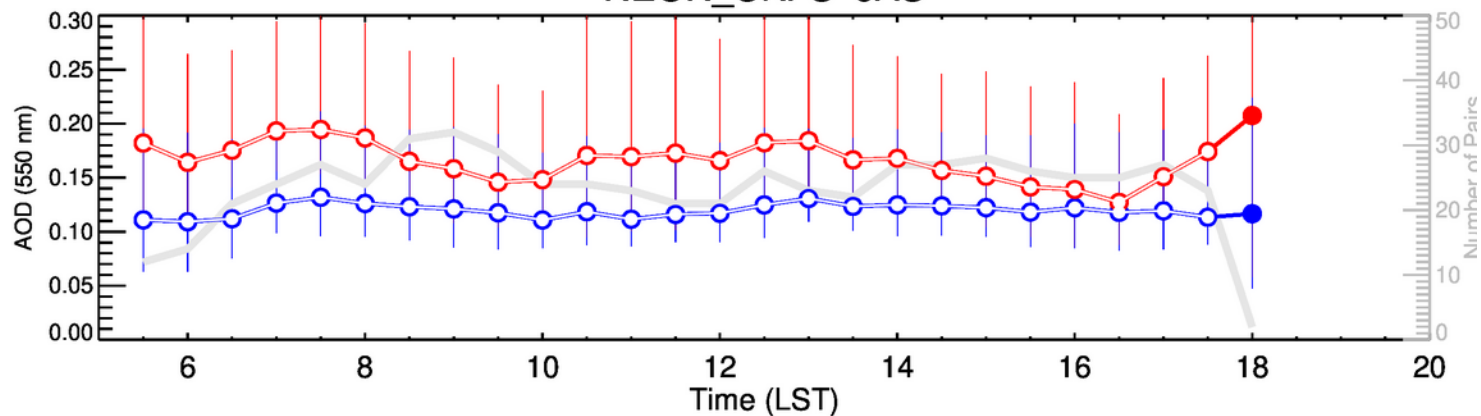

### NEON\_UKFS-OND

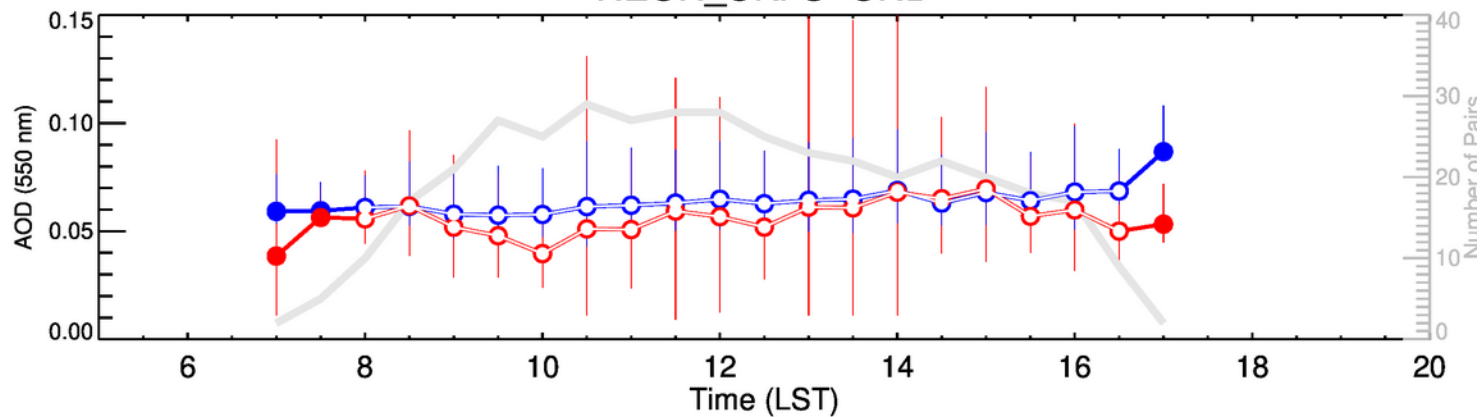

### NEON\_UKFS-JFM

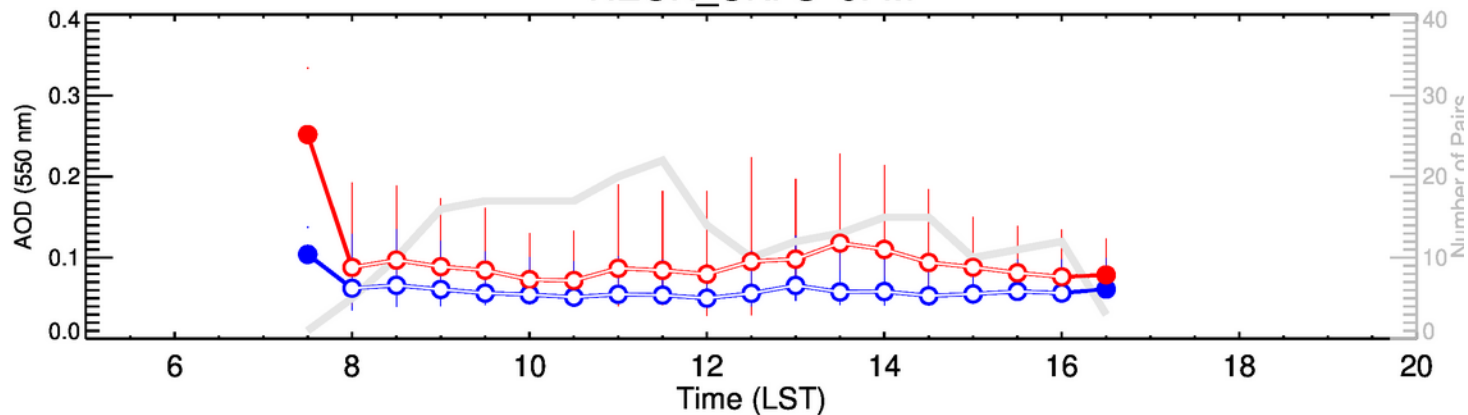

NEON\_WREF-AMJ

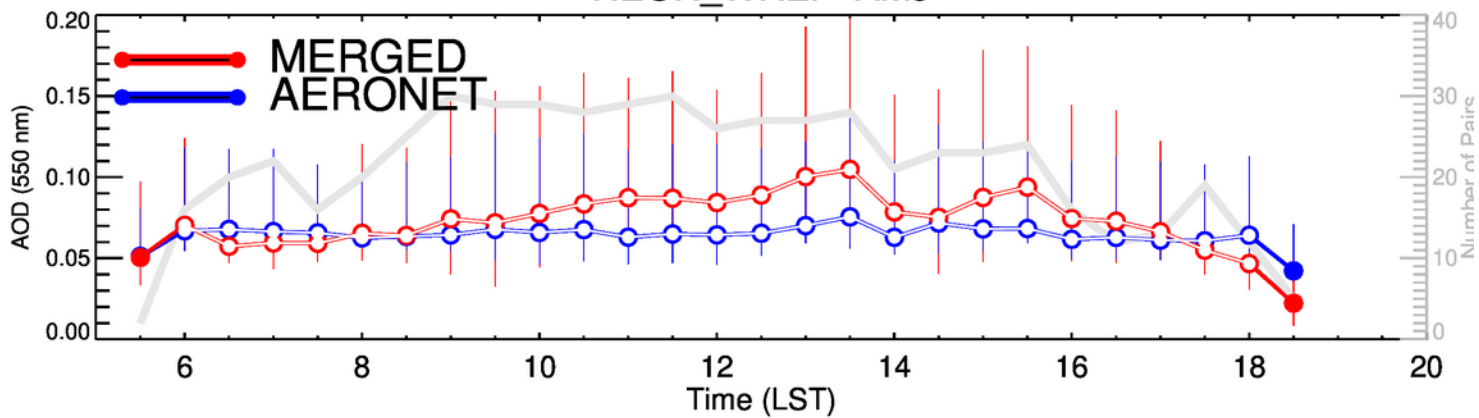

NEON\_WREF-JAS

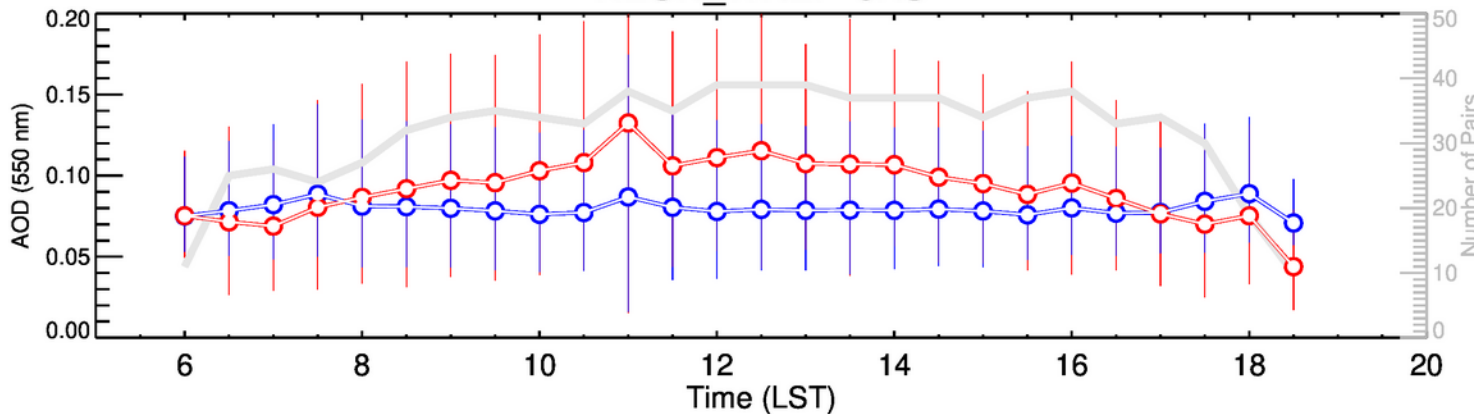

NEON\_WREF-OND

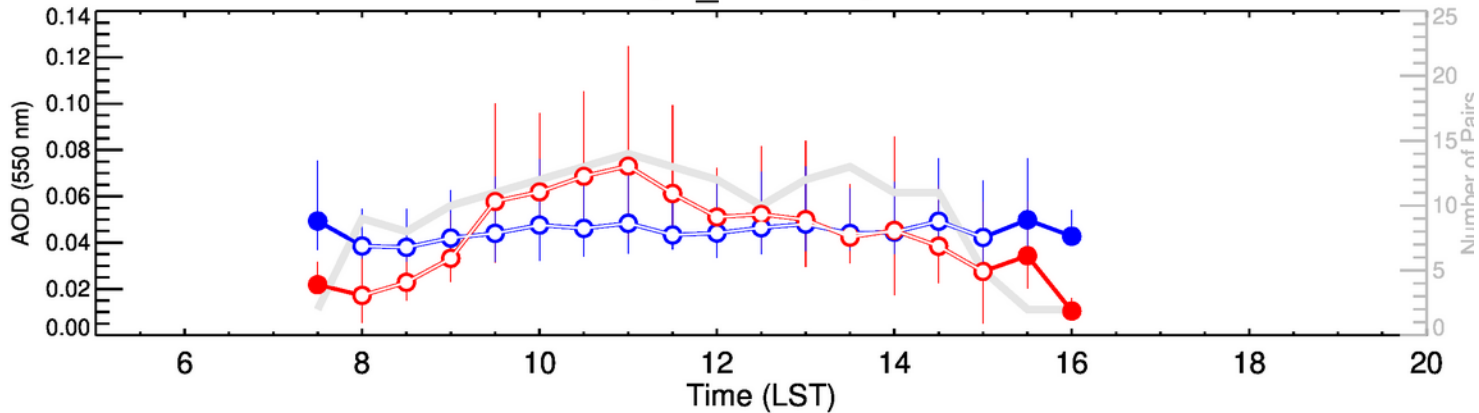

NEON\_WREF-JFM

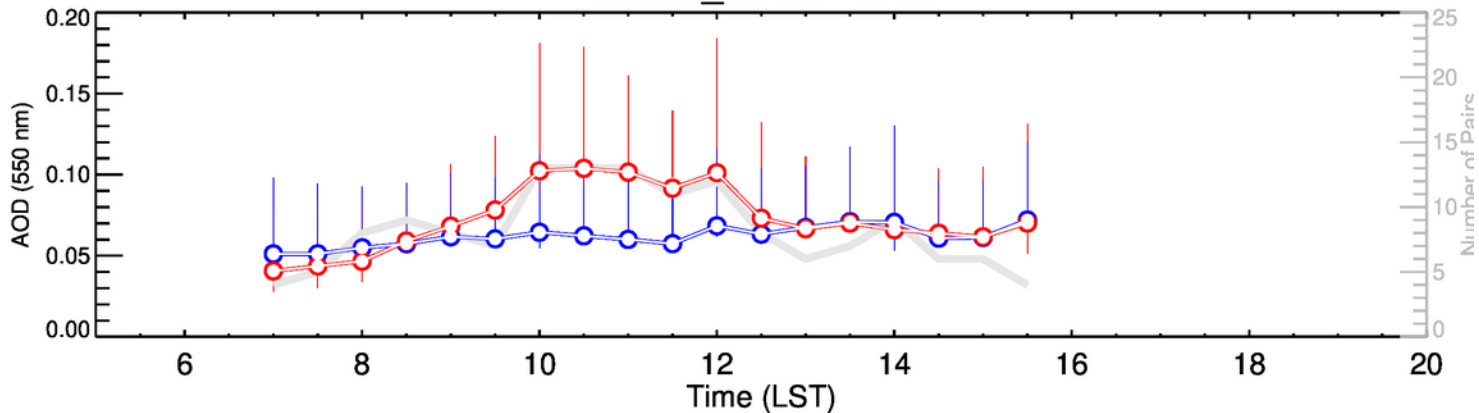

### NEON-Disney-AMJ

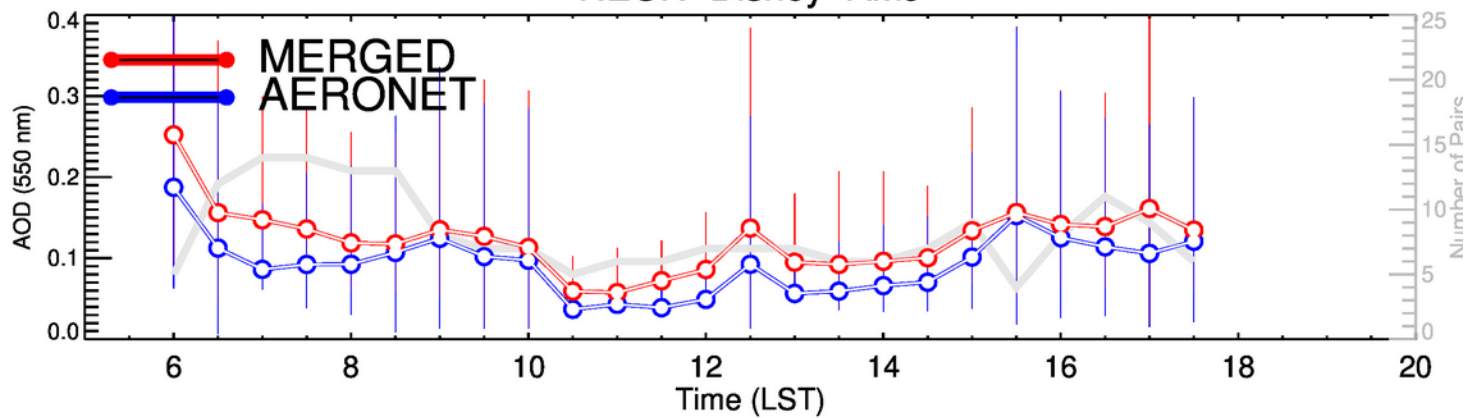

### NEON-Disney-JAS

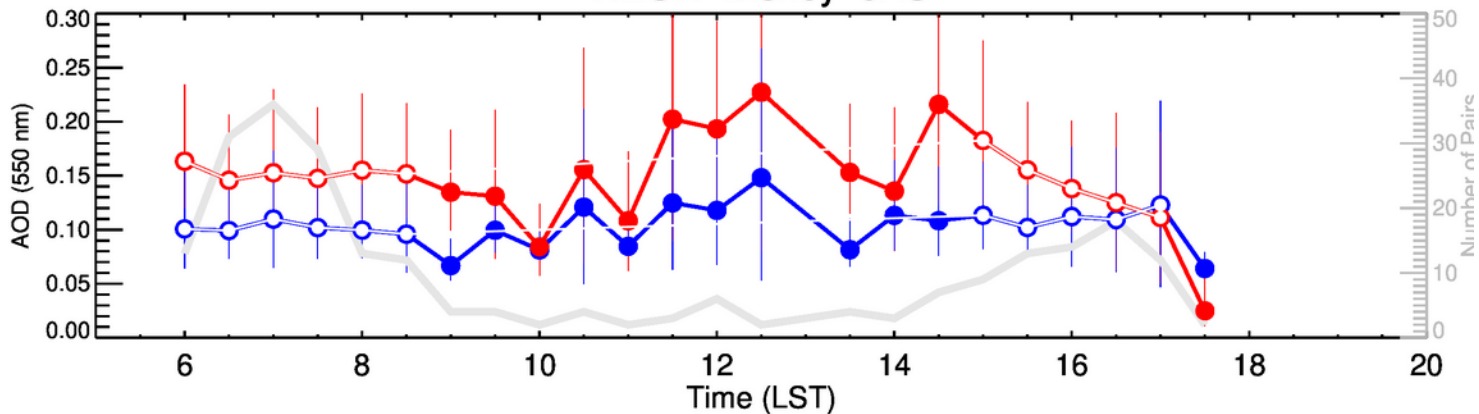

### NEON-Disney-OND

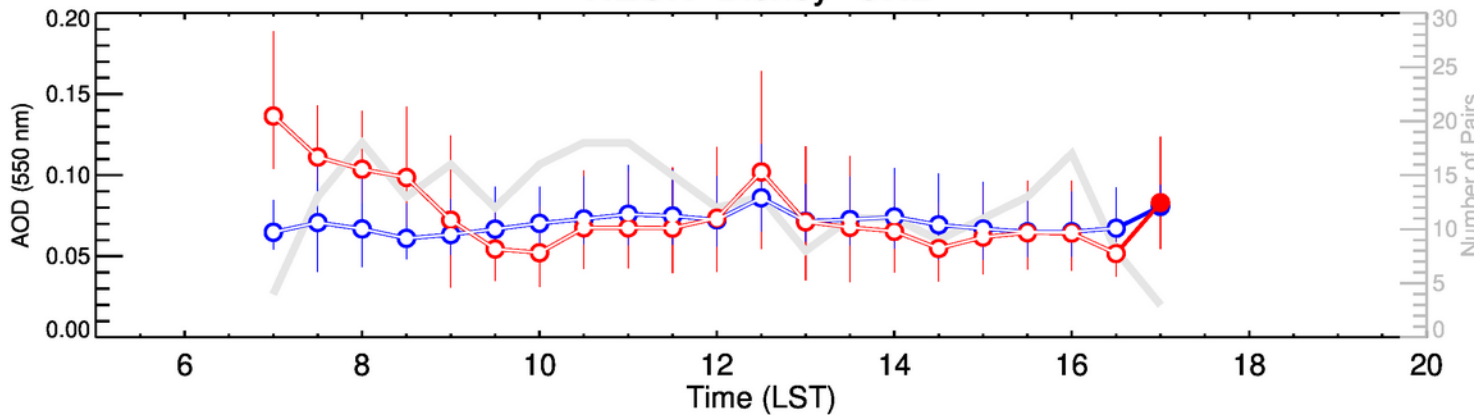

### NEON-Disney-JFM

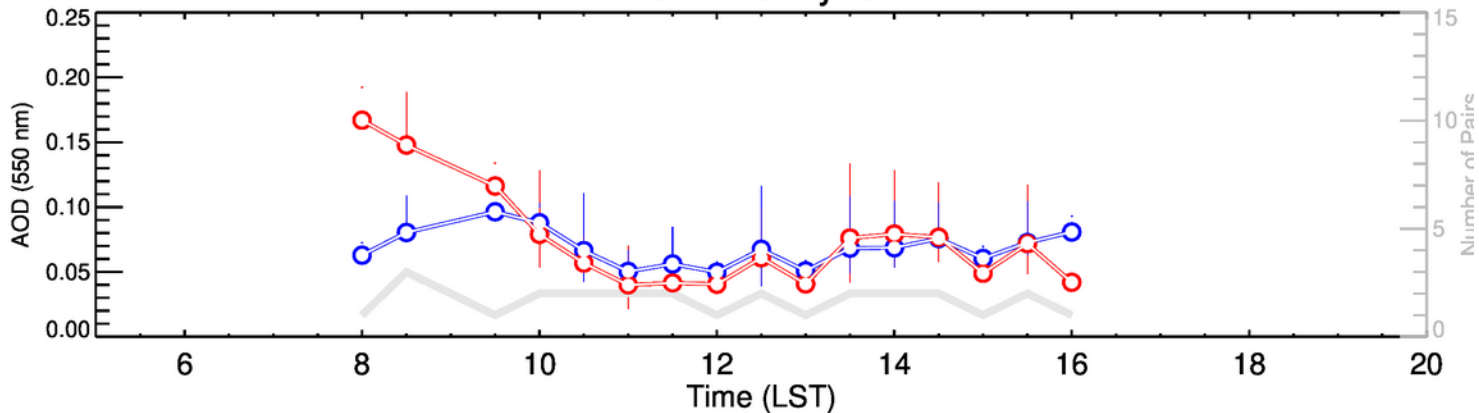

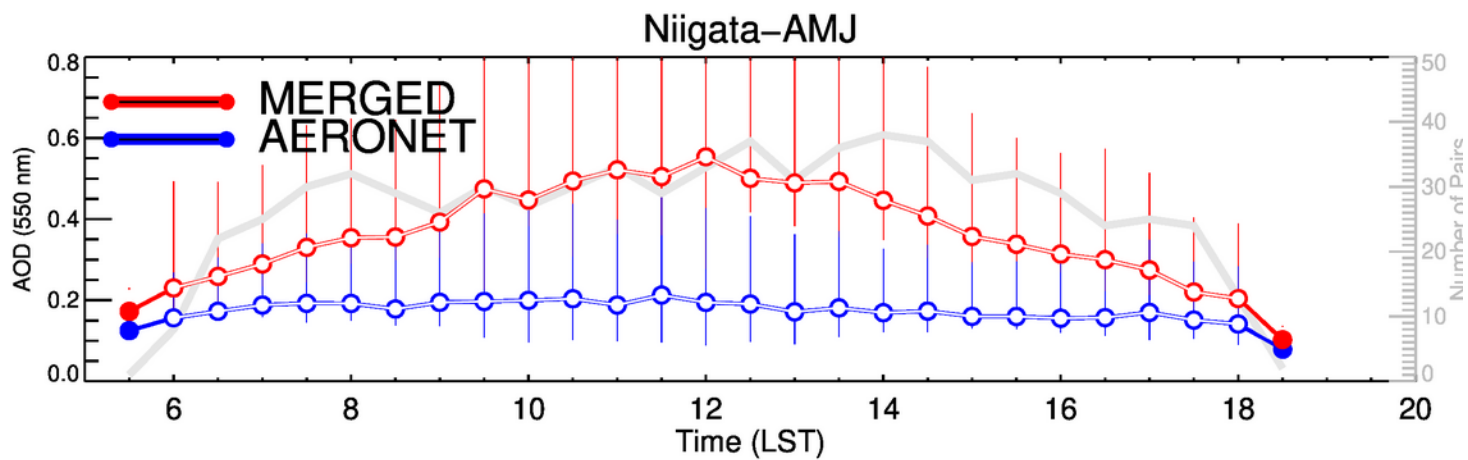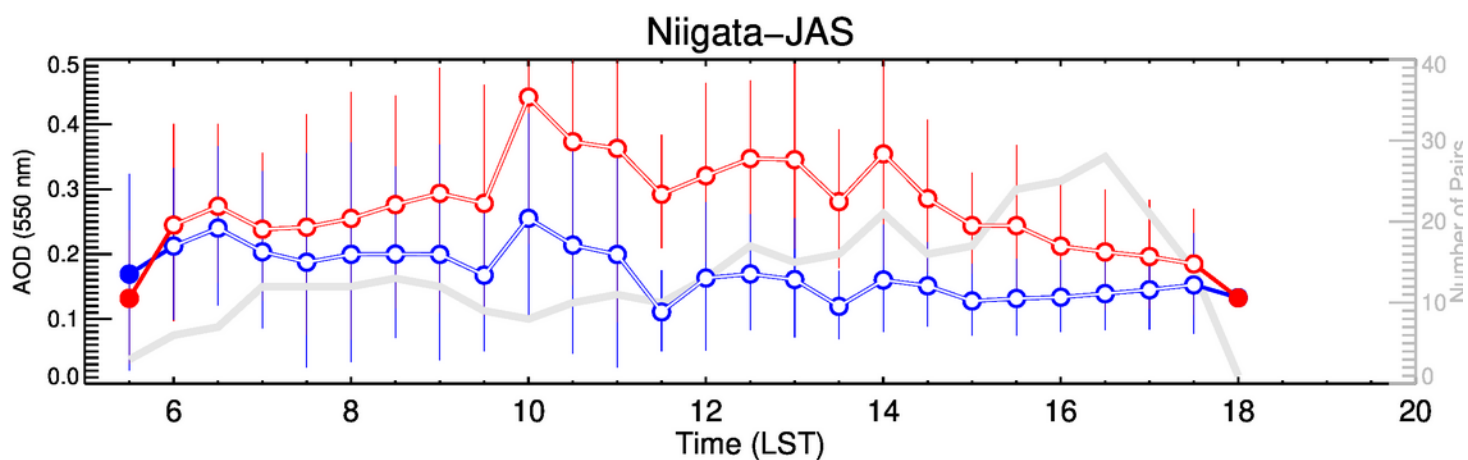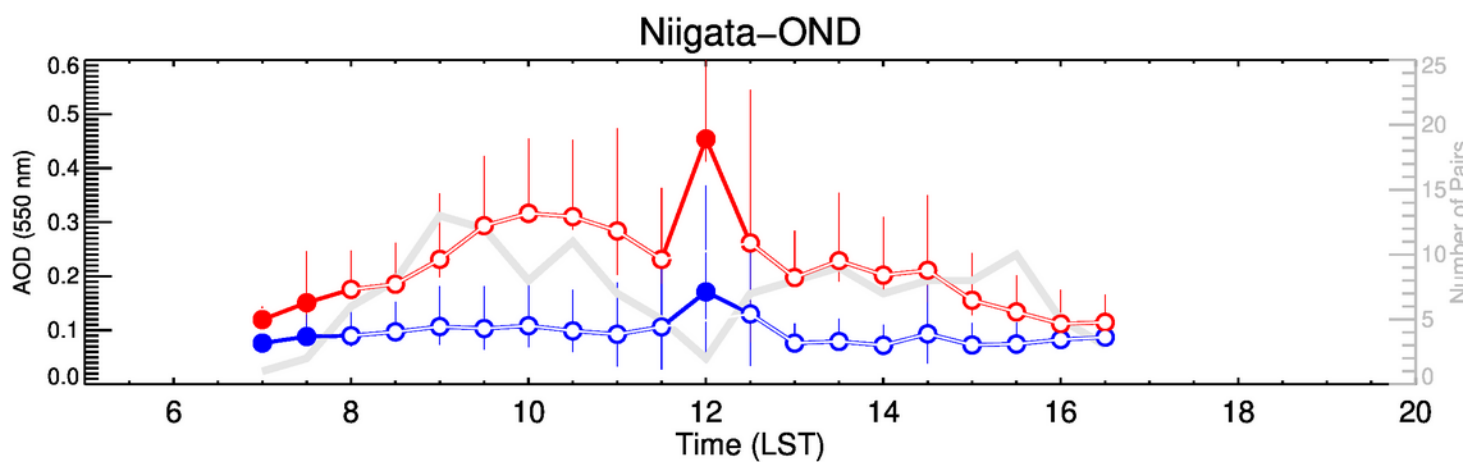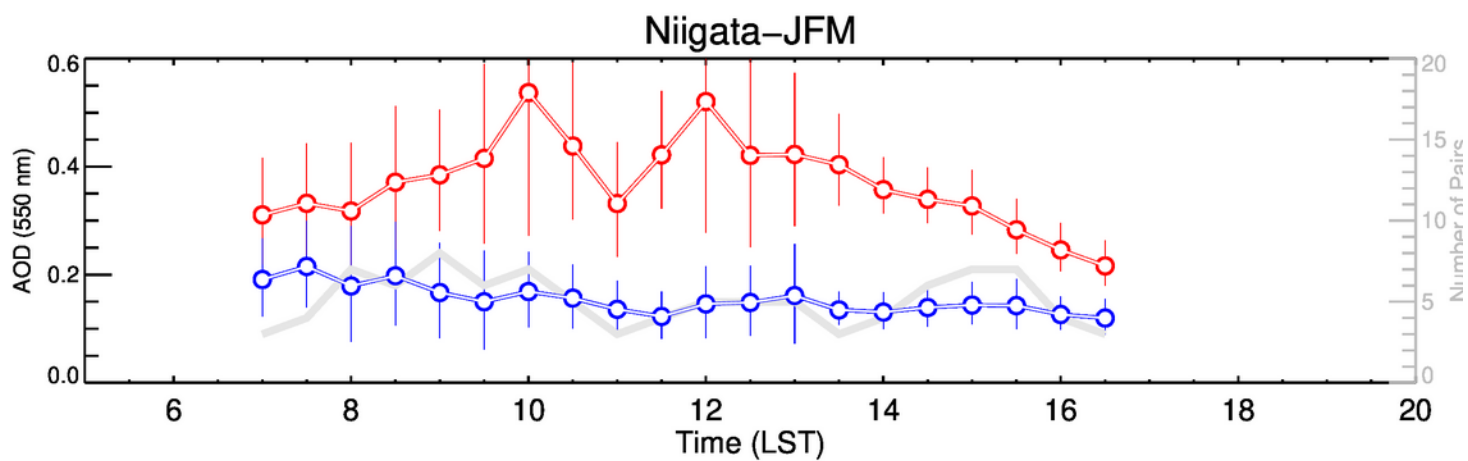

### Nong\_Khai-AMJ

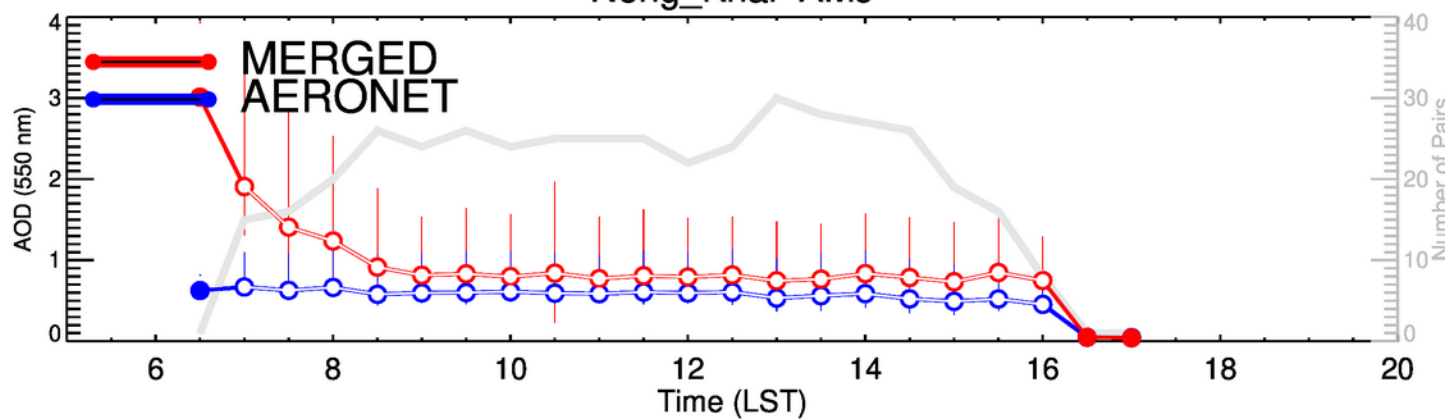

### Nong\_Khai-JAS

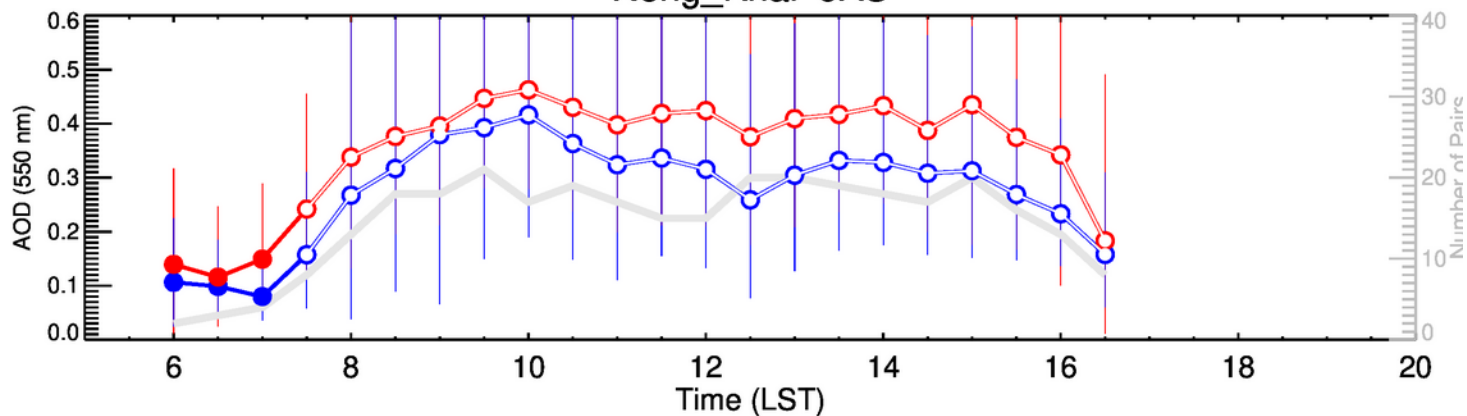

### Nong\_Khai-OND

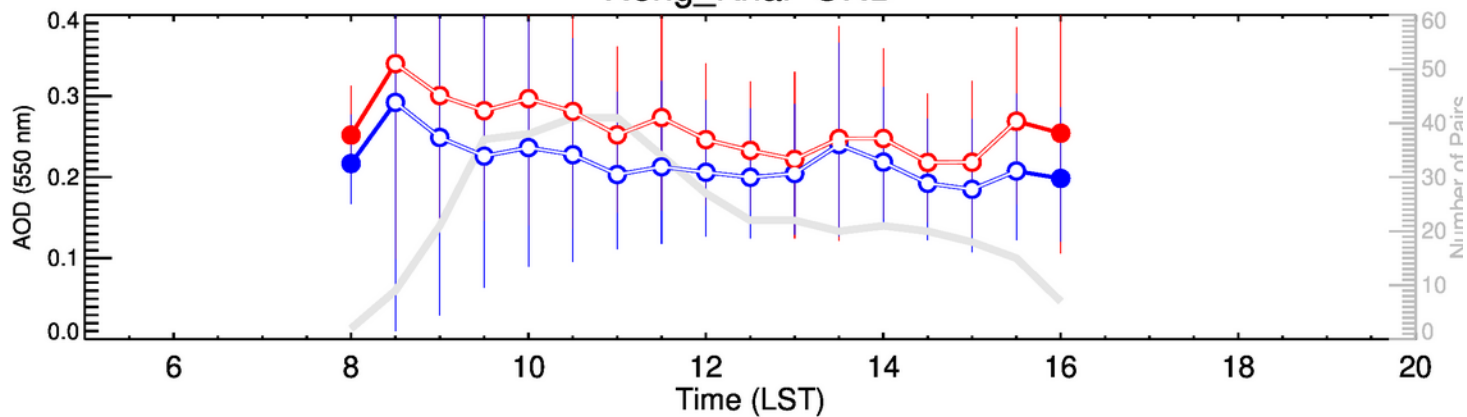

### Nong\_Khai-JFM

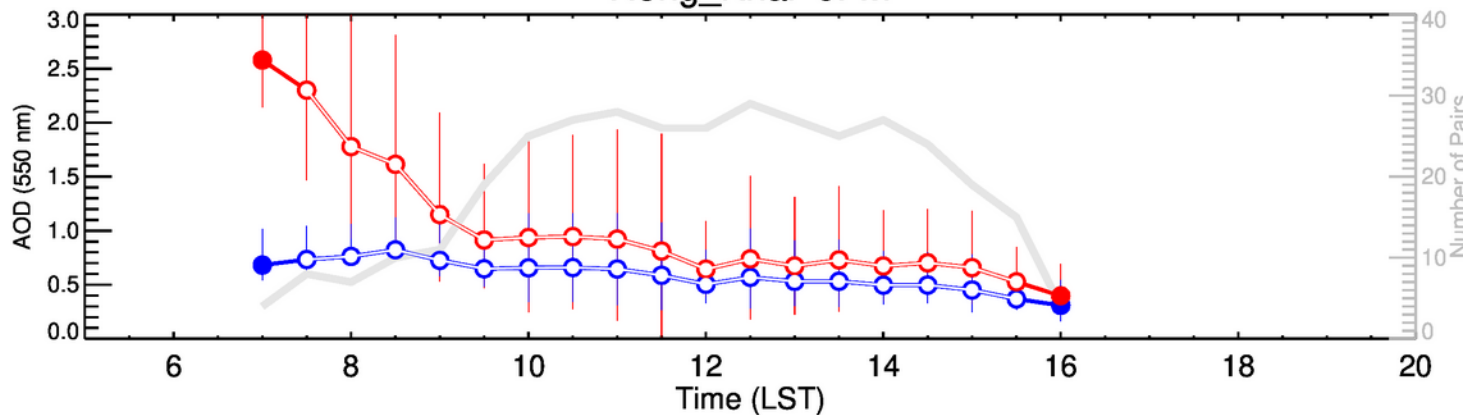

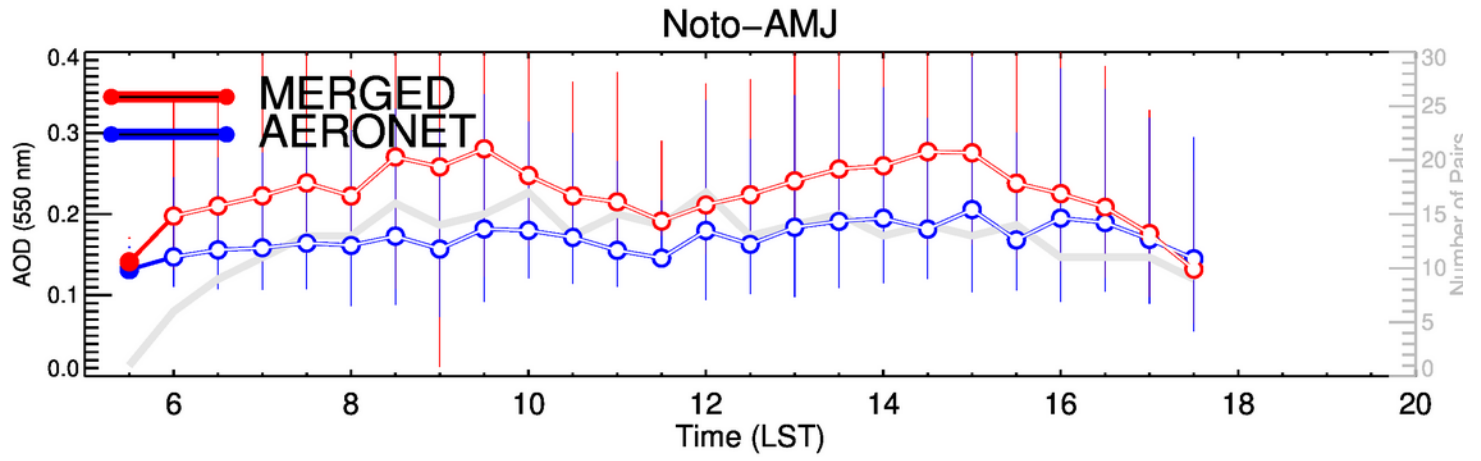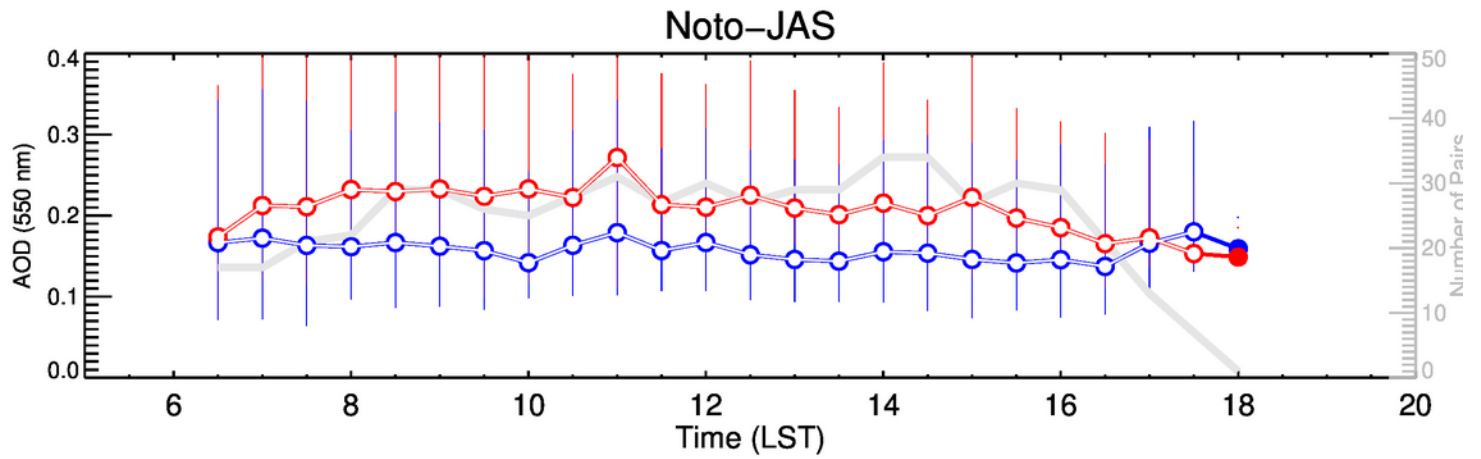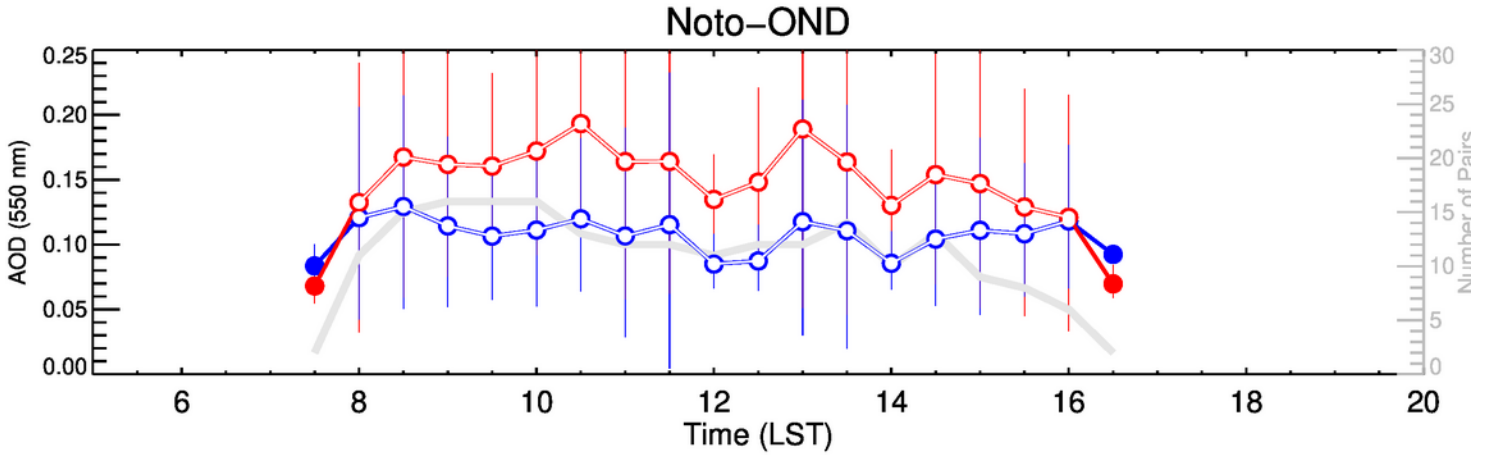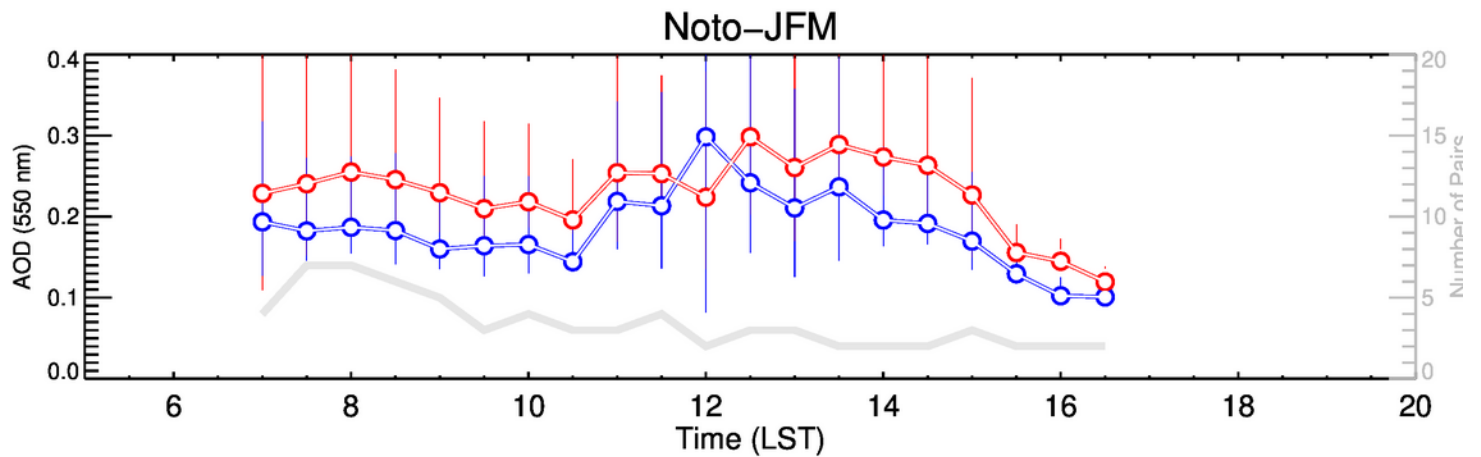

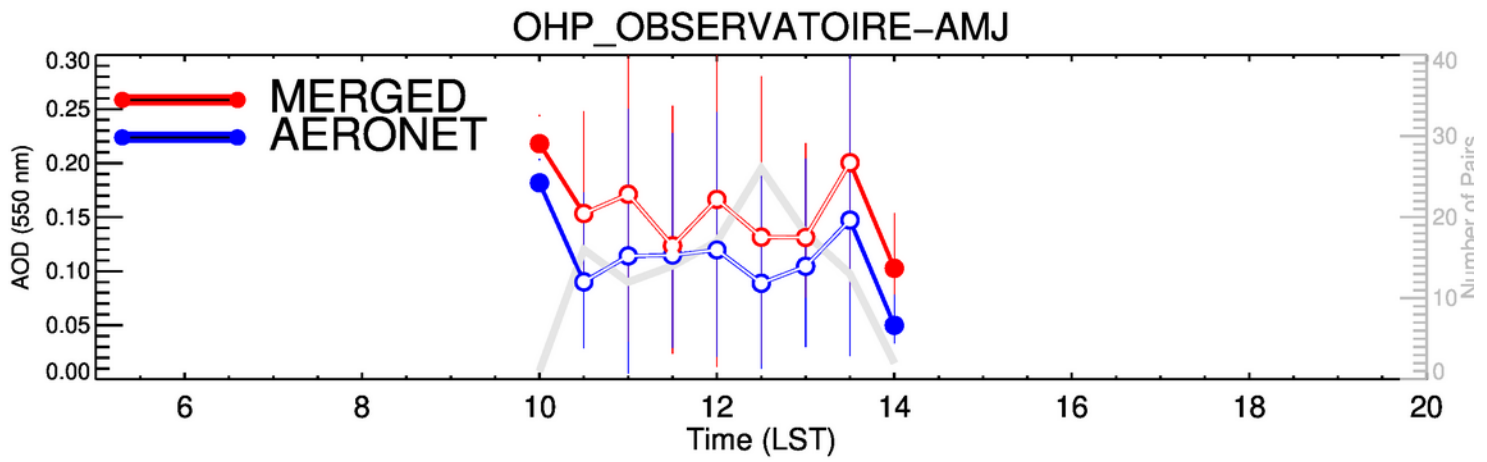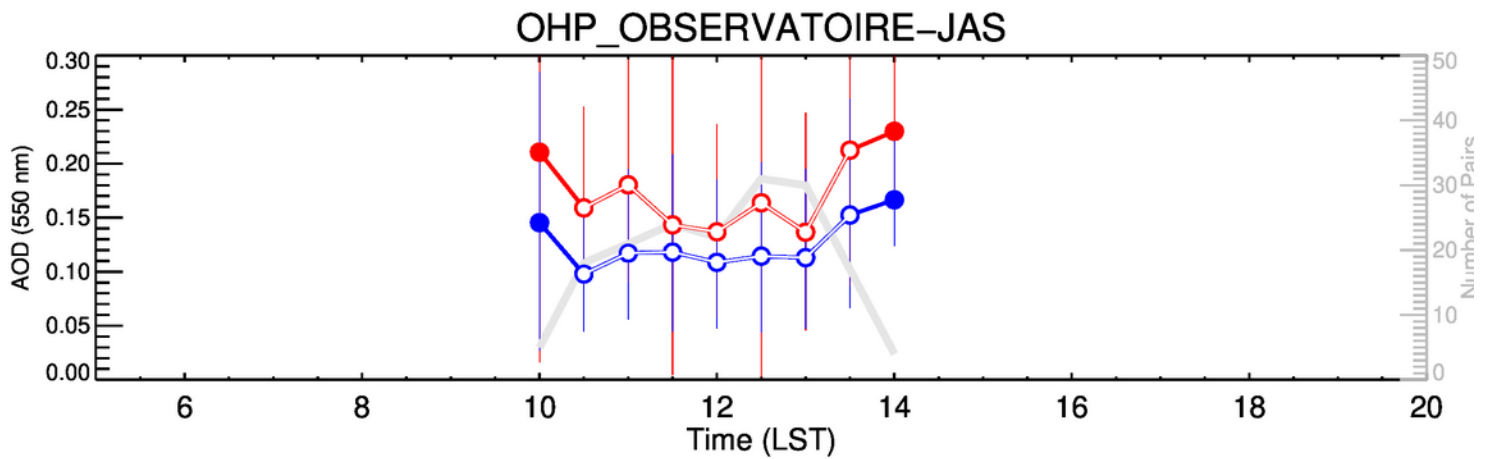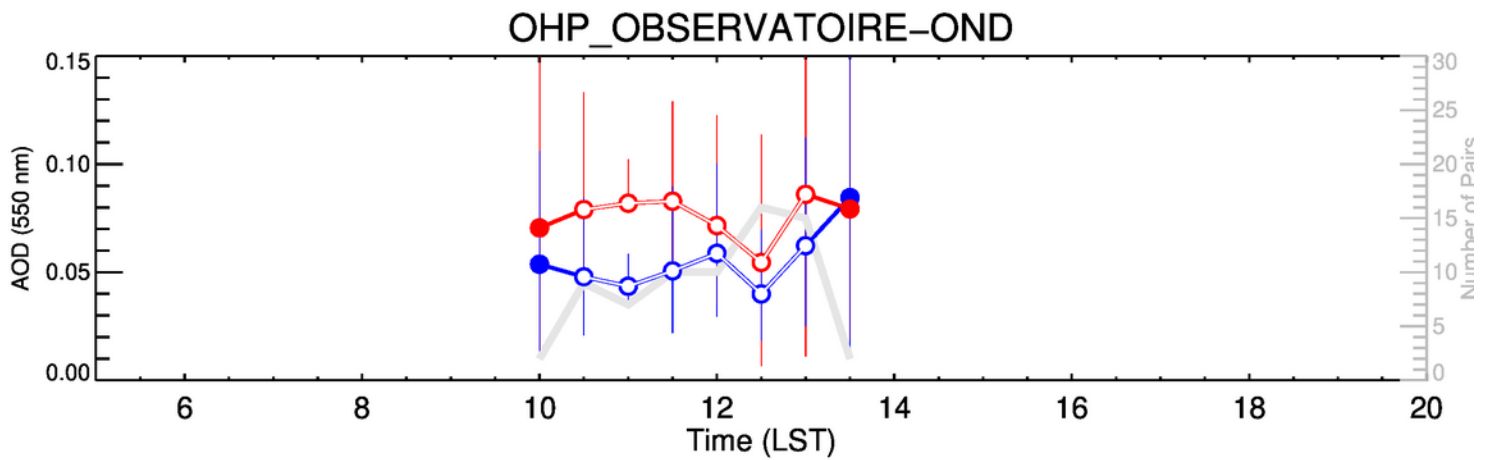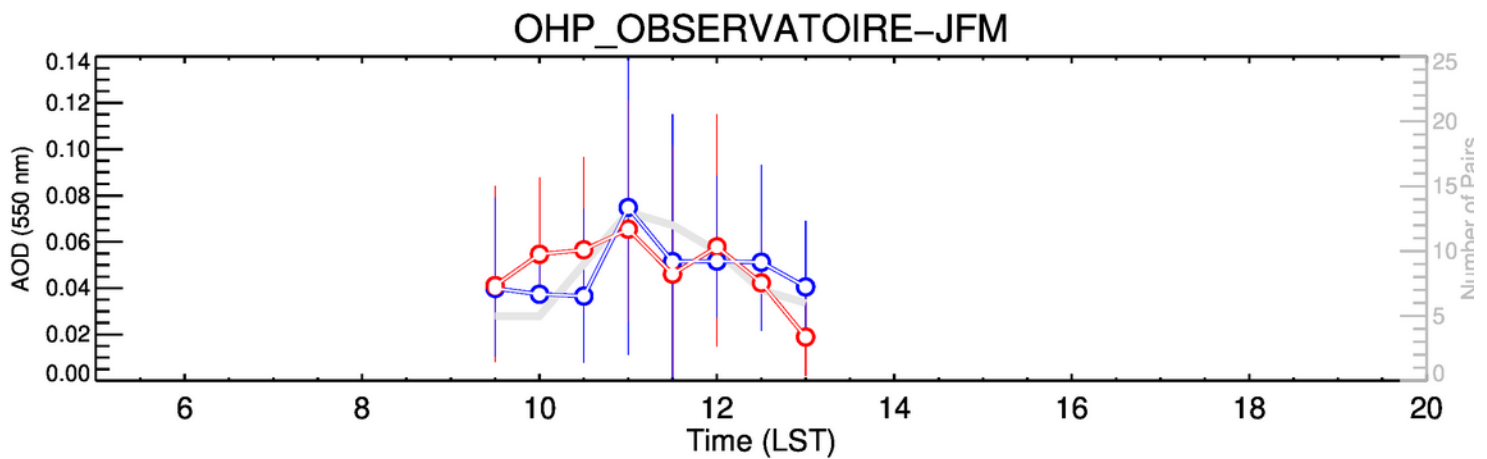



### Palaiseau-AMJ

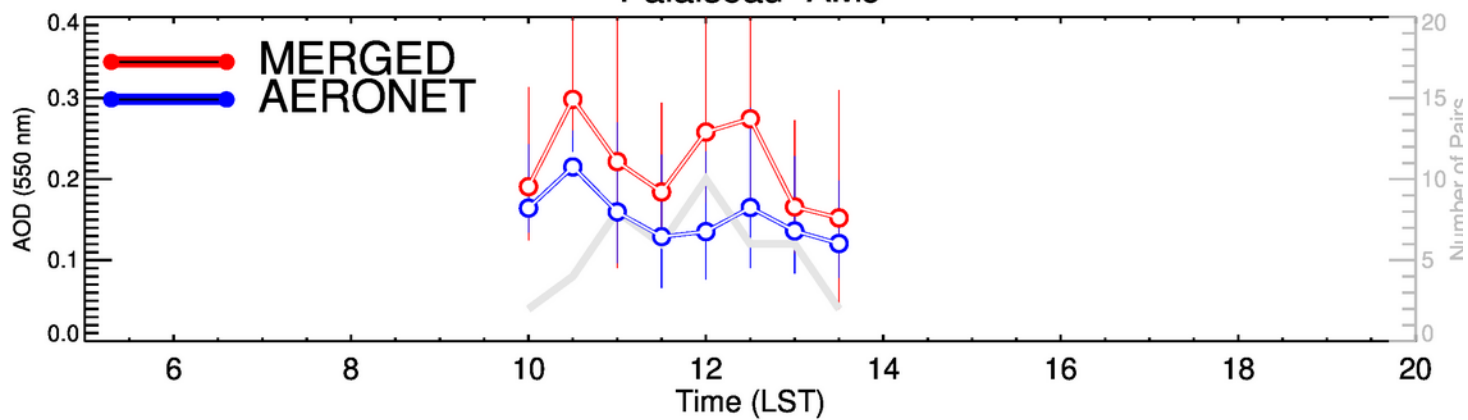

### Palaiseau-JAS

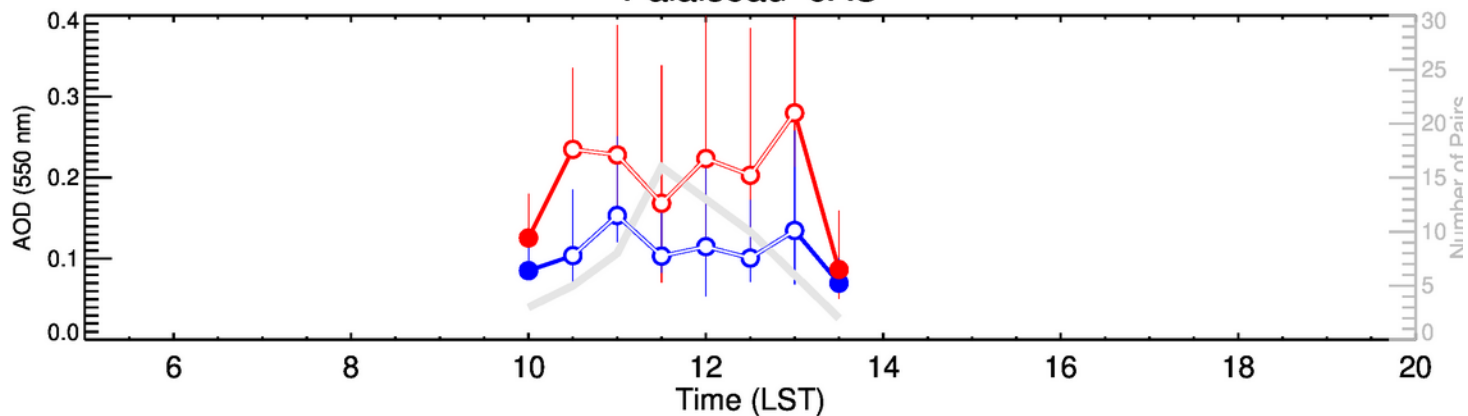

### Palaiseau-JFM

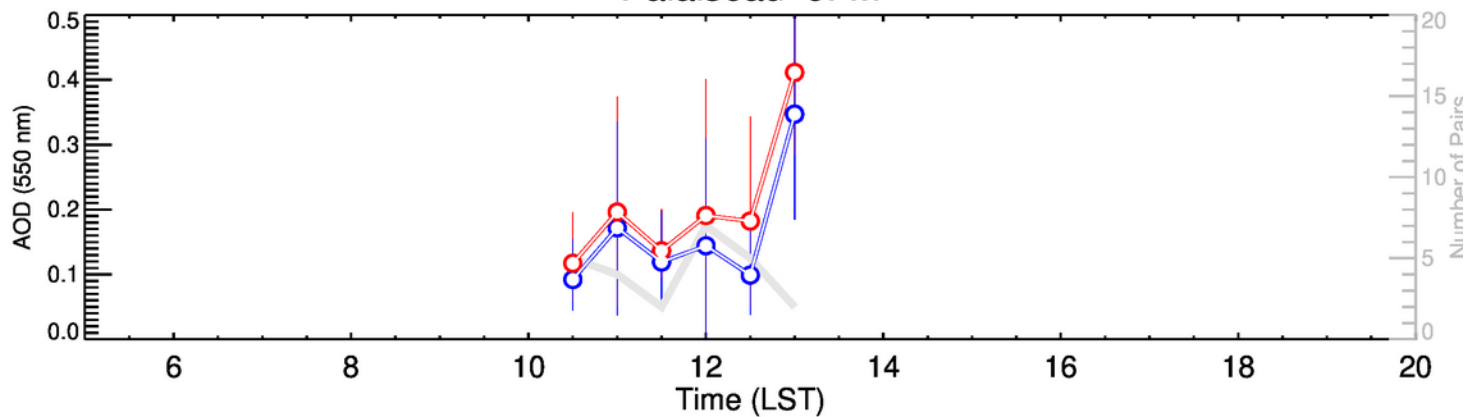

### Palangkaraya-AMJ

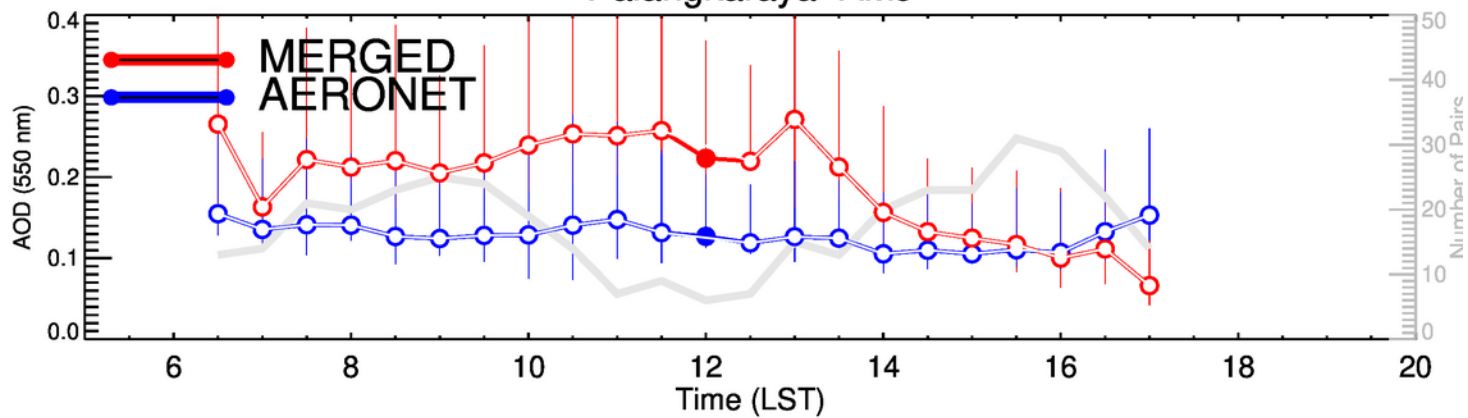

### Palangkaraya-JAS

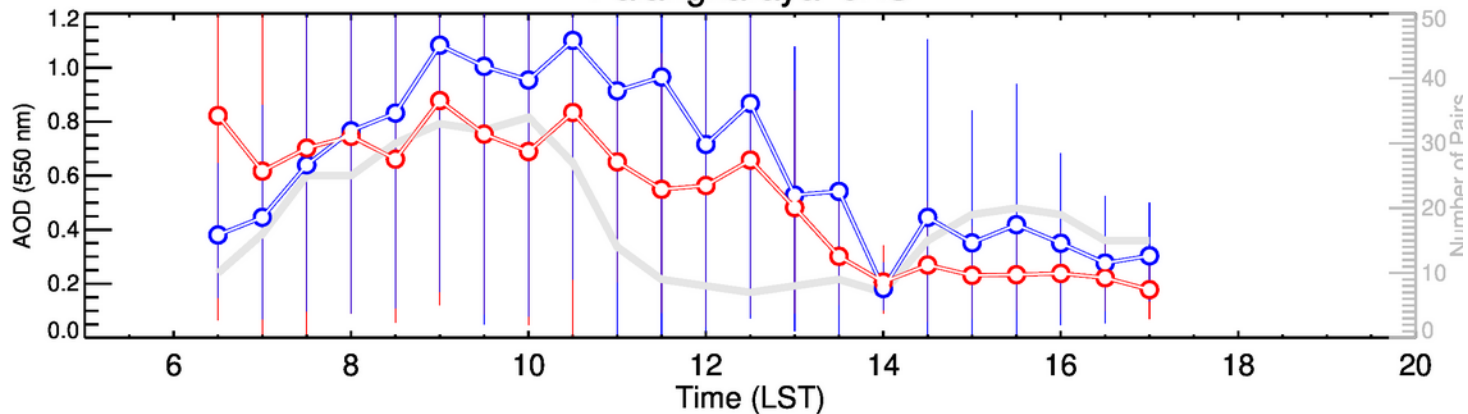

### Palangkaraya-OND

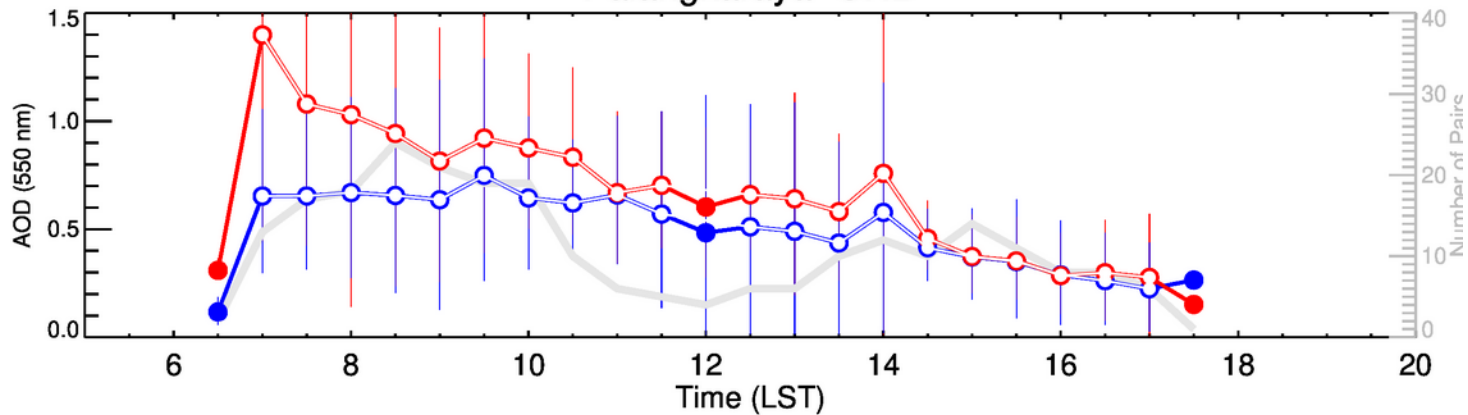

### Palangkaraya-JFM

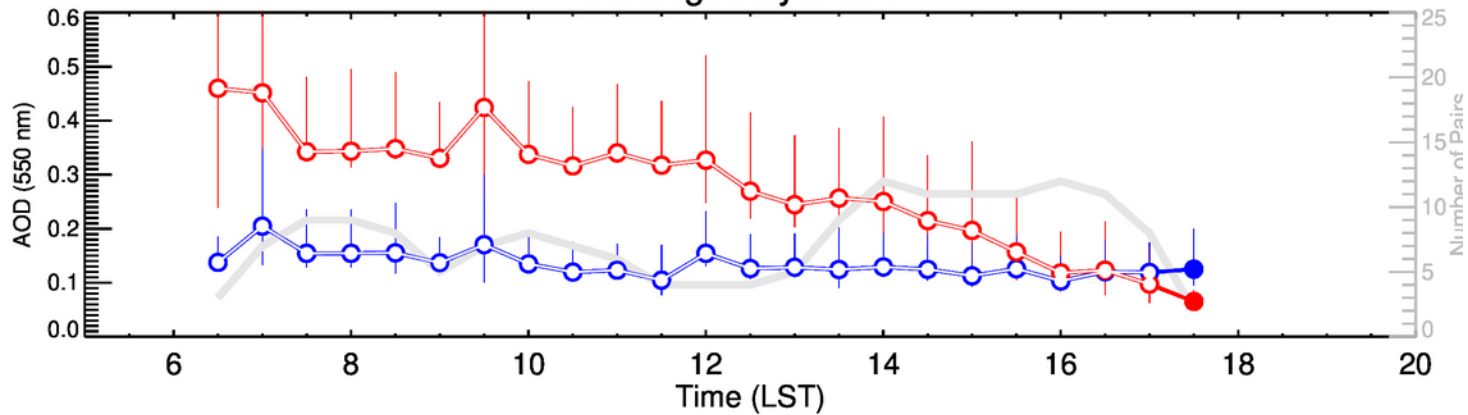

Palma\_de\_Mallorca-AMJ

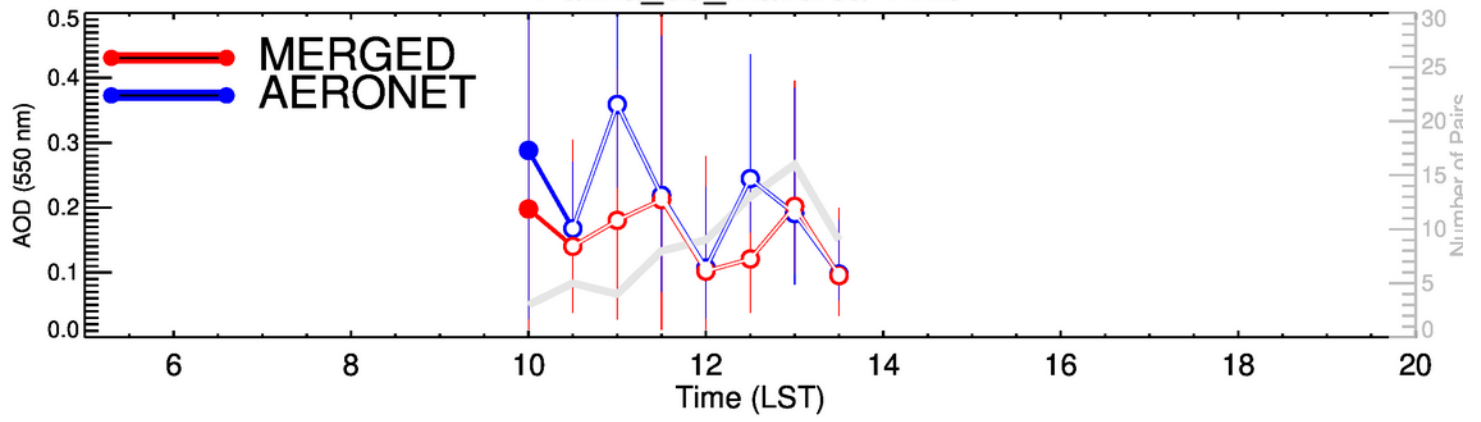

Palma\_de\_Mallorca-JAS

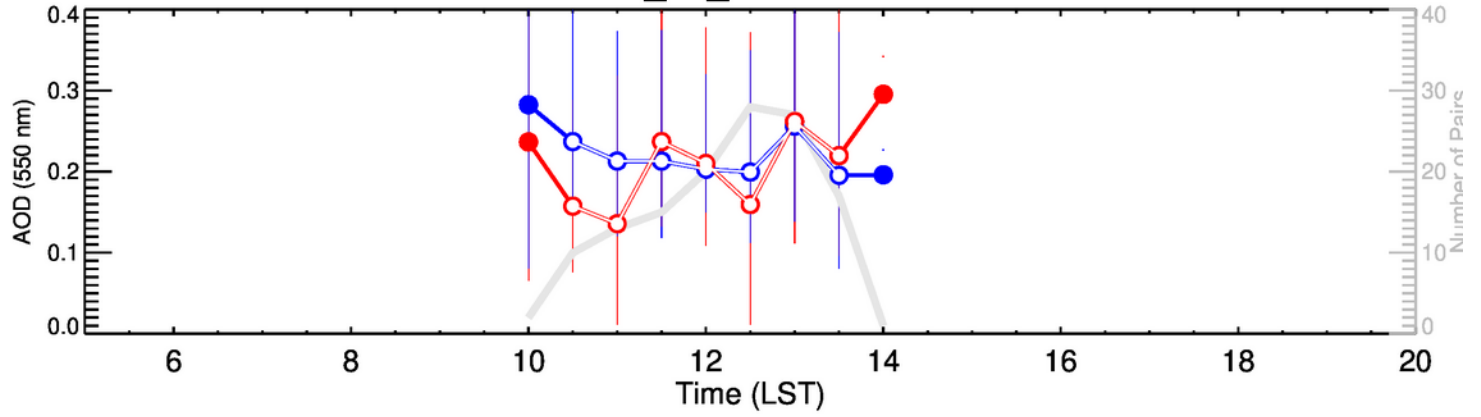

Palma\_de\_Mallorca-OND

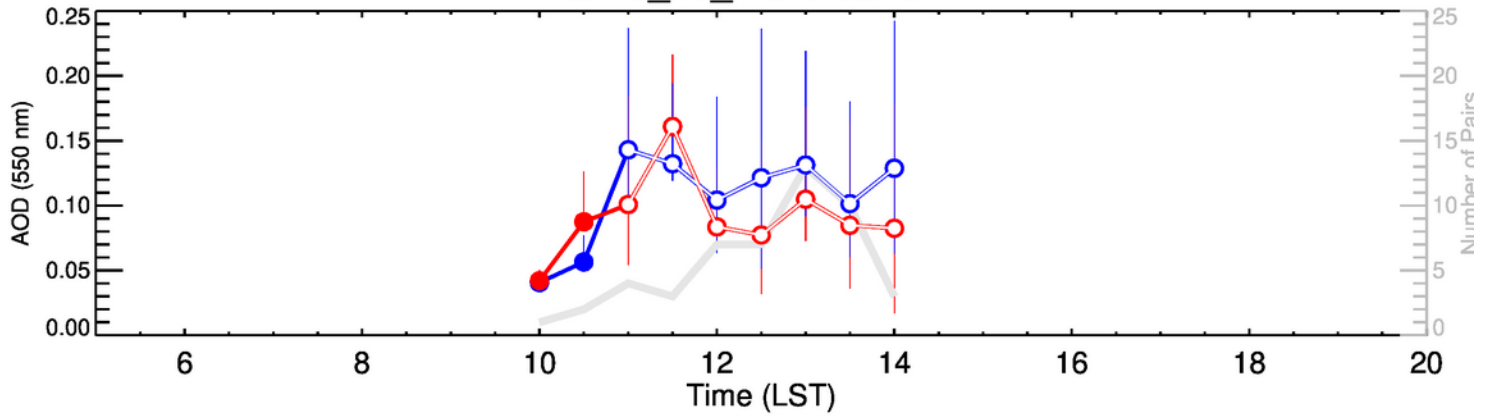

Palma\_de\_Mallorca-JFM

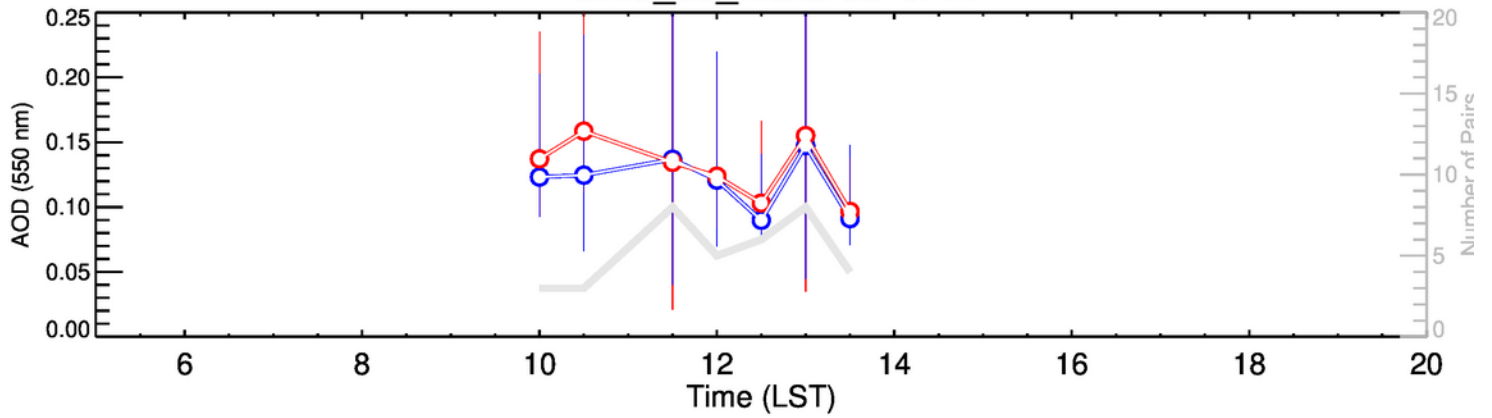

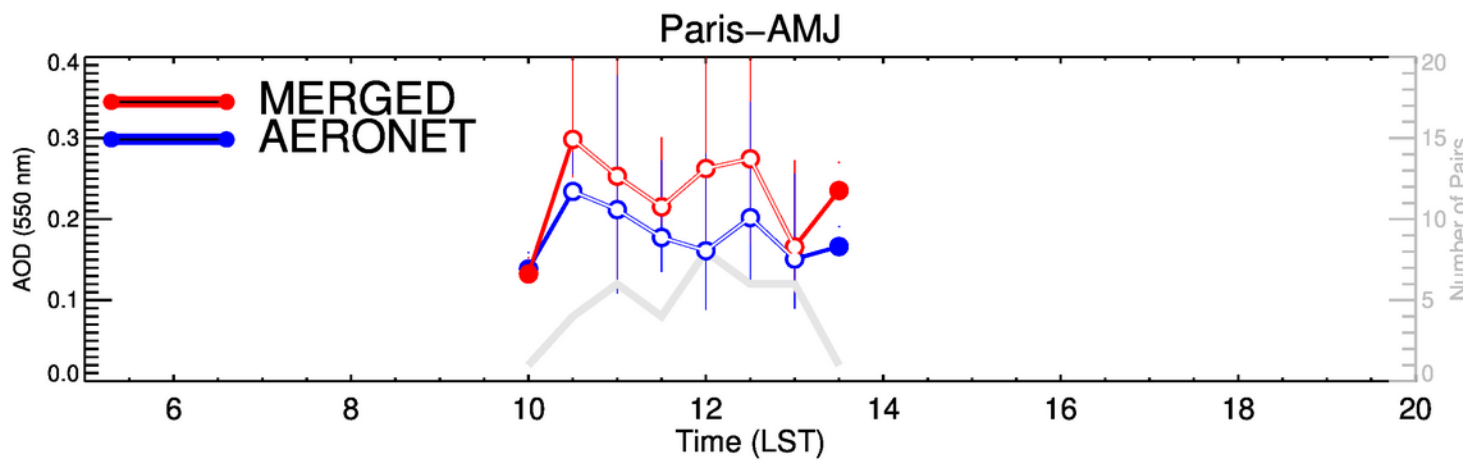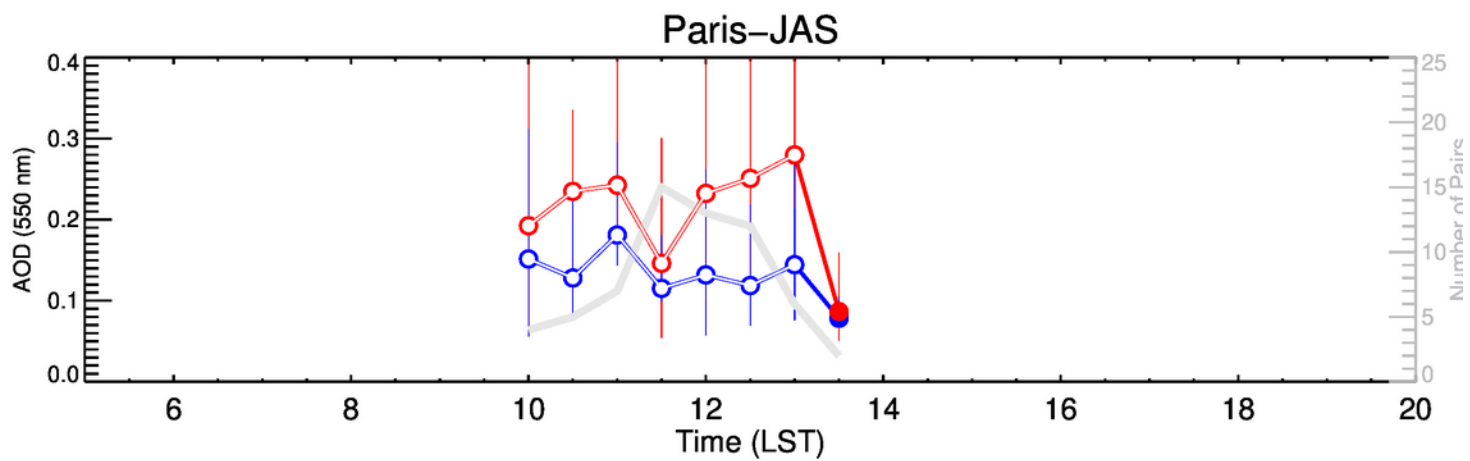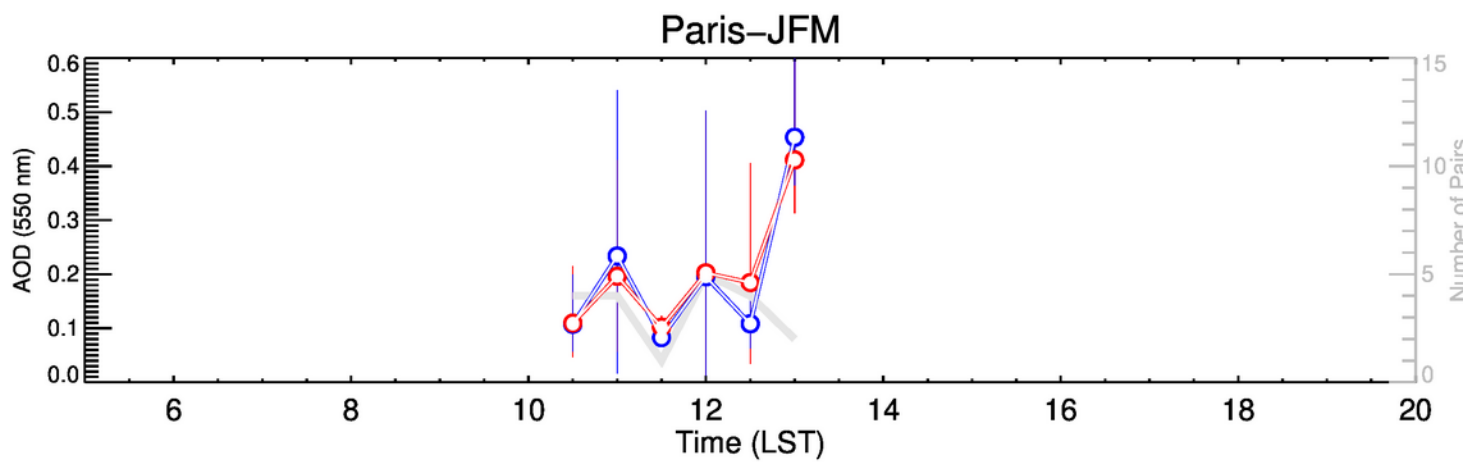

Pinehurst\_Idaho-AMJ

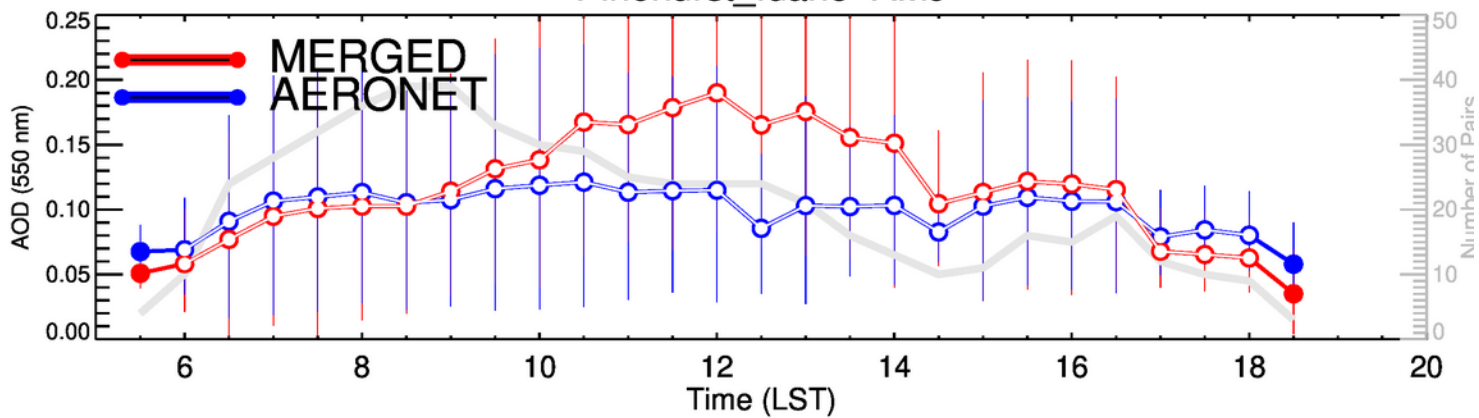

Pinehurst\_Idaho-JAS

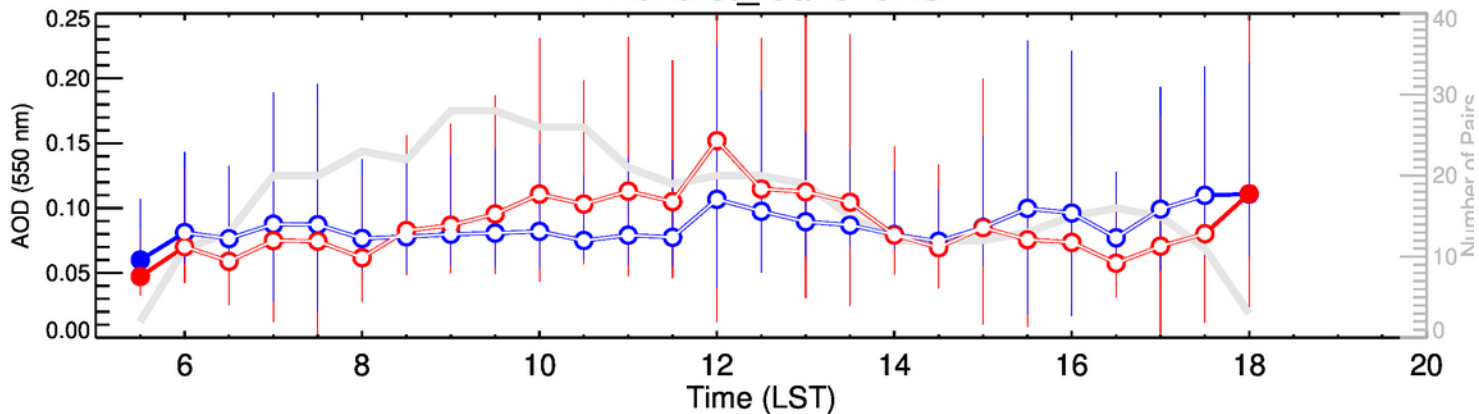

Pinehurst\_Idaho-OND

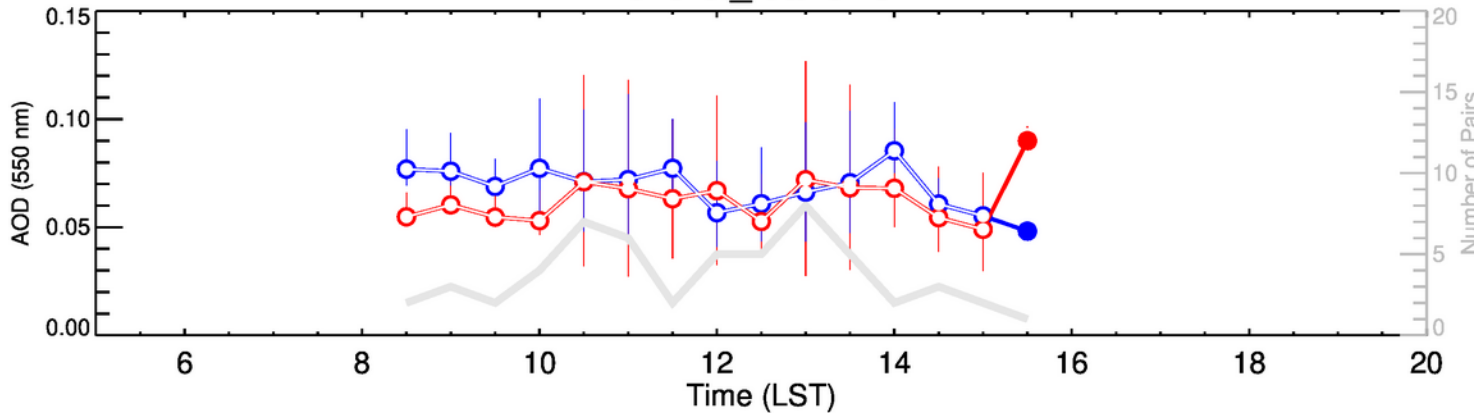

Pinehurst\_Idaho-JFM

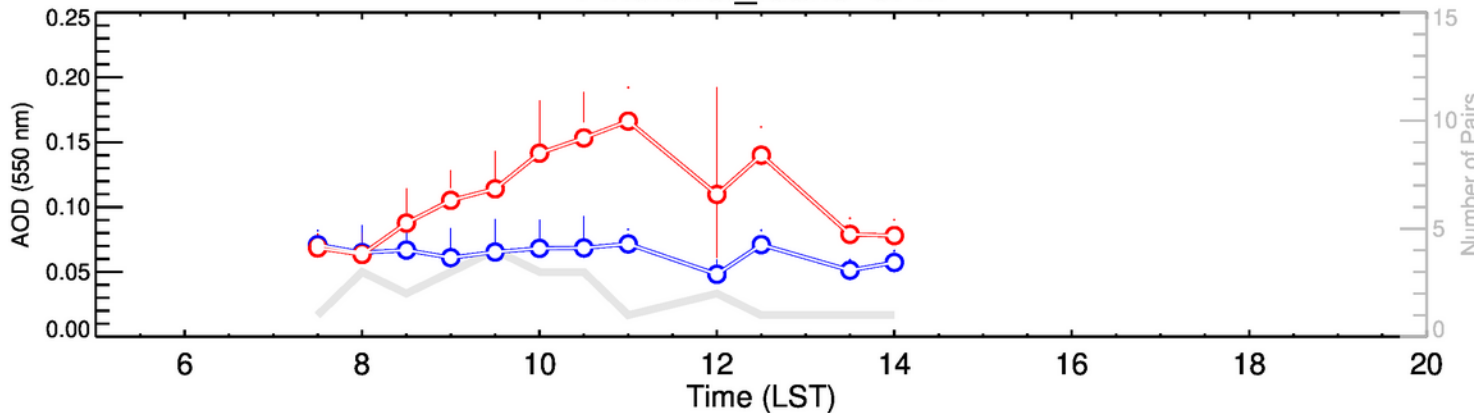

### PNNL-AMJ

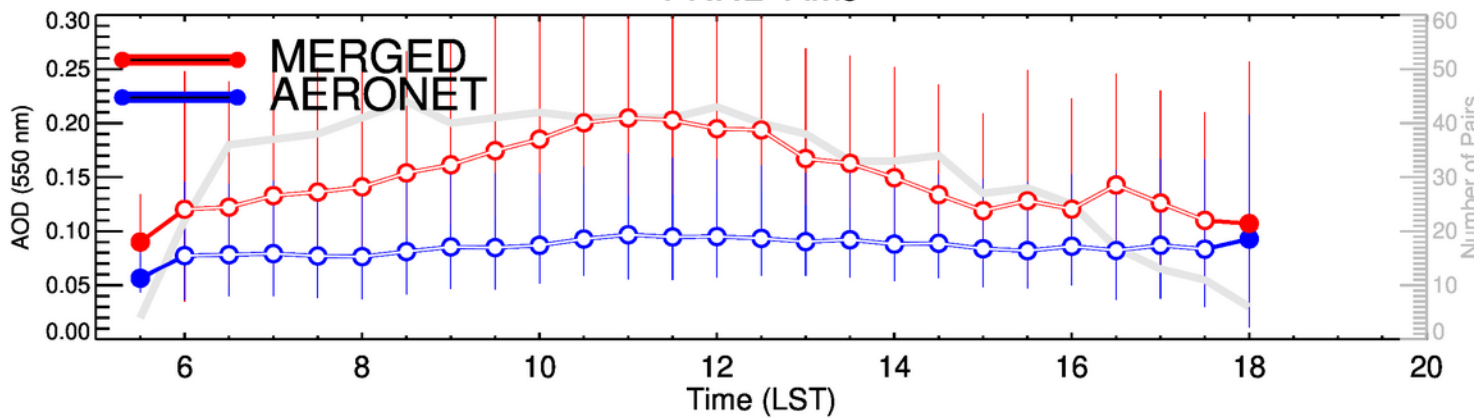

### PNNL-JAS

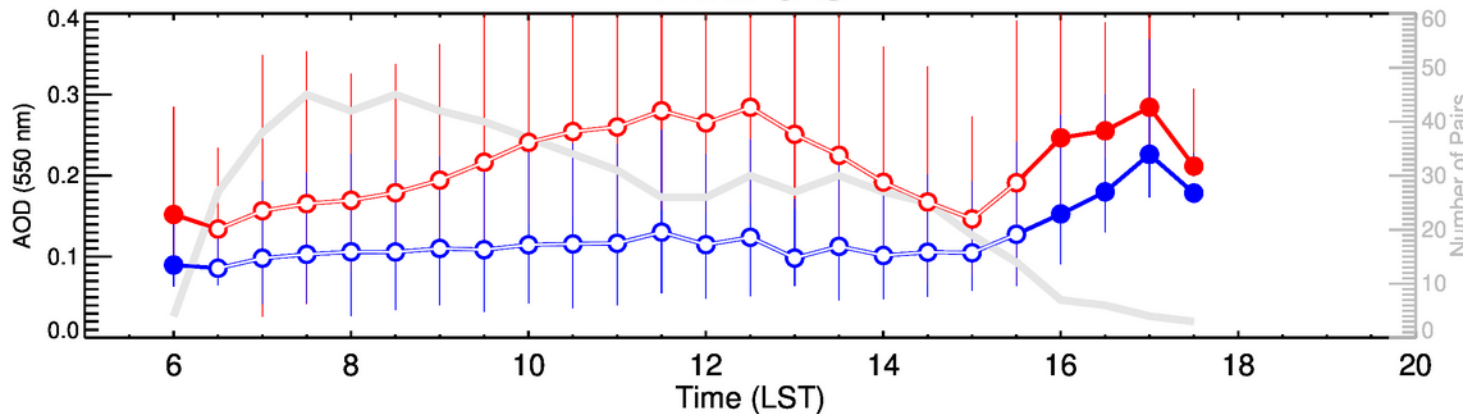

### PNNL-OND

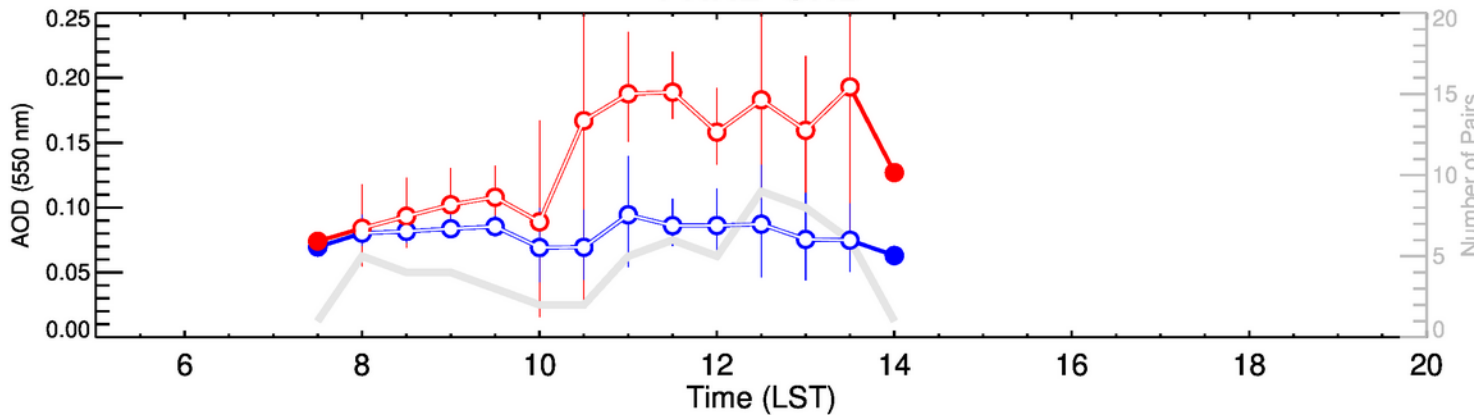

### PNNL-JFM

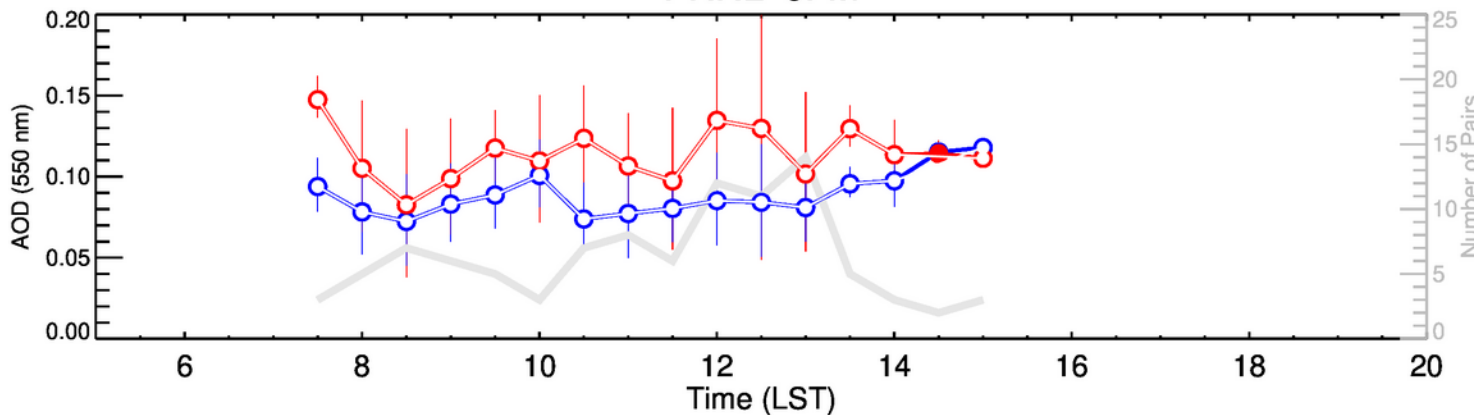

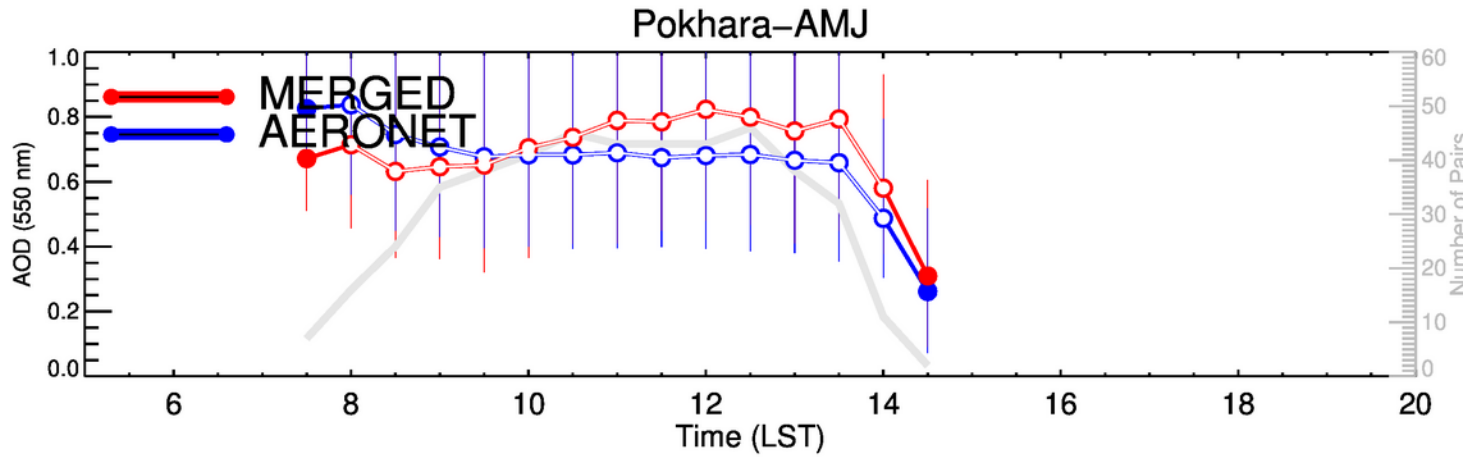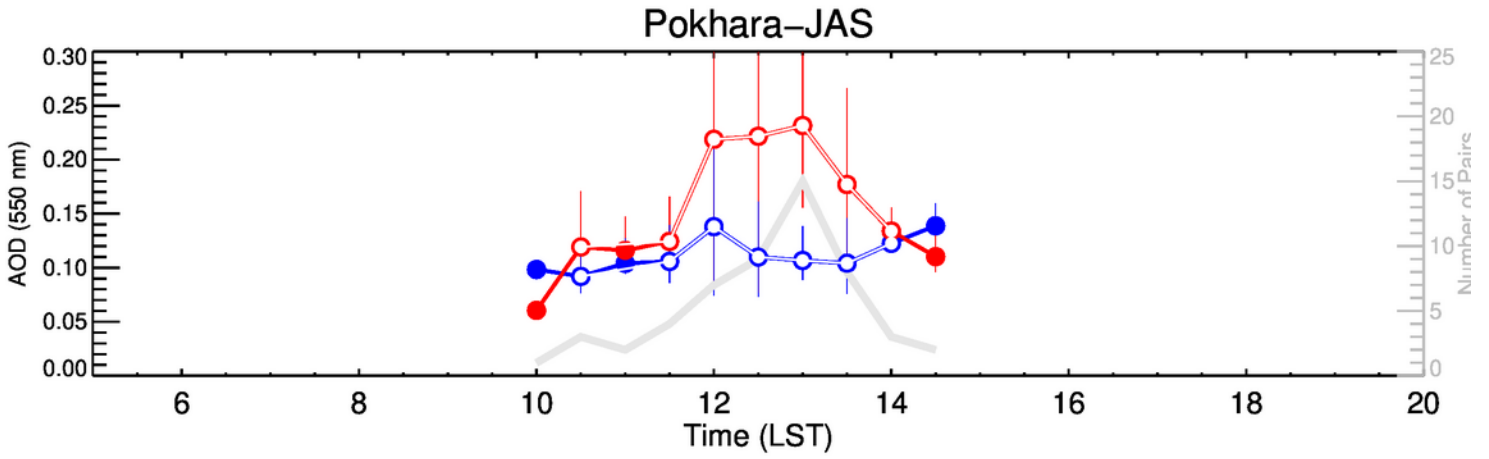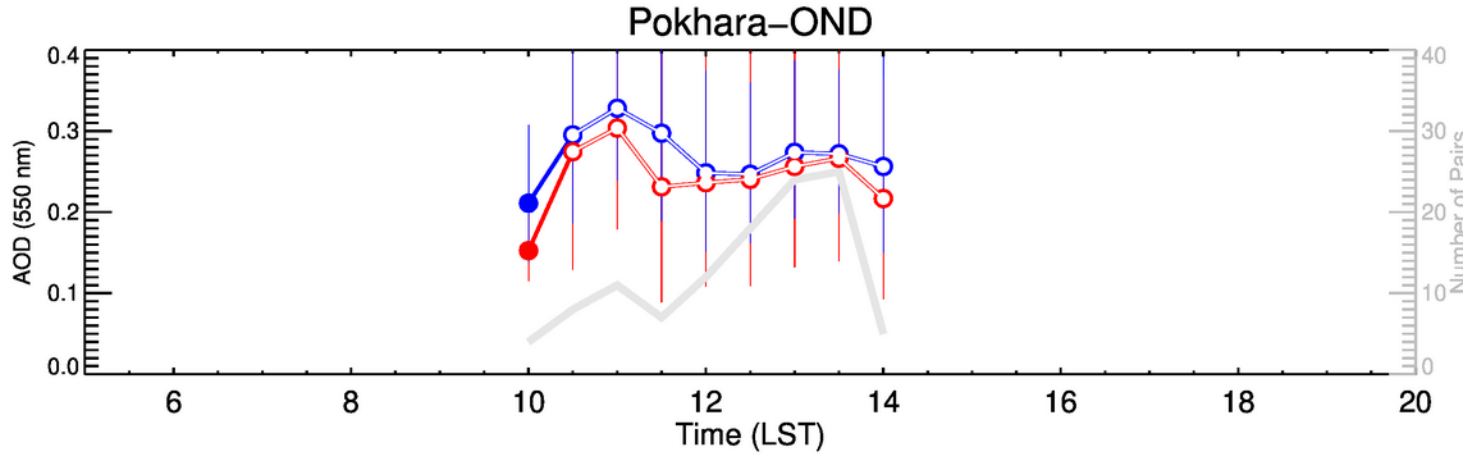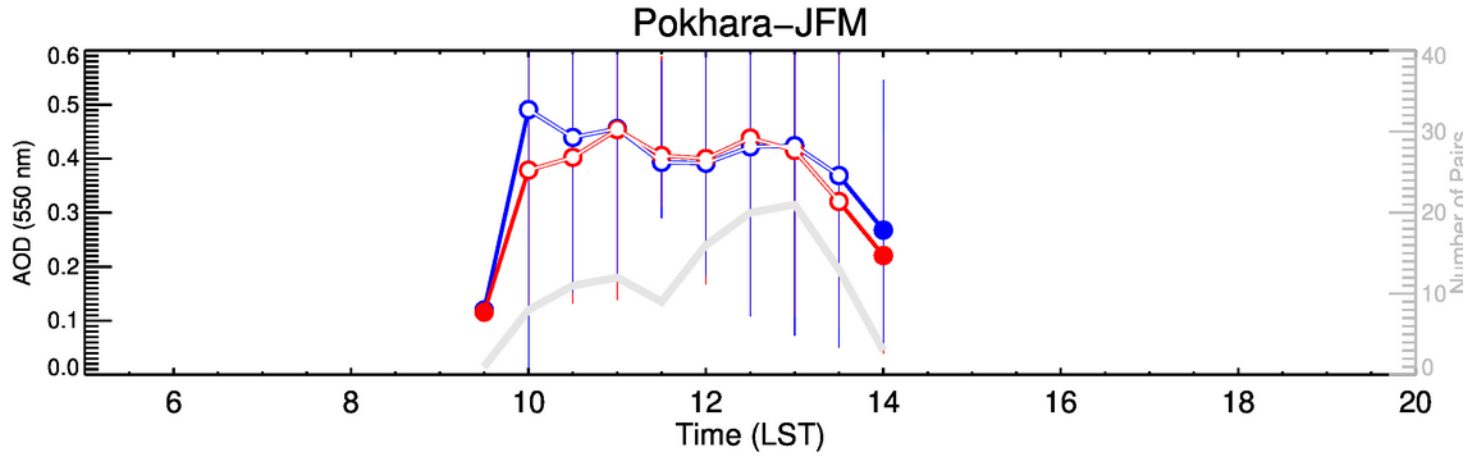

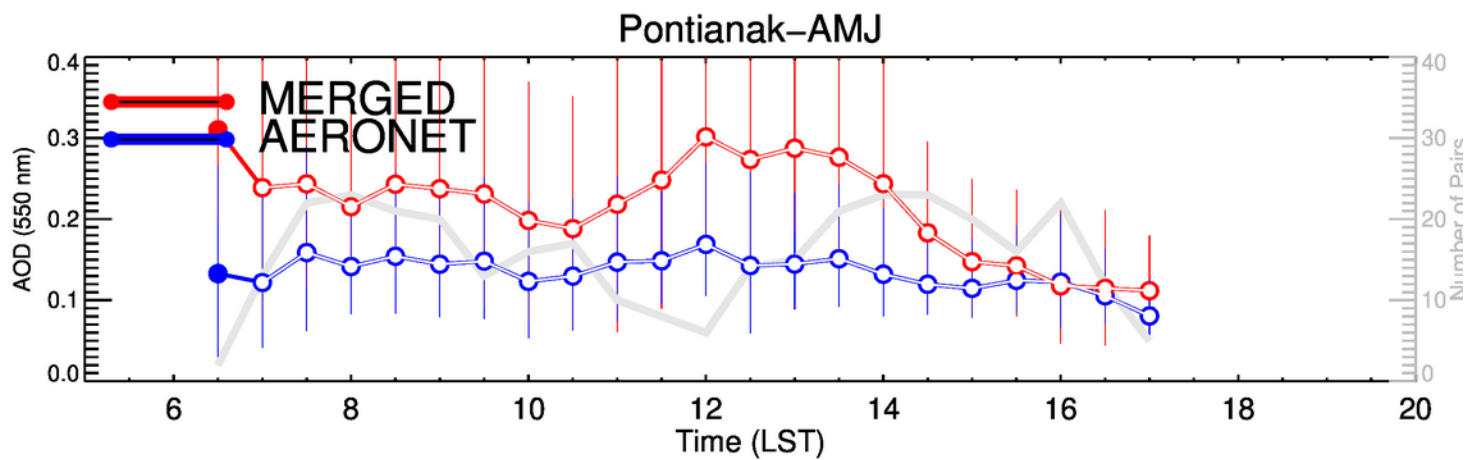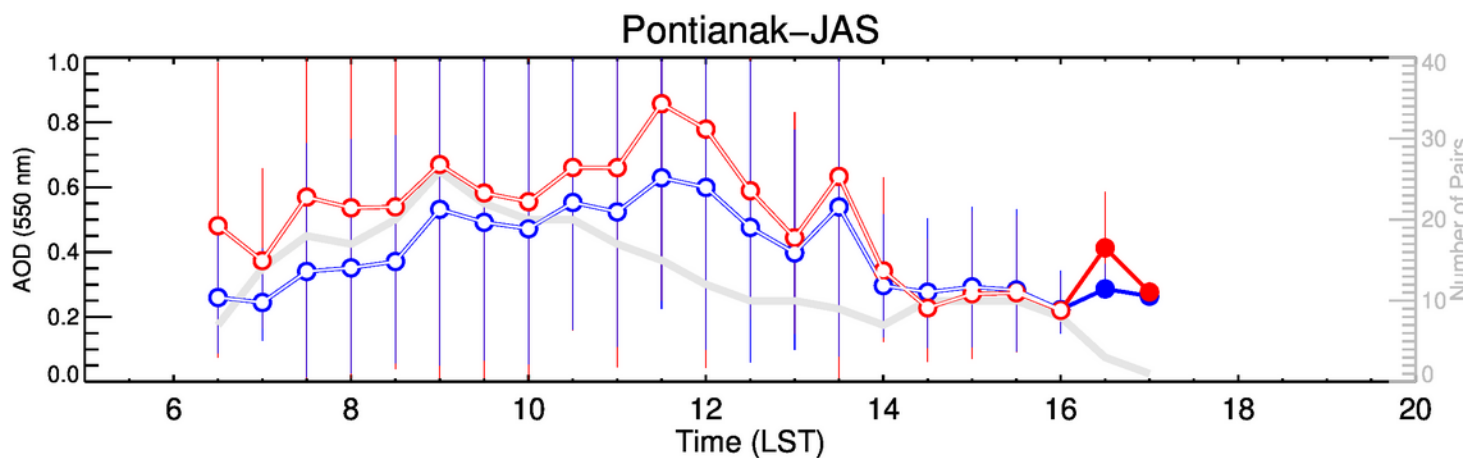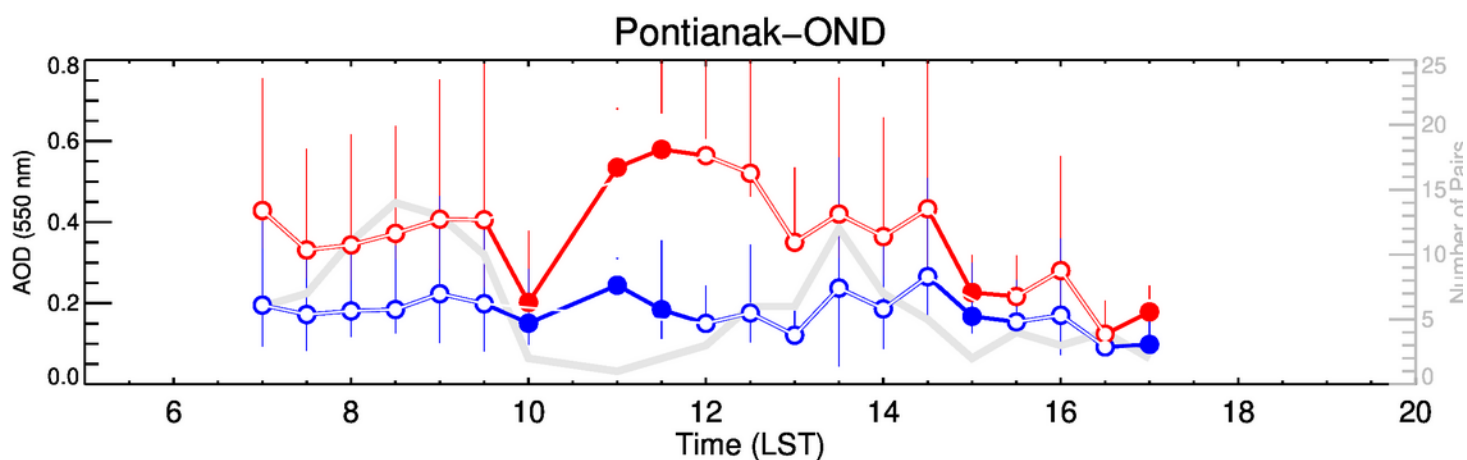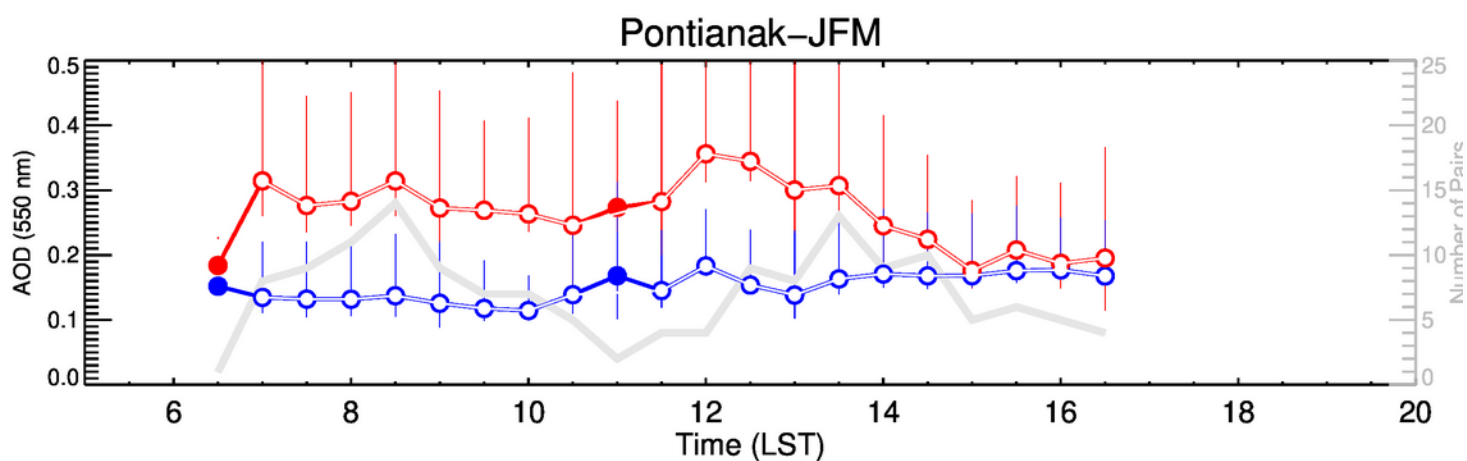



### Poprad-Ganovce-AMJ

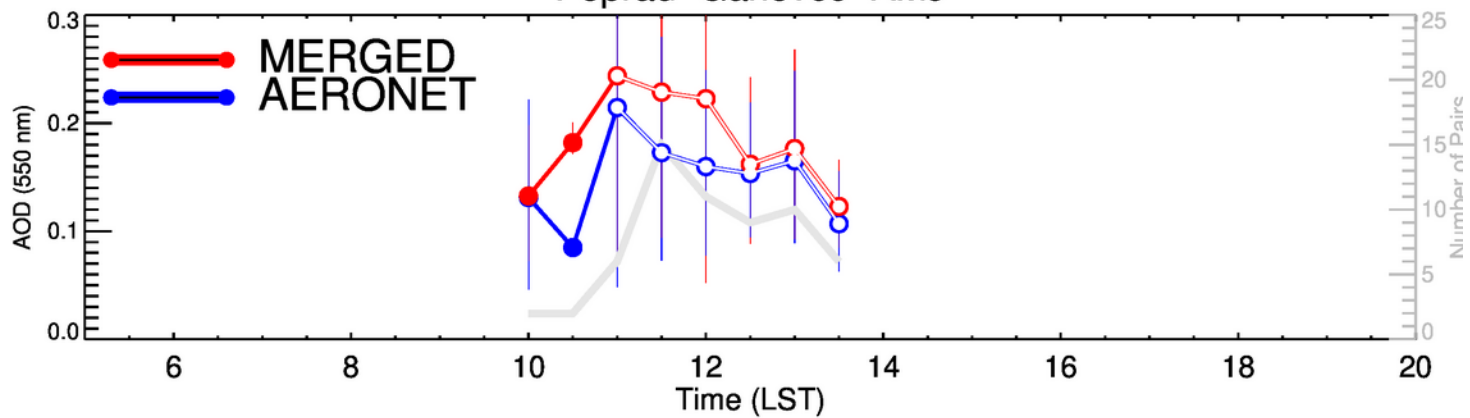

### Poprad-Ganovce-JAS

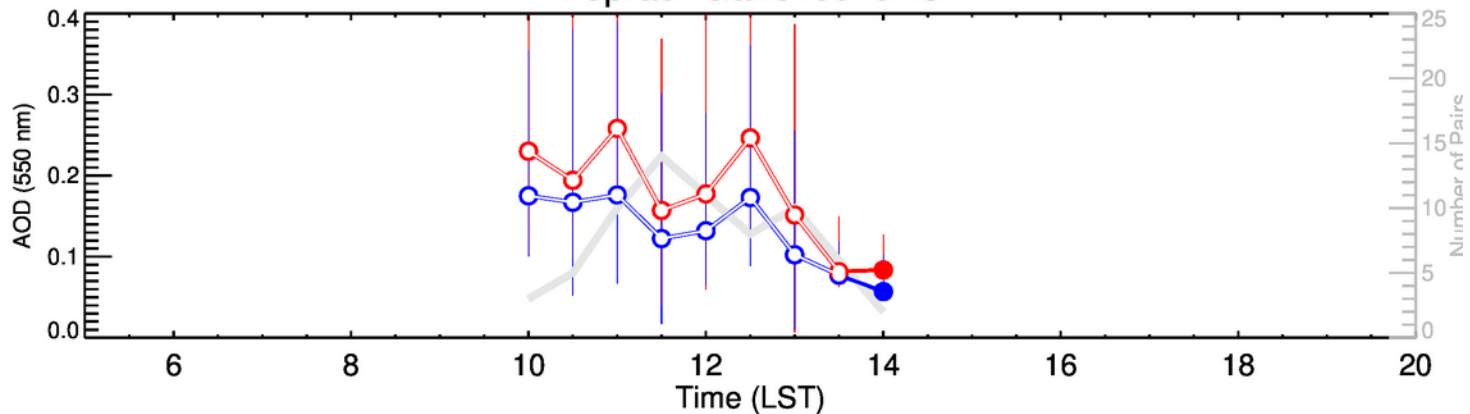

### Poprad-Ganovce-OND

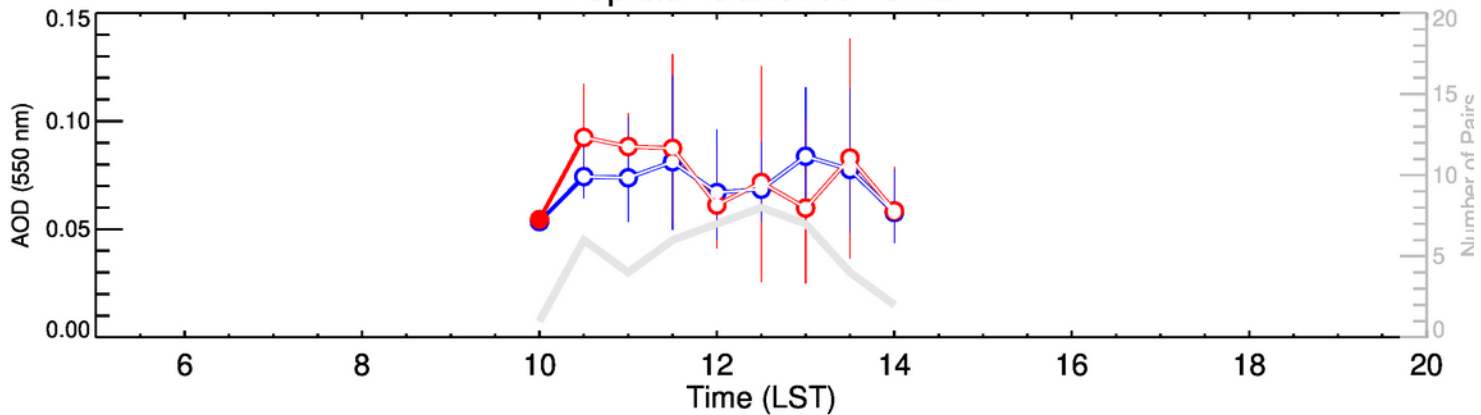

### Raciborz-AMJ

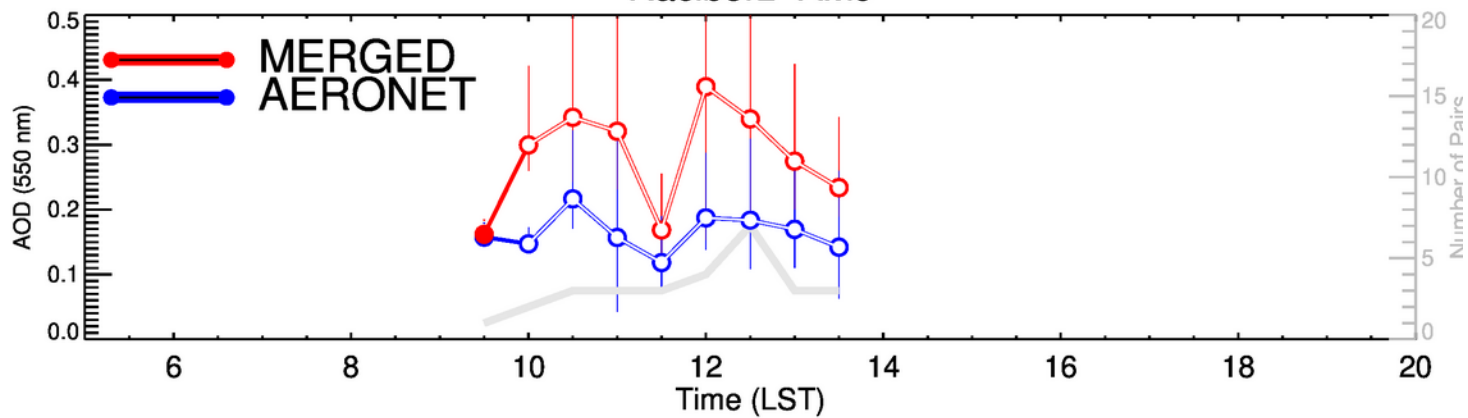

### Raciborz-JAS

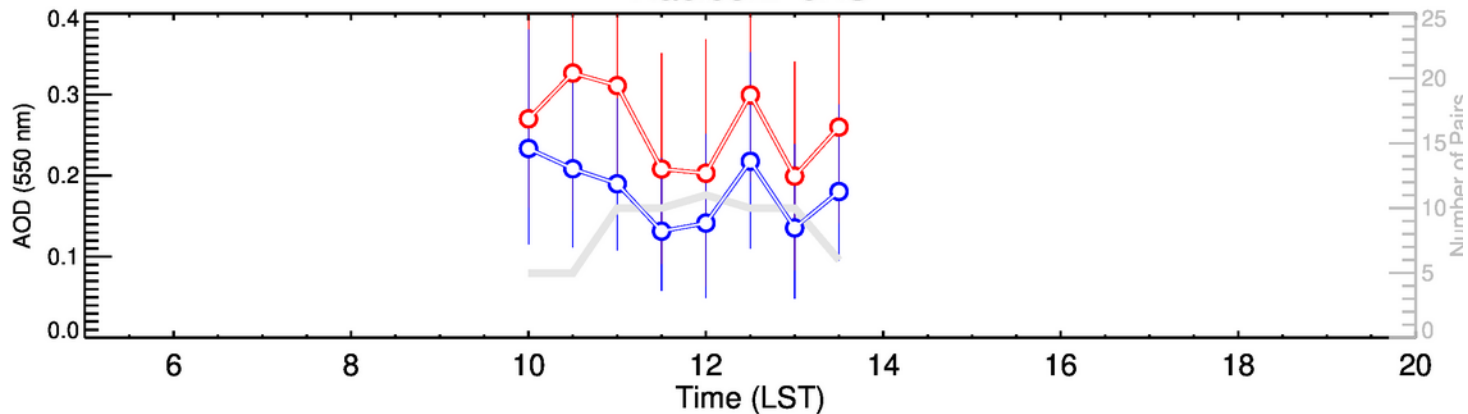

### Raciborz-OND

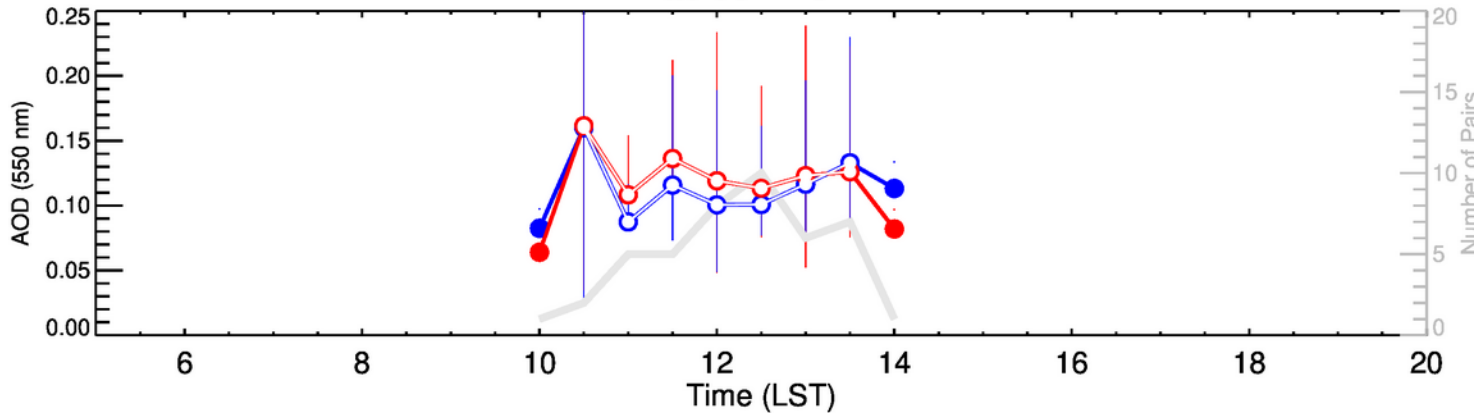

### Raciborz-JFM

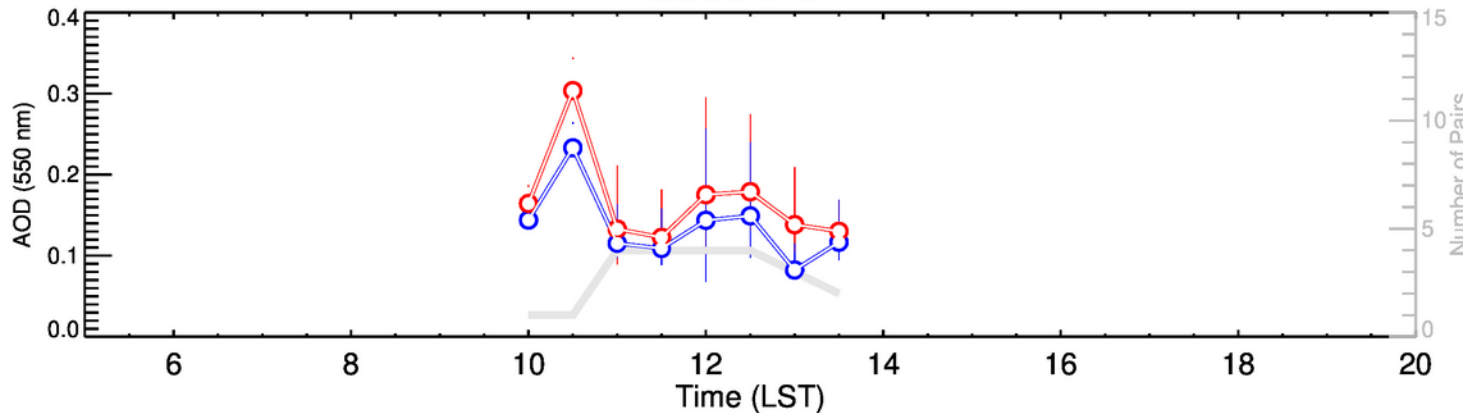

### Ragged\_Point-AMJ

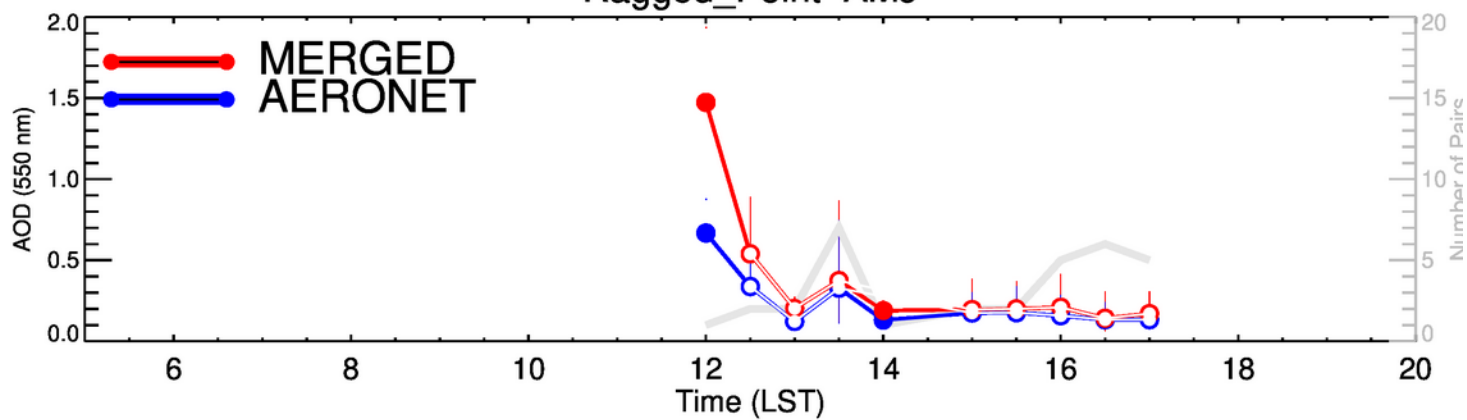

### Ragged\_Point-JAS

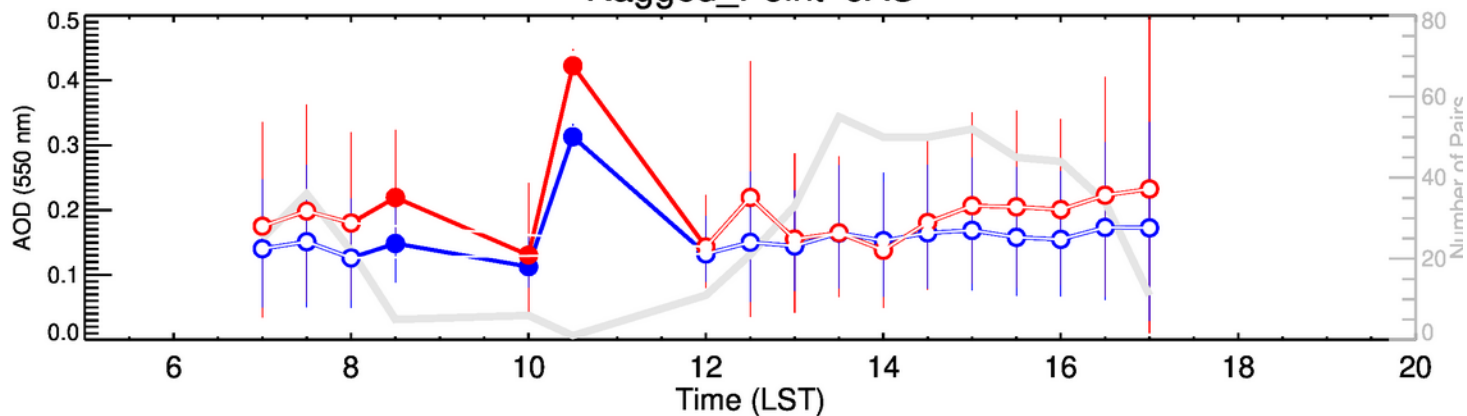

### Ragged\_Point-OND

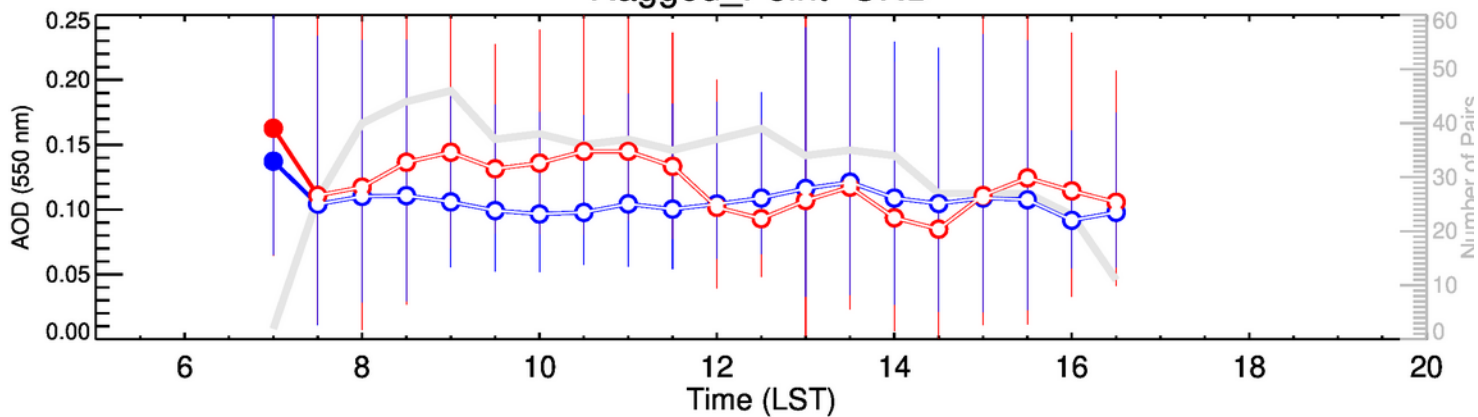

### Ragged\_Point-JFM

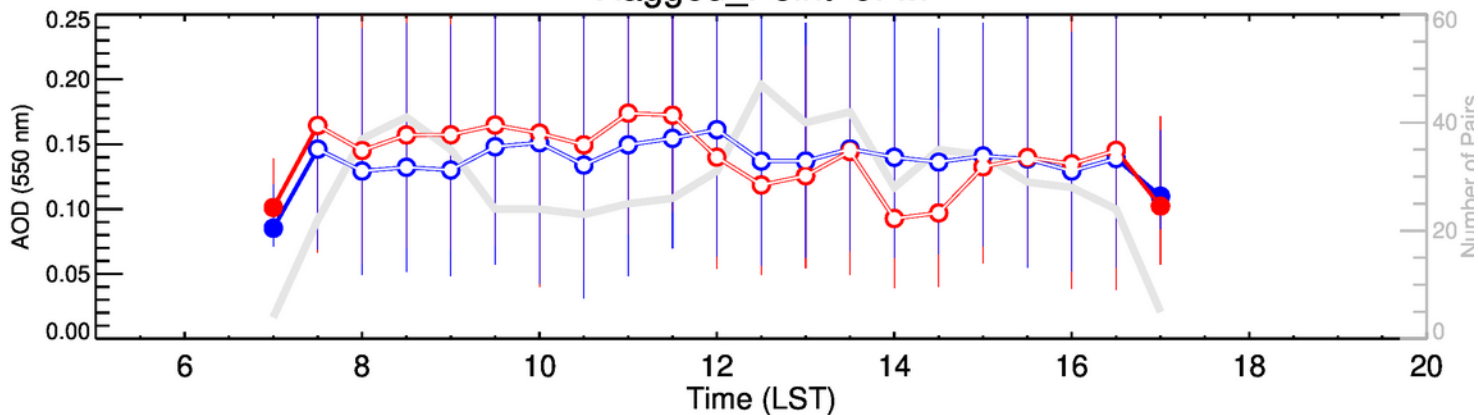

### Rio\_Branco-AMJ

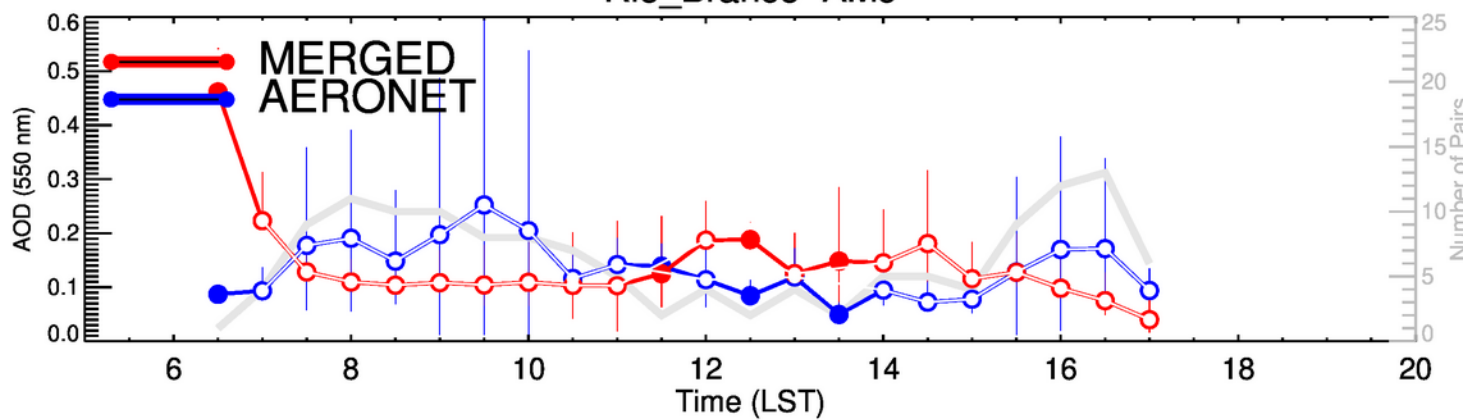

### Rio\_Branco-JAS

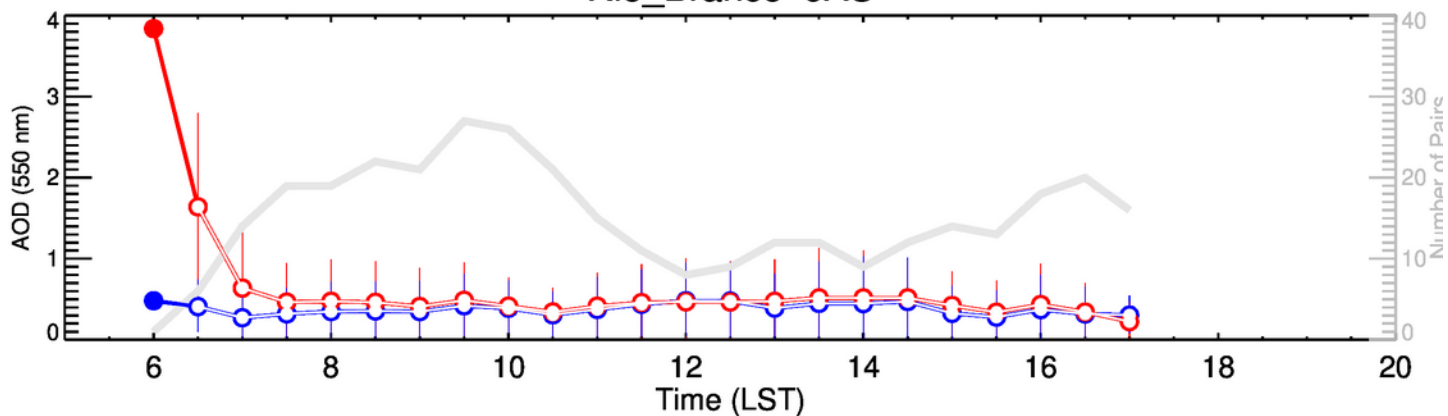

### Rio\_Branco-OND

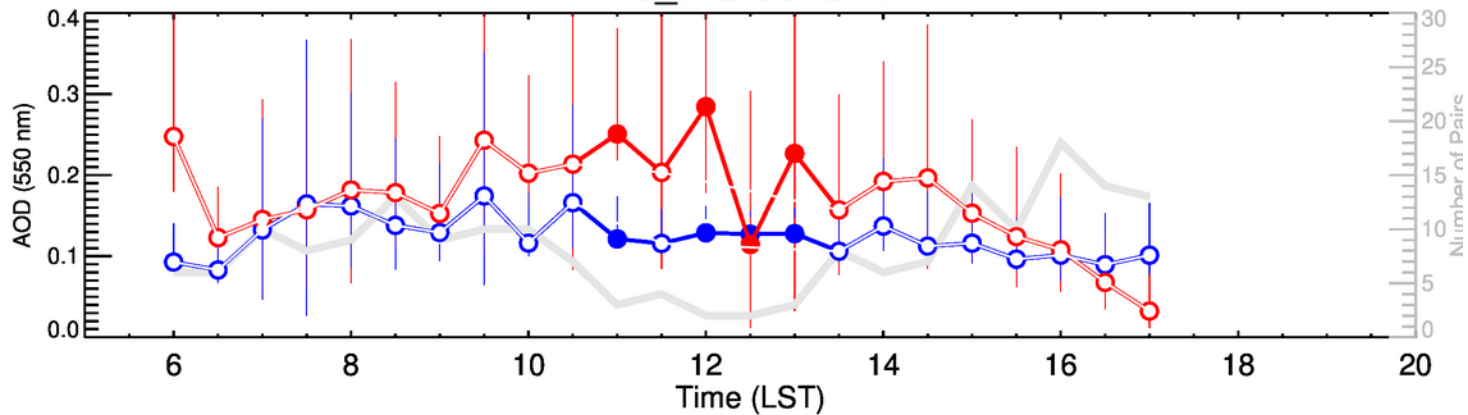

### Rio\_Branco-JFM

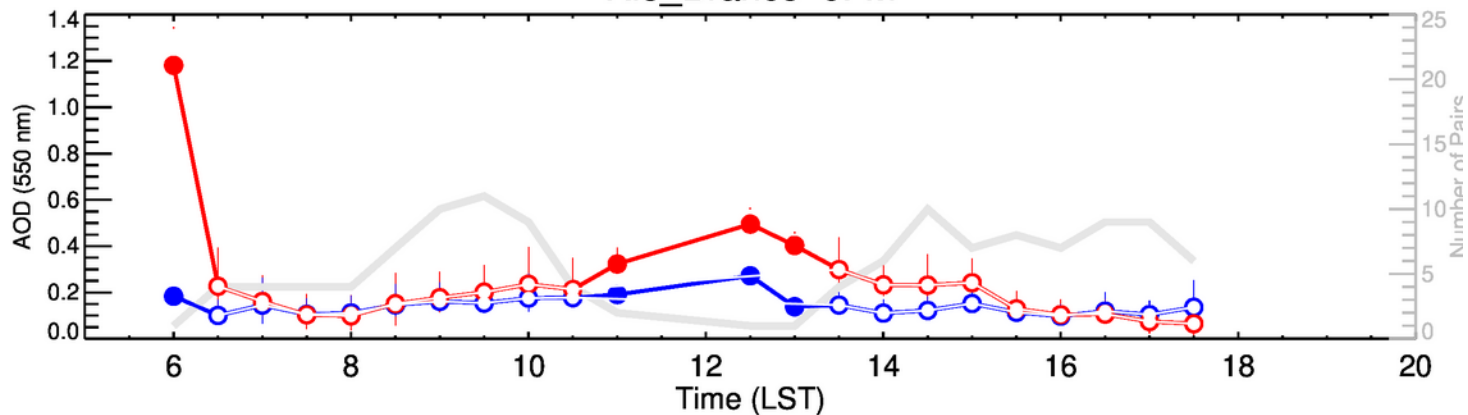

### Rome\_La\_Sapienza-AMJ

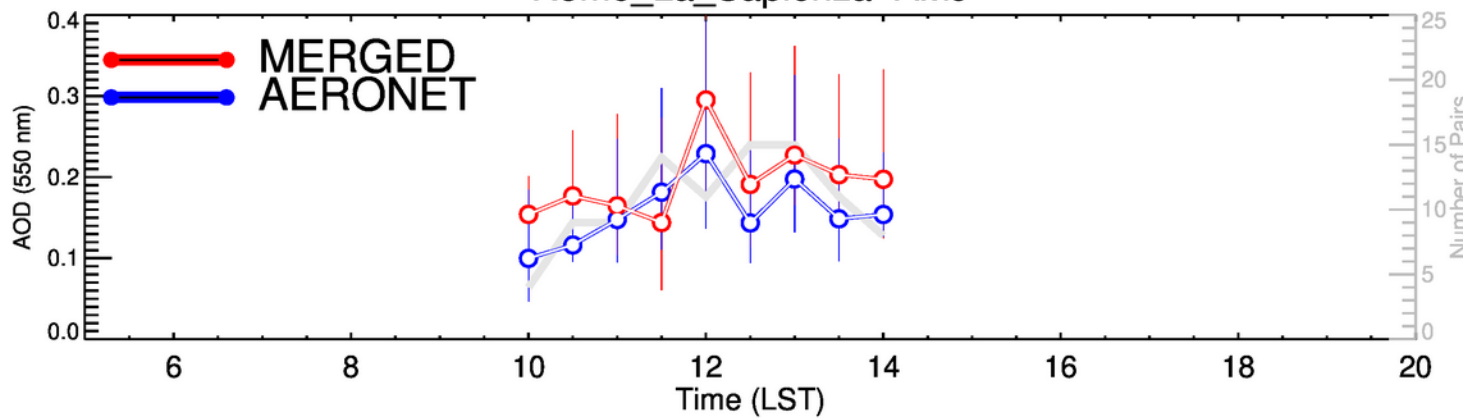

### Rome\_La\_Sapienza-JAS

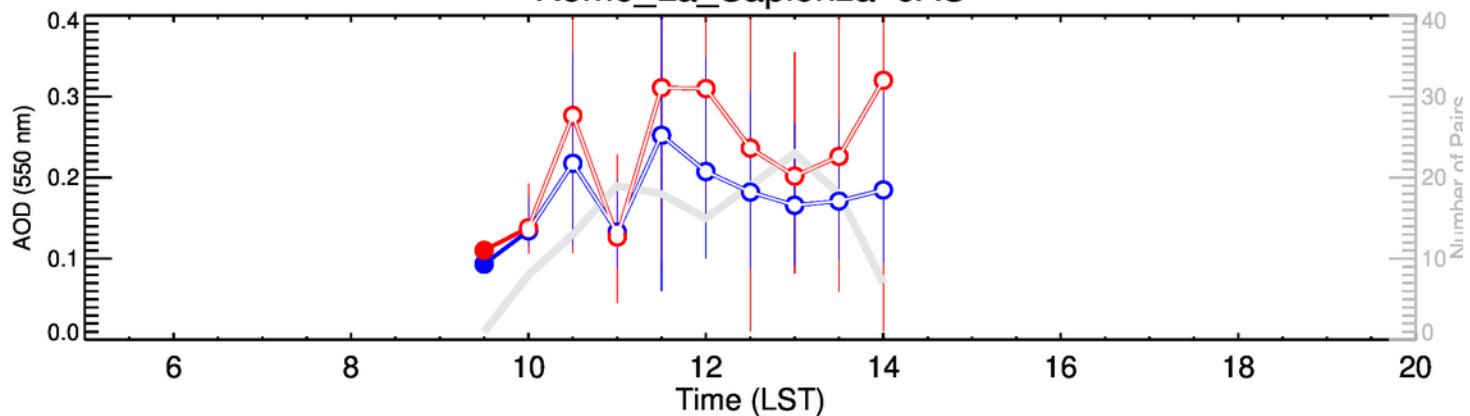

### Rome\_La\_Sapienza-OND

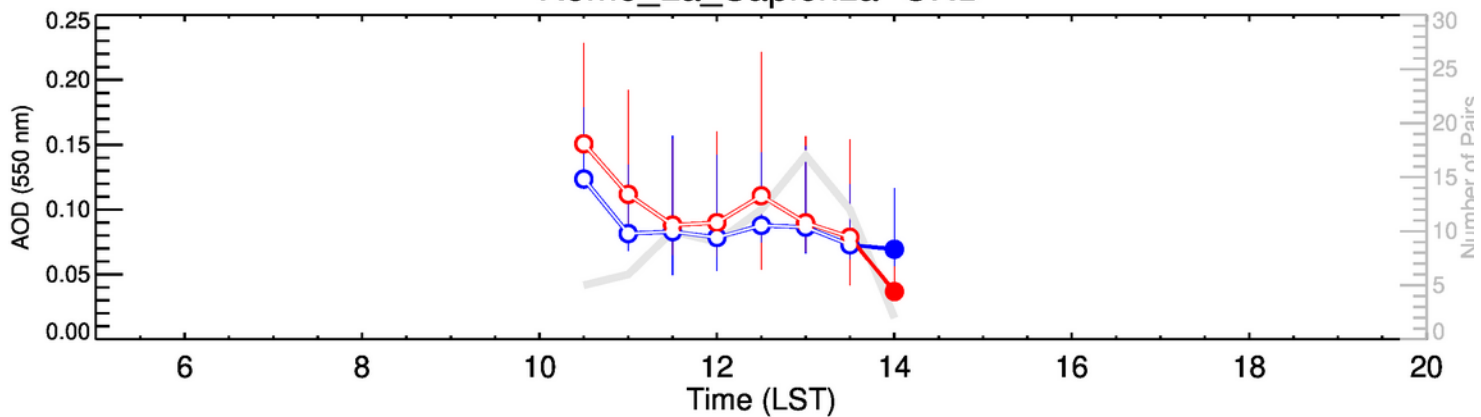

### Rome\_La\_Sapienza-JFM

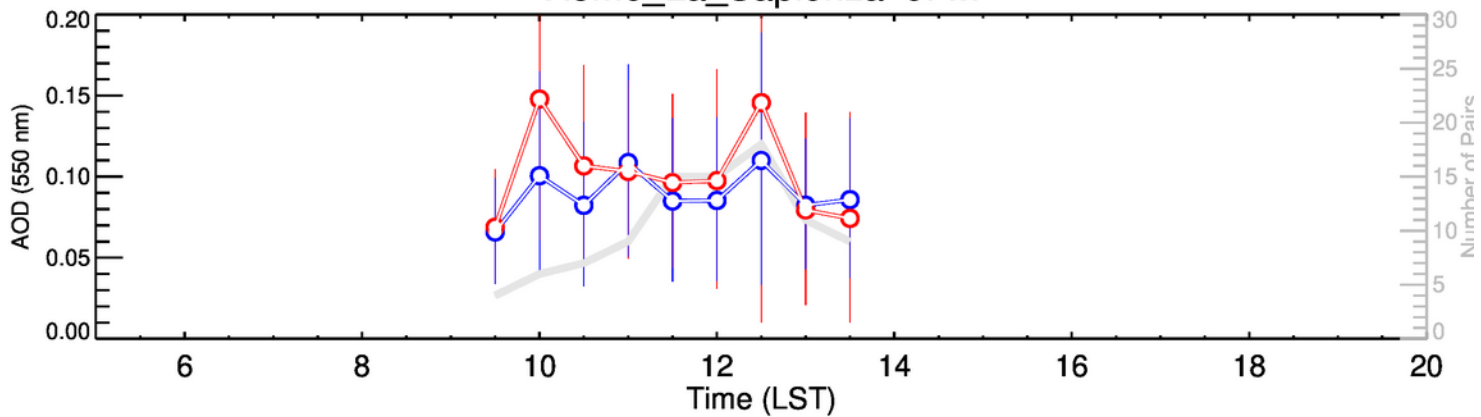

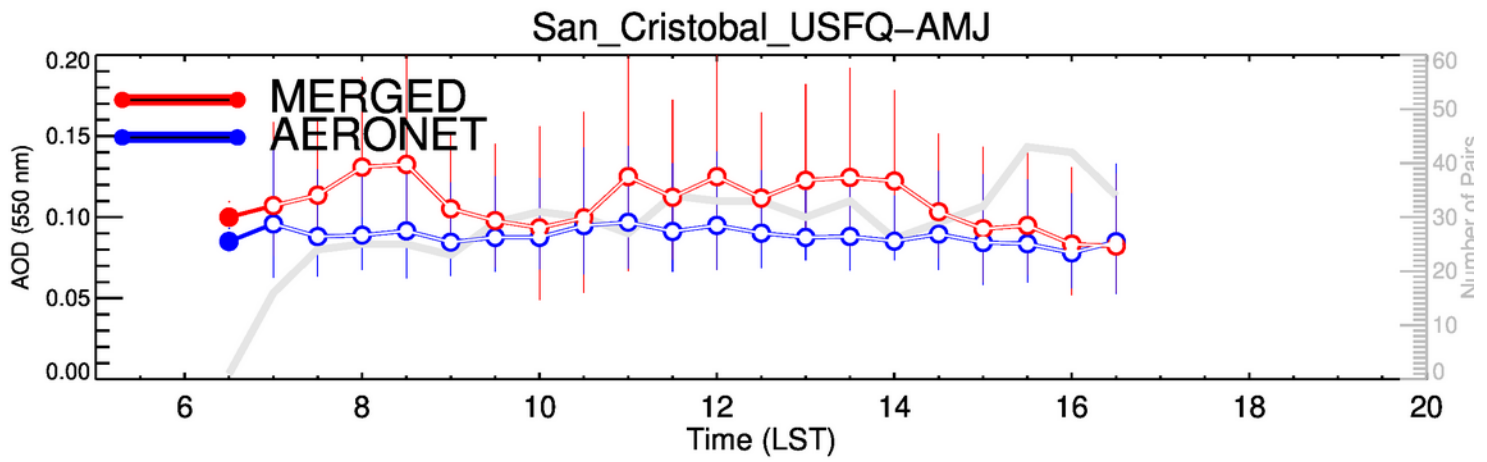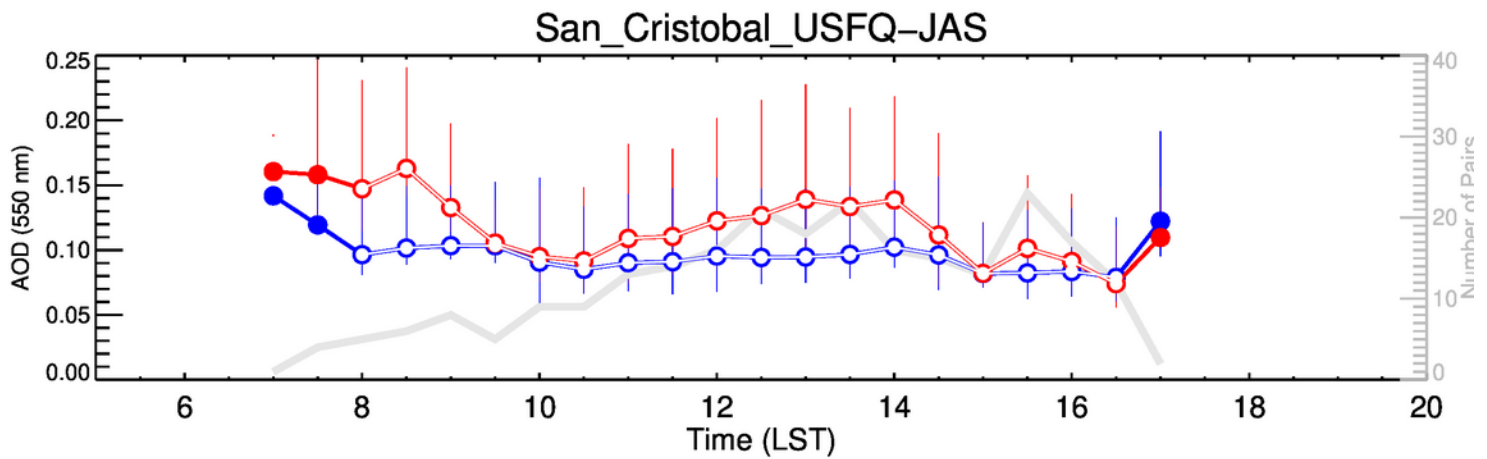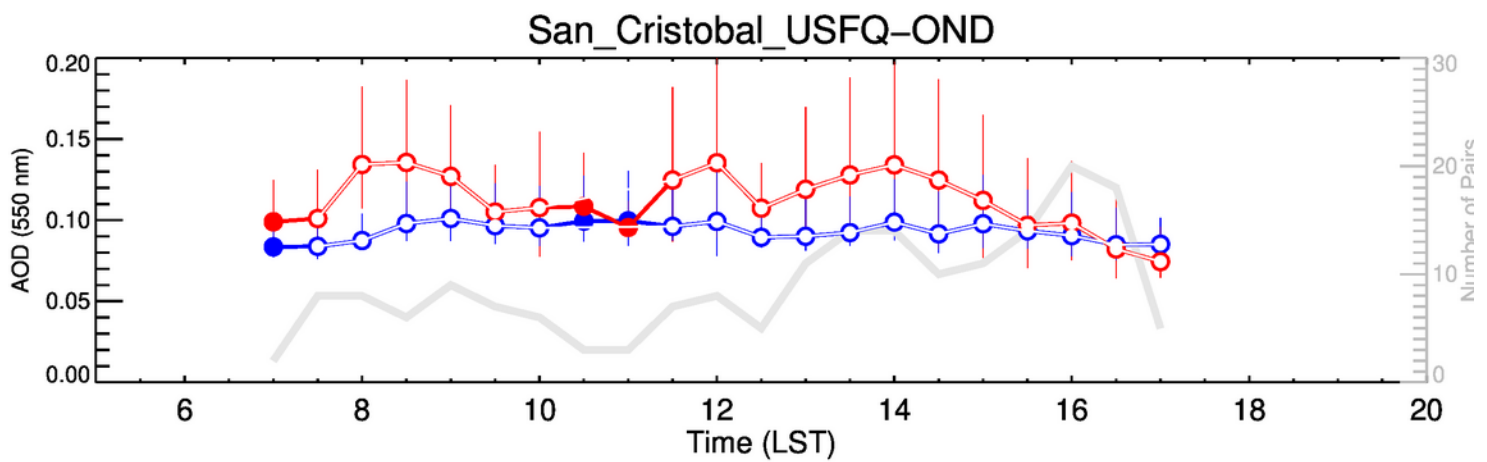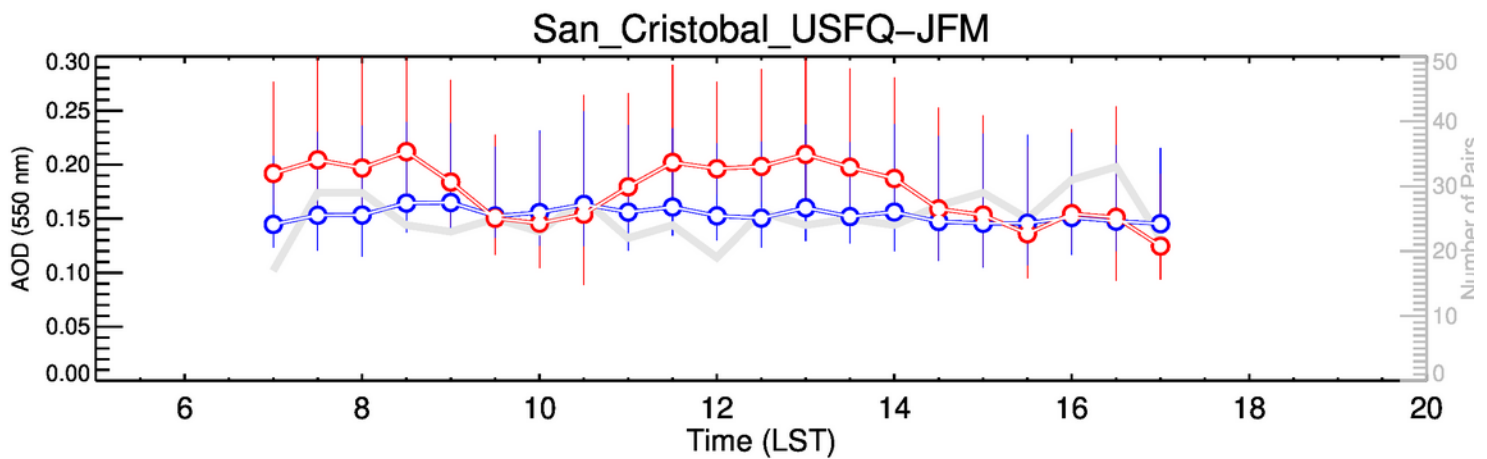

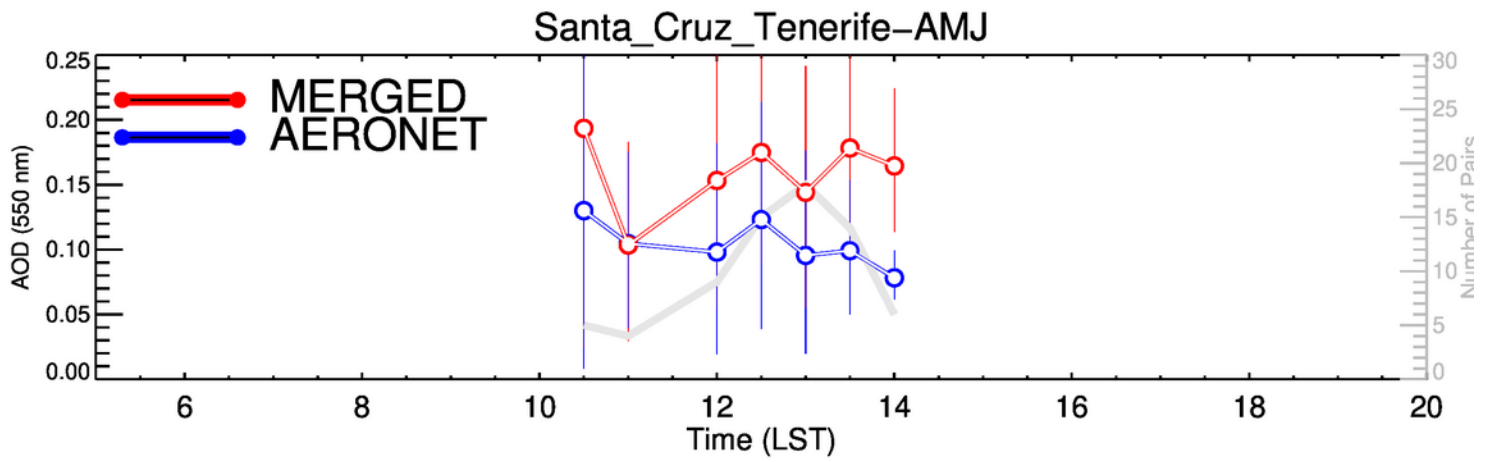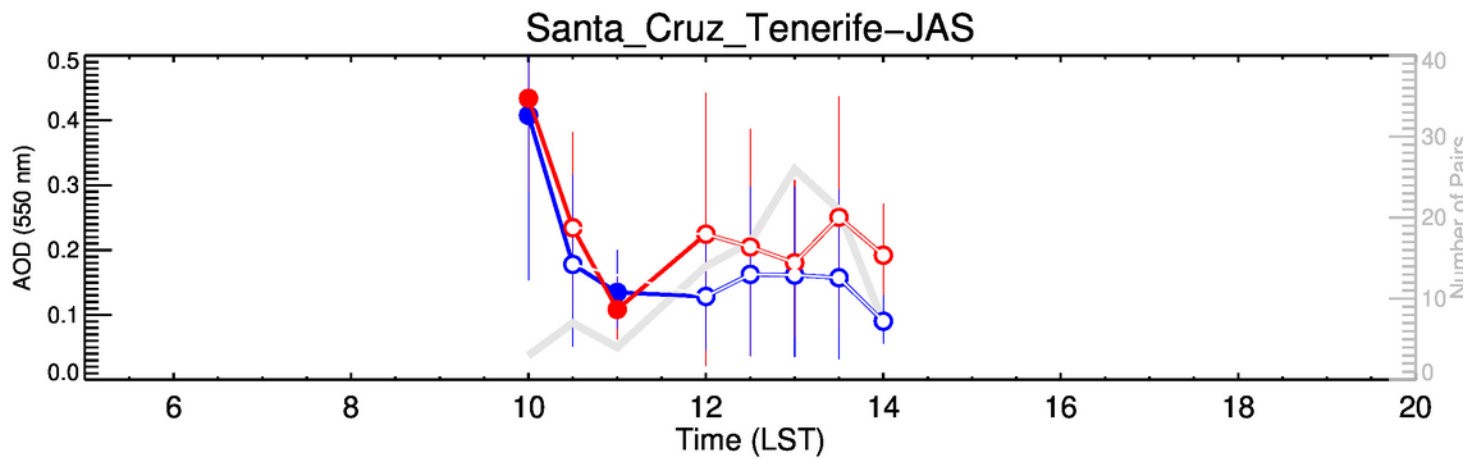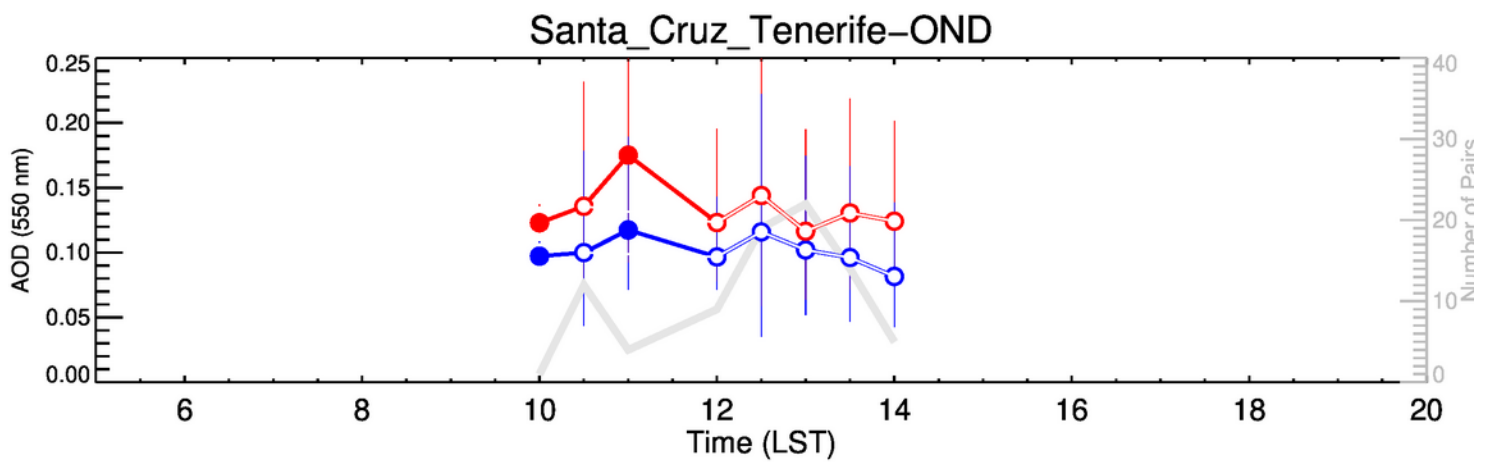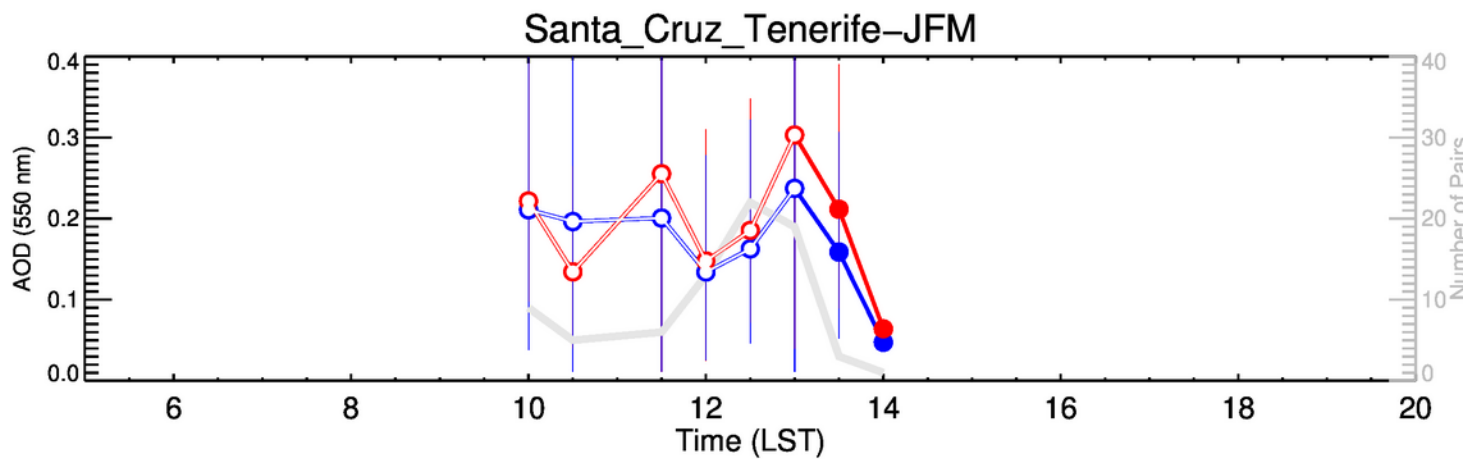

### SANTA\_CRUZ\_UTEPSA-AMJ

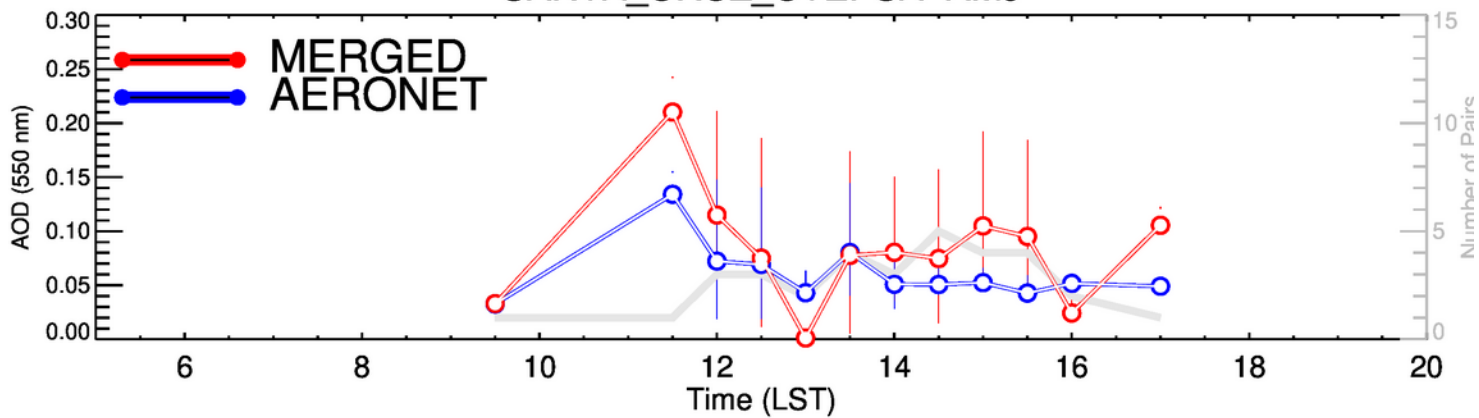

### SANTA\_CRUZ\_UTEPSA-JAS

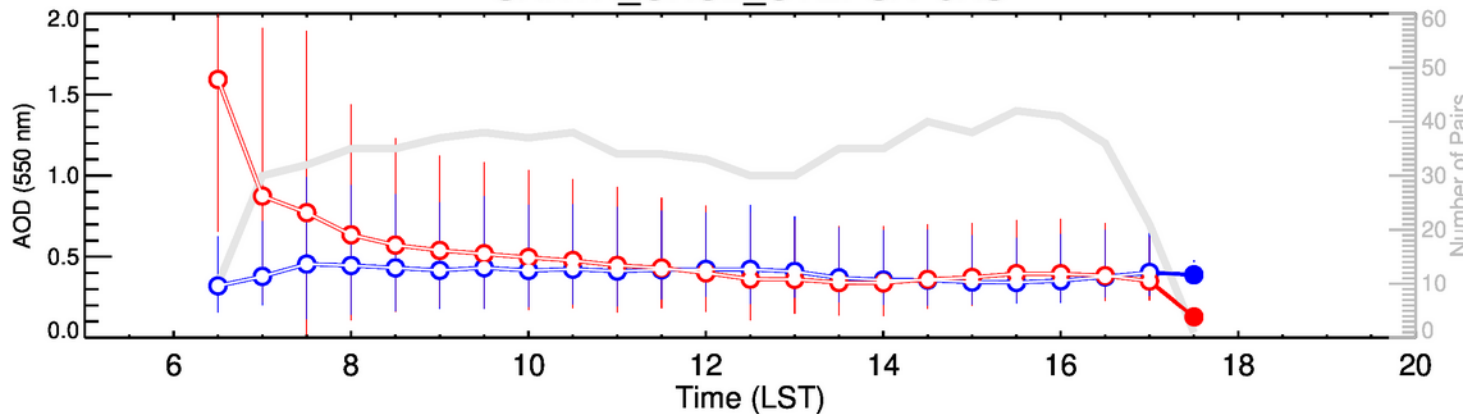

### SANTA\_CRUZ\_UTEPSA-OND

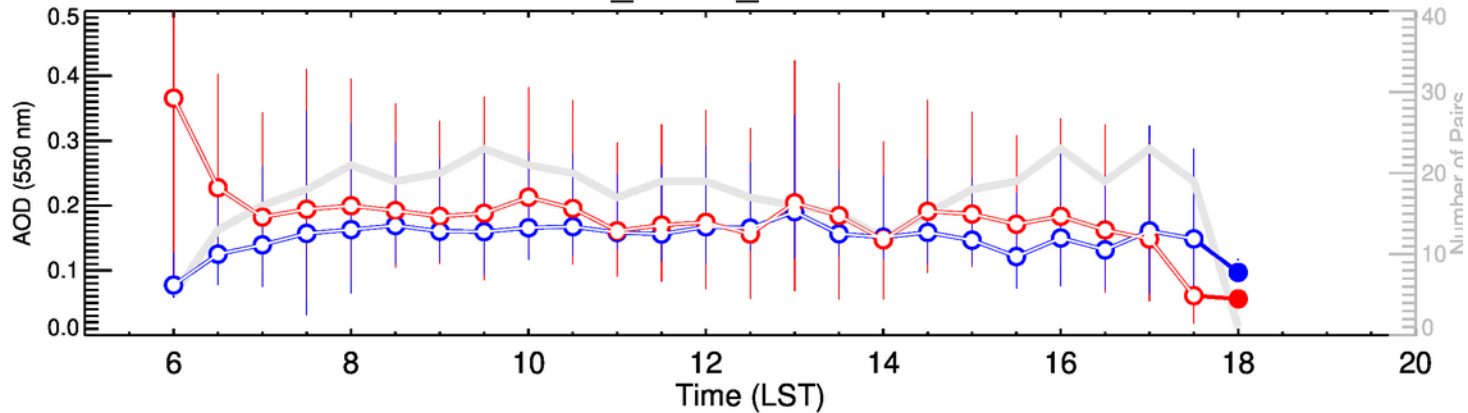

### SANTA\_CRUZ\_UTEPSA-JFM

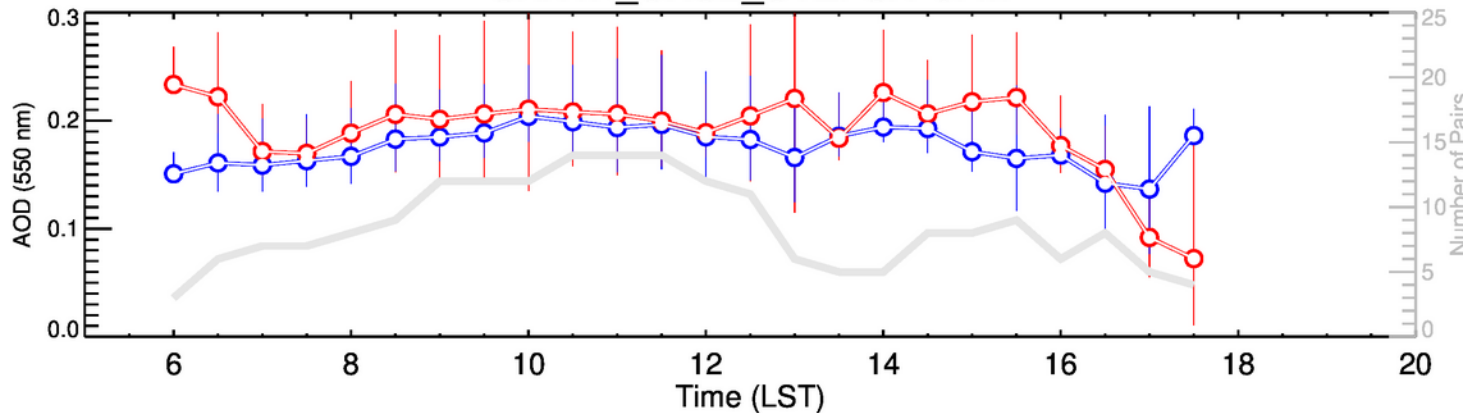



### Santa\_Monica\_Colg-AMJ

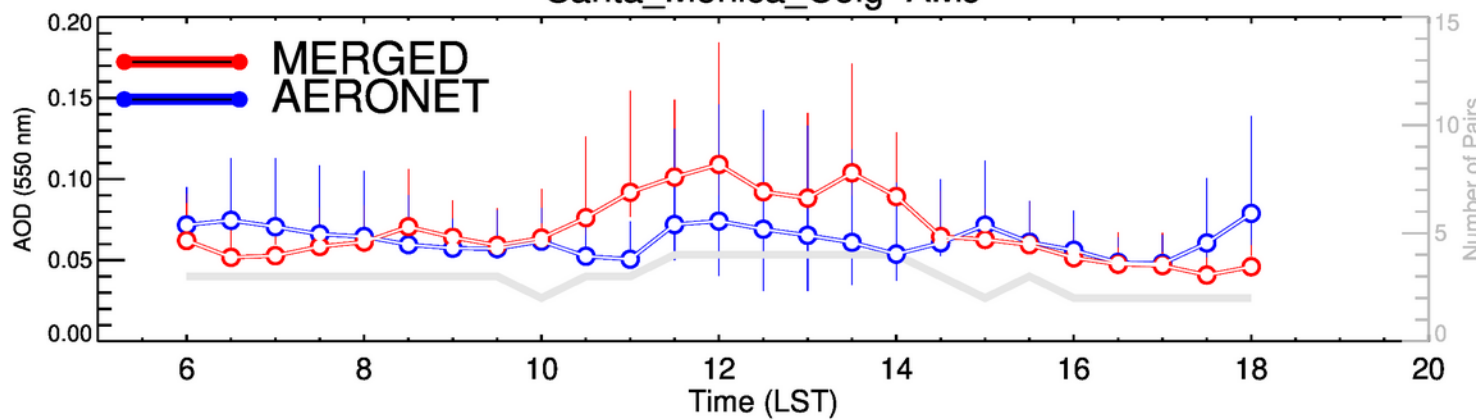

### Santa\_Monica\_Colg-JAS

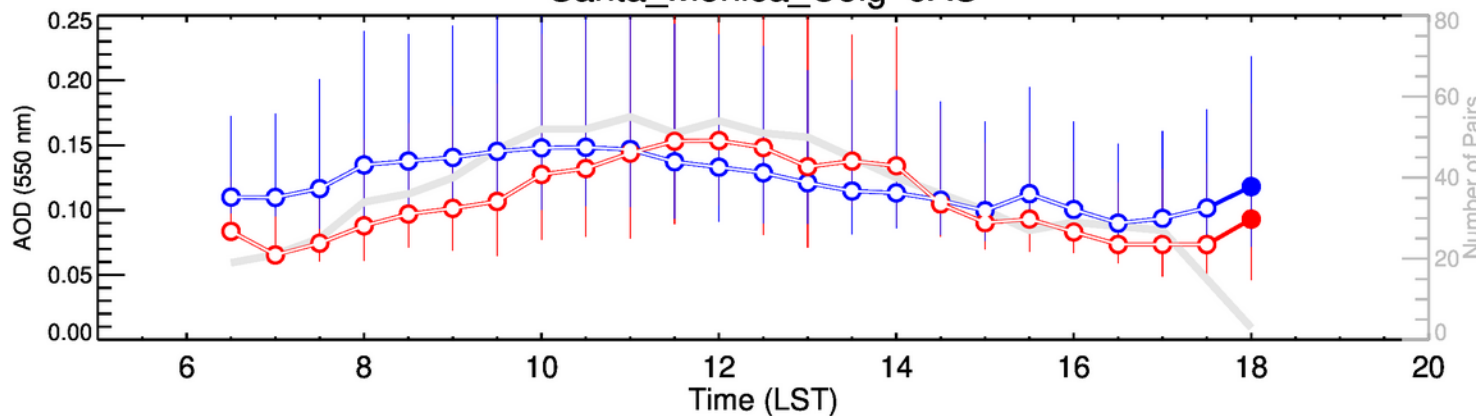

### Santa\_Monica\_Colg-OND

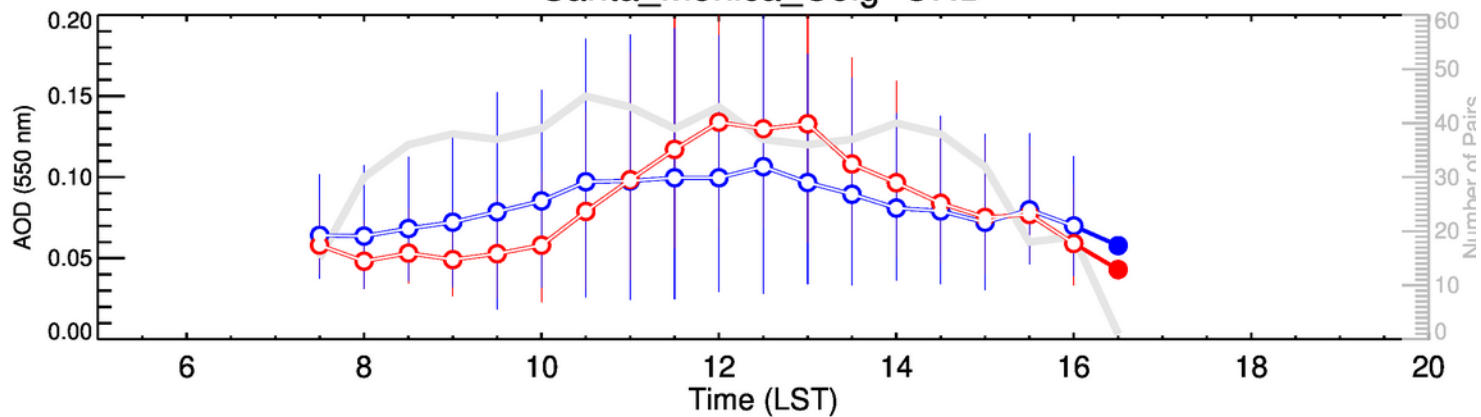

### Santa\_Monica\_Colg-JFM

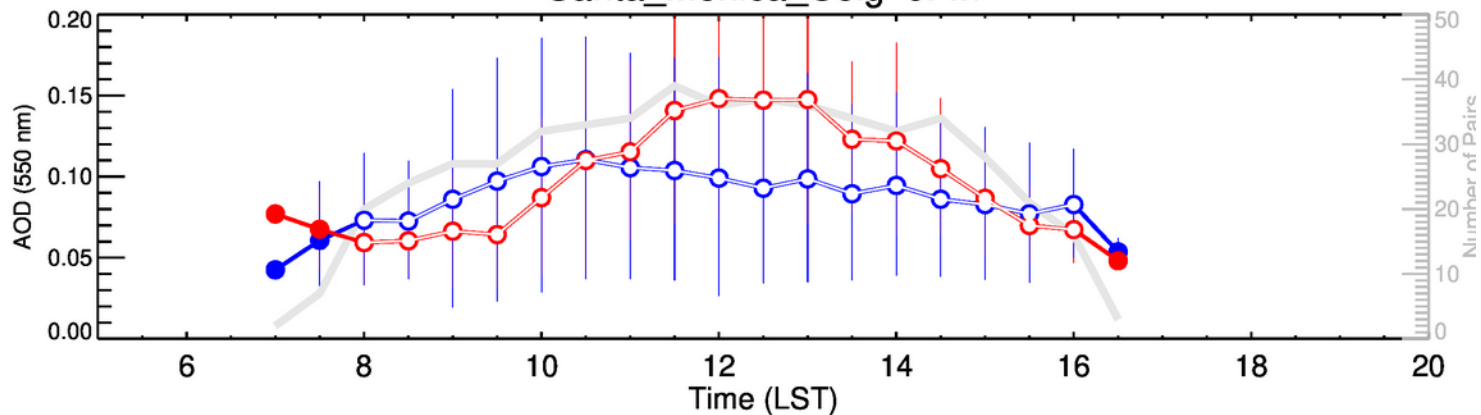

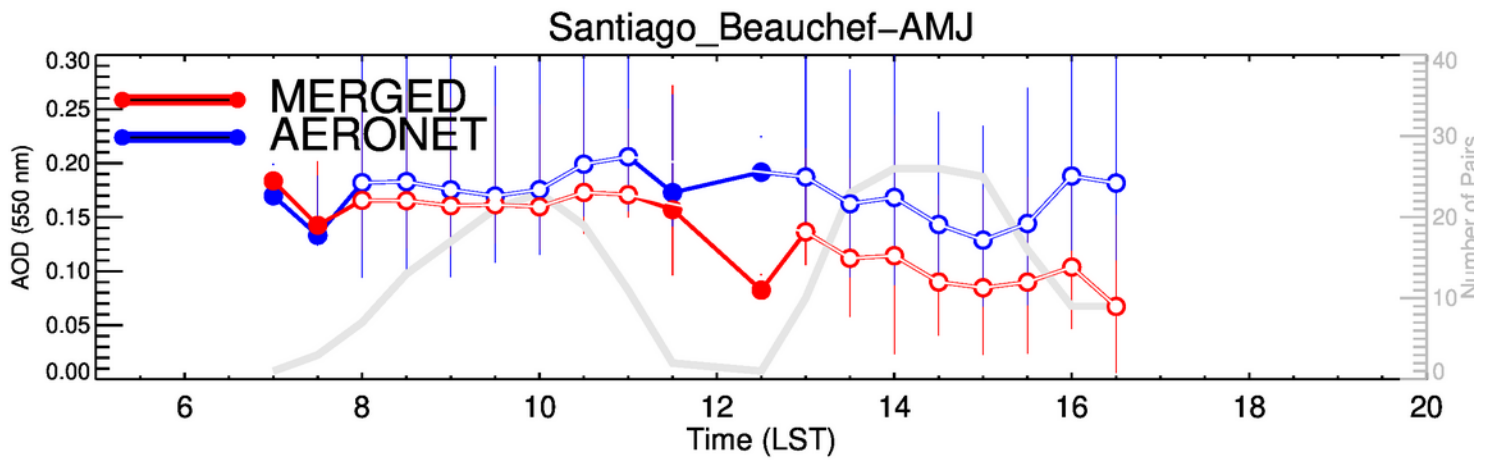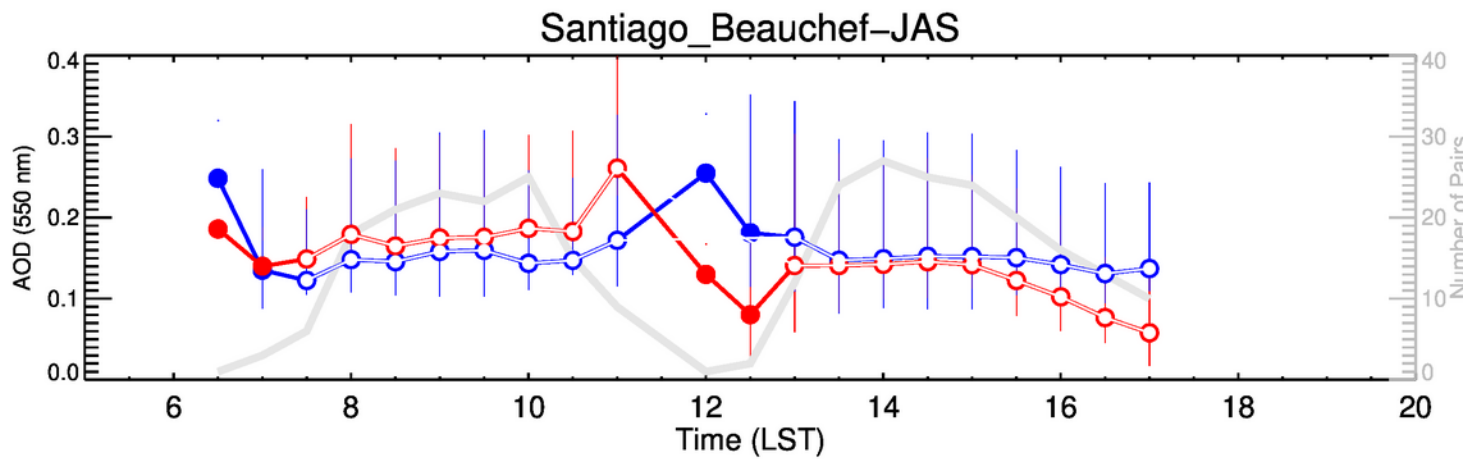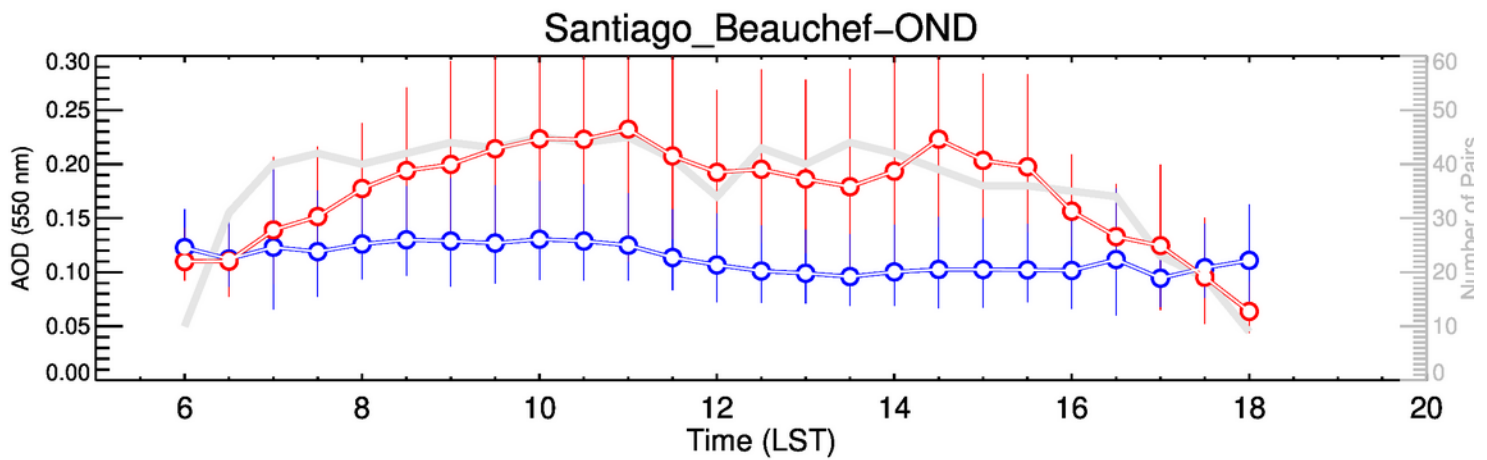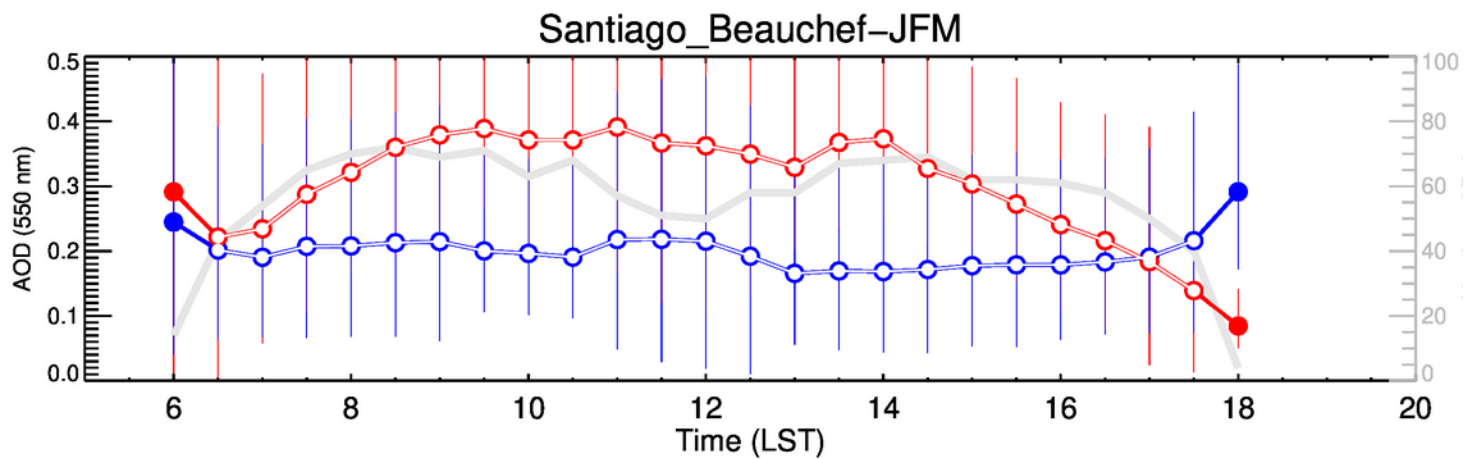

# Seoul\_SNU-AMJ

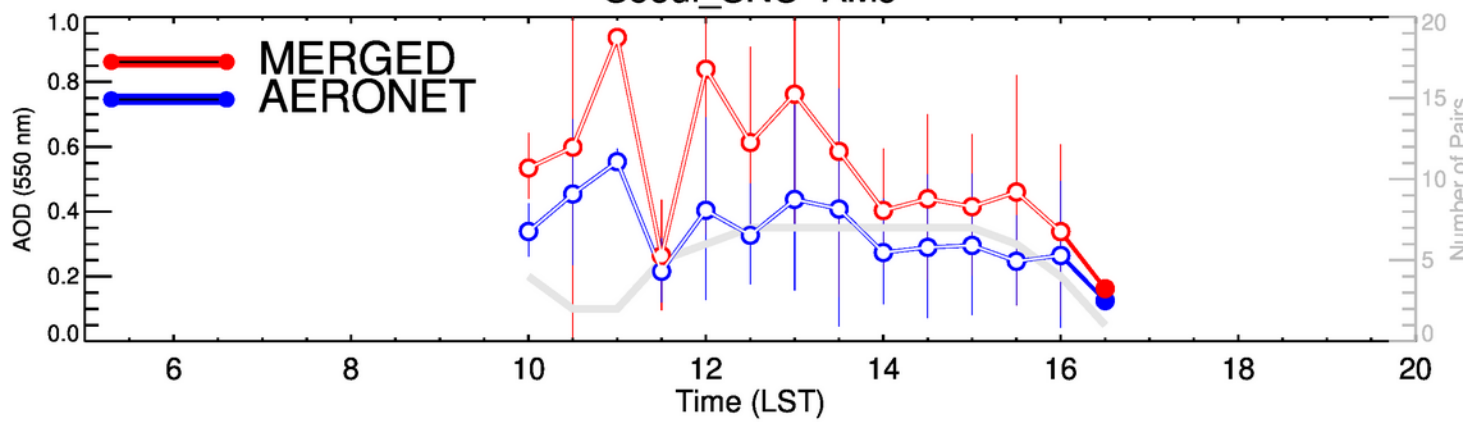

### Shirahama-AMJ

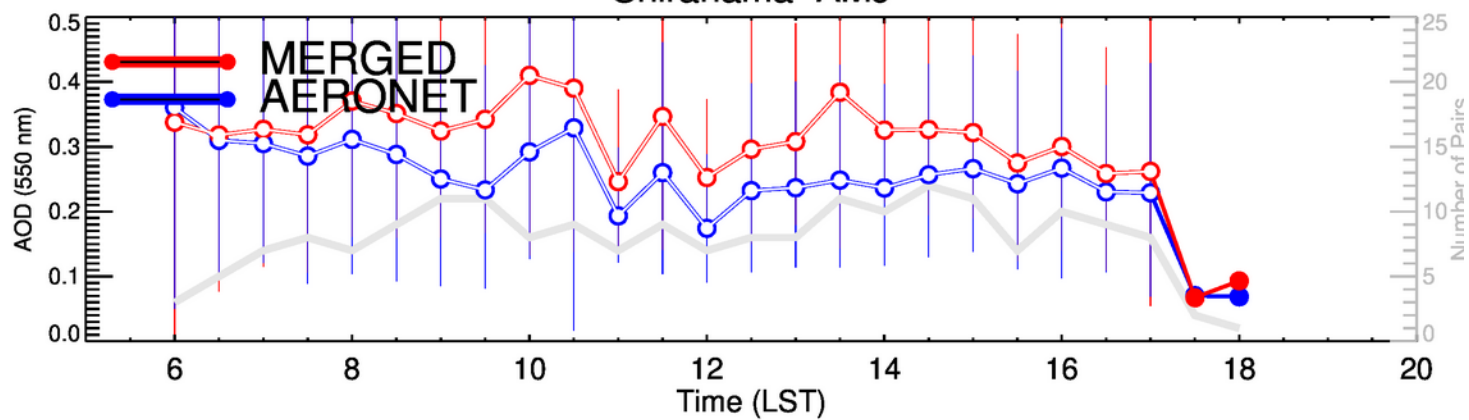

### Shirahama-JAS

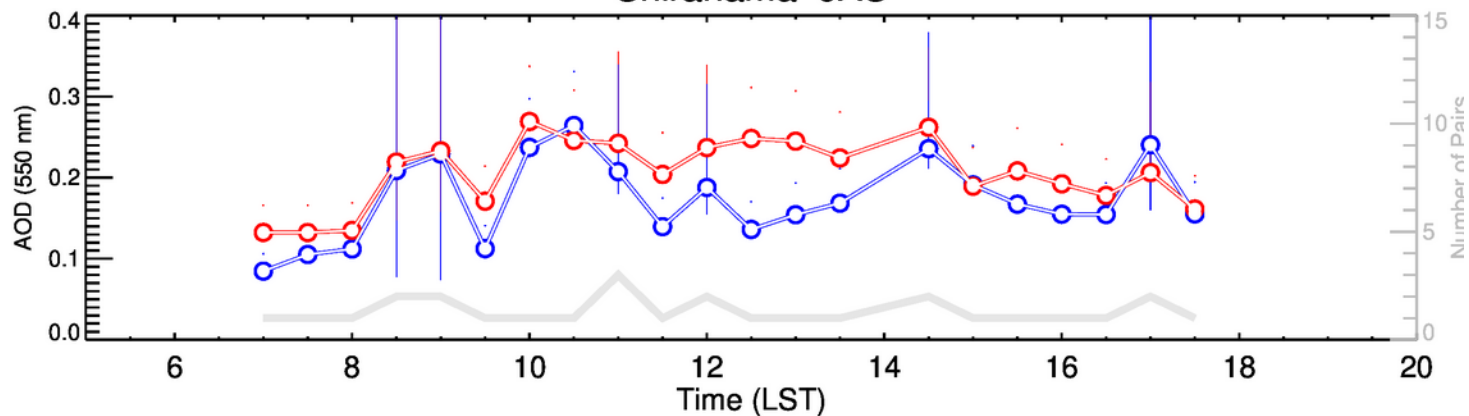

### Shirahama-OND

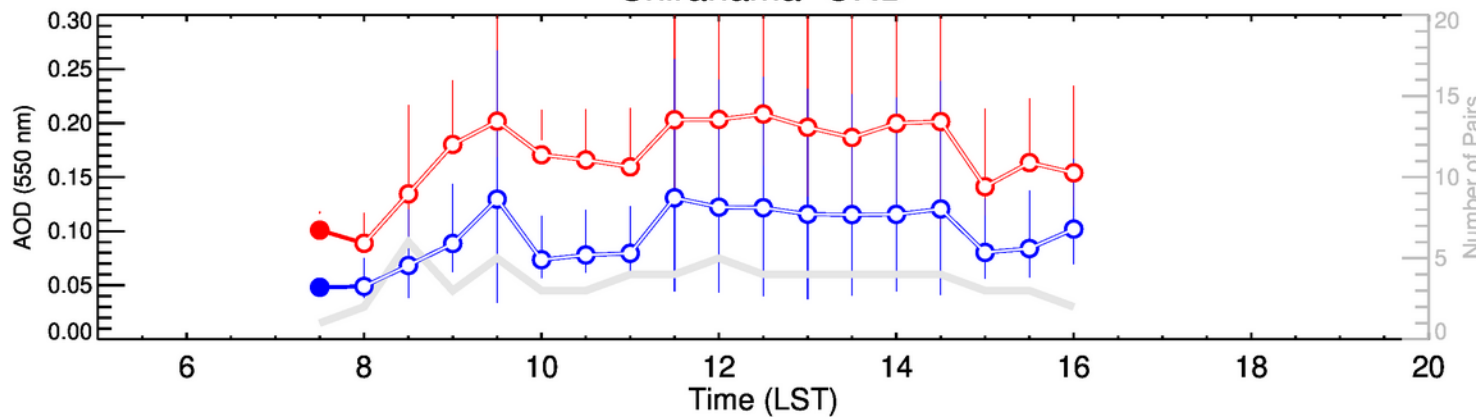

### Shirahama-JFM

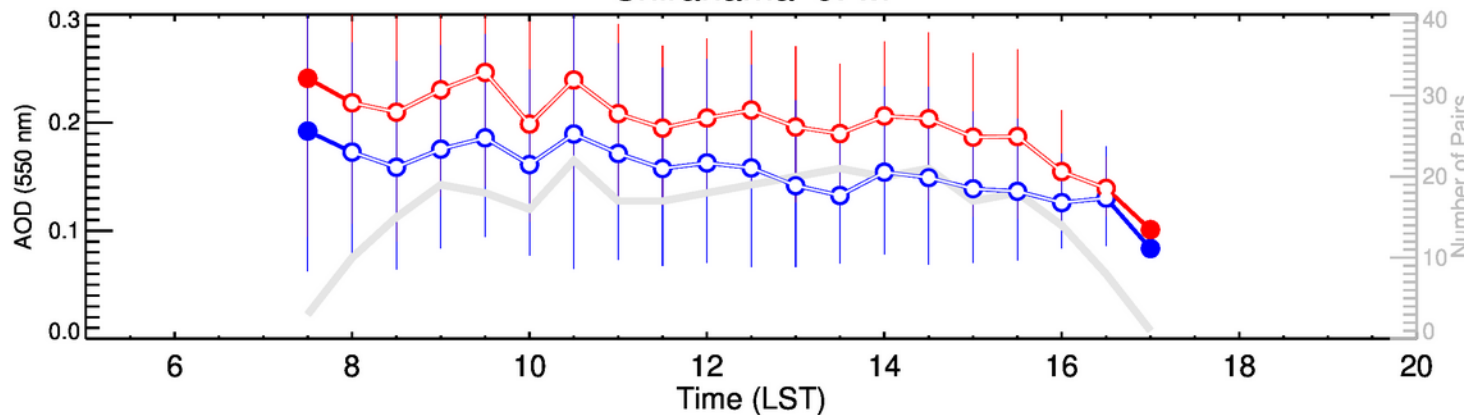

### Sigma\_Space\_Corp-AMJ

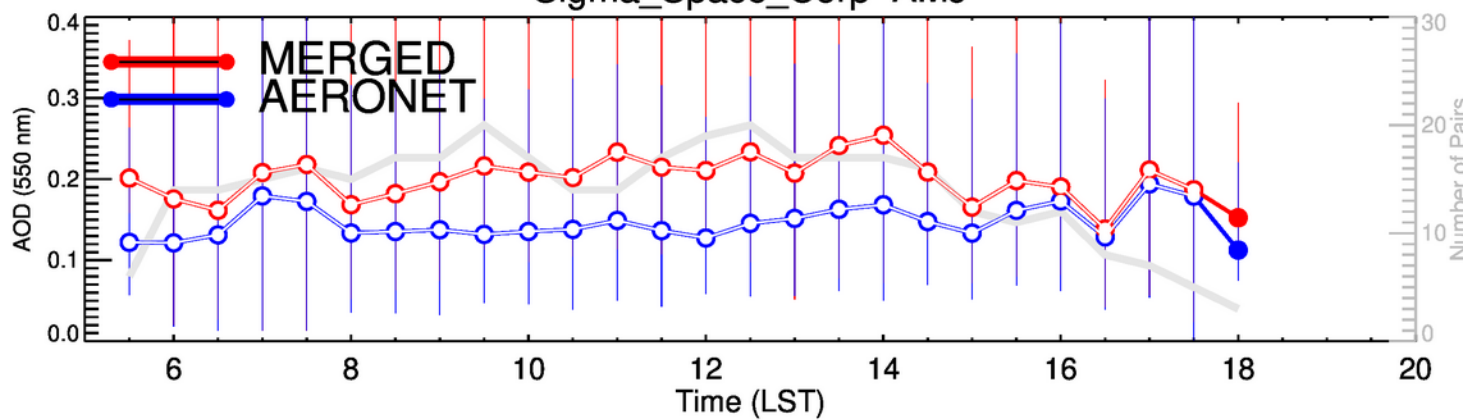

### Sigma\_Space\_Corp-OND

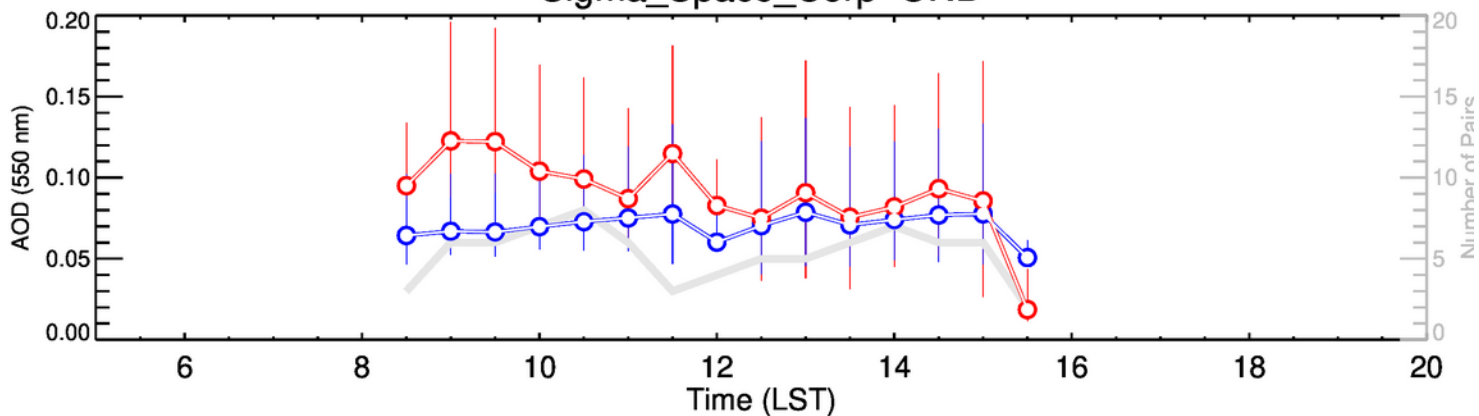

### Sigma\_Space\_Corp-JFM

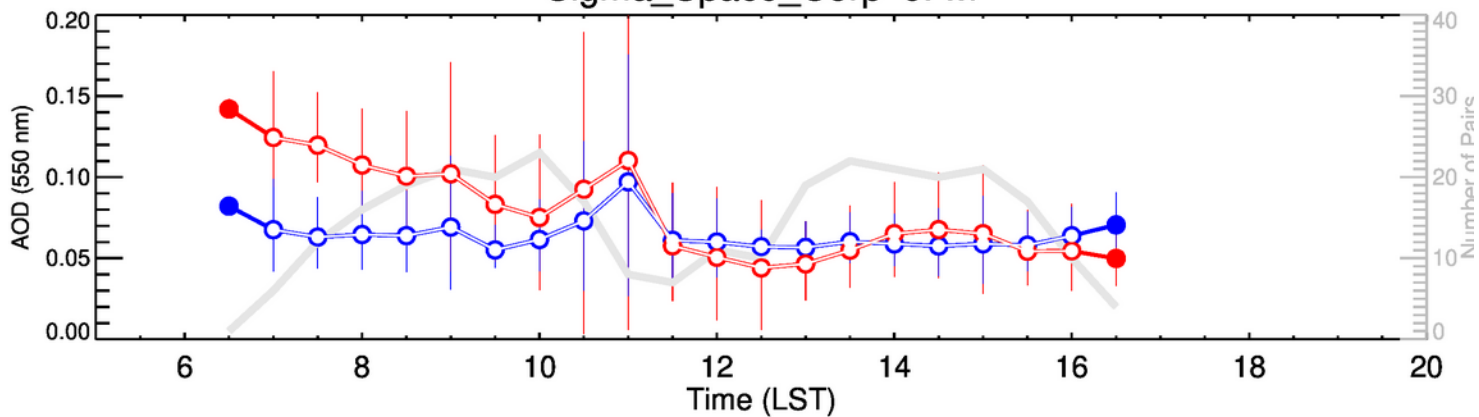

### Silpakorn\_Univ-AMJ

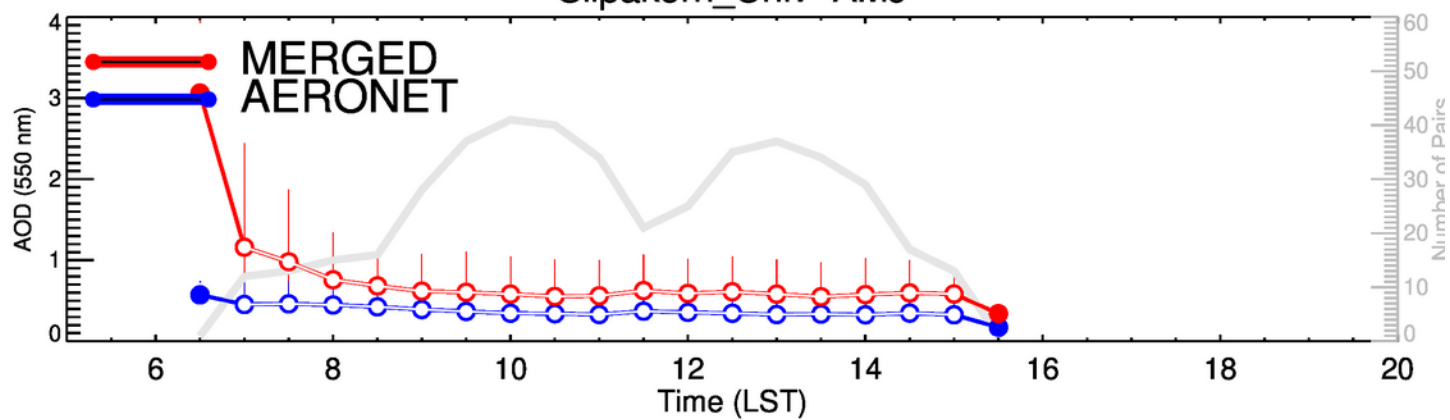

### Silpakorn\_Univ-JAS

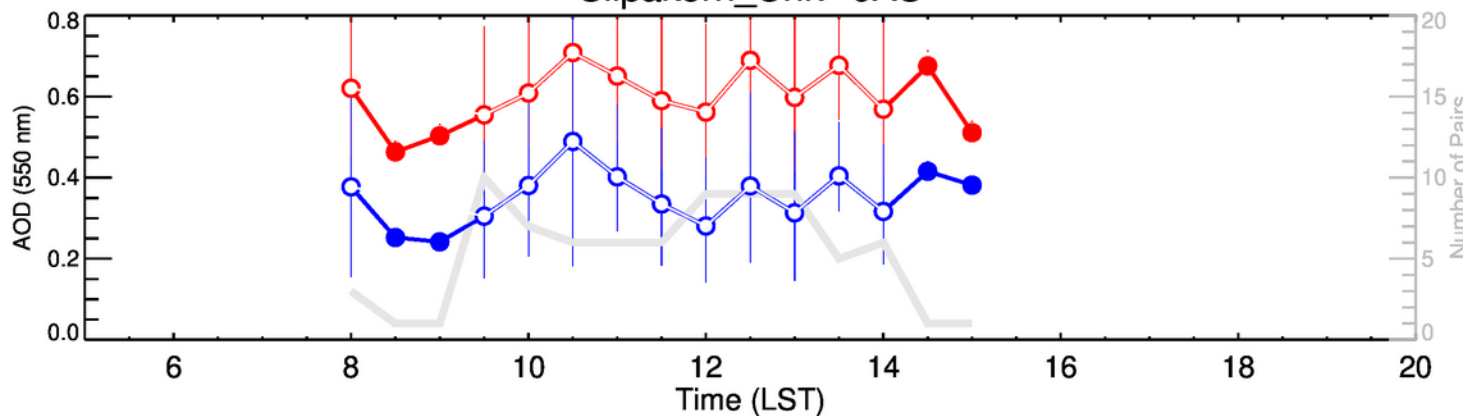

### Silpakorn\_Univ-OND

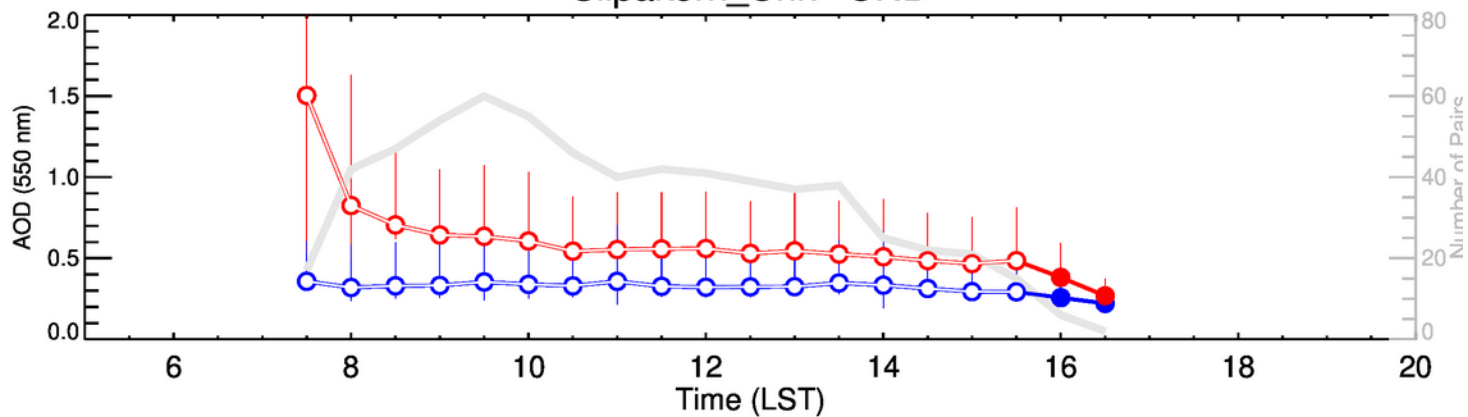

### Silpakorn\_Univ-JFM

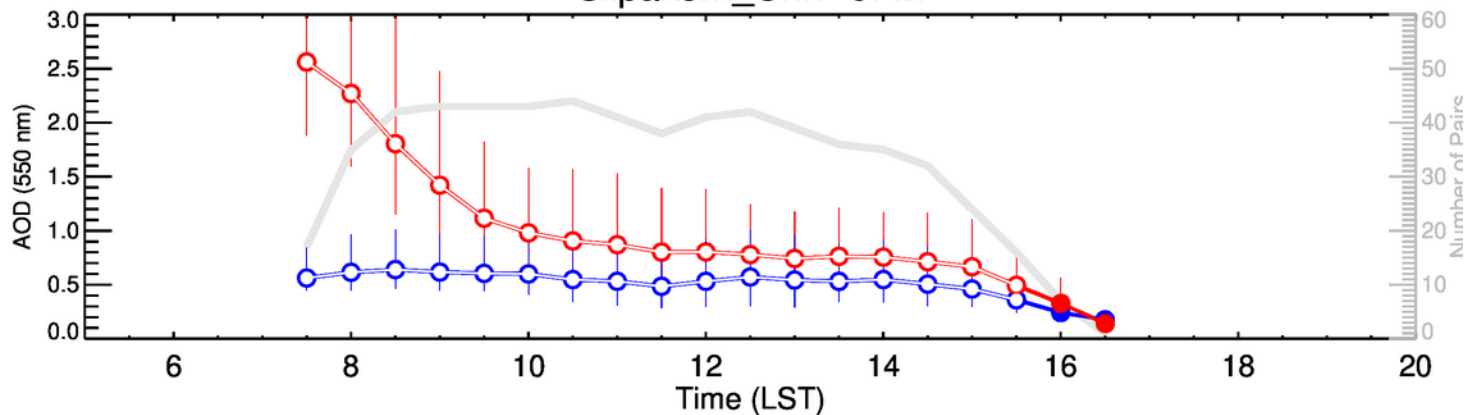

### Skukuza-AMJ

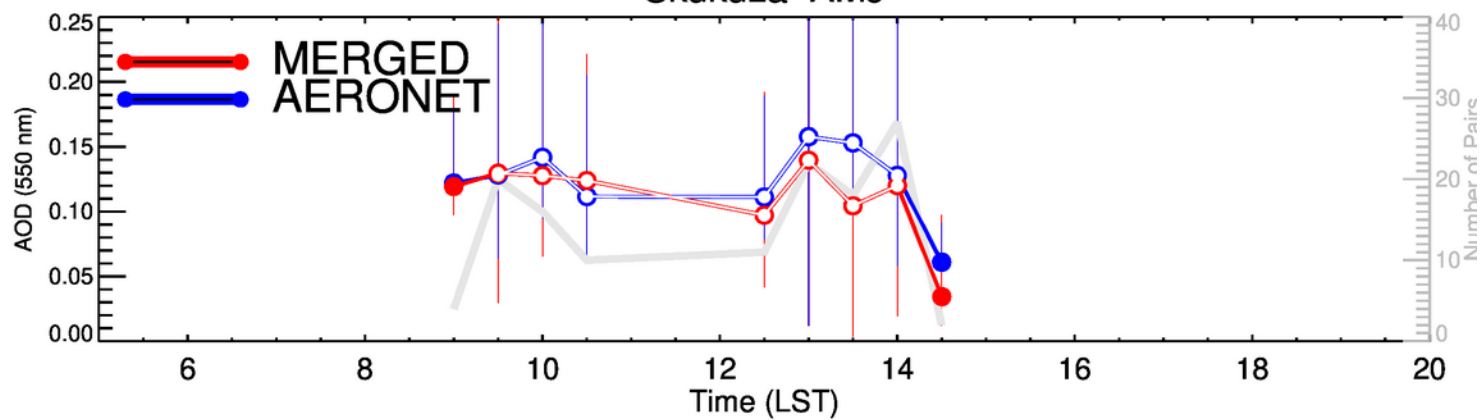

### Skukuza-JAS

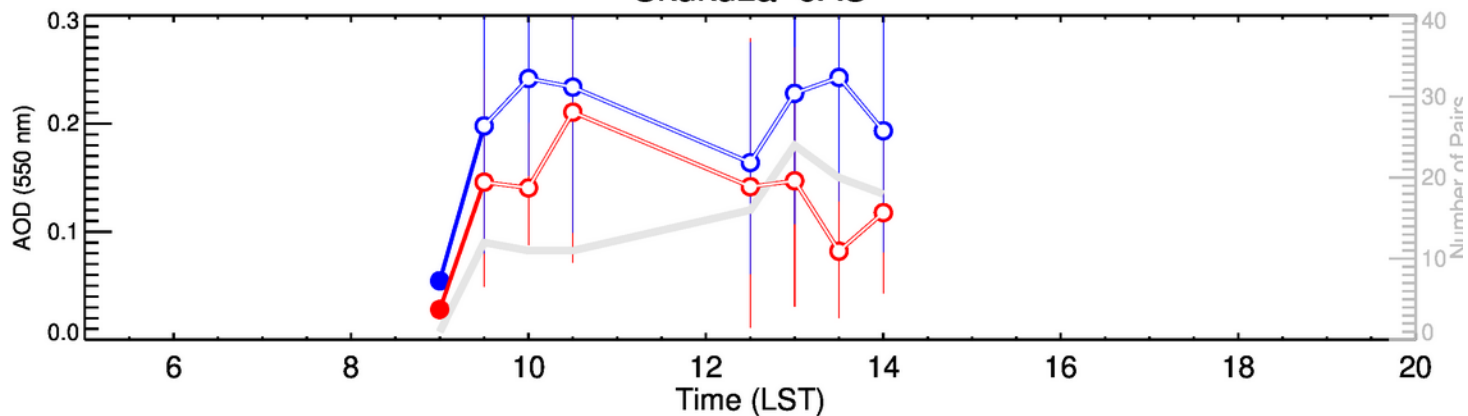

### Skukuza-JFM

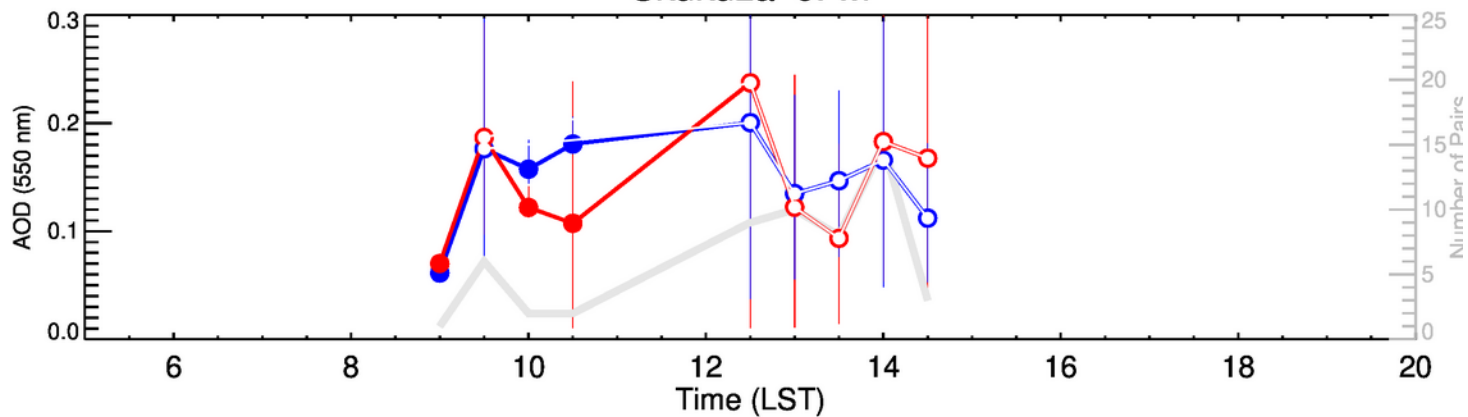

### Sorong-AMJ

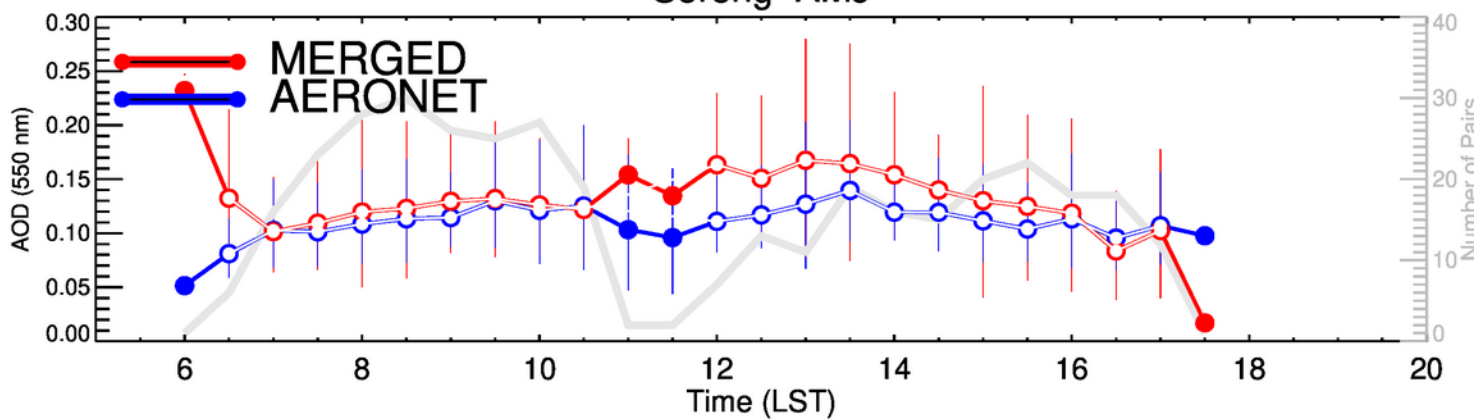

### Sorong-JAS

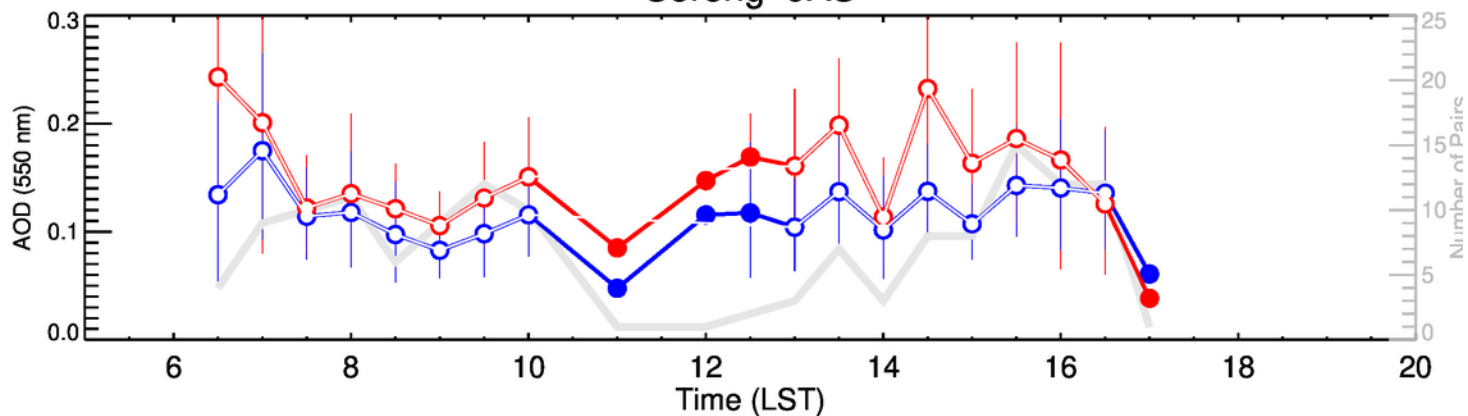

### Sorong-OND

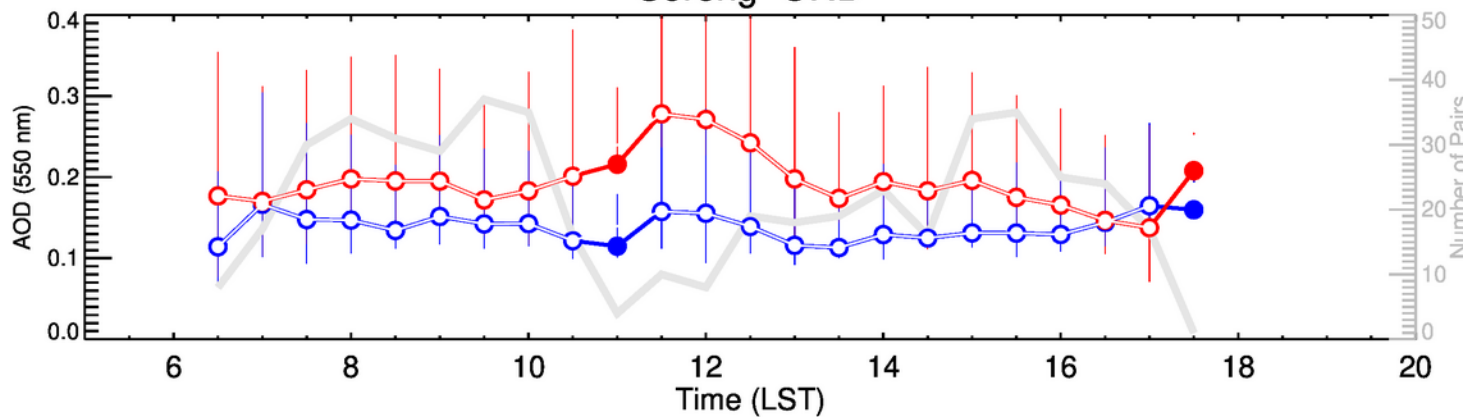

### Sorong-JFM

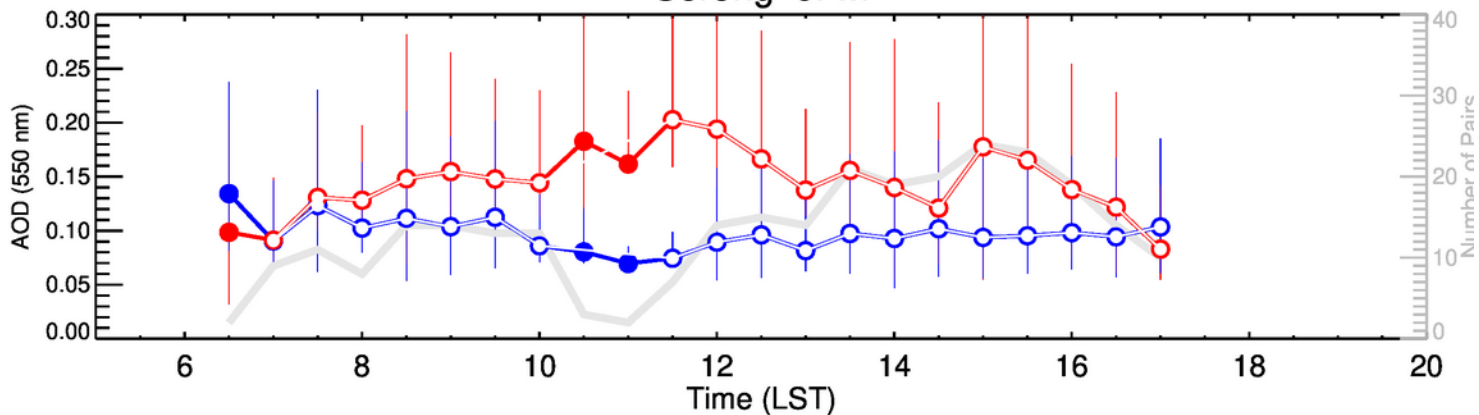



### Strzyzow-AMJ

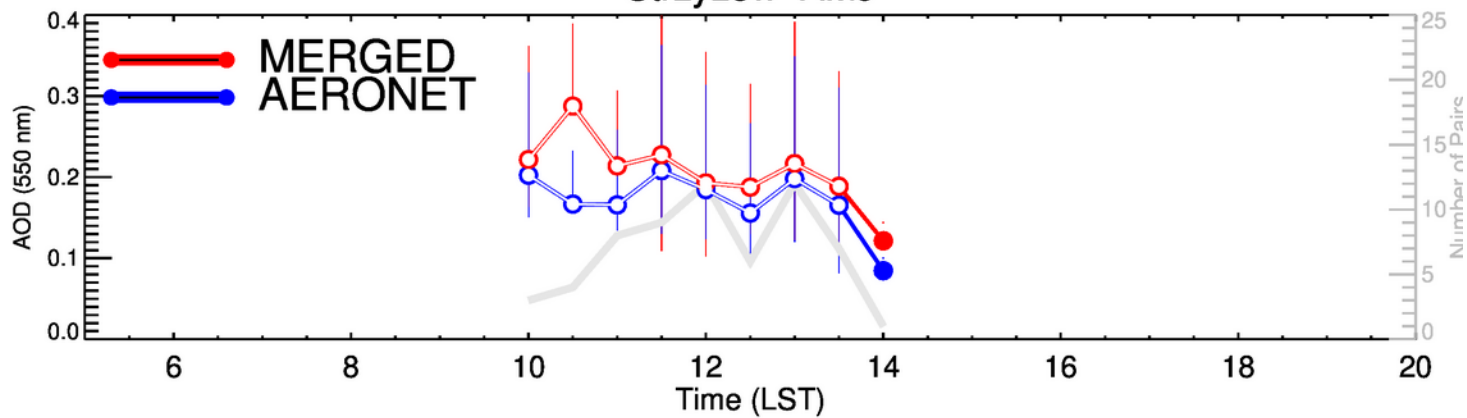

### Strzyzow-JAS

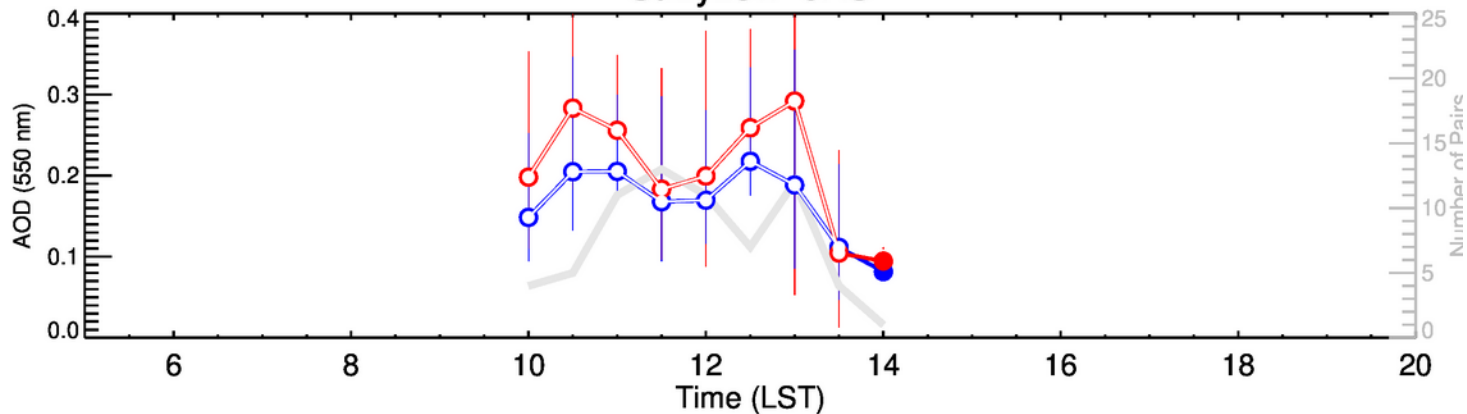

### Strzyzow-OND

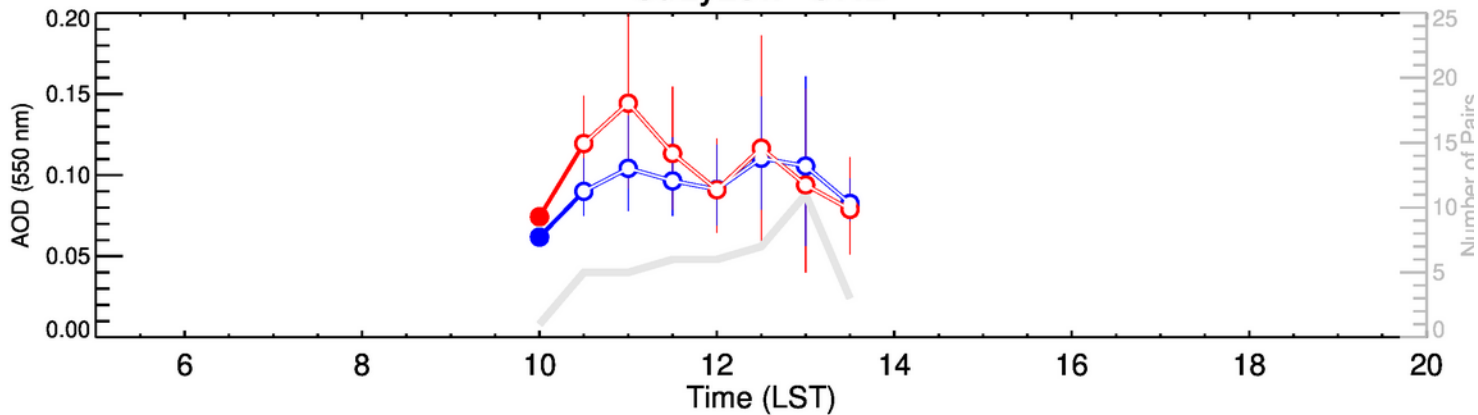

### Strzyzow-JFM

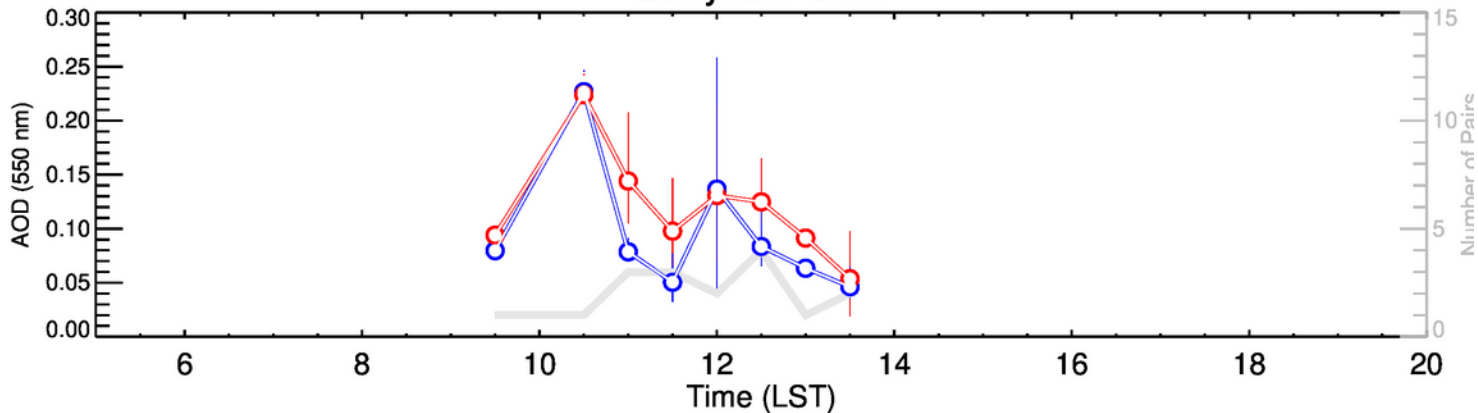

### Tai\_Ping-AMJ

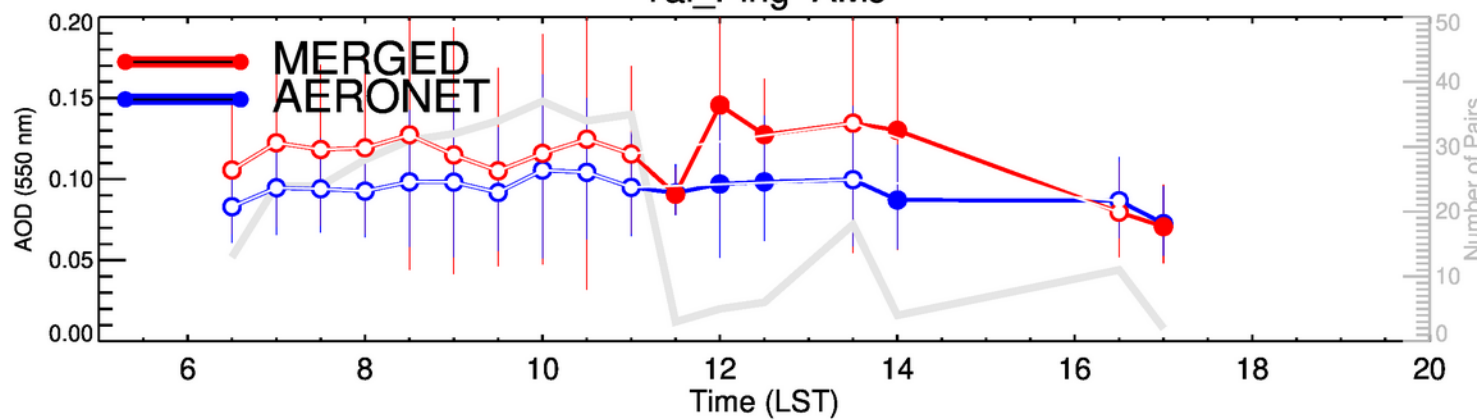

### Tai\_Ping-JAS

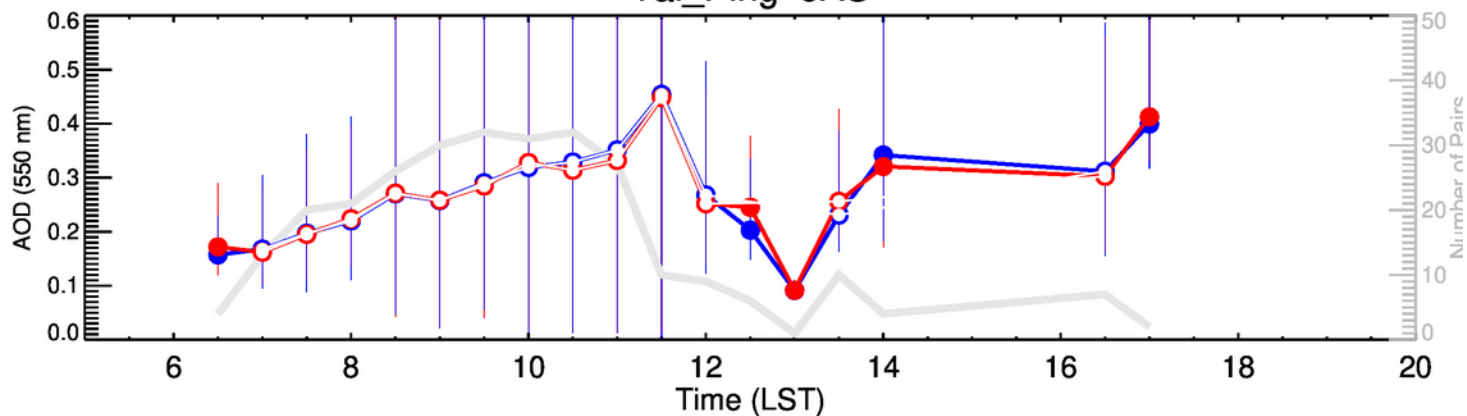

### Tai\_Ping-OND

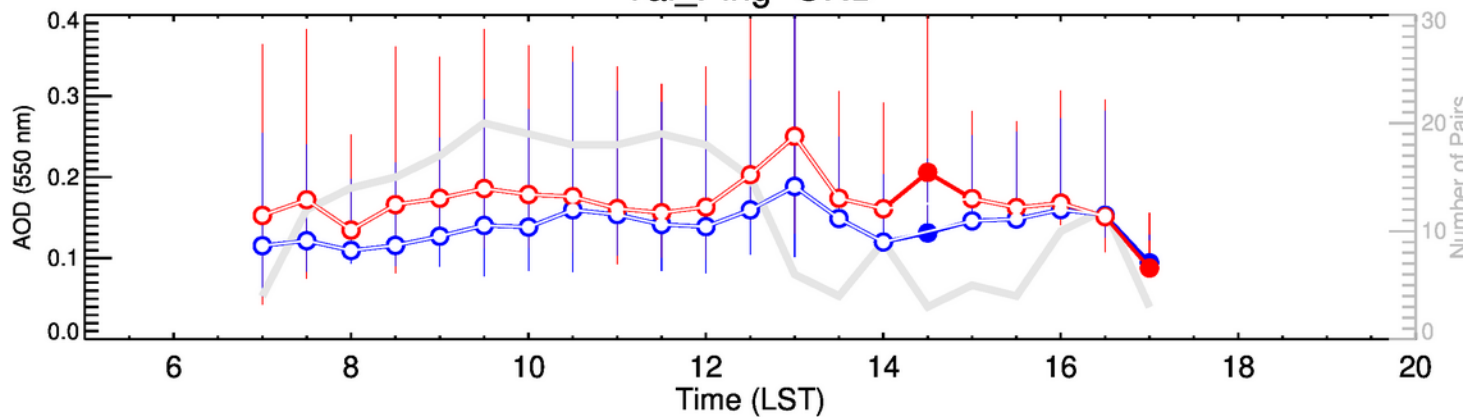

### Tai\_Ping-JFM

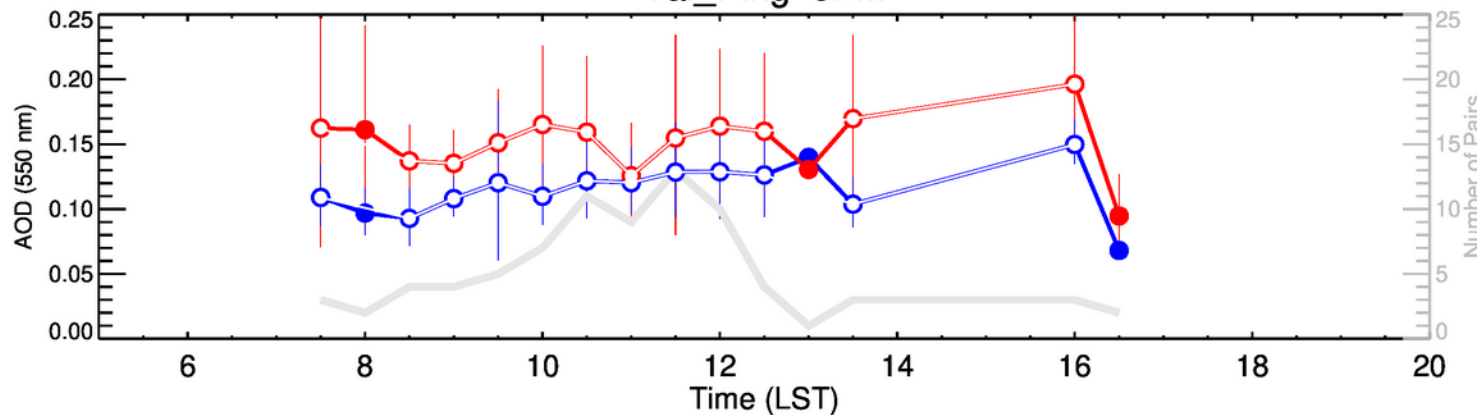

Taipei\_CWB-AMJ

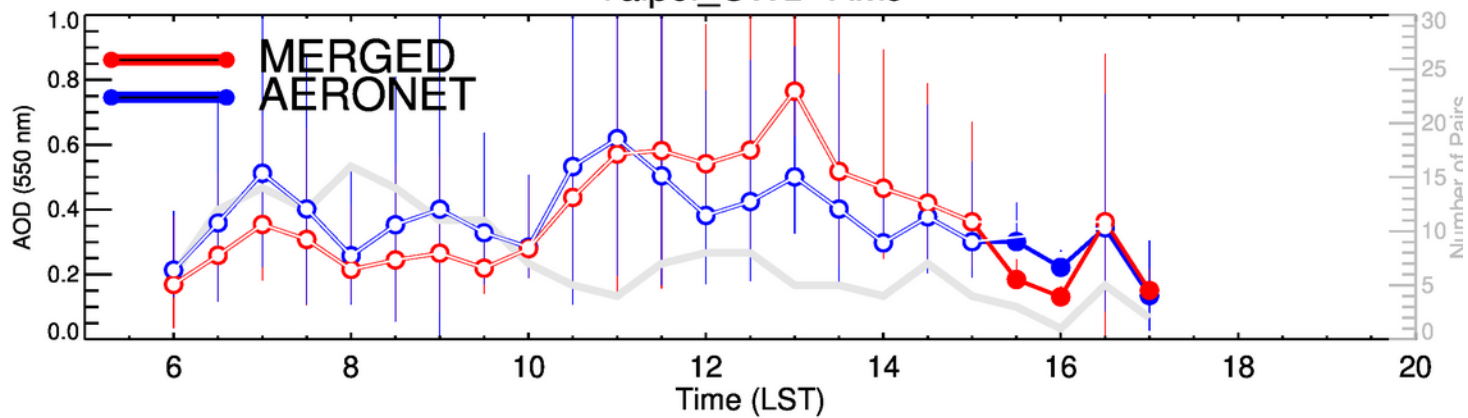

Taipei\_CWB-JAS

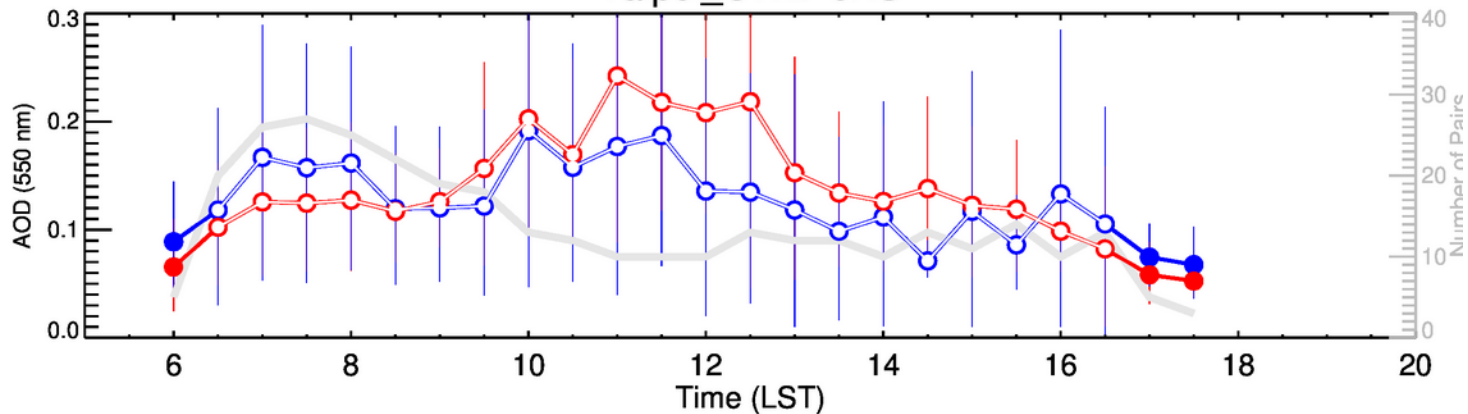

Taipei\_CWB-OND

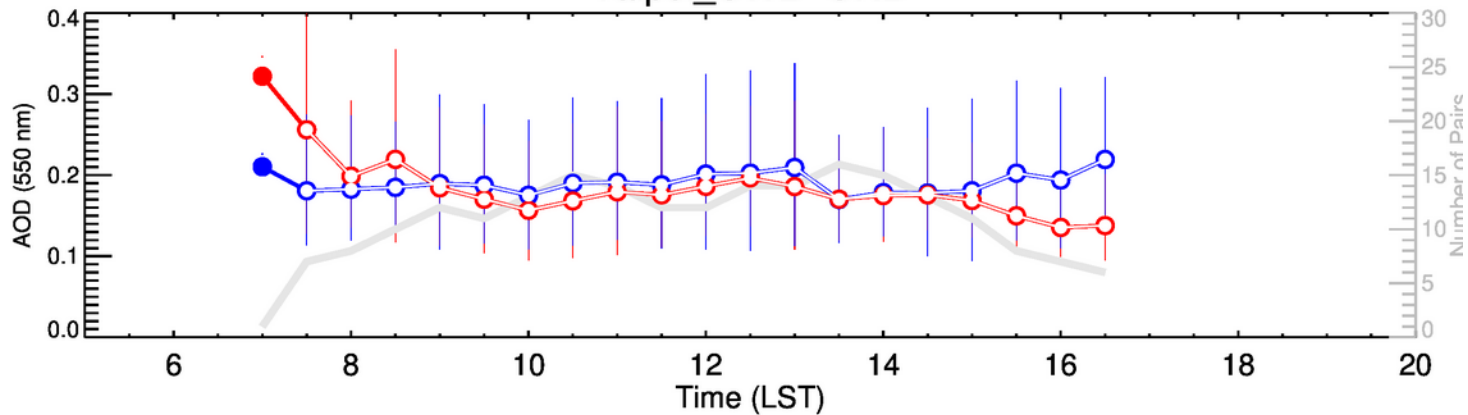

Taipei\_CWB-JFM

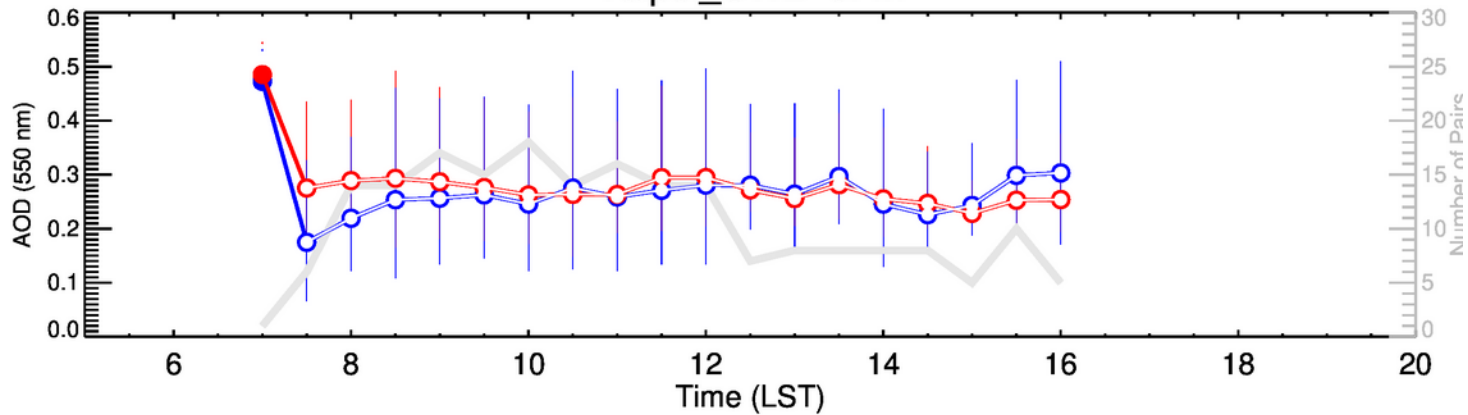

Tallahassee-AMJ

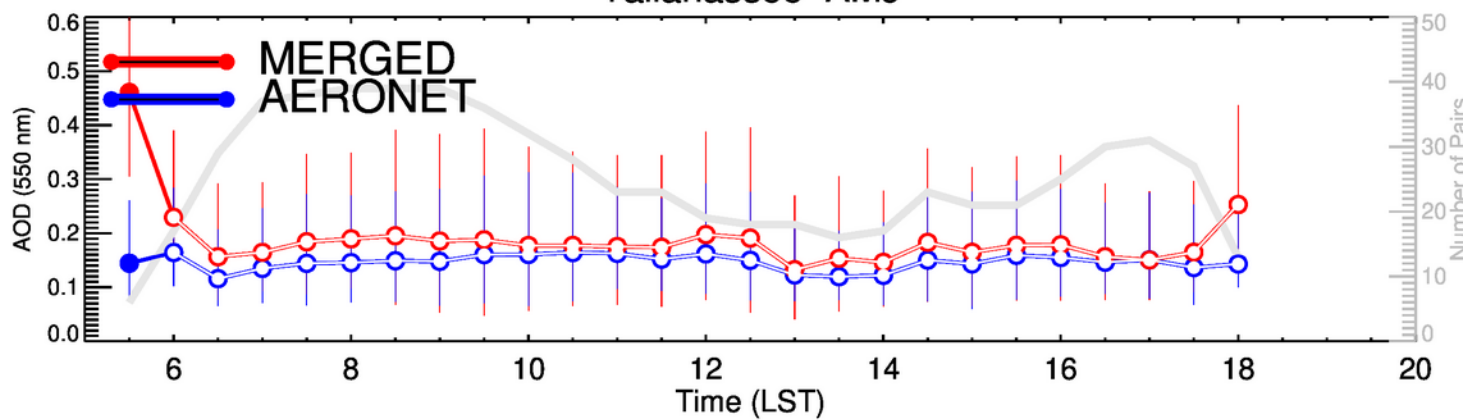

Tallahassee-JAS

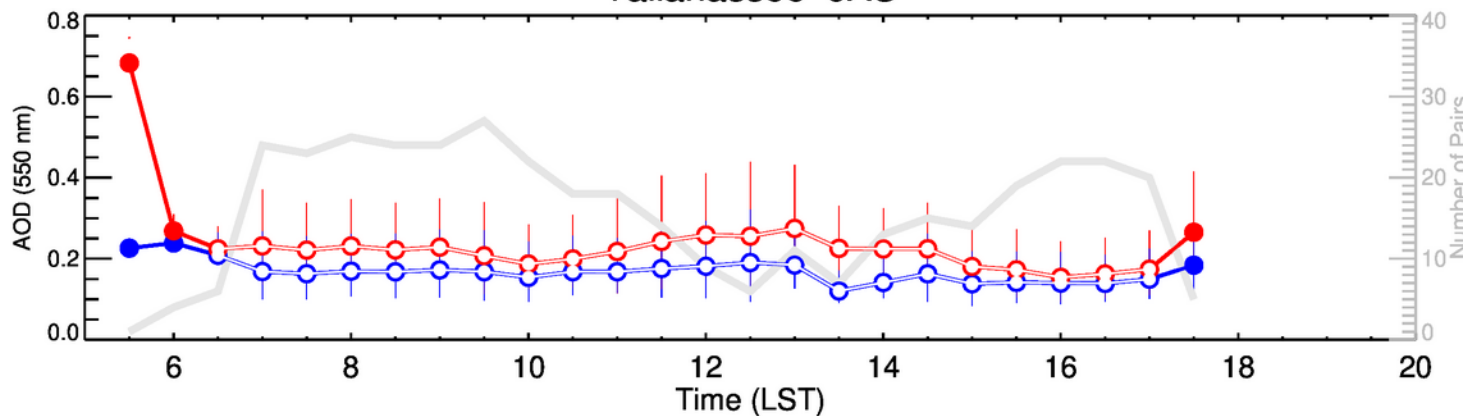

Tallahassee-OND

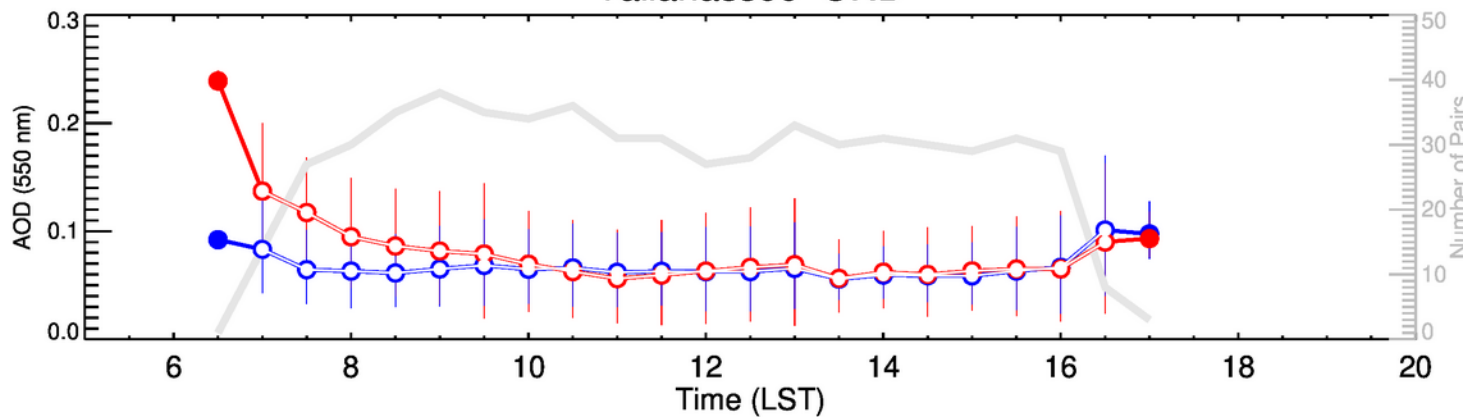

Tallahassee-JFM

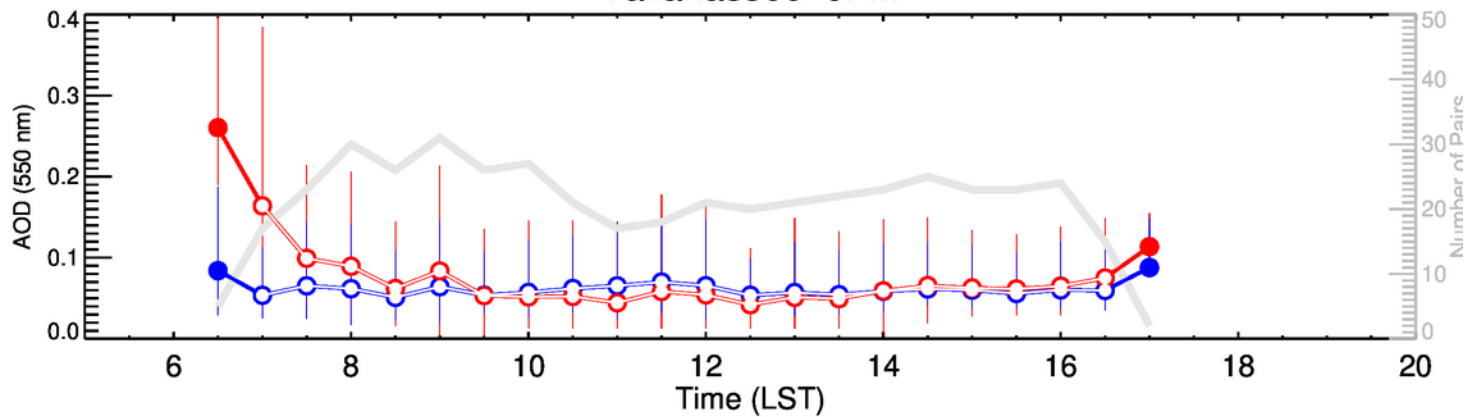

Temuco-UFRO\_CEFOP-AMJ

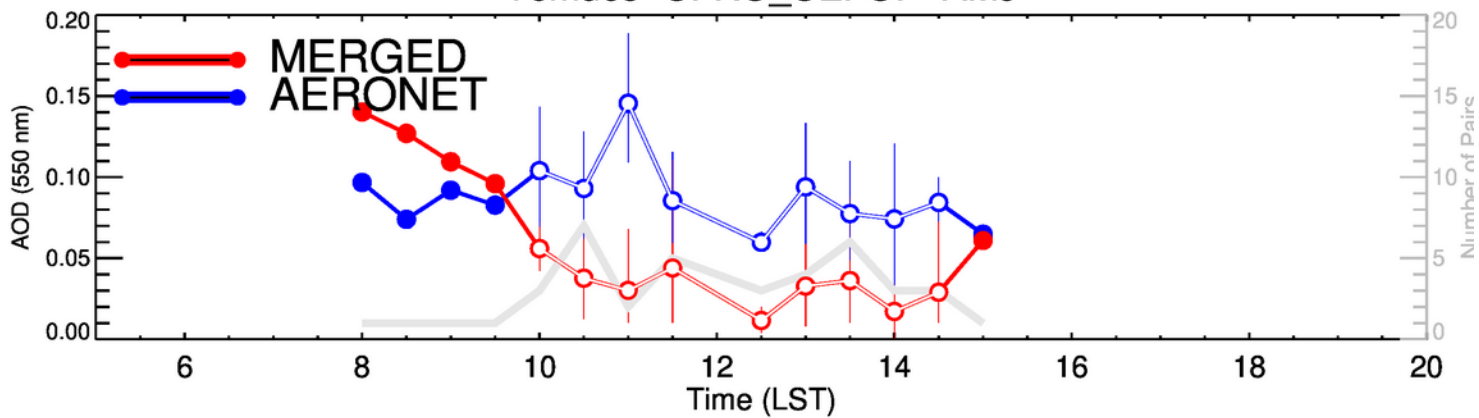

Temuco-UFRO\_CEFOP-JAS

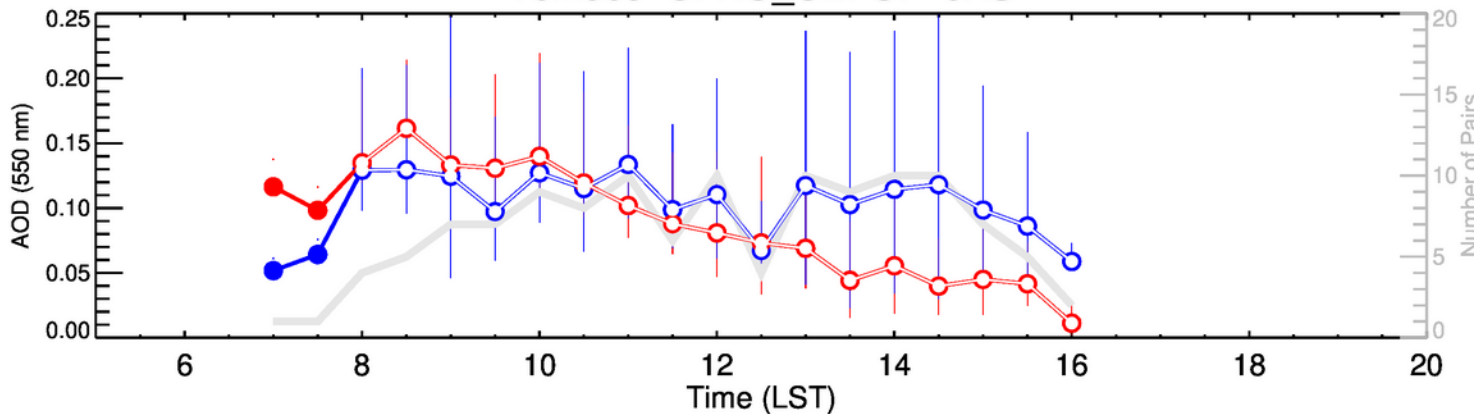

Temuco-UFRO\_CEFOP-OND

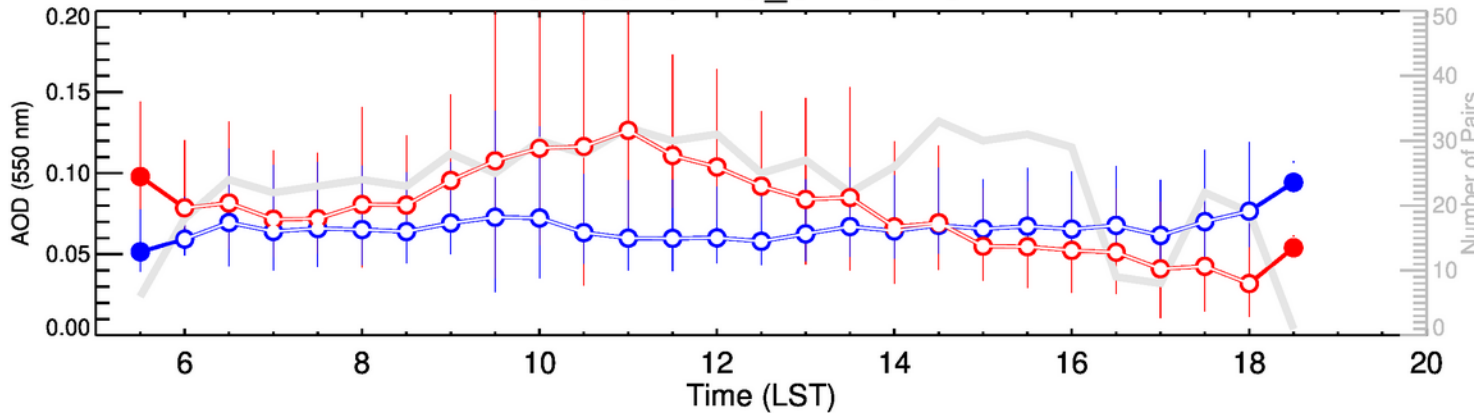

Temuco-UFRO\_CEFOP-JFM

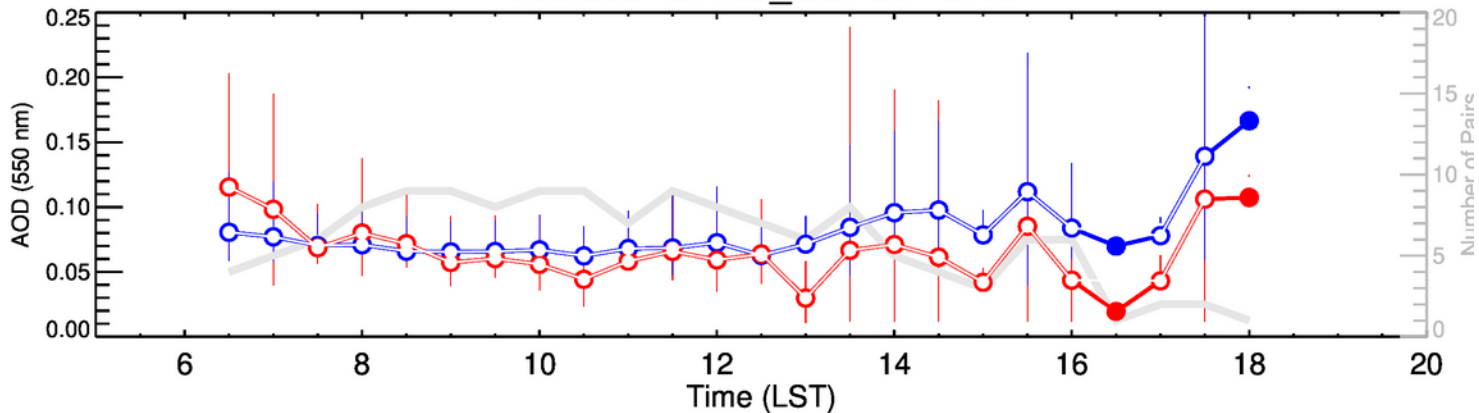

### Thessaloniki-JAS

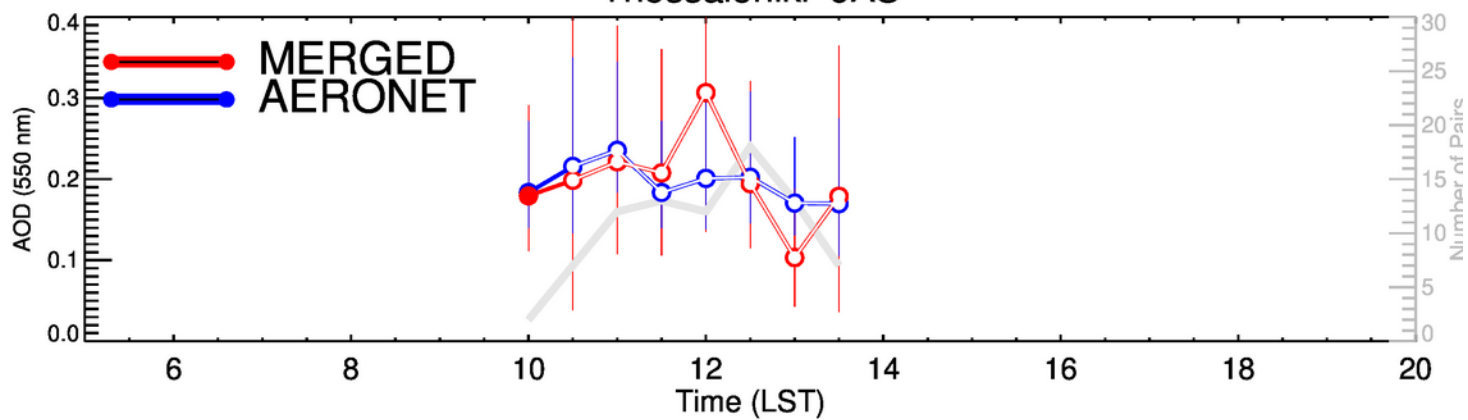

### Thessaloniki-OND

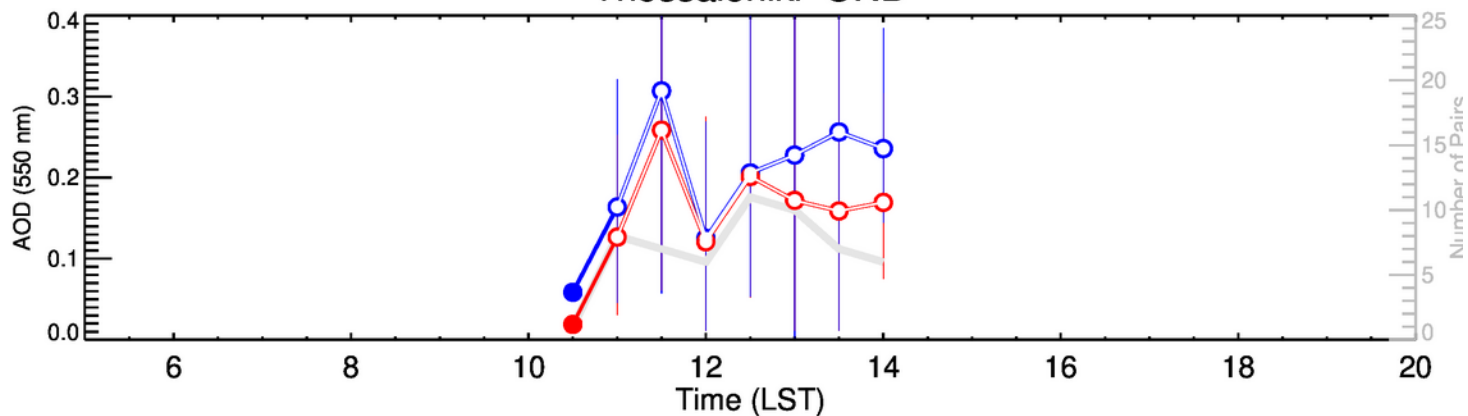

### Thessaloniki-JFM

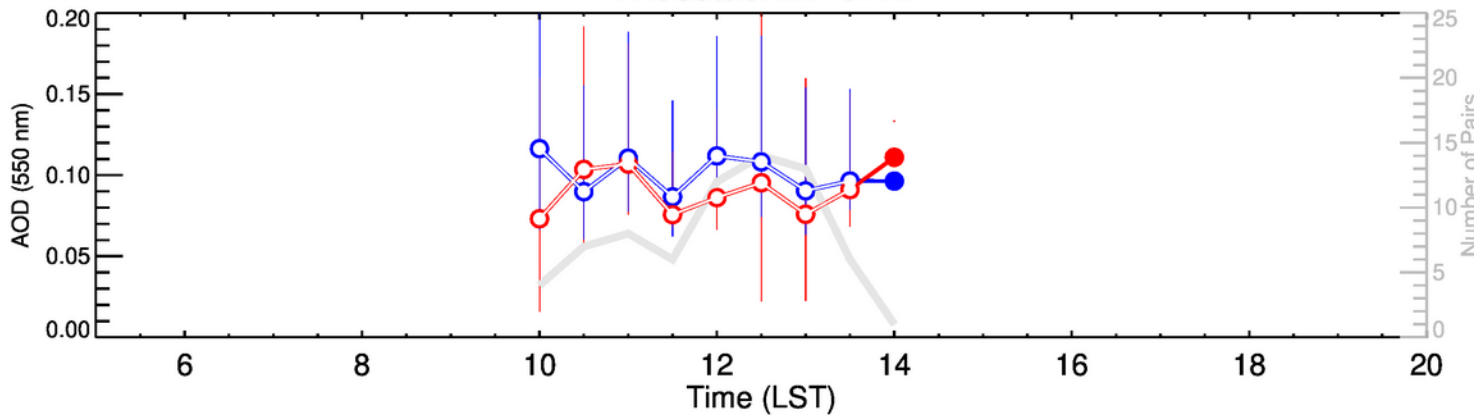

### Thompson\_Farm-AMJ

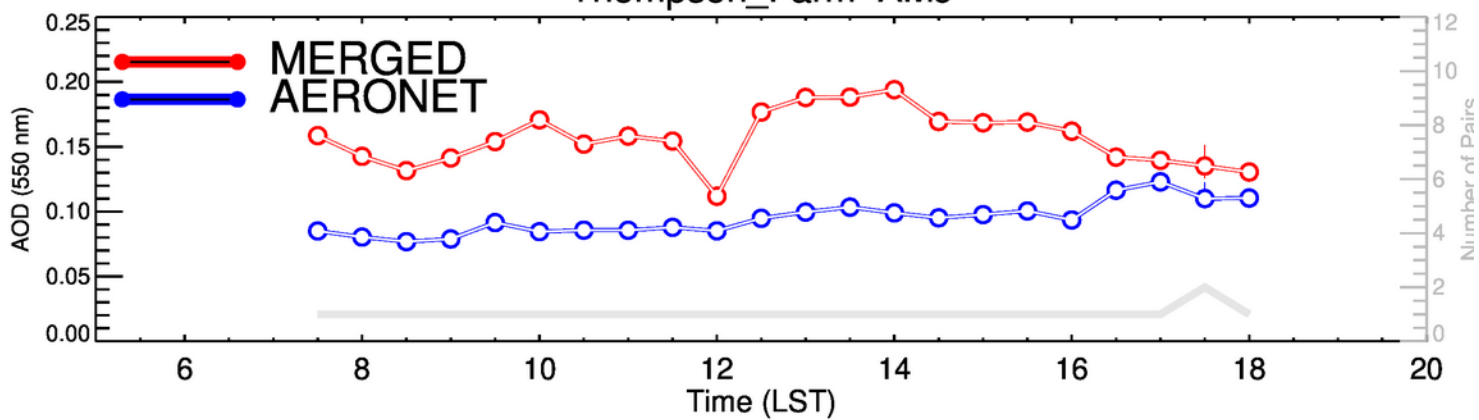

### Thompson\_Farm-JAS

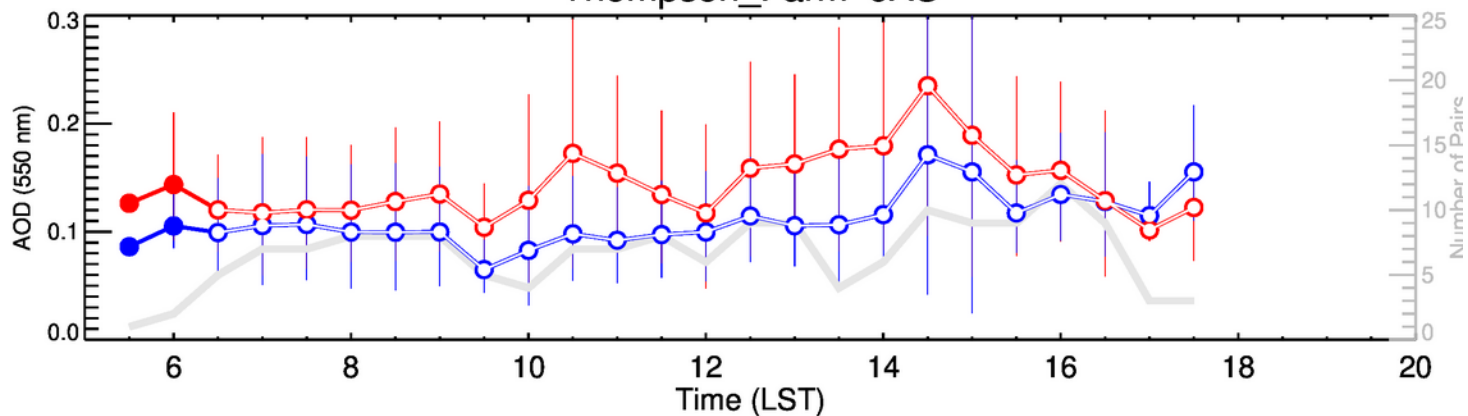

### Thompson\_Farm-OND

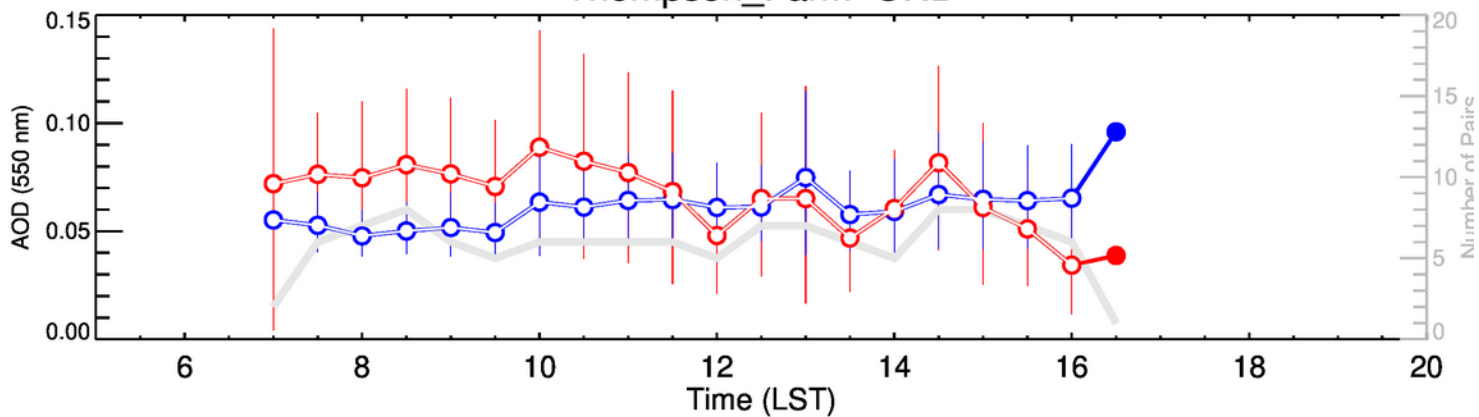

### Thompson\_Farm-JFM

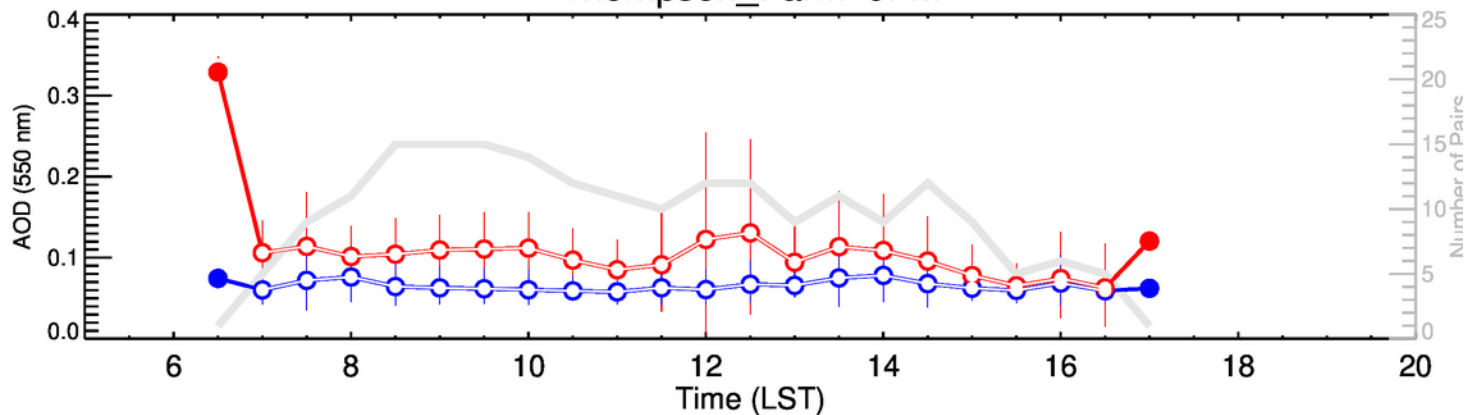

### Timisoara-AMJ

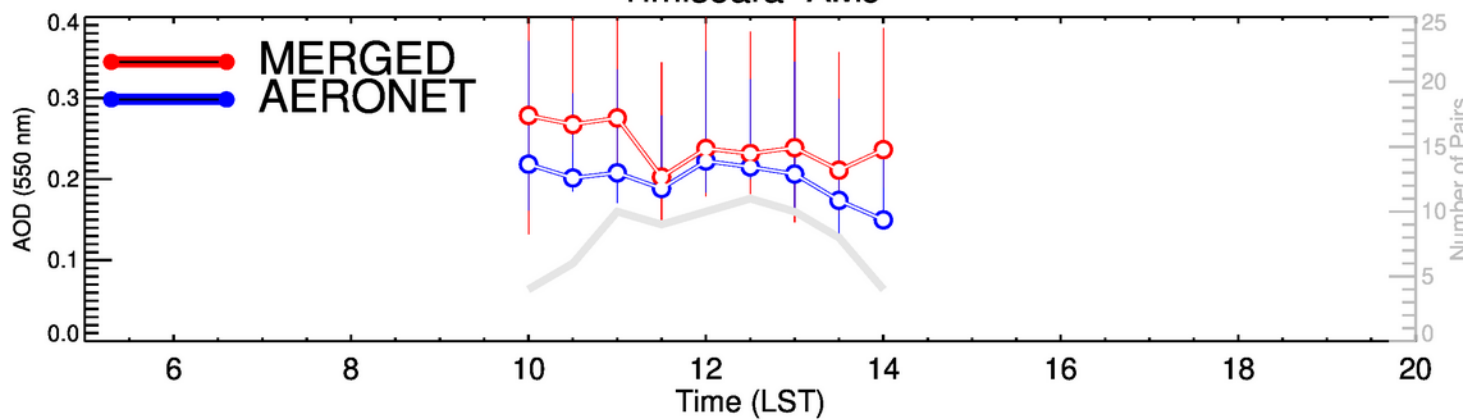

### Timisoara-JAS

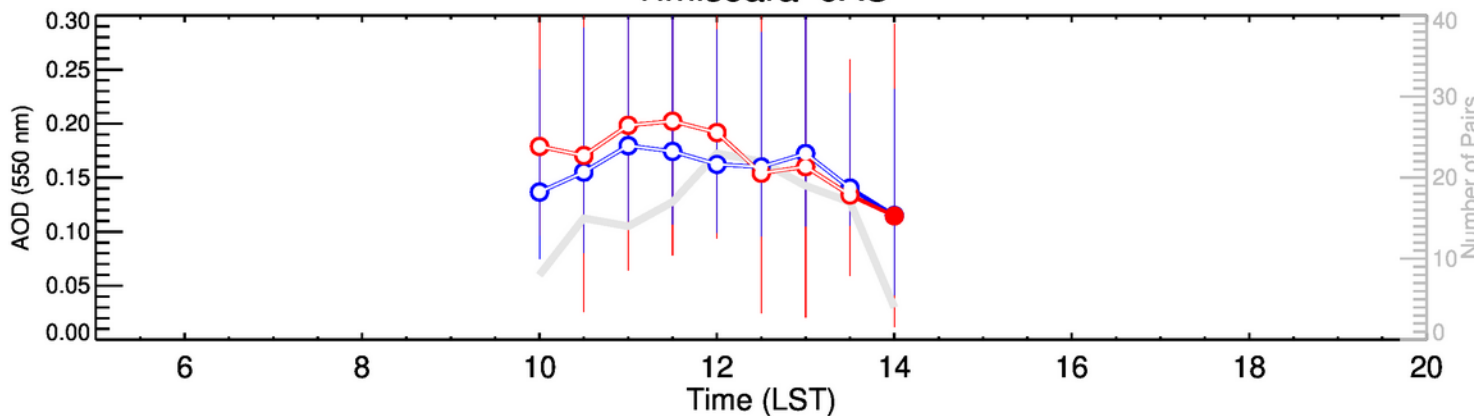

### Timisoara-OND

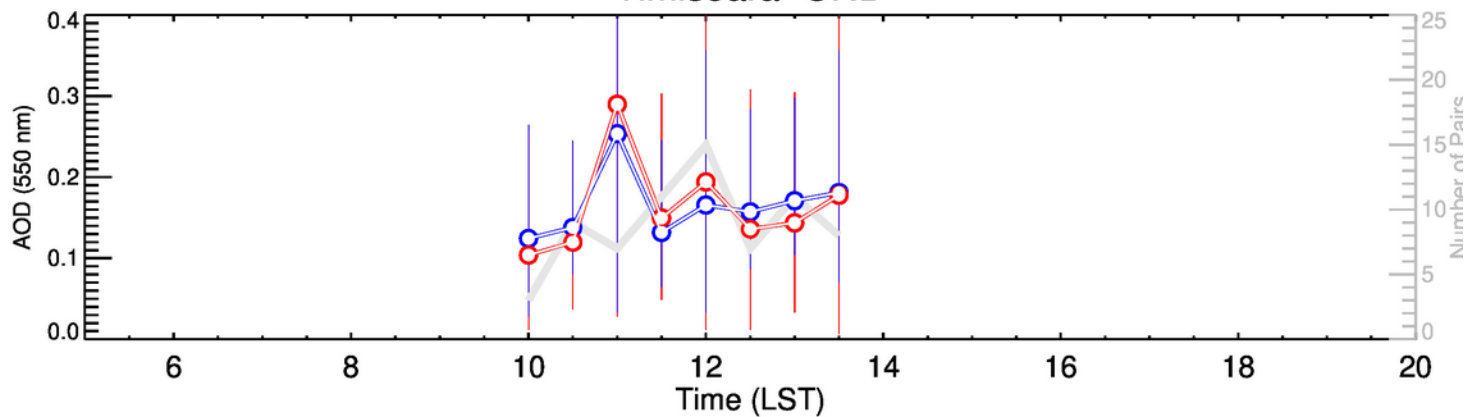

### Timisoara-JFM

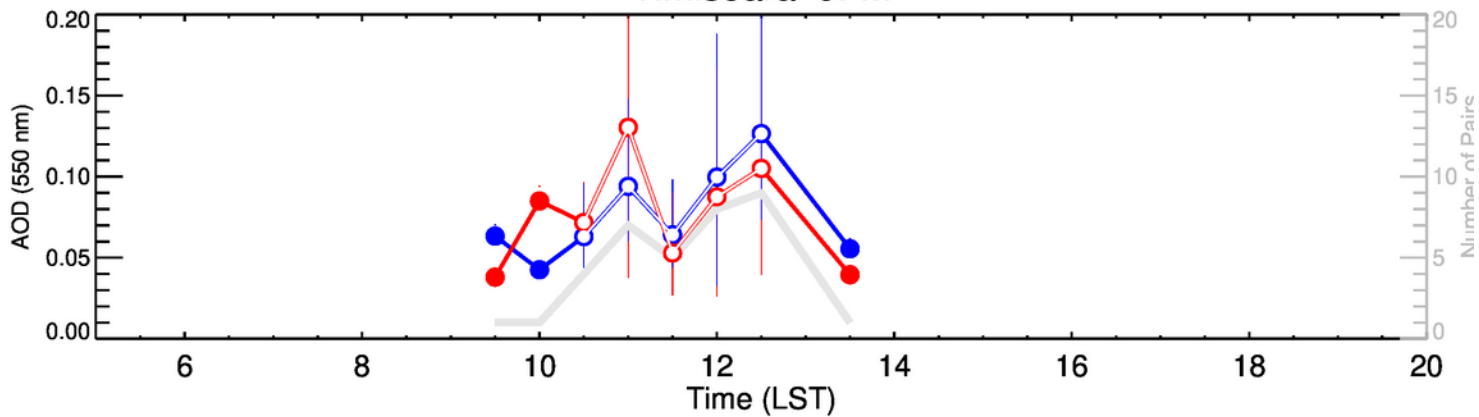



### Toulon-AMJ

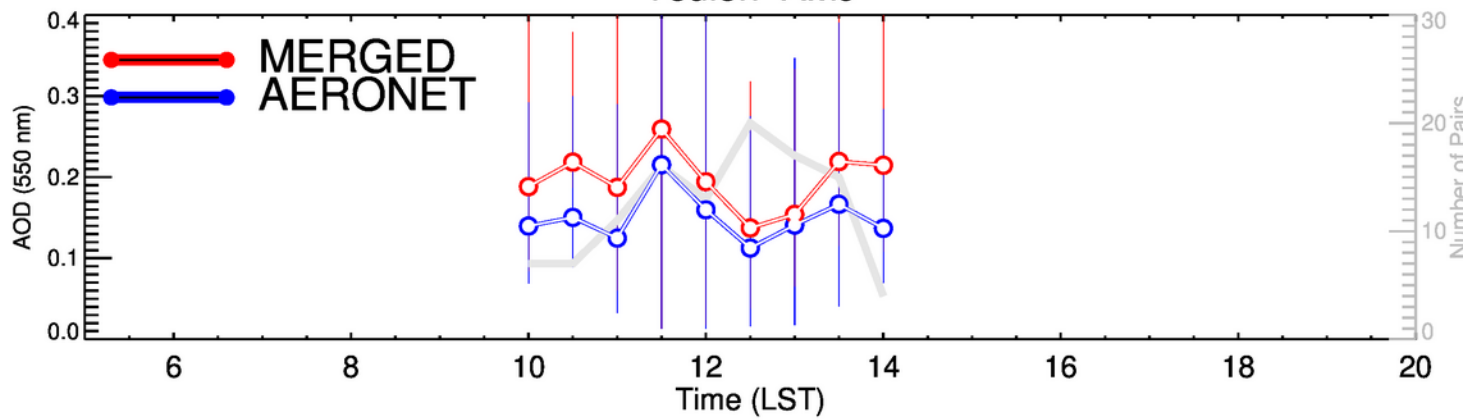

### Toulon-JAS

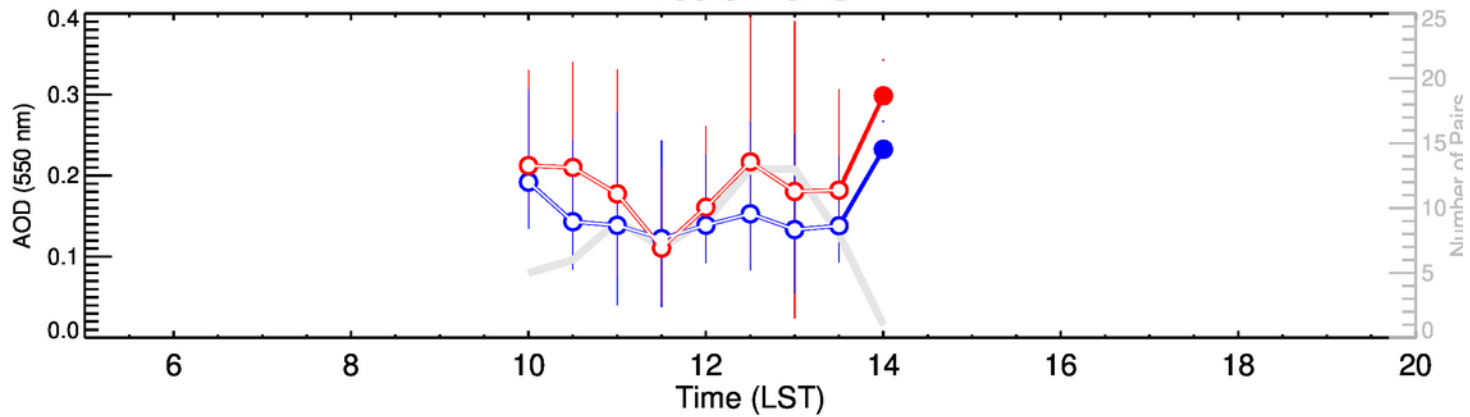

### Toulon-OND

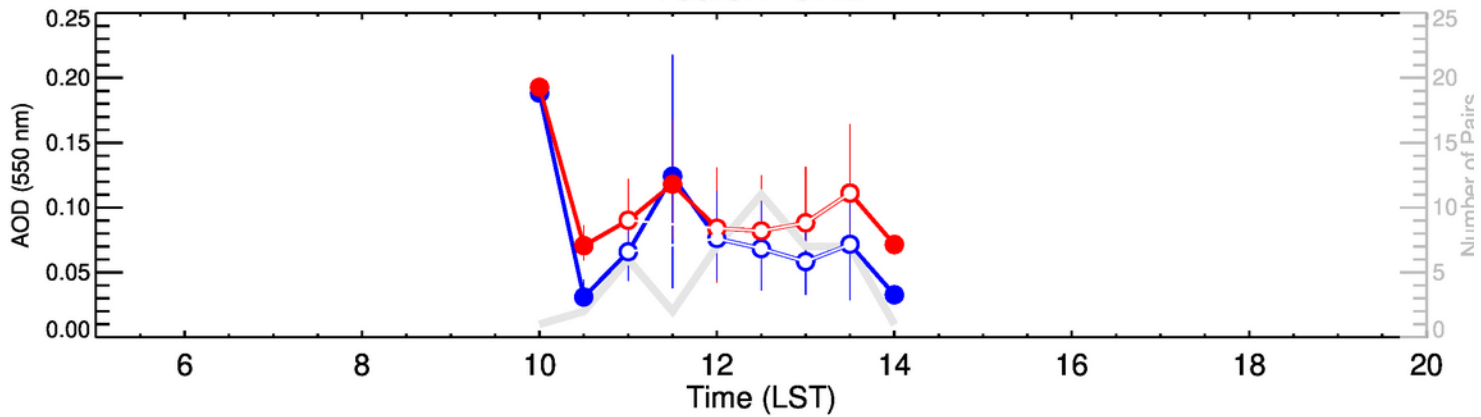

### Toulon-JFM

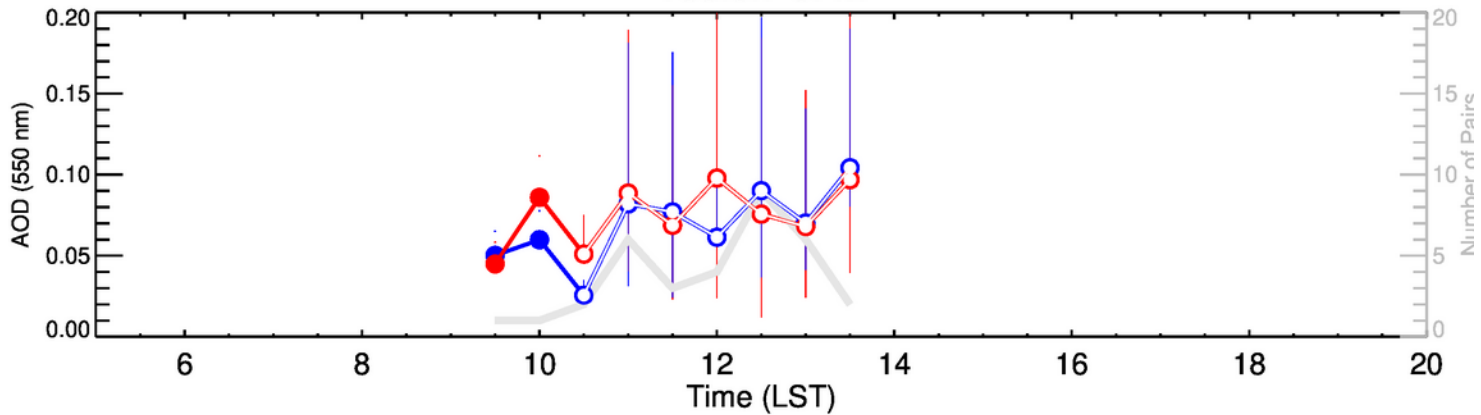

Toulouse\_MF-AMJ

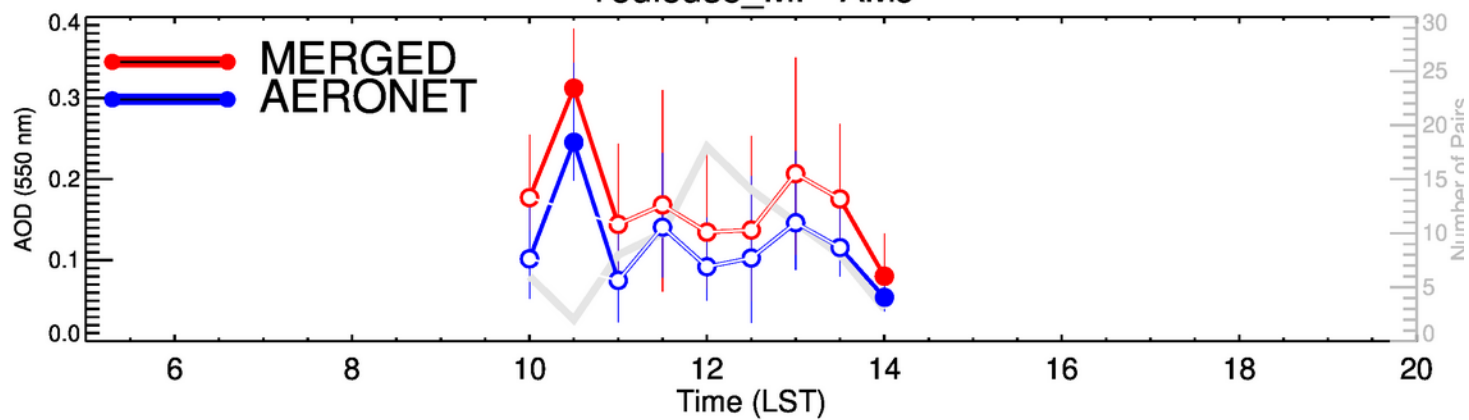

Toulouse\_MF-JAS

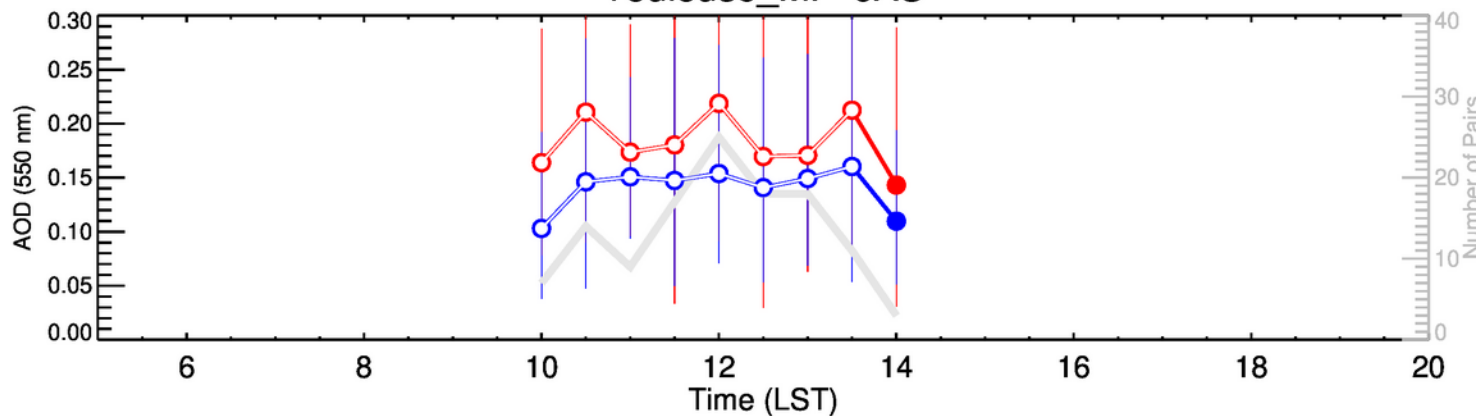

Toulouse\_MF-OND

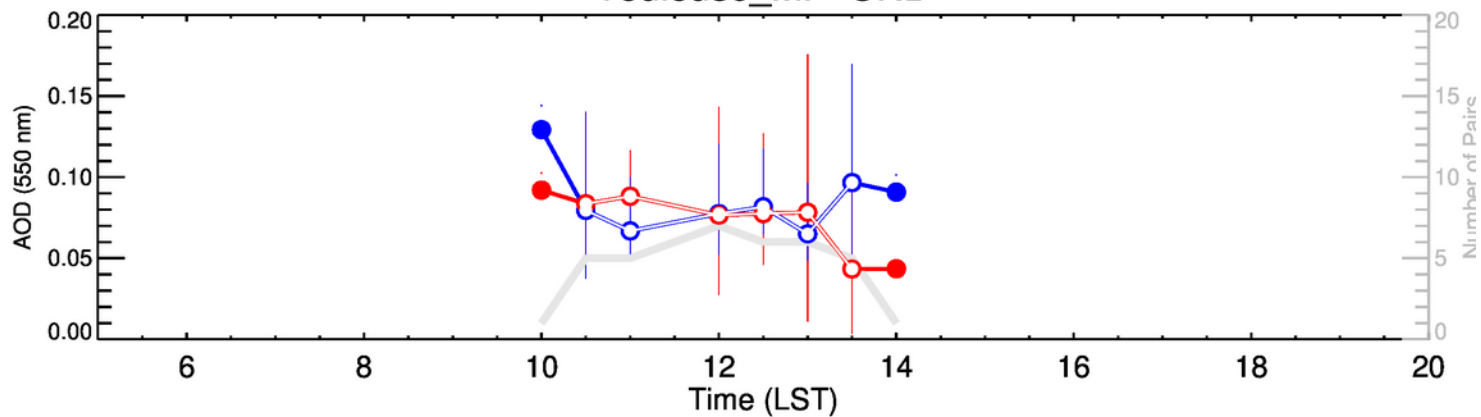

Toulouse\_MF-JFM

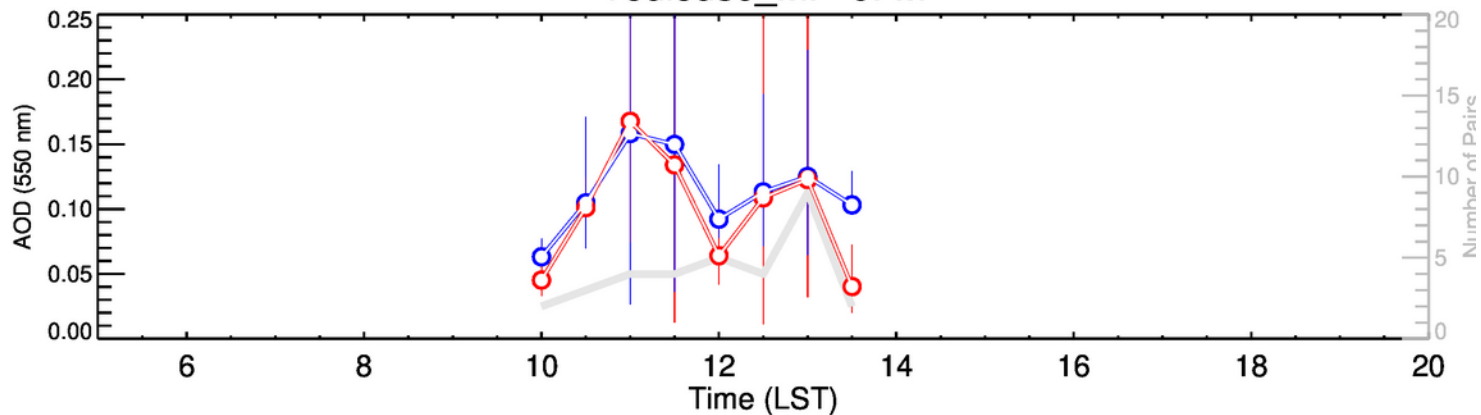

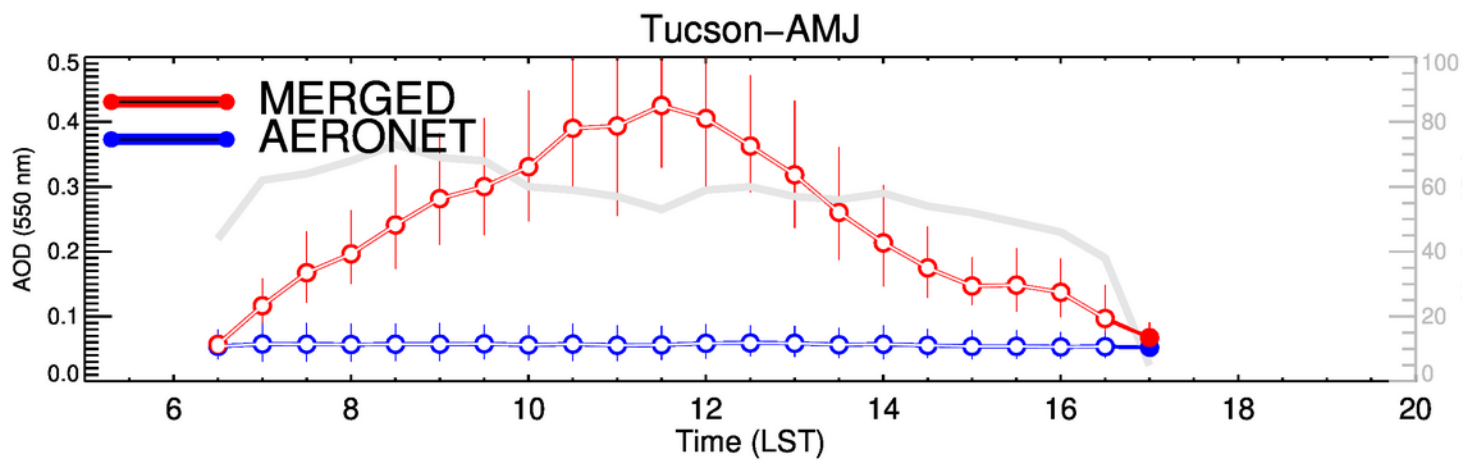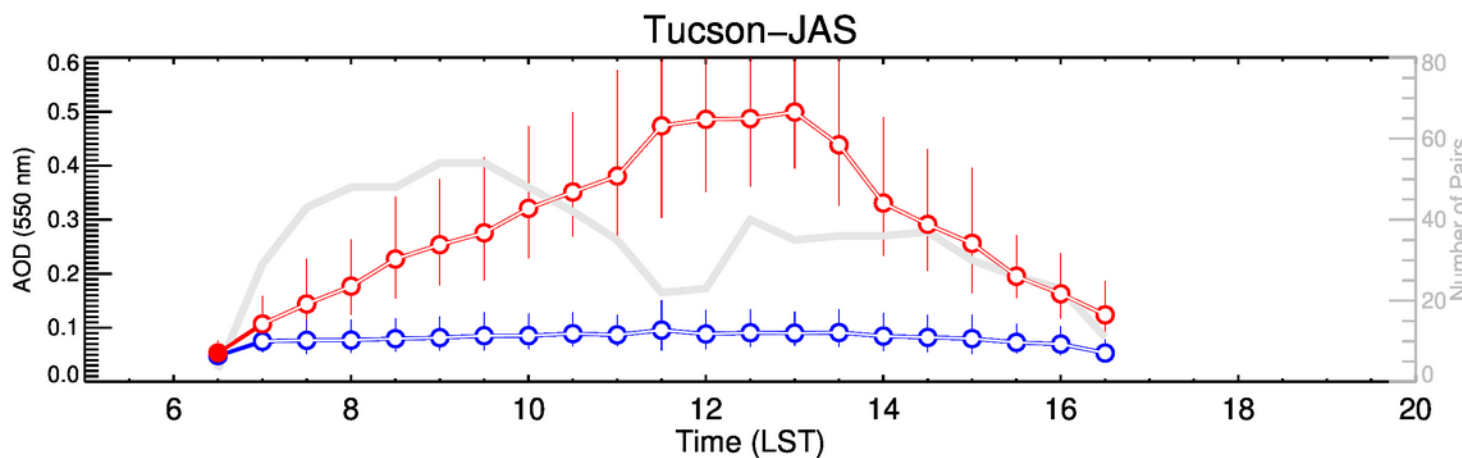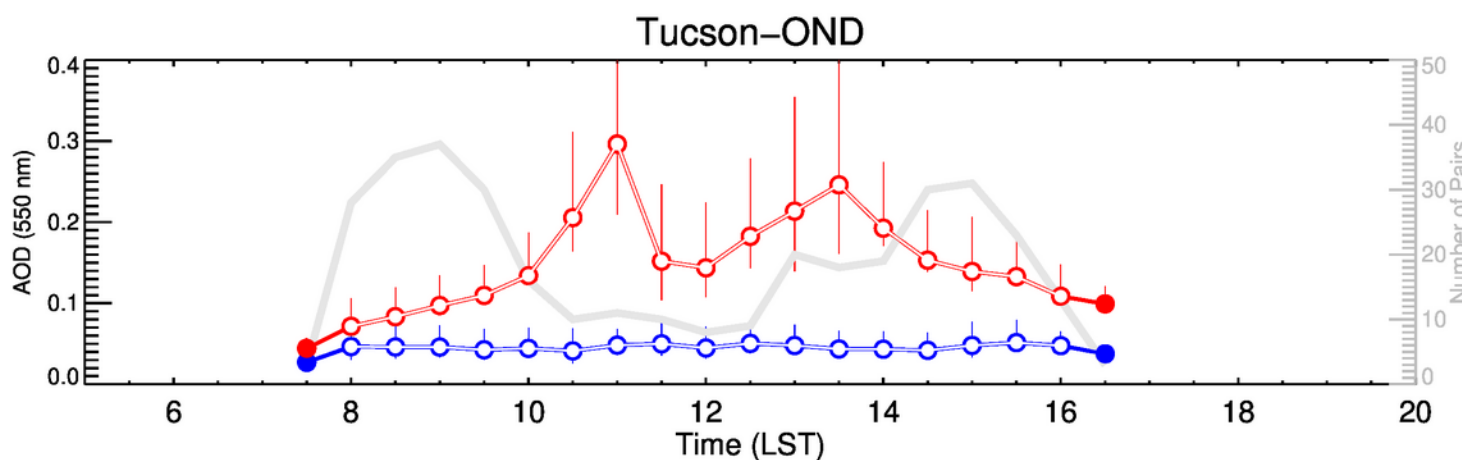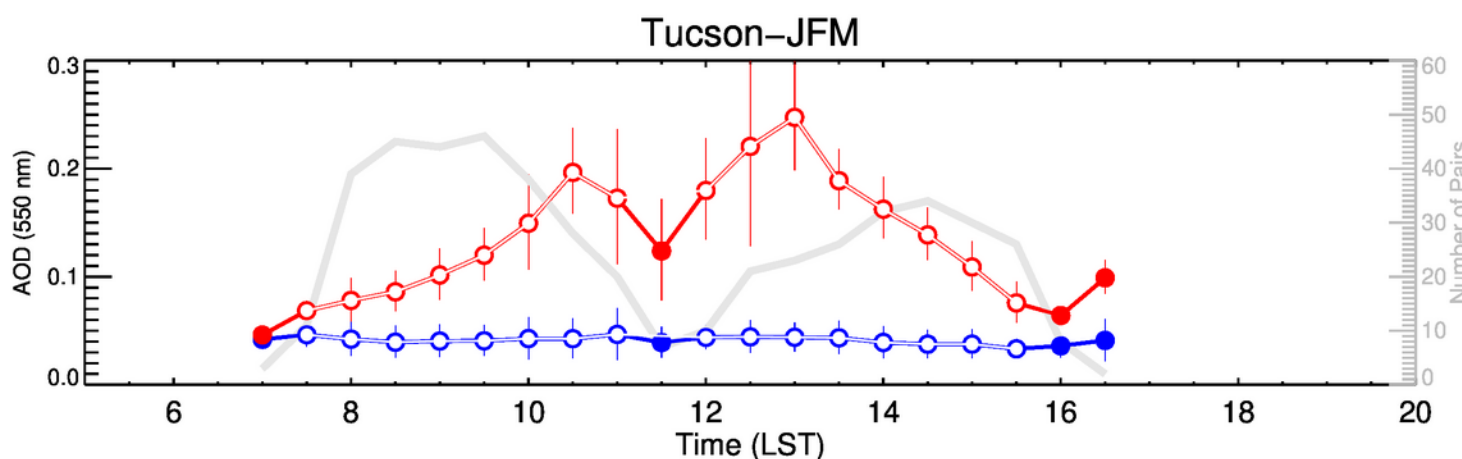

### Tudor\_Hill-AMJ

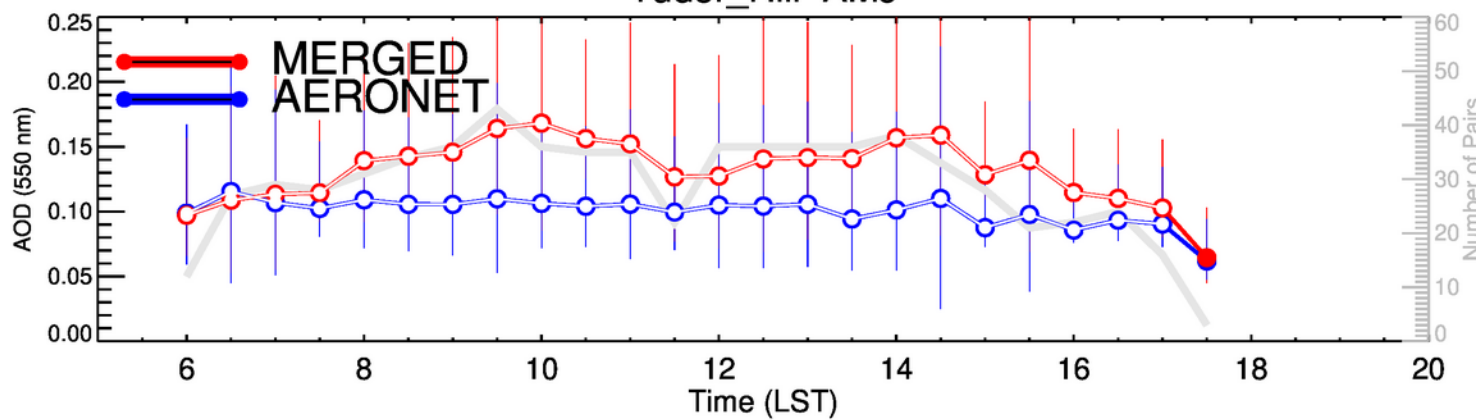

### Tudor\_Hill-JAS

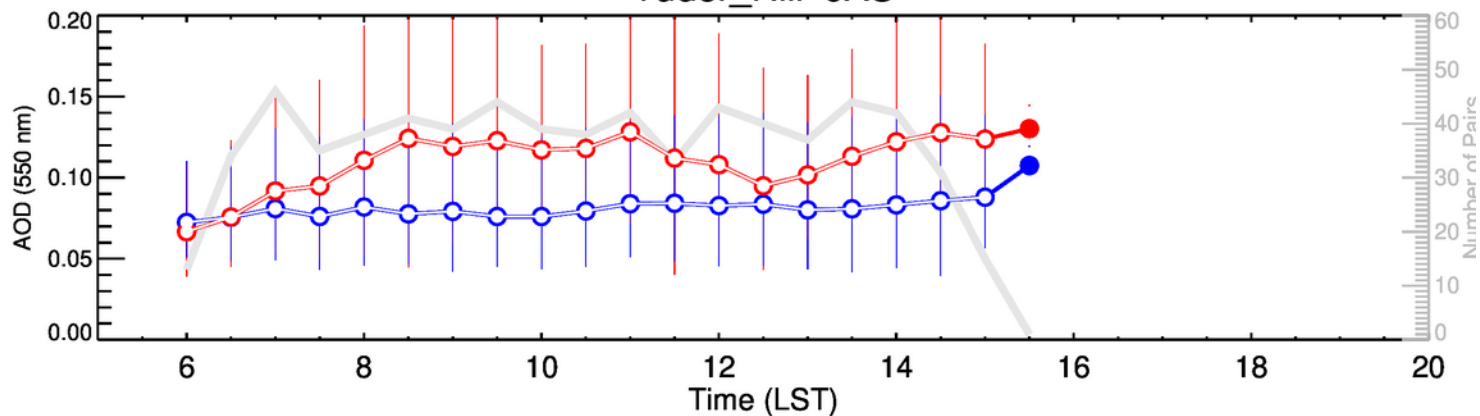

### Tudor\_Hill-OND

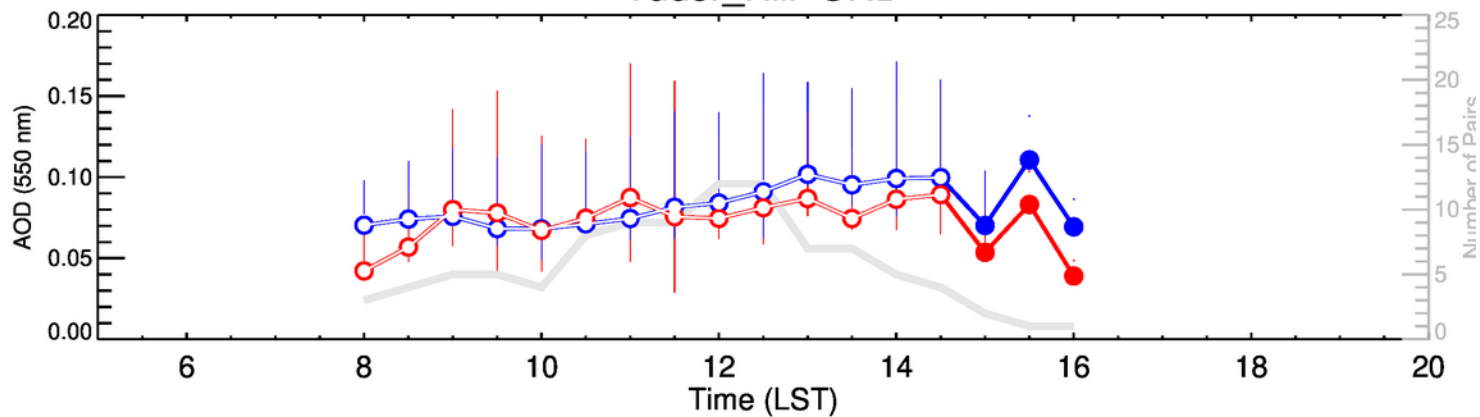

### Tudor\_Hill-JFM

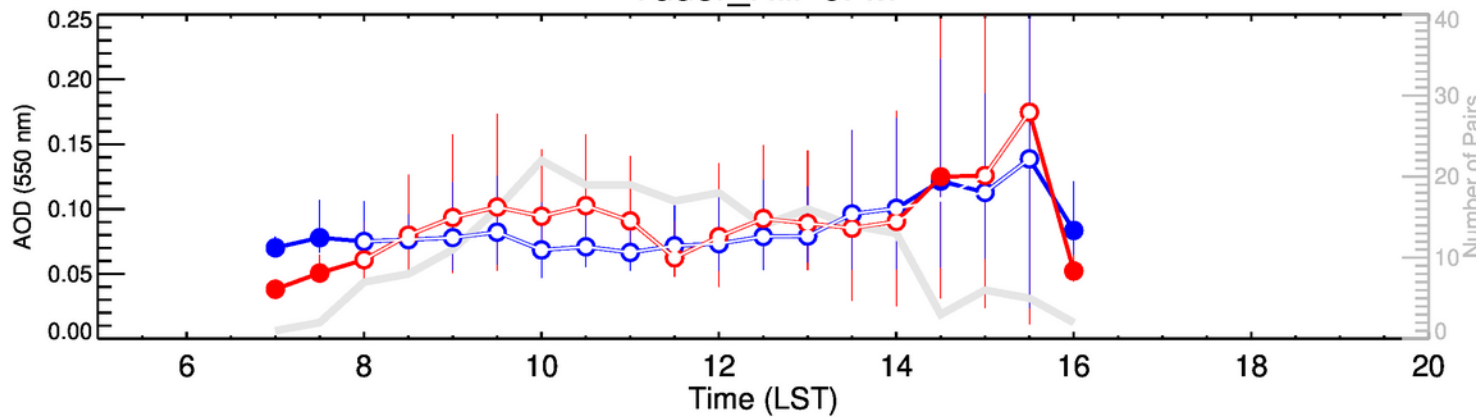

### Tunis\_Carthage-AMJ

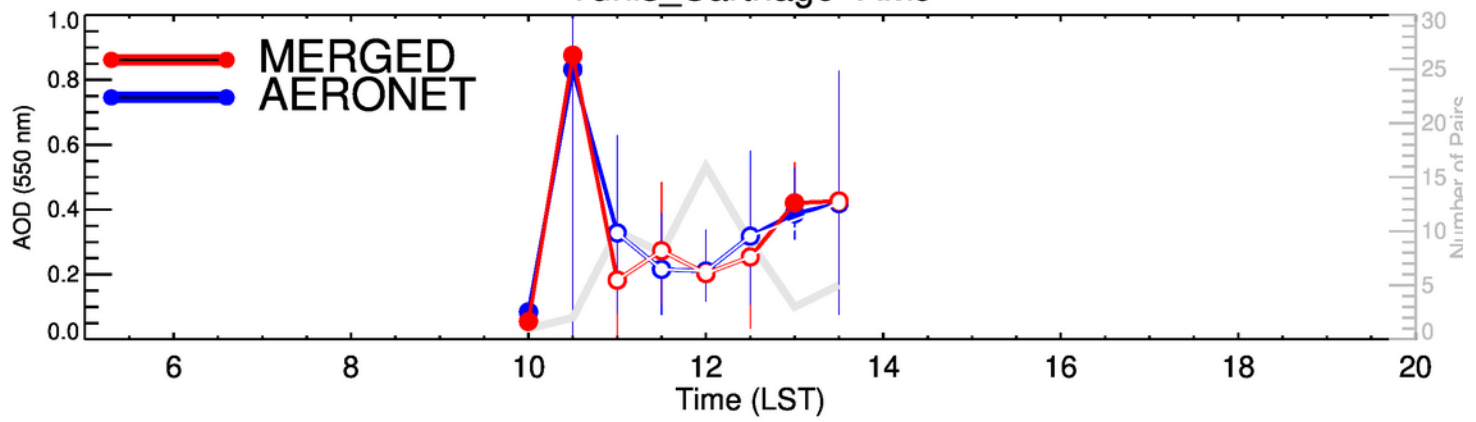

### Tunis\_Carthage-JAS

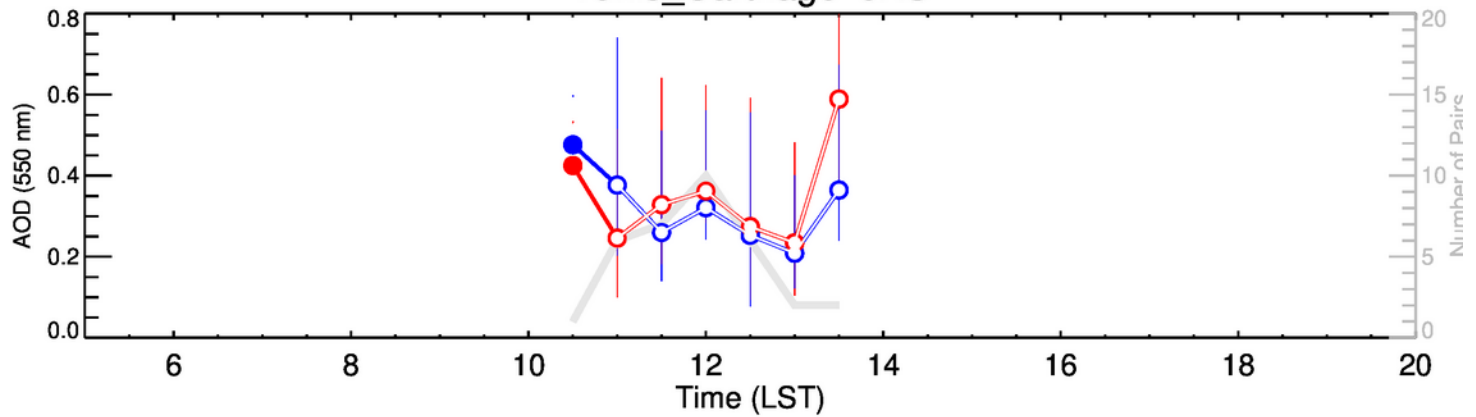

### Tunis\_Carthage-OND

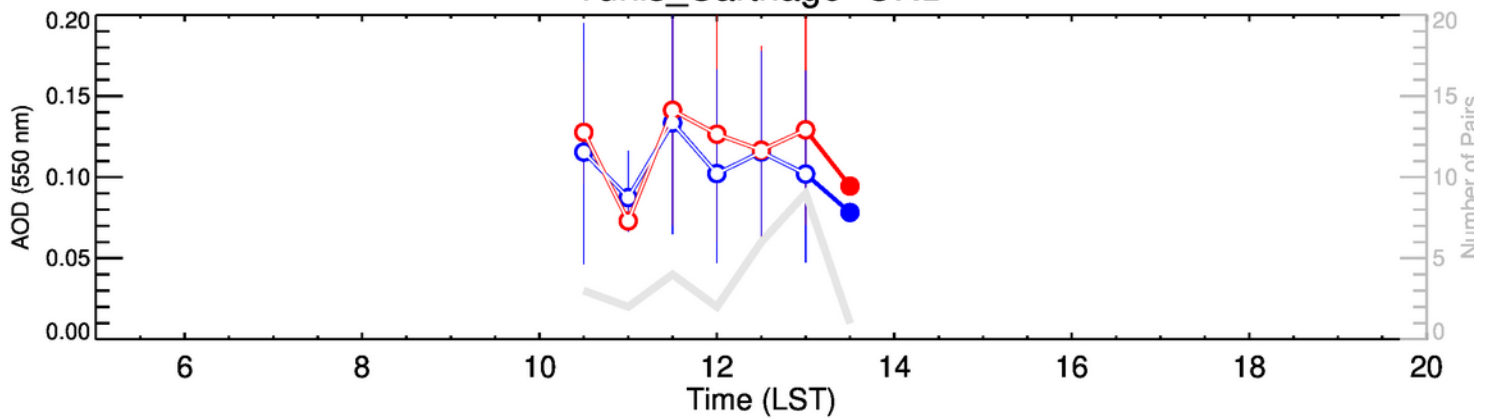

### Tunis\_Carthage-JFM

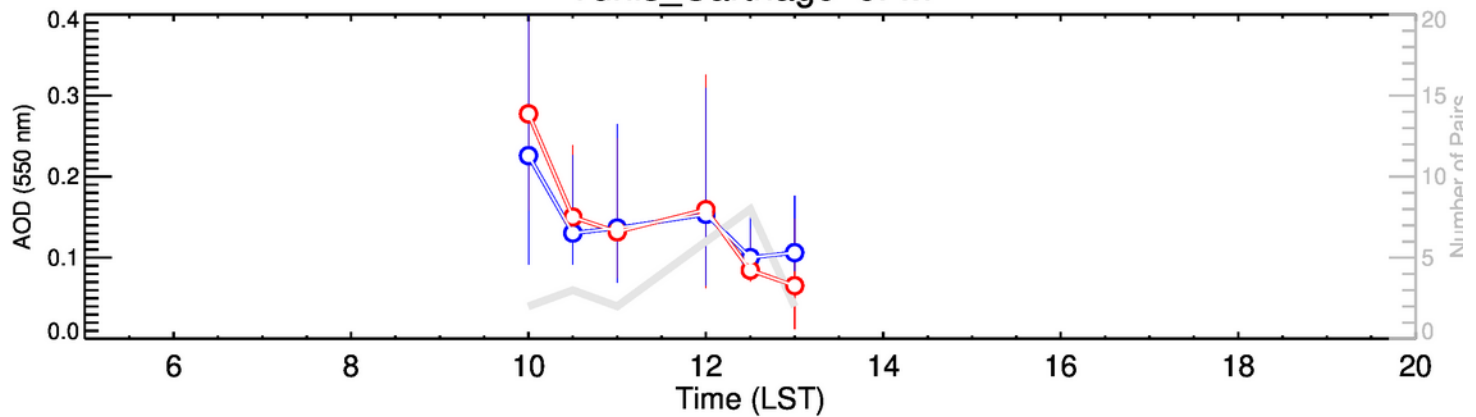

### U\_of\_Wisconsin\_SSEC-AMJ

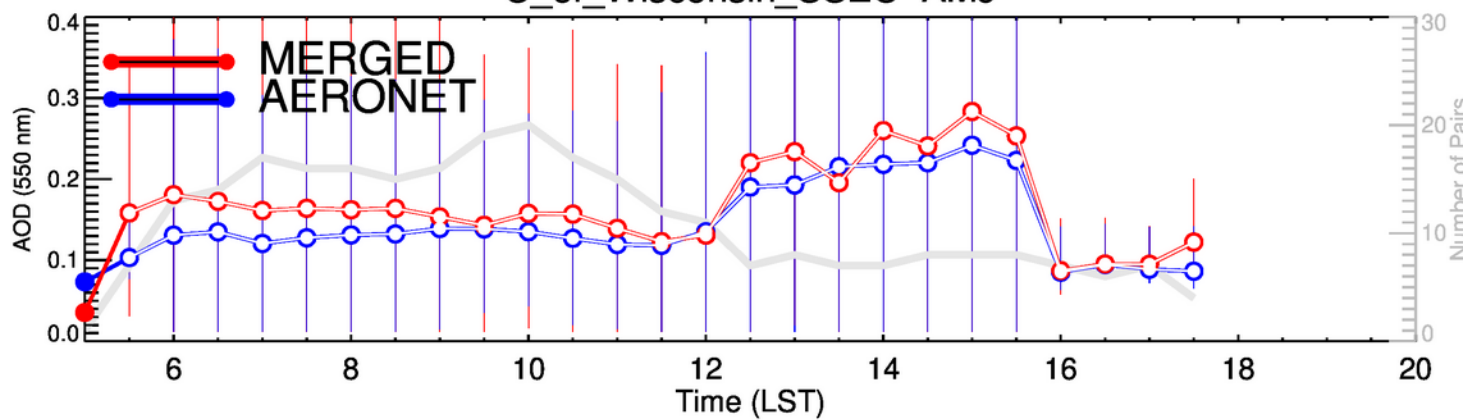

### U\_of\_Wisconsin\_SSEC-JAS

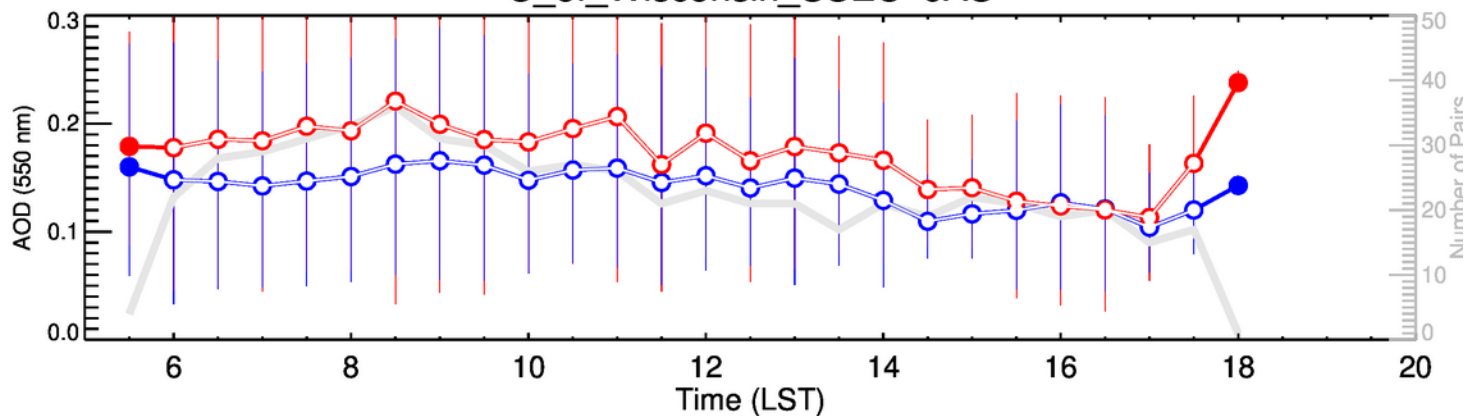

### U\_of\_Wisconsin\_SSEC-OND

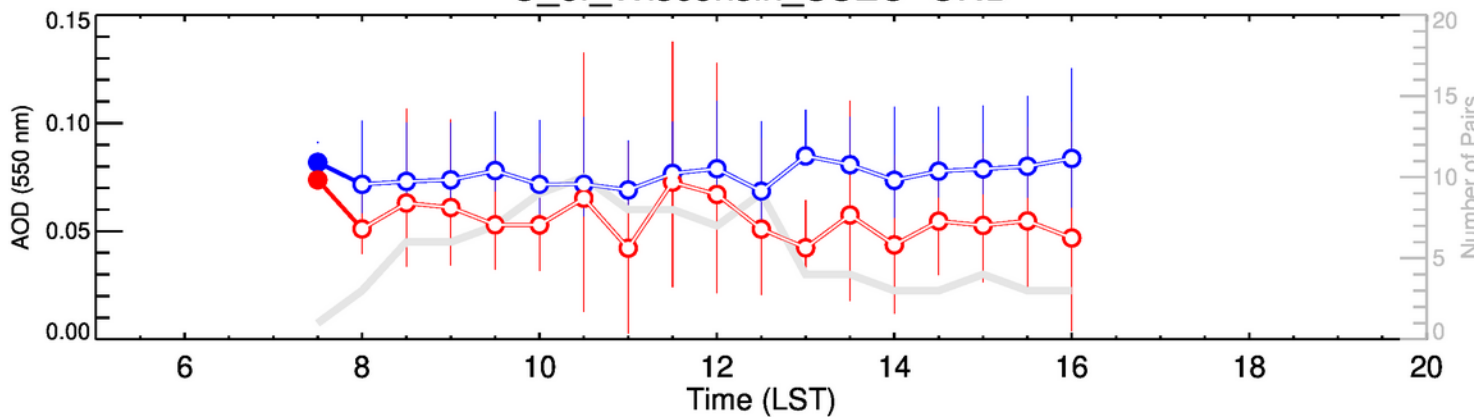

### U\_of\_Wisconsin\_SSEC-JFM

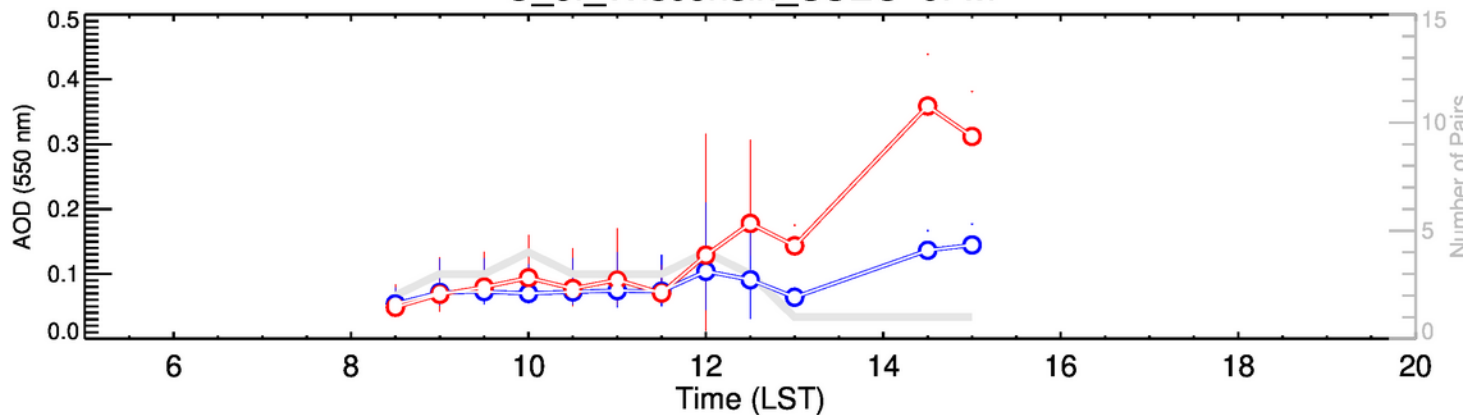

### UCSB-AMJ

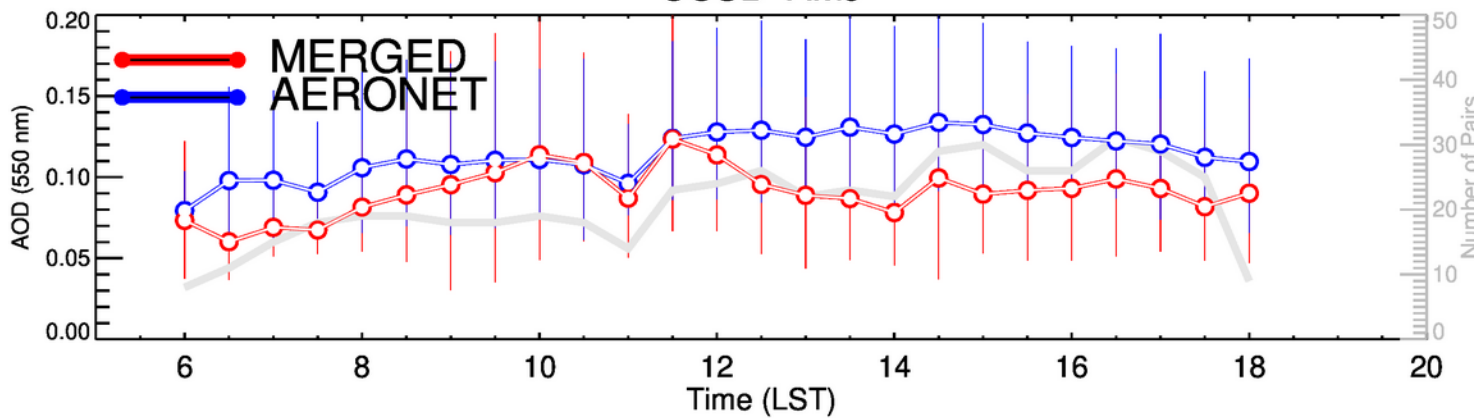

### UCSB-JAS

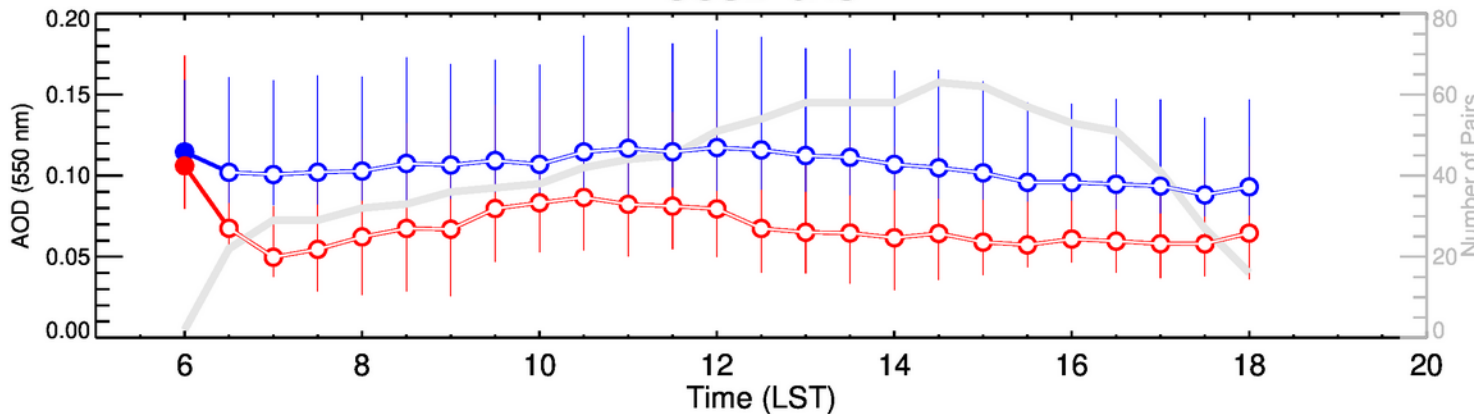

### UCSB-OND

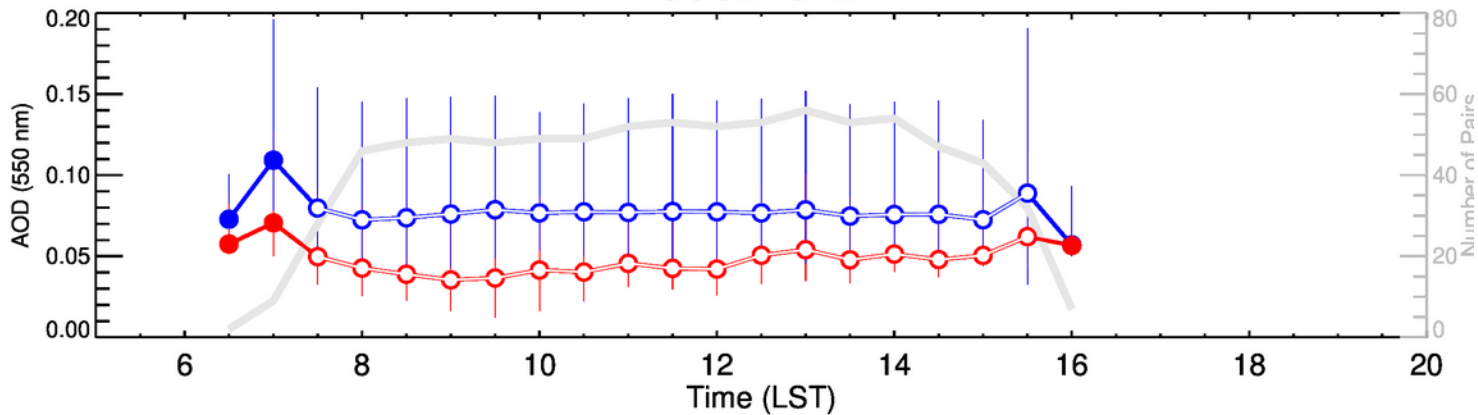

### UCSB-JFM

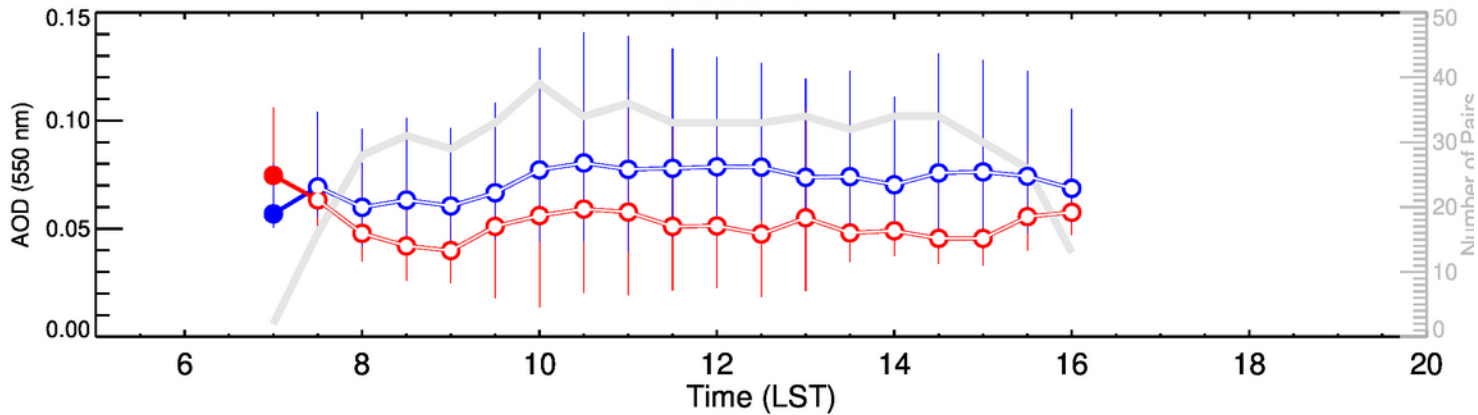

UNC-Palmira-AMJ

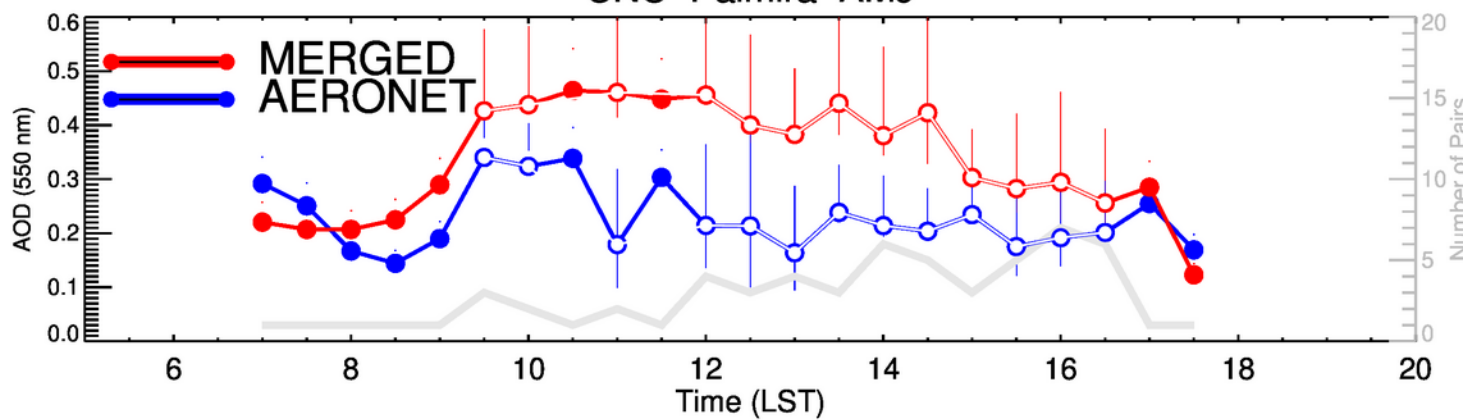

UNC-Palmira-JAS

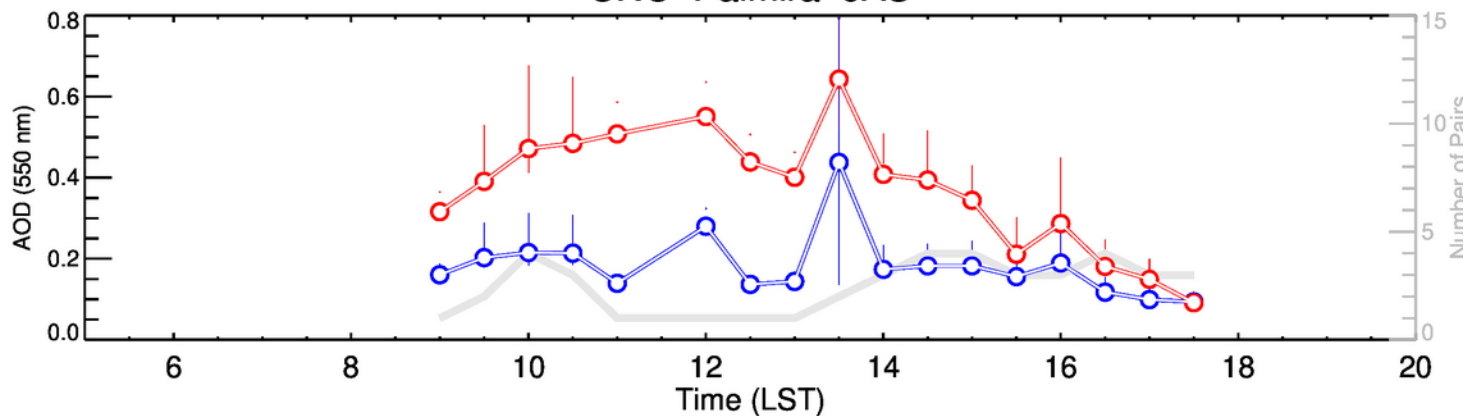

UNC-Palmira-OND

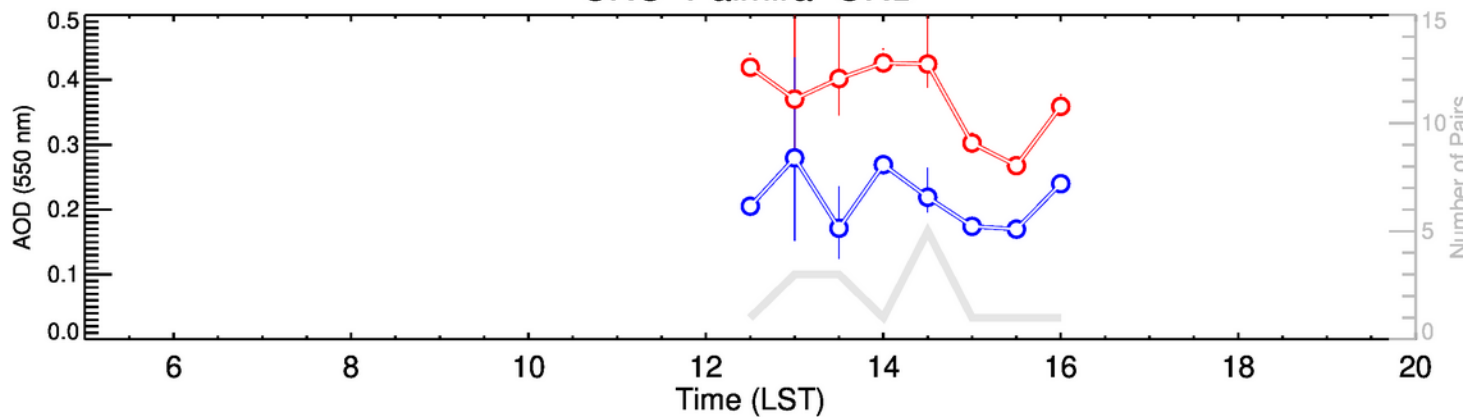

UNC-Palmira-JFM

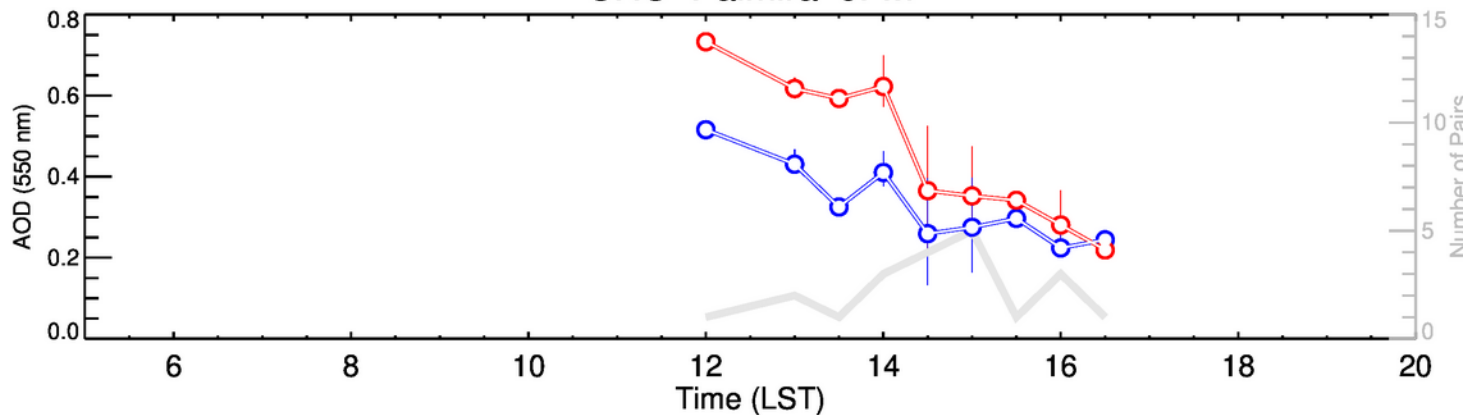



### USGS\_Flagstaff\_ROLO-AMJ

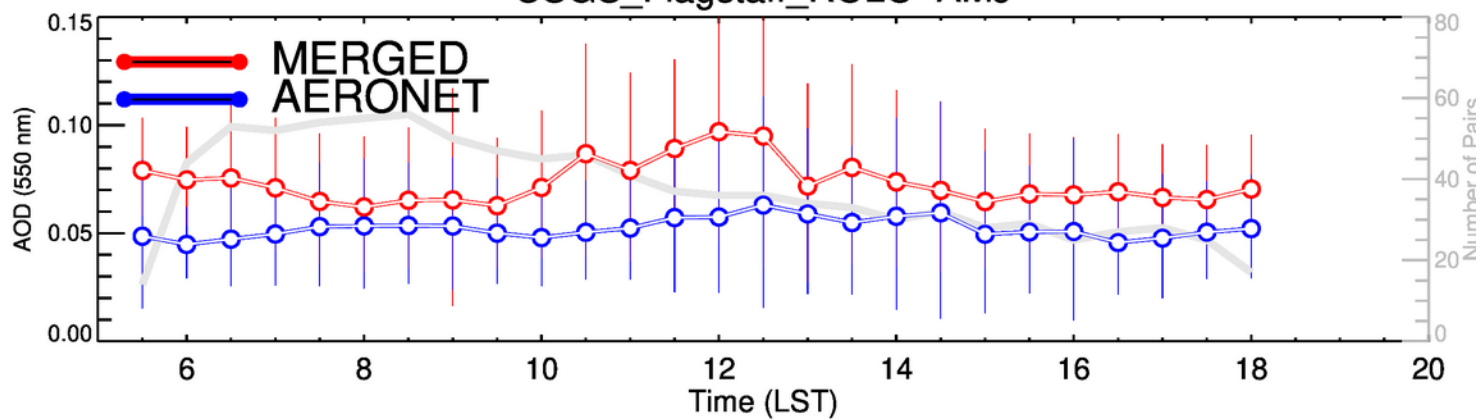

### USGS\_Flagstaff\_ROLO-JAS

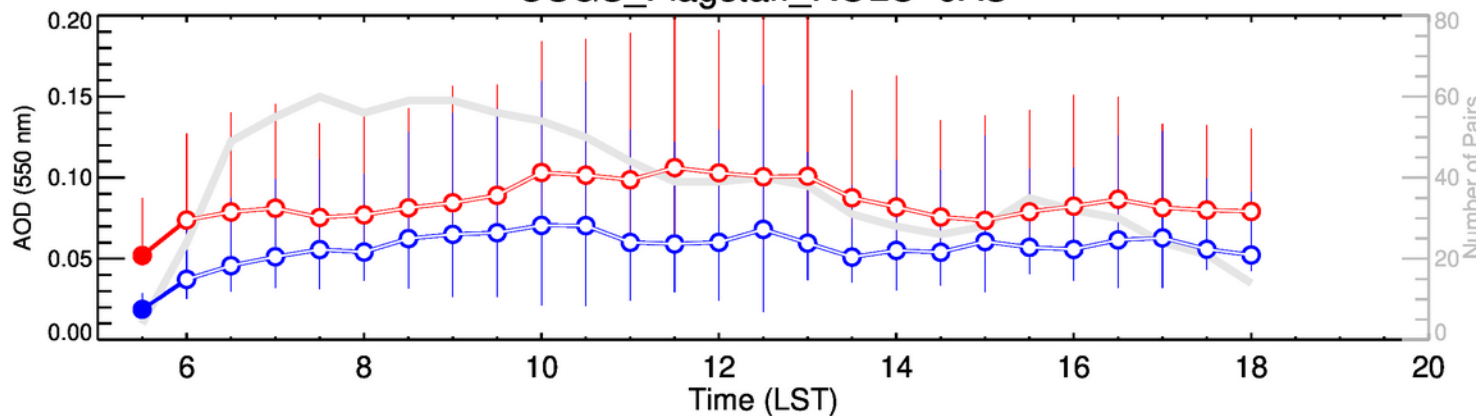

### USGS\_Flagstaff\_ROLO-OND

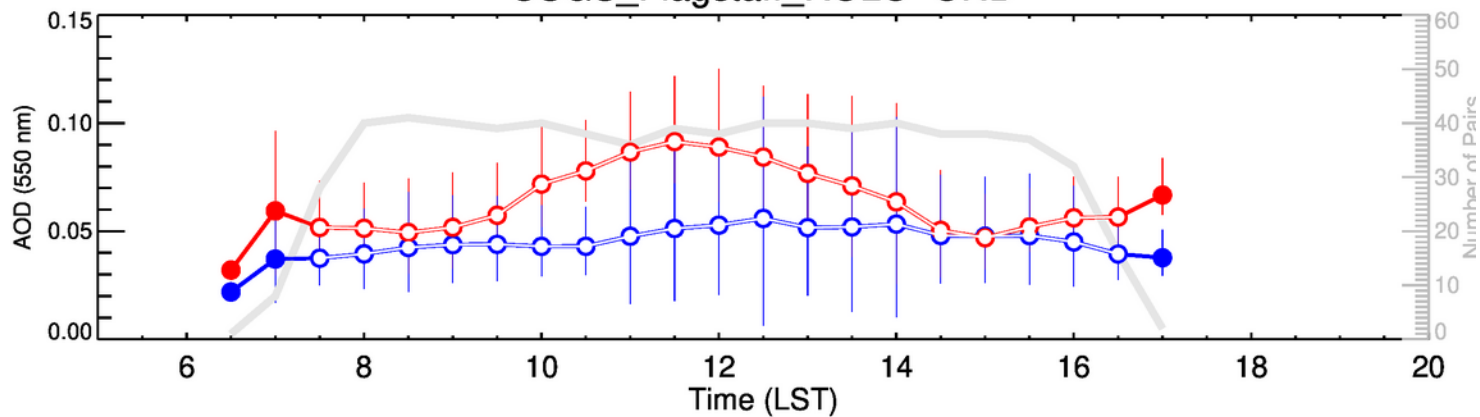

### USGS\_Flagstaff\_ROLO-JFM

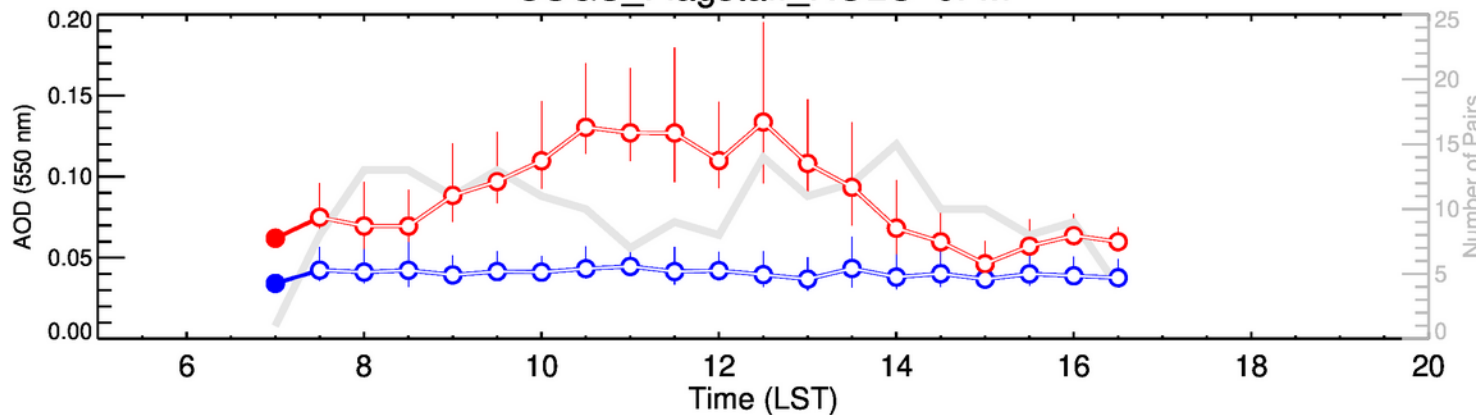

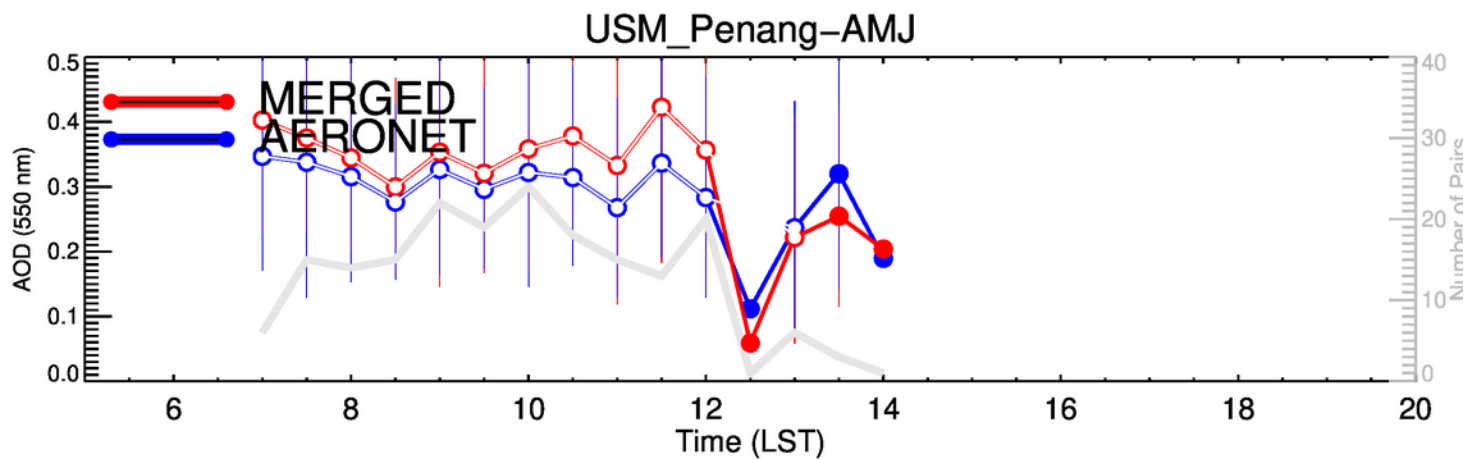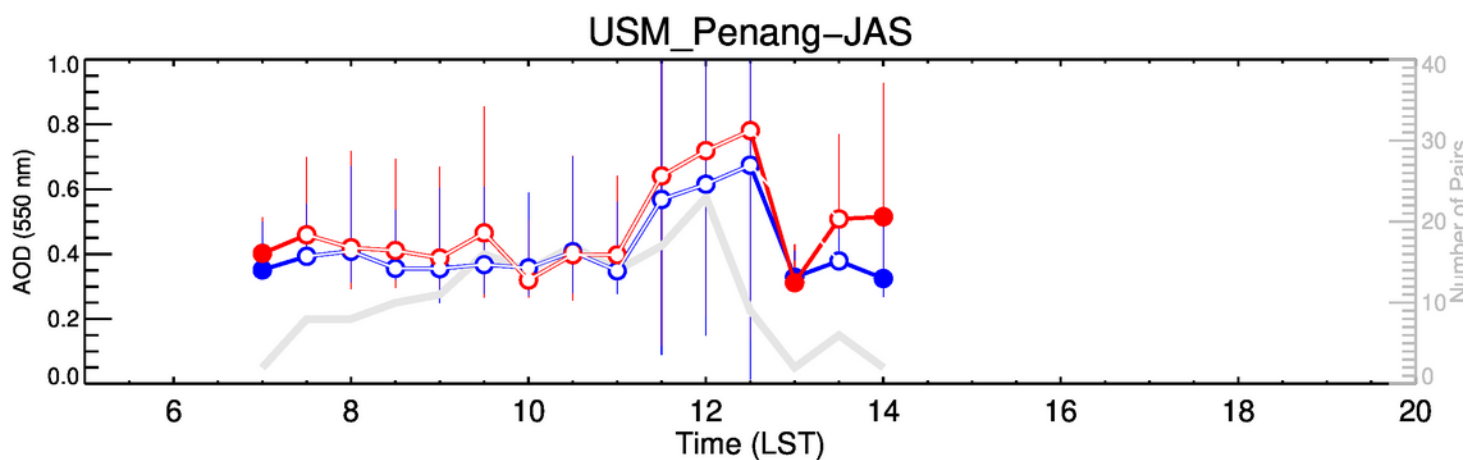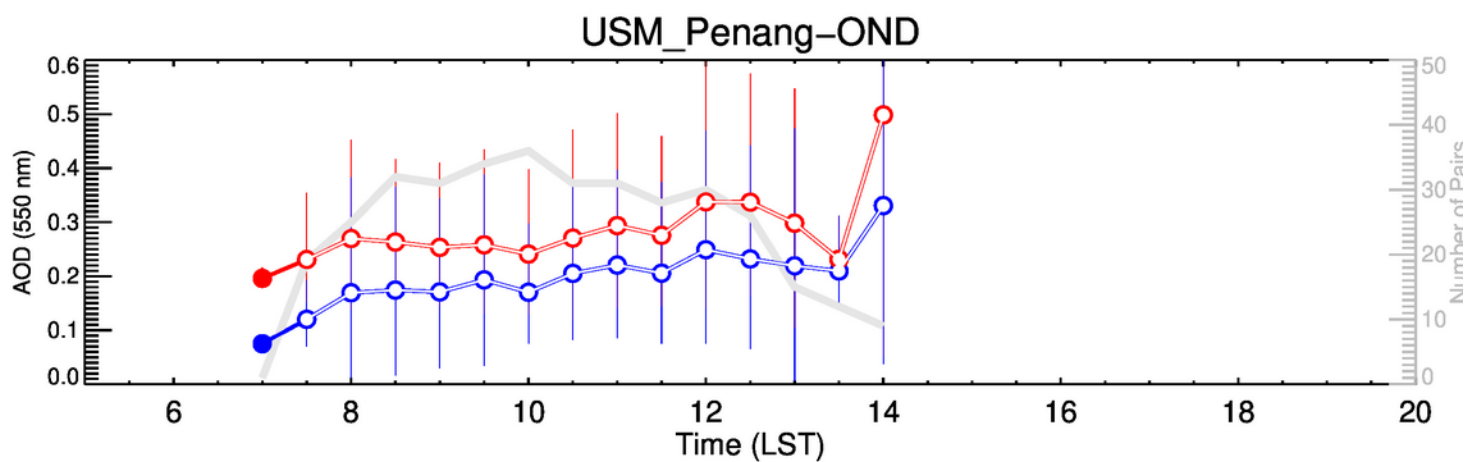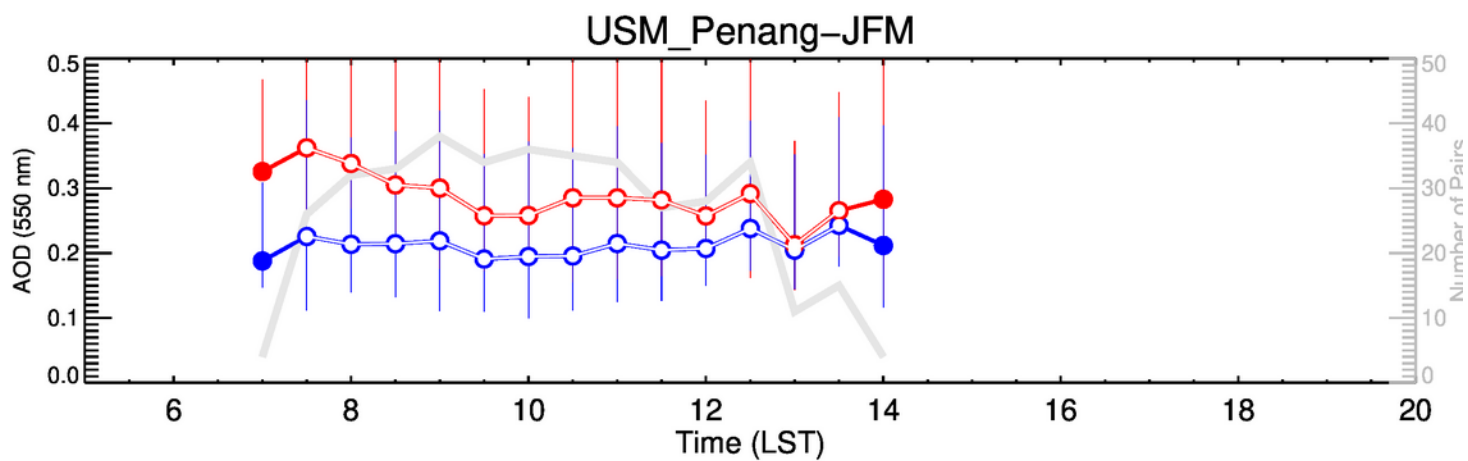

### Valladolid-AMJ

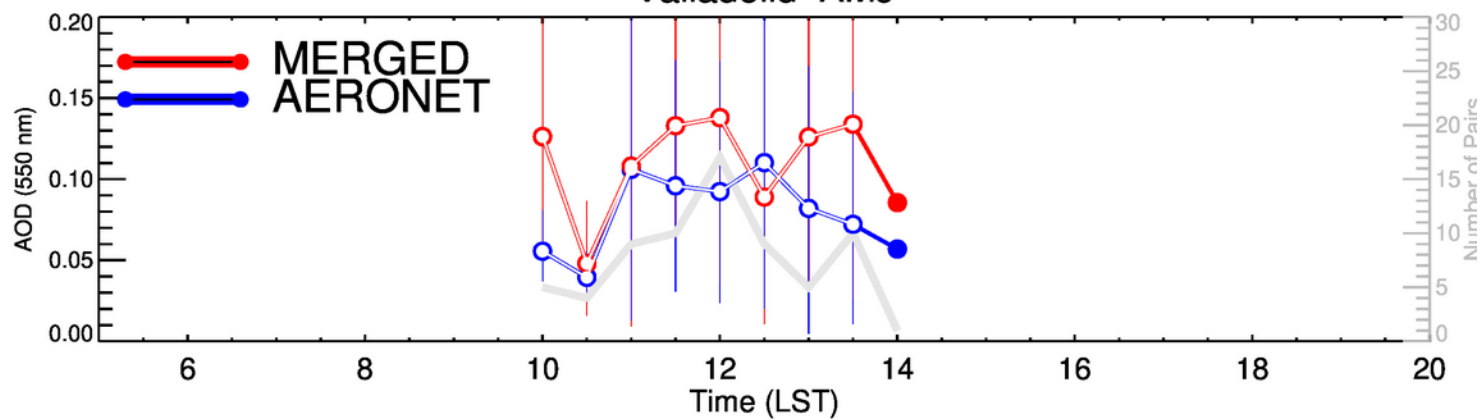

### Valladolid-OND

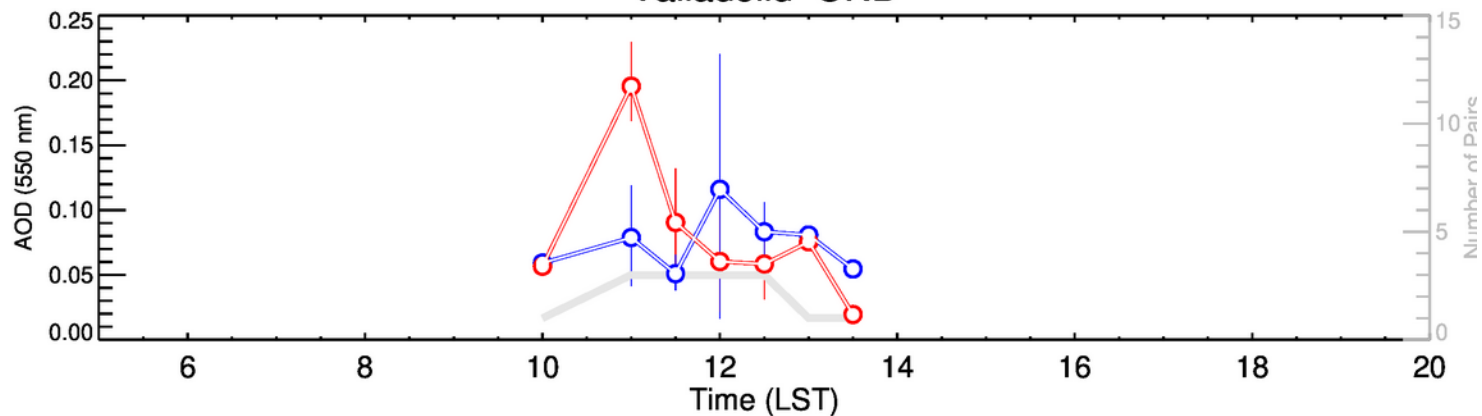

### Valladolid-JFM

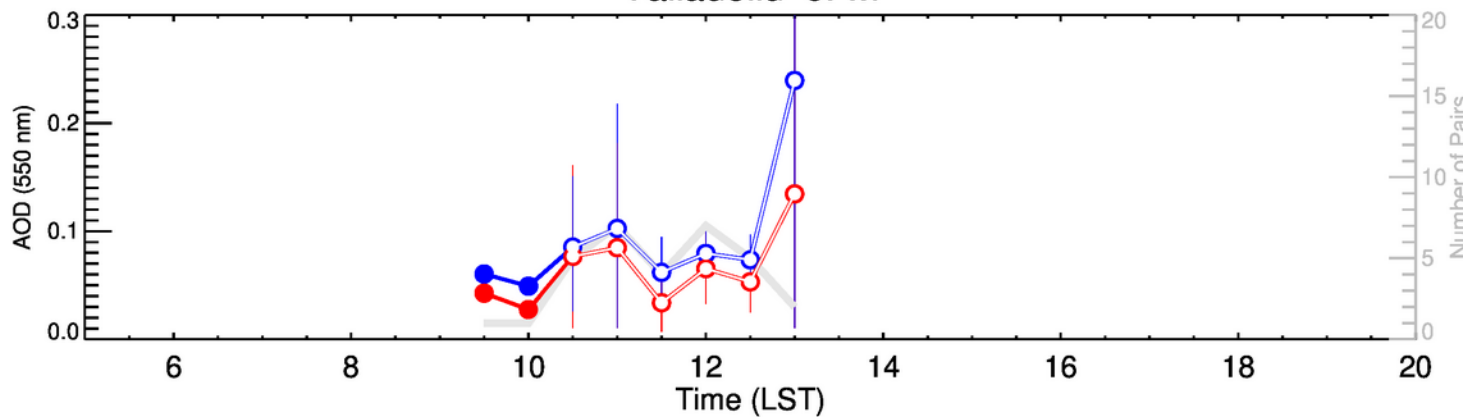

### Vienna\_UNIVIE-OND

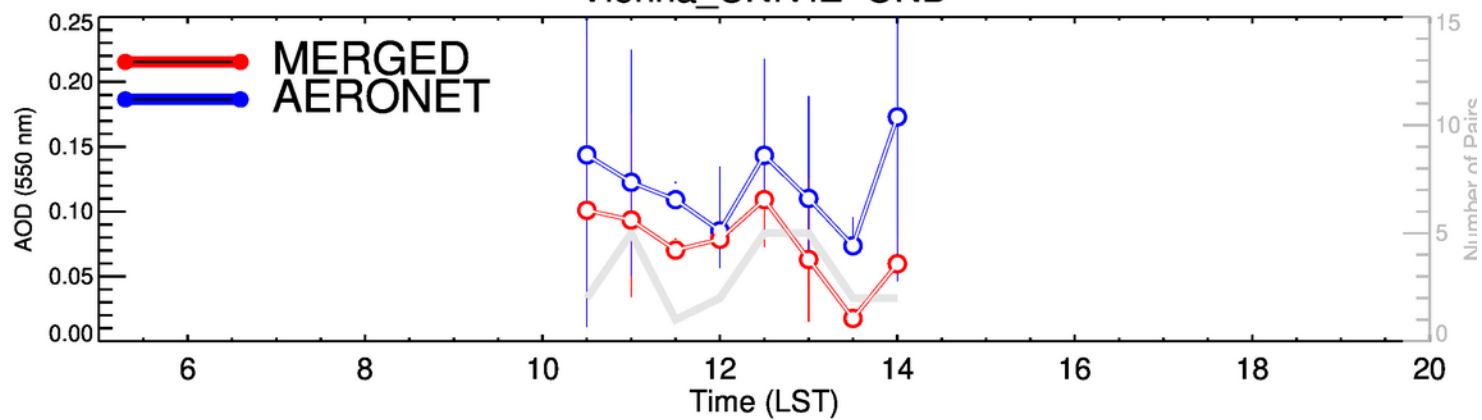

### Vienna\_UNIVIE-JFM

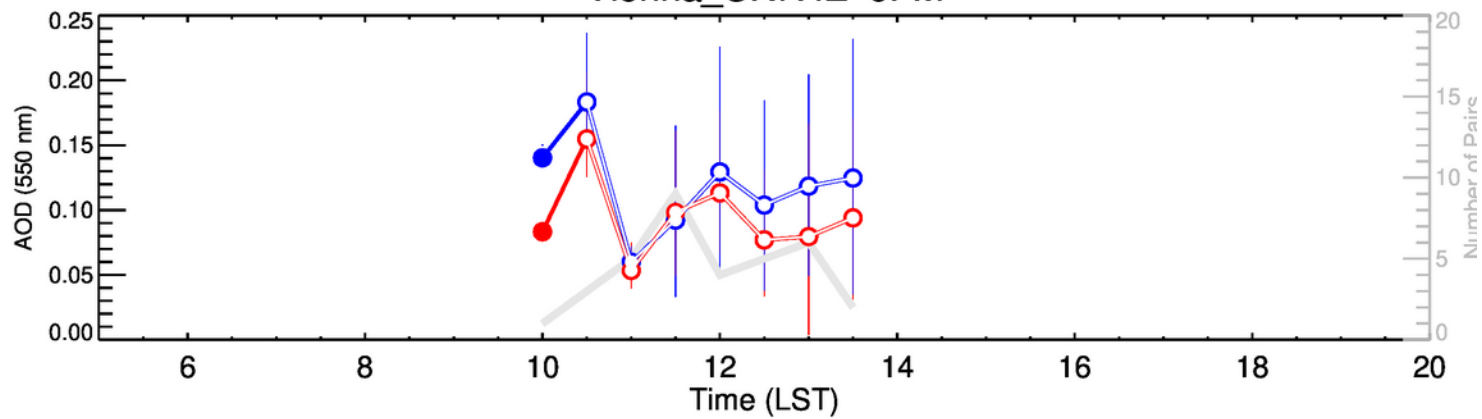

### Wallops-AMJ

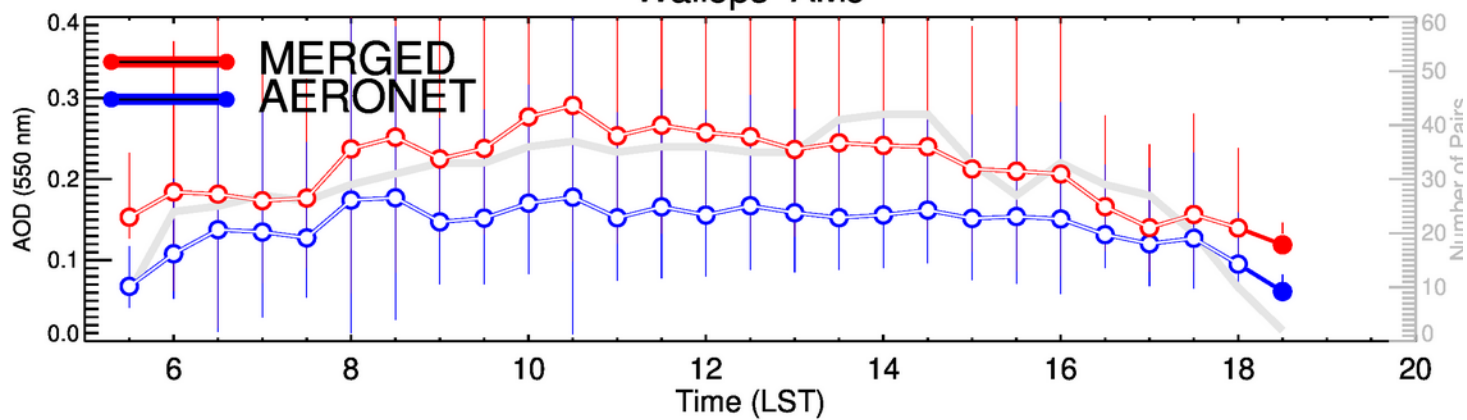

### Wallops-JAS

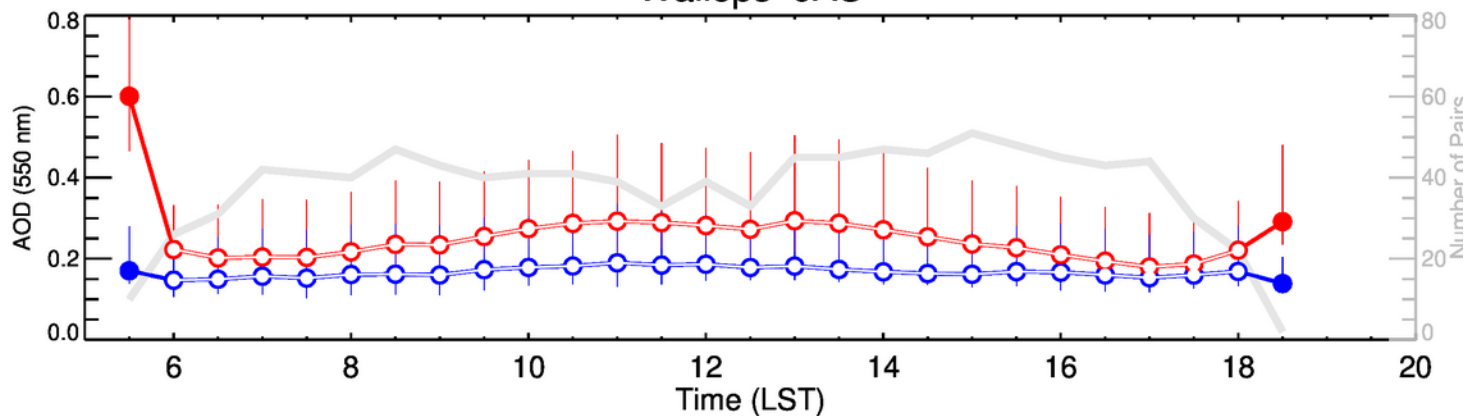

### Wallops-OND

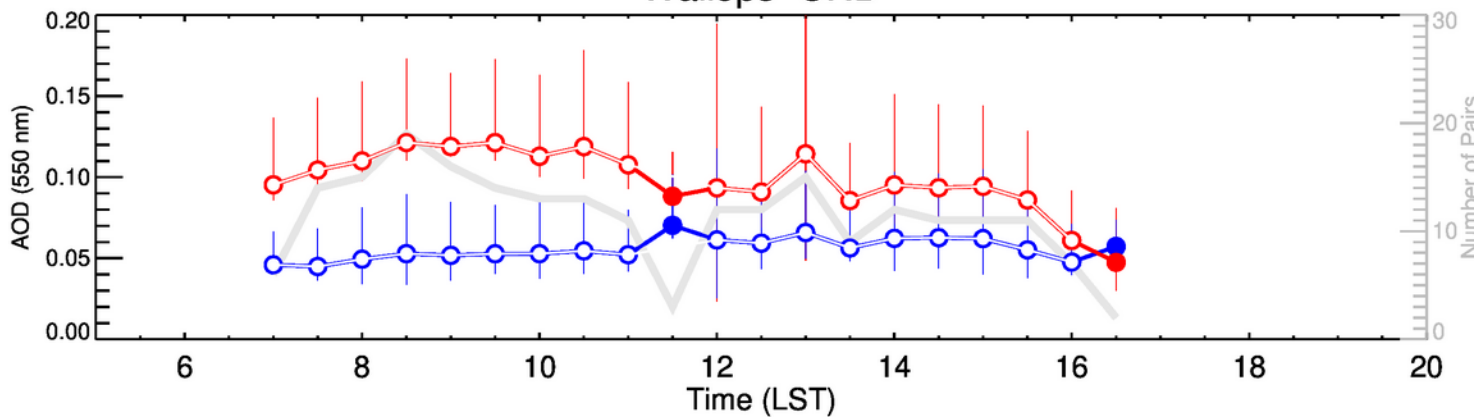

### Wallops-JFM

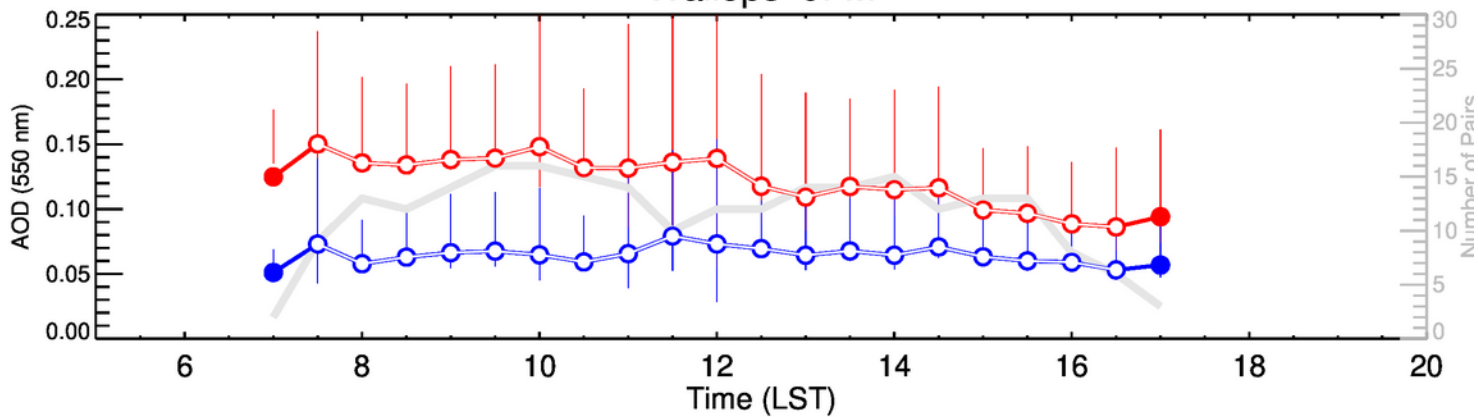

Weizmann\_Institute-AMJ

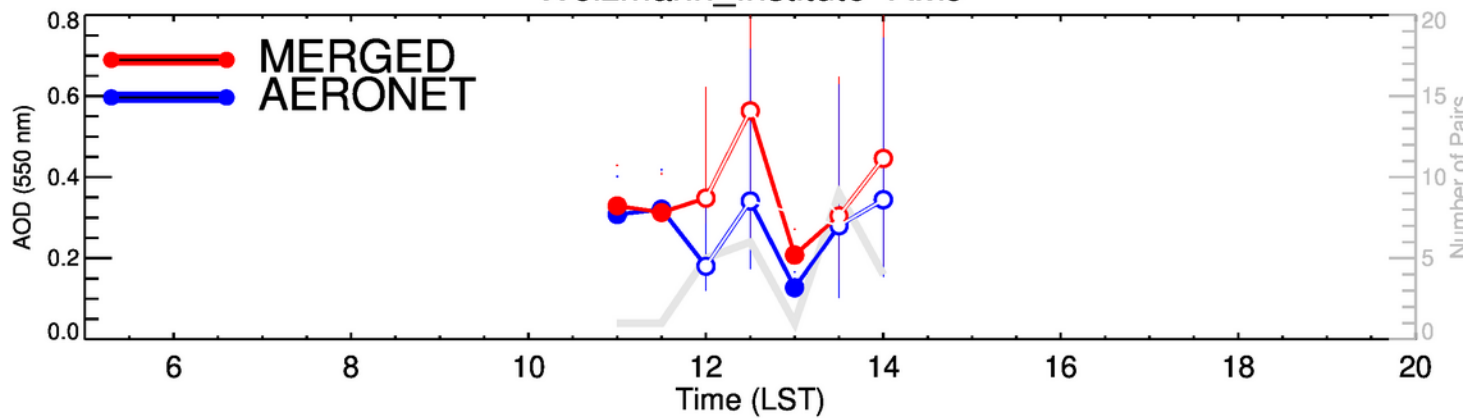

Weizmann\_Institute-JAS

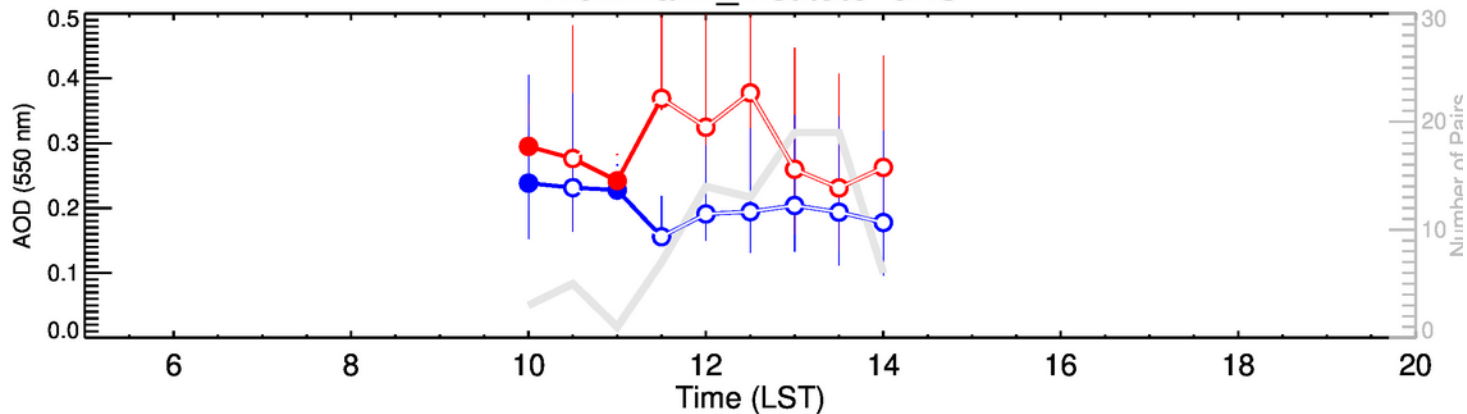

Weizmann\_Institute-OND

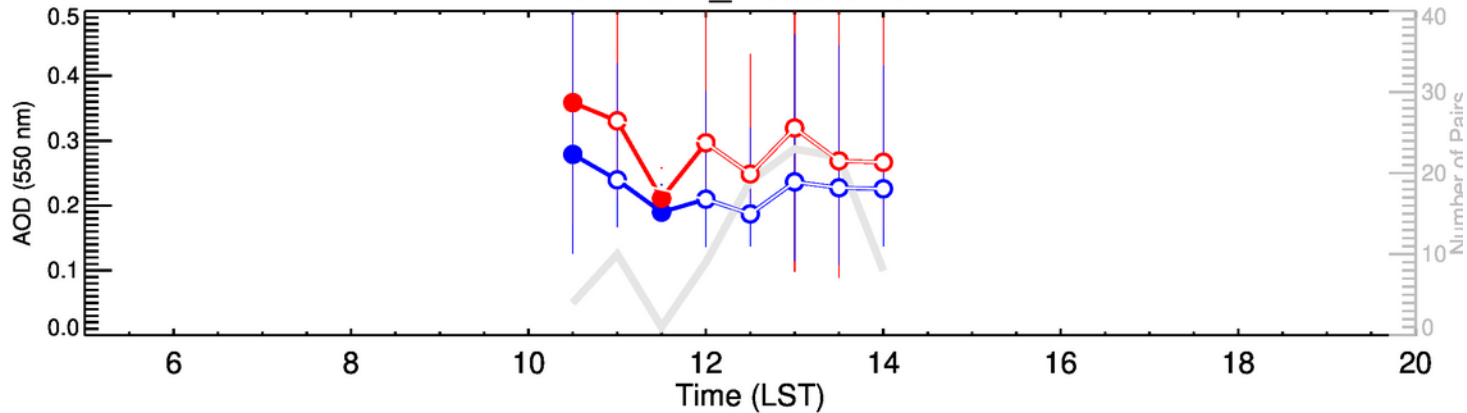

Weizmann\_Institute-JFM

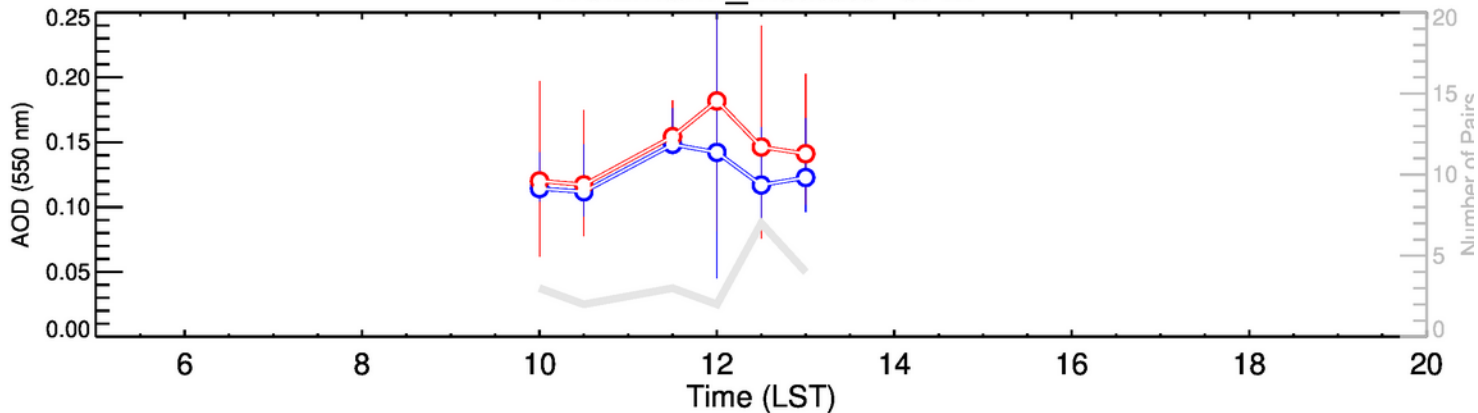

### XiangHe-AMJ

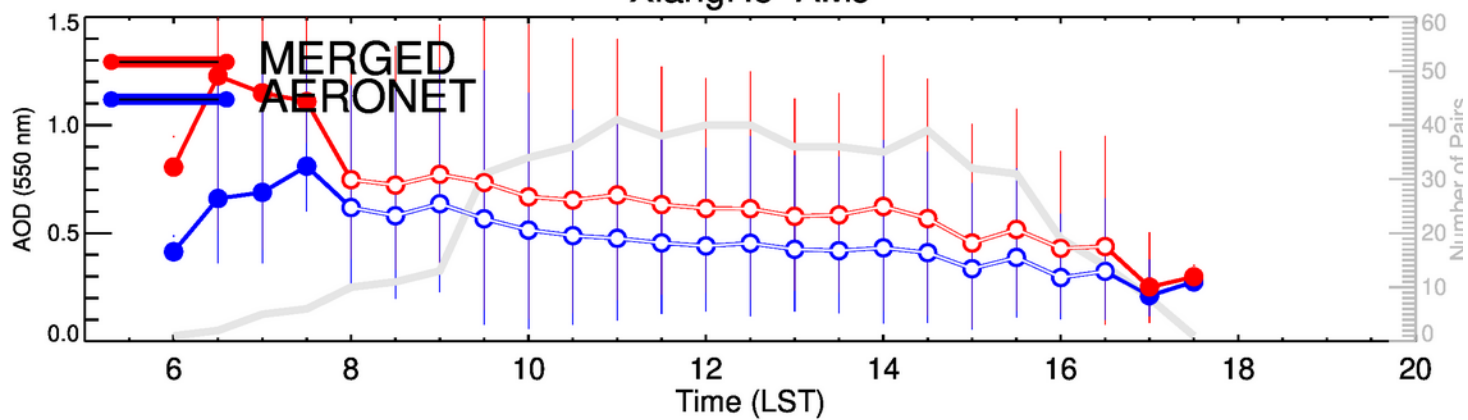

### XiangHe-JAS

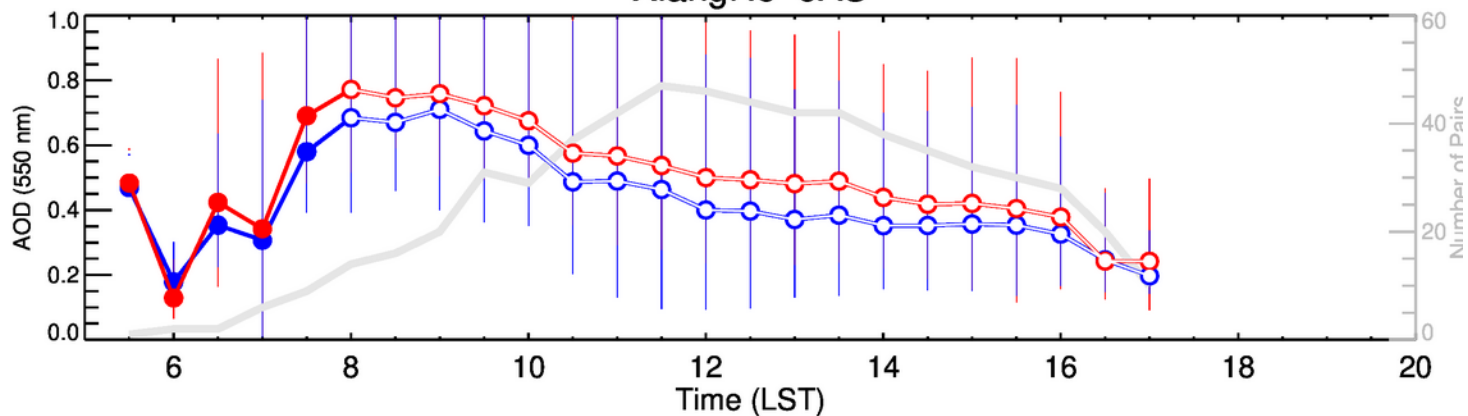

### XiangHe-OND

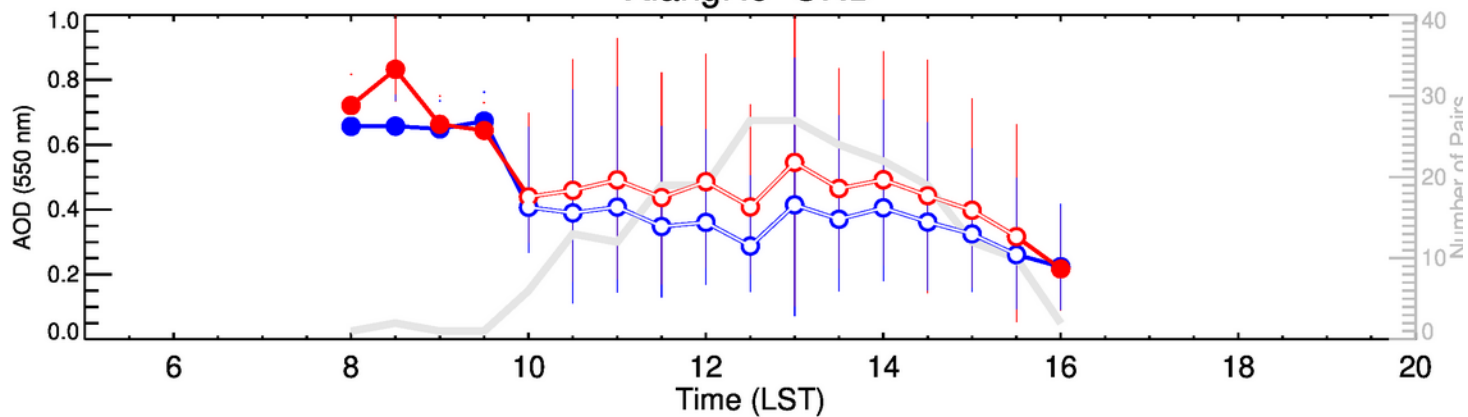

### XiangHe-JFM

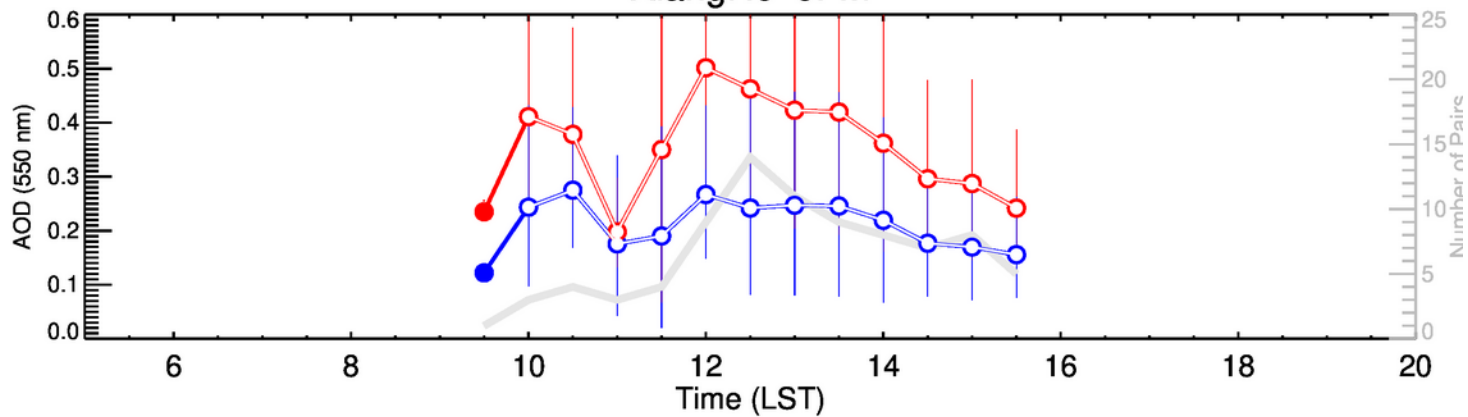

### Xitun-AMJ

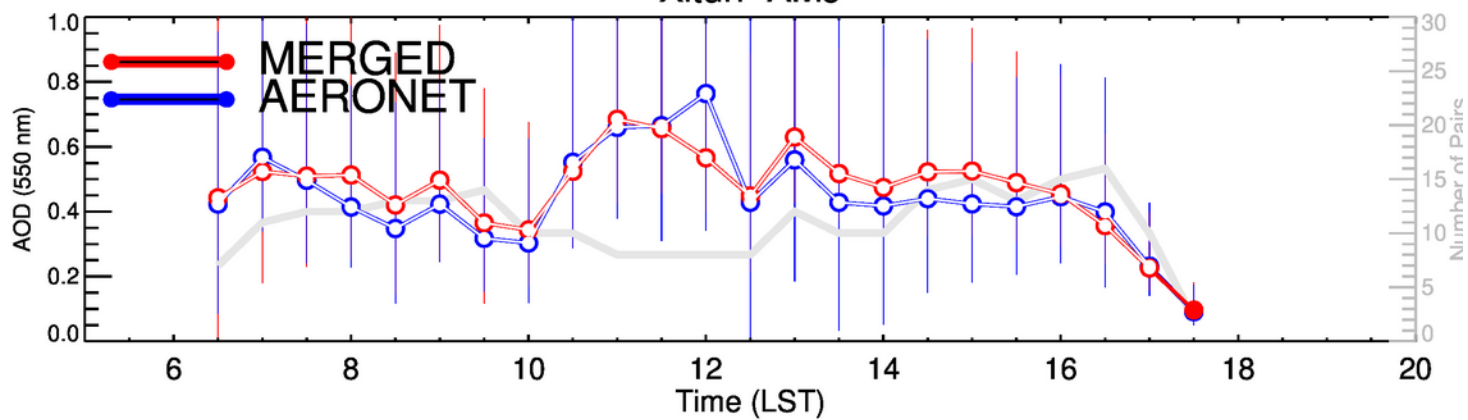

### Xitun-JAS

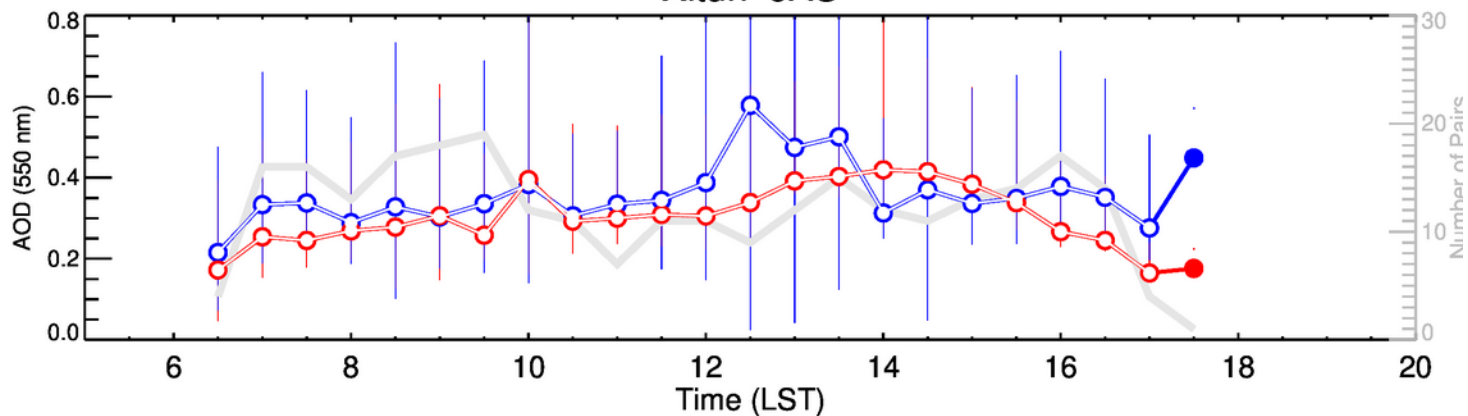

### Xitun-OND

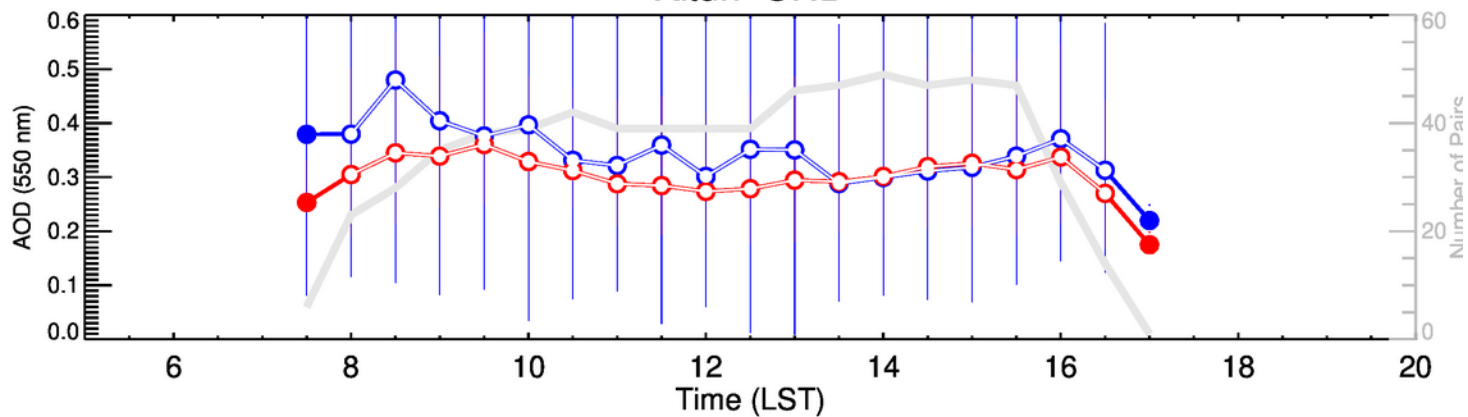

### Xitun-JFM

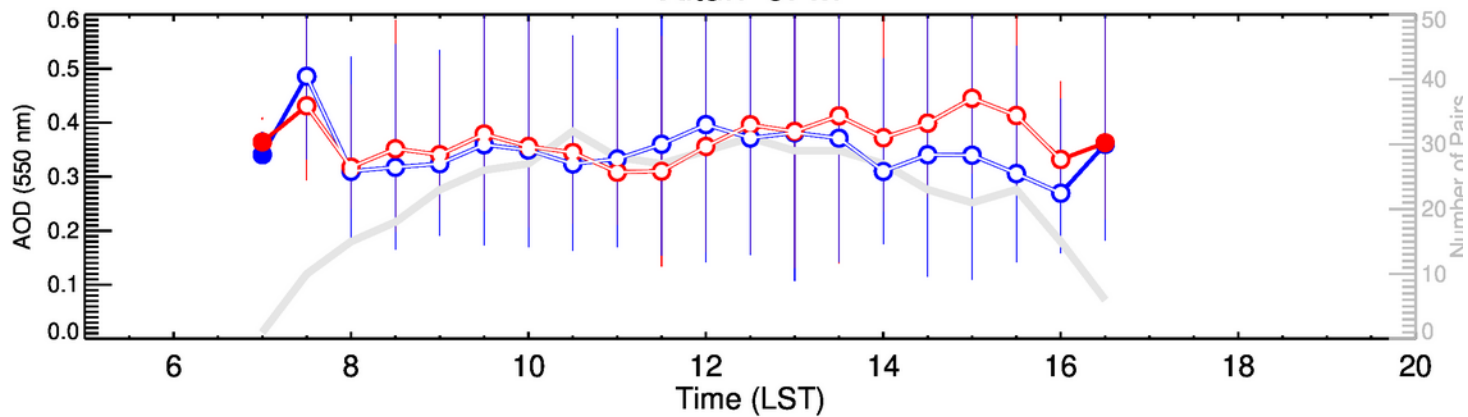

Supplement: Supplementary file 1 [file amt-17-5455-2024-supplement.pdf]
